# Supplementary material for: Reduced greenhouse gas emissions from particulate organic matter degradation in iron-enriched sediments
Source: Royal Society of Chemistry journal article supplement (doi:10.1039/d4em00185k), 2024-01-01
Supplement: d4em00185k2.xlsx [file d4em00185k2.xlsx]

## Sheet: ReadMe
ESI-B Electronic Supplement to:
Reduced greenhouse gas emissions from particulate organic matter degradation in iron-enriched sediments
Authors: Giulia Kommana, Michael Hupfer, Jason Woodhouse, Hans-Peter Grossart, Tobias Goldhammer
*correspondence to: tobias.goldhammer@igb-berlin.de
This file contains five worksheets
A	Headspace concentrations of CH4 in oxic incubations. Please note that Fe0 = SedFe_low, FeI = SedFe_med, FeII = SedFe_high
B	Headspace concentrations of CH4 in anoxic incubations. Please note that Fe0 = SedFe_low, FeI = SedFe_med, FeII = SedFe_high
C	Headspace concentrations of CO2 in oxic incubations. Please note that Fe0 = SedFe_low, FeI = SedFe_med, FeII = SedFe_high
D	Headspace concentrations of CO2 in anoxic incubations. Please note that Fe0 = SedFe_low, FeI = SedFe_med, FeII = SedFe_high
E	Results of microbial community analysis, based on OTU counts retrieved in 16S sequencing

## Sheet: A HeadspaceCH4_oxic
Sample ID	Group	Day	Concentration [ppm]	ppm/ gC
1	FeII	1	12.5586	20.4987
2	FeII	1	5.37561	8.77428
3	FeII	1	9.9177	16.1881
4	FeII	1	9.05751	14.784
9	FeII_P	1	142.882	183.498
10	FeII_P	1	98.021	125.885
11	FeII_P	1	136.433	175.216
12	FeII_P	1	188.152	241.638
17	FeII_B	1	21.45	27.5475
18	FeII_B	1	12.7621	16.3899
20	FeII_B	1	14.9772	19.2347
25	FeI	1	14.0948	20.7839
26	FeI	1	5.69529	8.3982
27	FeI	1	4.78589	7.05721
28	FeI	1	6.95534	10.2563
33	FeI_P	1	231.41	274.131
34	FeI_P	1	250.591	296.854
35	FeI_P	1	251.02	297.362
36	FeI_P	1	250.055	296.218
41	FeI_B	1	38.3546	45.4354
42	FeI_B	1	28.4727	33.7292
43	FeI_B	1	20.4565	24.2331
44	FeI_B	1	35.4299	41.9707
49	Fe0	1	37.86	53.2022
50	Fe0	1	9.68709	13.6126
51	Fe0	1	7.60256	10.6834
52	Fe0	1	7.03478	9.88553
57	Fe0_P	1	393.764	448.671
58	Fe0_P	1	281.645	320.917
59	Fe0_P	1	329.818	375.807
60	Fe0_P	1	326.293	371.791
65	Fe0_B	1	84.0639	95.7858
66	Fe0_B	1	54.5558	62.163
68	Fe0_B	1	54.665	62.2875
73	H2O	1	3.26662
74	H2O	1	5.20739
75	H2O	1	2.93612
76	H2O	1	3.26662
1	FeII	7	7.19692	11.7471
2	FeII	7	5.72286	9.34108
3	FeII	7	6.01779	9.82248
4	FeII	7	5.03443	8.21741
9	FeII_P	7	778.962	1000.4
10	FeII_P	7	924.822	1187.72
11	FeII_P	7	932.723	1197.86
12	FeII_P	7	913.194	1172.78
17	FeII_B	7	114.723	147.335
18	FeII_B	7	114.585	147.157
20	FeII_B	7	11.0706	14.2176
25	FeI	7	7.15646	10.5528
26	FeI	7	6.4218	9.4695
27	FeI	7	5.5745	8.22008
28	FeI	7	6.04891	8.91964
33	FeI_P	7	1168.78	1384.56
34	FeI_P	7	1269.27	1503.6
35	FeI_P	7	1258.78	1491.18
36	FeI_P	7	1350.95	1600.36
41	FeI_B	7	196.359	232.609
42	FeI_B	7	198.244	234.843
43	FeI_B	7	136.907	162.182
44	FeI_B	7	193.989	229.802
49	Fe0	7	6.74267	9.47504
50	Fe0	7	5.67973	7.98136
51	Fe0	7	5.55479	7.80579
52	Fe0	7	6.2564	8.79172
57	Fe0_P	7	1840.23	2096.83
58	Fe0_P	7	1591.85	1813.82
59	Fe0_P	7	1725.73	1966.36
60	Fe0_P	7	1648.15	1877.97
65	Fe0_B	7	277.449	316.136
66	Fe0_B	7	118.464	134.983
68	Fe0_B	7	204.578	233.105
73	H2O	7	1.43968
74	H2O	7	1.49244
75	H2O	7	0.735254
76	H2O	7	0.567187
1	FeII	10	10.1391	16.5495
2	FeII	10	7.1987	11.75
3	FeII	10	8.05326	13.1449
4	FeII	10	6.01927	9.8249
9	FeII_P	10	1360.68	1747.48
10	FeII_P	10	1526.91	1960.96
11	FeII_P	10	1538.73	1976.13
12	FeII_P	10	1430.69	1837.38
17	FeII_B	10	155.326	199.48
18	FeII_B	10	144.236	185.237
20	FeII_B	10	175.26	225.08
25	FeI	10	46.2417	68.1874
26	FeI	10	7.20611	10.626
27	FeI	10	5.7608	8.49479
28	FeI	10	6.10375	9.0005
33	FeI_P	10	1877.46	2224.07
34	FeI_P	10	2010.57	2381.76
35	FeI_P	10	2094.57	2481.25
36	FeI_P	10	2127.57	2520.35
41	FeI_B	10	255.885	303.125
42	FeI_B	10	223.259	264.476
43	FeI_B	10	150.467	178.246
44	FeI_B	10	201.334	238.503
49	Fe0	10	7.53928	10.5945
50	Fe0	10	5.6698	7.9674
51	Fe0	10	6.16155	8.65843
52	Fe0	10	6.74785	9.48233
57	Fe0_P	10	2808.6	3200.24
58	Fe0_P	10	2827.58	3221.86
59	Fe0_P	10	3017.88	3438.7
60	Fe0_P	10	2874.65	3275.49
65	Fe0_B	10	304.932	347.452
66	Fe0_B	10	158.353	180.434
68	Fe0_B	10	259.644	295.849
73	H2O	10	1.4047
74	H2O	10	1.65102
75	H2O	10	2.70952
76	H2O	10	0.932813
1	FeII	14	6.97016	11.377
2	FeII	14	5.06037	8.25974
3	FeII	14	5.06185	8.26216
4	FeII	14	4.56714	7.45467
9	FeII_P	14	2352.65	3021.43
10	FeII_P	14	2458.46	3157.32
11	FeII_P	14	2513.97	3228.61
12	FeII_P	14	2505.26	3217.42
17	FeII_B	14	176.162	226.239
18	FeII_B	14	128.752	165.351
20	FeII_B	14	163.203	209.596
25	FeI	14	6.49294	9.5744
26	FeI	14	5.97184	8.806
27	FeI	14	4.9341	7.27576
28	FeI	14	5.09772	7.51703
33	FeI_P	14	3062.32	3627.67
34	FeI_P	14	3207.24	3799.34
35	FeI_P	14	3338.1	3954.36
36	FeI_P	14	3340.03	3956.64
41	FeI_B	14	237.39	281.216
42	FeI_B	14	197.758	234.267
43	FeI_B	14	134.526	159.362
44	FeI_B	14	182.978	216.759
49	Fe0	14	4.63739	6.51663
50	Fe0	14	5.46735	7.68291
51	Fe0	14	5.74894	8.07862
52	Fe0	14	5.35945	7.53129
57	Fe0_P	14	5764.47	6568.27
58	Fe0_P	14	4916.48	5602.03
59	Fe0_P	14	5256.25	5989.18
60	Fe0_P	14	5287.94	6025.29
65	Fe0_B	14	411.271	468.619
66	Fe0_B	14	216.695	246.911
68	Fe0_B	14	281.025	320.211
73	H2O	14	1.48562
74	H2O	14	1.51704
75	H2O	14	1.26361
76	H2O	14	11.6179
1	FeII	17	5.98548	9.76974
2	FeII	17	5.78718	9.44607
3	FeII	17	5.35767	8.74501
4	FeII	17	5.53315	9.03143
9	FeII_P	17	3437.83	4415.09
10	FeII_P	17	3586.53	4606.06
11	FeII_P	17	3464.62	4449.5
12	FeII_P	17	3592.3	4613.48
17	FeII_B	17	146.852	188.597
18	FeII_B	17	120.429	154.663
20	FeII_B	17	141.386	181.578
25	FeI	17	7.55291	11.1374
26	FeI	17	7.14653	10.5382
27	FeI	17	5.15018	7.59439
28	FeI	17	7.13052	10.5146
33	FeI_P	17	4676.87	5540.3
34	FeI_P	17	4786.26	5669.88
35	FeI_P	17	4995.48	5917.72
36	FeI_P	17	4920.63	5829.06
41	FeI_B	17	213.57	252.998
42	FeI_B	17	180.437	213.748
43	FeI_B	17	126.943	150.379
44	FeI_B	17	167.176	198.039
49	Fe0	17	5.53611	7.77955
50	Fe0	17	5.36153	7.53421
51	Fe0	17	5.8924	8.28022
52	Fe0	17	5.58443	7.84744
57	Fe0_P	17	7125.79	8119.41
58	Fe0_P	17	6611.02	7532.86
59	Fe0_P	17	6843.31	7797.53
60	Fe0_P	17	6956.17	7926.14
65	Fe0_B	17	549.702	626.352
66	Fe0_B	17	326.674	372.225
68	Fe0_B	17	315.599	359.606
73	H2O	17	2.17034
74	H2O	17	2.11254
75	H2O	17	2.45312
76	H2O	17	2.38583
1	FeII	21	4.69341	7.66078
2	FeII	21	0.763561	1.24632
3	FeII	21	0.759411	1.23954
4	FeII	21	0.439581	0.717502
9	FeII_P	21	1575.19	2022.96
10	FeII_P	21	1749.99	2247.45
11	FeII_P	21	1682.27	2160.48
12	FeII_P	21	1690.95	2171.63
17	FeII_B	21	93.4793	120.052
18	FeII_B	21	7.49778	9.62914
20	FeII_B	21	4.96759	6.37971
25	FeI	21	1.03745	1.52981
26	FeI	21	0.727695	1.07305
27	FeI	21	0.587492	0.866307
28	FeI	21	0.689754	1.0171
33	FeI_P	21	2082.58	2467.05
34	FeI_P	21	2288.78	2711.32
35	FeI_P	21	2288.67	2711.19
36	FeI_P	21	2369.14	2806.52
41	FeI_B	21	27.3317	32.3775
42	FeI_B	21	11.8536	14.0419
43	FeI_B	21	10.4687	12.4014
44	FeI_B	21	16.0007	18.9547
49	Fe0	21	27.5333	38.6907
50	Fe0	21	1.83154	2.57374
51	Fe0	21	1.14416	1.60781
52	Fe0	21	0.892797	1.25459
57	Fe0_P	21	3548.28	4043.06
58	Fe0_P	21	3902.21	4446.34
59	Fe0_P	21	3875.28	4415.65
60	Fe0_P	21	3638.3	4145.62
65	Fe0_B	21	183.907	209.551
66	Fe0_B	21	231.278	263.527
68	Fe0_B	21	65.2611	74.361
73	H2O	21	0.391266
74	H2O	21	4.62583
75	H2O	21	0.509535
76	H2O	21	0.621875
1	FeII	24	1.01107	1.6503
2	FeII	24	1.30955	2.13751
3	FeII	24	0.900504	1.46984
4	FeII	24	0.822547	1.3426
9	FeII_P	24	2677.62	3438.77
10	FeII_P	24	3373.98	4333.09
11	FeII_P	24	2742.78	3522.46
12	FeII_P	24	2912.55	3740.49
17	FeII_B	24	13.2707	17.0431
18	FeII_B	24	5.50114	7.06493
20	FeII_B	24	8.79814	11.2992
25	FeI	24	0.891612	1.31476
26	FeI	24	1.26569	1.86636
27	FeI	24	1.69074	2.49315
28	FeI	24	1.08843	1.60499
33	FeI_P	24	3927.23	4652.26
34	FeI_P	24	4284.21	5075.13
35	FeI_P	24	4362.17	5167.49
36	FeI_P	24	4398.76	5210.83
41	FeI_B	24	32.4422	38.4315
42	FeI_B	24	20.8702	24.7231
43	FeI_B	24	20.7193	24.5444
44	FeI_B	24	32.6645	38.6948
49	Fe0	24	31.6223	44.4368
50	Fe0	24	2.09831	2.94862
51	Fe0	24	1.47377	2.07099
52	Fe0	24	1.223	1.71861
57	Fe0_P	24	6164.02	7023.53
58	Fe0_P	24	6965.34	7936.59
59	Fe0_P	24	6866.12	7823.53
60	Fe0_P	24	7020	7998.87
65	Fe0_B	24	183.529	209.12
66	Fe0_B	24	329.84	375.833
68	Fe0_B	24	154.743	176.32
73	H2O	24	1.24405
74	H2O	24	1.84725
75	H2O	24	1.78767
76	H2O	24	0.456773
1	FeII	28	6.4627	10.5487
2	FeII	28	2.03606	3.32335
3	FeII	28	0.940224	1.53467
4	FeII	28	1.04249	1.70159
9	FeII_P	28	4207.23	5403.21
10	FeII_P	28	5150.25	6614.29
11	FeII_P	28	4257.17	5467.34
12	FeII_P	28	4488.73	5764.72
17	FeII_B	28	28.3354	36.3901
18	FeII_B	28	9.67079	12.4199
20	FeII_B	28	11.719	15.0503
25	FeI	28	0.909693	1.34142
26	FeI	28	1.37121	2.02197
27	FeI	28	2.28772	3.37344
28	FeI	28	1.24227	1.83183
33	FeI_P	28	6670.03	7901.42
34	FeI_P	28	7168.54	8491.96
35	FeI_P	28	7110.85	8423.61
36	FeI_P	28	7196.37	8524.93
41	FeI_B	28	45.1906	53.5335
42	FeI_B	28	29.6508	35.1248
43	FeI_B	28	33.6711	39.8873
44	FeI_B	28	49.3407	58.4497
49	Fe0	28	1.27399	1.79025
50	Fe0	28	1.39581	1.96144
51	Fe0	28	1.70082	2.39005
52	Fe0	28	1.19218	1.67529
57	Fe0_P	28	11126.9	12678.4
58	Fe0_P	28	12176.4	13874.2
59	Fe0_P	28	12472.2	14211.3
60	Fe0_P	28	12210	13912.5
65	Fe0_B	28	278.231	317.027
66	Fe0_B	28	528.808	602.545
68	Fe0_B	28	148.526	169.237
73	H2O	28	1.66822
74	H2O	28	1.02648
75	H2O	28	0.375259
76	H2O	28	0.800316

## Sheet: B HeadspaceCH4_anoxic
Sample ID	Group	Day	Concentration [ppm]	ppm/ gC
5	FeII	2	17.6753	28.8503
6	FeII	2	24.6401	40.2186
7	FeII	2	10.5886	17.2832
8	FeII	2	24.0744	39.2952
13	FeII_P	2	202.855	260.52
14	FeII_P	2	193.201	248.122
15	FeII_P	2	213.499	274.189
16	FeII_P	2	198.293	254.661
21	FeII_B	2	58.7189	75.4107
22	FeII_B	2	49.9177	64.1076
23	FeII_B	2	70.84	90.9774
24	FeII_B	2	64.5046	82.8411
29	FeI	2	19.9503	29.4184
30	FeI	2	19.7042	29.0556
32	FeI	2	16.1633	23.8342
37	FeI_P	2	286.093	338.911
38	FeI_P	2	311.154	368.597
39	FeI_P	2	353.655	418.945
40	FeI_P	2	311.661	369.198
45	FeI_B	2	153.966	182.391
46	FeI_B	2	128.647	152.398
47	FeI_B	2	146.29	173.297
48	FeI_B	2	107.849	127.76
53	Fe0	2	41.6228	58.4899
54	Fe0	2	17.5604	24.6765
55	Fe0	2	34.2307	48.1022
56	Fe0	2	25.6518	36.0468
61	Fe0_P	2	448.762	511.337
62	Fe0_P	2	470.194	535.757
63	Fe0_P	2	464.245	528.979
64	Fe0_P	2	596.561	679.745
69	Fe0_B	2	274.49	312.765
70	Fe0_B	2	208.643	237.736
71	Fe0_B	2	235.347	268.164
72	Fe0_B	2	221.964	252.914
77	H2O	2	1.56536
78	H2O	2	3.48642
79	H2O	2	2.47075
80	H2O	2	3.00163
5	FeII	8	22.6771	37.0145
6	FeII	8	24.7603	40.4148
7	FeII	8	12.4941	20.3934
8	FeII	8	24.9353	40.7005
13	FeII_P	8	810.629	1041.06
14	FeII_P	8	754.191	968.583
15	FeII_P	8	1035.92	1330.39
16	FeII_P	8	769.442	988.169
21	FeII_B	8	373.225	479.321
22	FeII_B	8	431.4	554.033
23	FeII_B	8	513.535	659.515
24	FeII_B	8	352.243	452.373
29	FeI	8	20.4845	30.2062
30	FeI	8	14.4257	21.272
32	FeI	8	14.2428	21.0023
37	FeI_P	8	1365.46	1617.54
38	FeI_P	8	1401.92	1660.73
39	FeI_P	8	1372.98	1626.46
40	FeI_P	8	1368.34	1620.96
45	FeI_B	8	821.729	973.432
46	FeI_B	8	495.681	587.191
47	FeI_B	8	515.593	610.779
48	FeI_B	8	635.531	752.86
53	Fe0	8	57.5911	80.929
54	Fe0	8	18.4073	25.8666
55	Fe0	8	36.4517	51.2233
56	Fe0	8	31.0349	43.6114
61	Fe0_P	8	1803.62	2055.12
62	Fe0_P	8	1865.99	2126.18
63	Fe0_P	8	1850.68	2108.74
64	Fe0_P	8	2145.1	2444.22
69	Fe0_B	8	1565.85	1784.19
70	Fe0_B	8	1092.54	1244.88
71	Fe0_B	8	1078.63	1229.03
72	Fe0_B	8	776.615	884.906
77	H2O	8	1.21796
78	H2O	8	0.807134
79	H2O	8	0.707539
80	H2O	8	0.59342
5	FeII	11	56.5797	92.3517
6	FeII	11	22.8422	37.284
7	FeII	11	11.8153	19.2855
8	FeII	11	24.1974	39.496
13	FeII_P	11	1386.8	1781.02
14	FeII_P	11	1342.06	1723.57
15	FeII_P	11	1488.57	1911.72
16	FeII_P	11	1376.8	1768.18
21	FeII_B	11	515.787	662.408
22	FeII_B	11	708.258	909.592
23	FeII_B	11	759.411	975.286
24	FeII_B	11	452.613	581.276
29	FeI	11	62.9526	92.8291
30	FeI	11	18.8919	27.8578
32	FeI	11	14.6185	21.5563
37	FeI_P	11	2143.74	2539.5
38	FeI_P	11	2173.1	2574.28
39	FeI_P	11	2091.23	2477.3
40	FeI_P	11	2133.69	2527.6
45	FeI_B	11	1066.86	1263.82
46	FeI_B	11	666.356	789.375
47	FeI_B	11	853.848	1011.48
48	FeI_B	11	910.641	1078.76
53	Fe0	11	41.2489	57.9644
54	Fe0	11	17.5915	24.7203
55	Fe0	11	37.1095	52.1476
56	Fe0	11	28.408	39.9199
61	Fe0_P	11	3013.17	3433.32
62	Fe0_P	11	3066.69	3494.31
63	Fe0_P	11	3223.51	3672.99
64	Fe0_P	11	3417.67	3894.23
69	Fe0_B	11	2235.2	2546.88
70	Fe0_B	11	1713.67	1952.62
71	Fe0_B	11	1444.46	1645.87
72	Fe0_B	11	1015.3	1156.87
77	H2O	11	1.09554
78	H2O	11	0.726806
79	H2O	11	1.02352
80	H2O	11	0.813062
5	FeII	15	24.2025	39.5042
6	FeII	15	21.2345	34.6598
7	FeII	15	12.0216	19.6222
8	FeII	15	24.0406	39.2401
13	FeII_P	15	2653.46	3407.75
14	FeII_P	15	2398.95	3080.89
15	FeII_P	15	2584.91	3319.71
16	FeII_P	15	2253.46	2894.04
21	FeII_B	15	731.629	939.607
22	FeII_B	15	994.405	1277.08
23	FeII_B	15	1077.89	1384.3
24	FeII_B	15	637.735	819.022
29	FeI	15	18.9479	27.9404
30	FeI	15	13.8072	20.36
32	FeI	15	13.828	20.3906
37	FeI_P	15	3656.36	4331.38
38	FeI_P	15	3563.08	4220.88
39	FeI_P	15	3473.37	4114.6
40	FeI_P	15	3492.7	4137.51
45	FeI_B	15	1519.29	1799.78
46	FeI_B	15	925.764	1096.67
47	FeI_B	15	878.524	1040.71
48	FeI_B	15	1294.23	1533.16
53	Fe0	15	42.7209	60.0329
54	Fe0	15	16.1943	22.7567
55	Fe0	15	33.343	46.8547
56	Fe0	15	29.8145	41.8963
61	Fe0_P	15	5781.73	6587.93
62	Fe0_P	15	6040.42	6882.7
63	Fe0_P	15	5999.91	6836.53
64	Fe0_P	15	6508.47	7416.01
69	Fe0_B	15	3792.6	4321.44
70	Fe0_B	15	3033.34	3456.31
71	Fe0_B	15	2386.75	2719.55
72	Fe0_B	15	1632.9	1860.59
77	H2O	15	5.26905
78	H2O	15	2.90011
79	H2O	15	2.75931
80	H2O	15	3.14435
5	FeII	18	21.1405	34.5064
6	FeII	18	21.0617	34.3777
7	FeII	18	11.8408	19.3271
8	FeII	18	23.3529	38.1176
13	FeII_P	18	4142.98	5320.69
14	FeII_P	18	4066.03	5221.86
15	FeII_P	18	4226.02	5427.33
16	FeII_P	18	3971.68	5100.69
21	FeII_B	18	939.162	1206.13
22	FeII_B	18	1233.44	1584.07
23	FeII_B	18	1323.78	1700.08
24	FeII_B	18	790.402	1015.09
29	FeI	18	22.488	33.1605
30	FeI	18	13.6697	20.1572
32	FeI	18	13.5449	19.9731
37	FeI_P	18	5238.44	6205.53
38	FeI_P	18	5123.95	6069.9
39	FeI_P	18	4977.63	5896.57
40	FeI_P	18	5096.56	6037.46
45	FeI_B	18	1772.23	2099.41
46	FeI_B	18	1119.36	1326.02
47	FeI_B	18	1110.48	1315.5
48	FeI_B	18	1594.02	1888.31
53	Fe0	18	36.907	51.8631
54	Fe0	18	15.5107	21.7962
55	Fe0	18	31.1919	43.832
56	Fe0	18	27.8996	39.2056
61	Fe0_P	18	8541.78	9732.84
62	Fe0_P	18	8750.84	9971.05
63	Fe0_P	18	9264.15	10555.9
64	Fe0_P	18	9435.08	10750.7
69	Fe0_B	18	5533.64	6305.25
70	Fe0_B	18	4242.61	4834.2
71	Fe0_B	18	3564.87	4061.95
72	Fe0_B	18	2216.78	2525.89
77	H2O	18	7.75447
78	H2O	18	2.97392
79	H2O	18	2.35797
80	H2O	18	0.894576
5	FeII	22	59.8139	97.6306
6	FeII	22	4.67266	7.62691
7	FeII	22	4.58255	7.47983
8	FeII	22	5.68729	9.28302
13	FeII_P	22	1826.7	2345.97
14	FeII_P	22	1705.91	2190.84
15	FeII_P	22	1590.67	2042.84
16	FeII_P	22	1856.97	2384.84
21	FeII_B	22	368.692	473.499
22	FeII_B	22	339.145	435.553
23	FeII_B	22	345.309	443.469
24	FeII_B	22	371.901	477.62
29	FeI	22	3.06462	4.51905
30	FeI	22	1.44353	2.12862
32	FeI	22	1.06501	1.57046
37	FeI_P	22	2155.92	2553.94
38	FeI_P	22	2315.78	2743.3
39	FeI_P	22	2614.28	3096.92
40	FeI_P	22	3023.89	3582.15
45	FeI_B	22	540.443	640.217
46	FeI_B	22	392.106	464.494
47	FeI_B	22	394.743	467.618
48	FeI_B	22	411.56	487.541
53	Fe0	22	3.74311	5.25995
54	Fe0	22	1.70378	2.39422
55	Fe0	22	2.14781	3.01818
56	Fe0	22	2.14277	3.0111
61	Fe0_P	22	5842.8	6657.52
62	Fe0_P	22	5842.8	6657.52
63	Fe0_P	22	5520.2	6289.93
64	Fe0_P	22	6679.18	7610.53
69	Fe0_B	22	3399.42	3873.43
70	Fe0_B	22	2682.19	3056.19
71	Fe0_B	22	2380.93	2712.93
72	Fe0_B	22	1835.55	2091.5
77	H2O	22	0.377334
78	H2O	22	0.547179
79	H2O	22	0.966308
80	H2O	22	0.773343
5	FeII	25	60.423	98.6249
6	FeII	25	3.90495	6.37382
7	FeII	25	2.9259	4.77577
8	FeII	25	3.35007	5.46811
13	FeII_P	25	3049.86	3916.83
14	FeII_P	25	2771.56	3559.42
15	FeII_P	25	2741.67	3521.03
16	FeII_P	25	2935.24	3769.64
21	FeII_B	25	602.588	773.884
22	FeII_B	25	554.419	712.021
23	FeII_B	25	563.058	723.116
24	FeII_B	25	598.136	768.166
29	FeI	25	4.39048	6.47414
30	FeI	25	1.90238	2.80523
32	FeI	25	3.25936	4.80621
37	FeI_P	25	3965.01	4697.01
38	FeI_P	25	4122.91	4884.07
39	FeI_P	25	4280.55	5070.81
40	FeI_P	25	5015.82	5941.81
45	FeI_B	25	868.73	1029.11
46	FeI_B	25	594.144	703.832
47	FeI_B	25	599.086	709.686
48	FeI_B	25	680.683	806.347
53	Fe0	25	8.59036	12.0715
54	Fe0	25	2.88262	4.05076
55	Fe0	25	3.46863	4.87424
56	Fe0	25	3.28426	4.61516
61	Fe0_P	25	12974.3	14783.5
62	Fe0_P	25	13760.8	15679.6
63	Fe0_P	25	13476.2	15355.3
64	Fe0_P	25	13941	15885
69	Fe0_B	25	6614.69	7537.05
70	Fe0_B	25	5443.91	6203.01
71	Fe0_B	25	5059.81	5765.34
72	Fe0_B	25	3905.46	4450.04
77	H2O	25	0.679973
78	H2O	25	0.671969
79	H2O	25	1.14475
80	H2O	25	0.418536
5	FeII	29	11.2172	18.3091
6	FeII	29	10.6617	17.4025
7	FeII	29	2.11195	3.4472
8	FeII	29	5.24385	8.55923
13	FeII_P	29	4448.42	5712.96
14	FeII_P	29	4586.29	5890.02
15	FeII_P	29	4523.65	5809.57
16	FeII_P	29	4319.52	5547.41
21	FeII_B	29	849.887	1091.48
22	FeII_B	29	790.992	1015.84
23	FeII_B	29	759.66	975.606
24	FeII_B	29	778.195	999.41
29	FeI	29	4.41241	6.50648
30	FeI	29	3.5294	5.2044
32	FeI	29	2.29365	3.38218
37	FeI_P	29	7005.99	8299.4
38	FeI_P	29	7456.43	8833
39	FeI_P	29	7771.96	9206.78
40	FeI_P	29	7402.75	8769.41
45	FeI_B	29	1506.76	1784.93
46	FeI_B	29	859.909	1018.66
47	FeI_B	29	858.849	1017.4
48	FeI_B	29	1018.79	1206.88
53	Fe0	29	3.97817	5.59026
54	Fe0	29	3.81899	5.36658
55	Fe0	29	4.29681	6.03803
56	Fe0	29	5.60162	7.8716
61	Fe0_P	29	25611.2	29182.4
62	Fe0_P	29	24706.8	28151.9
63	Fe0_P	29	27263.6	31065.2
64	Fe0_P	29	26195.1	29847.7
69	Fe0_B	29	12430.7	14164
70	Fe0_B	29	10053.4	11455.2
71	Fe0_B	29	9147.88	10423.5
72	Fe0_B	29	7421.98	8456.9
77	H2O	29	1.77285
78	H2O	29	2.07697
79	H2O	29	3.26114
80	H2O	29	0.864935

## Sheet: C HeadspaceCO2_oxic
Sample ID	Group	Day	Concentration [ppm]	ppm/ gC
1	FeII	1	586.661	957.572
2	FeII	1	599.368	978.313
3	FeII	1	503.49	821.818
4	FeII	1	713.086	1163.93
9	FeII_P	1	11571.4	14860.7
10	FeII_P	1	6362.64	8171.33
11	FeII_P	1	9804.3	12591.3
12	FeII_P	1	11452.2	14707.6
17	FeII_B	1	9064.39	11641.1
18	FeII_B	1	3647.61	4684.5
20	FeII_B	1	5524.72	7095.21
25	FeI	1	1224.94	1806.27
26	FeI	1	1116	1645.64
27	FeI	1	1130.22	1666.61
28	FeI	1	1029.65	1518.31
33	FeI_P	1	18744.6	22205.1
34	FeI_P	1	16267.6	19270.9
35	FeI_P	1	14943	17701.7
36	FeI_P	1	14637.4	17339.7
41	FeI_B	1	8465.61	10028.5
42	FeI_B	1	7534.66	8925.67
43	FeI_B	1	6349.02	7521.15
44	FeI_B	1	8029.18	9511.49
49	Fe0	1	2748.01	3861.61
50	Fe0	1	2787.92	3917.69
51	Fe0	1	2351.77	3304.79
52	Fe0	1	2572	3614.27
57	Fe0_P	1	18823.1	21447.8
58	Fe0_P	1	21222.5	24181.7
59	Fe0_P	1	22009.9	25079
60	Fe0_P	1	27325.8	31136.1
65	Fe0_B	1	13970.9	15919
66	Fe0_B	1	13434.1	15307.4
68	Fe0_B	1	10383	11830.9
73	H2O	1	0
74	H2O	1	81.5779
75	H2O	1	0
76	H2O	1	0
1	FeII	7	1462.93	2387.86
2	FeII	7	1511.31	2466.82
3	FeII	7	1344.44	2194.45
4	FeII	7	1204.37	1965.82
9	FeII_P	7	14910.8	19149.5
10	FeII_P	7	14207.8	18246.6
11	FeII_P	7	17126.6	21995.1
12	FeII_P	7	15845.7	20350.1
17	FeII_B	7	14870.5	19097.7
18	FeII_B	7	10471.1	13447.7
20	FeII_B	7	11024.2	14158
25	FeI	7	2170.2	3200.15
26	FeI	7	1897.17	2797.54
27	FeI	7	1639.49	2417.57
28	FeI	7	1505.01	2219.27
33	FeI_P	7	28911.5	34248.9
34	FeI_P	7	26644.9	31564
35	FeI_P	7	20666	24481.3
36	FeI_P	7	20489.3	24272
41	FeI_B	7	13313.5	15771.4
42	FeI_B	7	13114.6	15535.8
43	FeI_B	7	14746.5	17468.9
44	FeI_B	7	18076.7	21413.9
49	Fe0	7	3990.87	5608.12
50	Fe0	7	4541.64	6382.07
51	Fe0	7	3506.32	4927.2
52	Fe0	7	3507.2	4928.45
57	Fe0_P	7	36167	41210.1
58	Fe0_P	7	36167	41210.1
59	Fe0_P	7	36167	41210.1
60	Fe0_P	7	31021.1	35346.6
65	Fe0_B	7	24514	27932.2
66	Fe0_B	7	23445.6	26714.8
68	Fe0_B	7	17448.9	19882
73	H2O	7	0
74	H2O	7	0
75	H2O	7	0
76	H2O	7	0
1	FeII	10	1831.81	2989.95
2	FeII	10	1845.12	3011.67
3	FeII	10	1917.53	3129.87
4	FeII	10	1602.85	2616.24
9	FeII_P	10	20194.7	25935.4
10	FeII_P	10	18726.9	24050.3
11	FeII_P	10	27011.1	34689.4
12	FeII_P	10	22826.8	29315.7
17	FeII_B	10	21806.5	28005.3
18	FeII_B	10	15234.7	19565.4
20	FeII_B	10	17932.1	23029.6
25	FeI	10	2666.85	3932.51
26	FeI	10	3154.37	4651.39
27	FeI	10	3059.58	4511.61
28	FeI	10	3318.32	4893.16
33	FeI_P	10	36202.2	42885.6
34	FeI_P	10	28703.9	34003
35	FeI_P	10	26918.8	31888.4
36	FeI_P	10	29318.7	34731.3
41	FeI_B	10	23660.6	28028.7
42	FeI_B	10	22462.3	26609.2
43	FeI_B	10	16554.5	19610.7
44	FeI_B	10	19811.9	23469.4
49	Fe0	10	4529.79	6365.43
50	Fe0	10	4543.12	6384.15
51	Fe0	10	4917.87	6910.77
52	Fe0	10	4637.62	6516.95
57	Fe0_P	10	41070.8	46797.7
58	Fe0_P	10	60137.9	68523.5
59	Fe0_P	10	59697.9	68022.2
60	Fe0_P	10	52397.6	59703.9
65	Fe0_B	10	28112.7	32032.7
66	Fe0_B	10	32755.9	37323.3
68	Fe0_B	10	26251.7	29912.2
73	H2O	10	0
74	H2O	10	0
75	H2O	10	0
76	H2O	10	0
1	FeII	14	2580.58	4212.12
2	FeII	14	1801.9	2941.13
3	FeII	14	2125.55	3469.41
4	FeII	14	2018.56	3294.78
9	FeII_P	14	24239.2	31129.5
10	FeII_P	14	21246.9	27286.7
11	FeII_P	14	25738.7	33055.3
12	FeII_P	14	26814.3	34436.7
17	FeII_B	14	21506.7	27620.3
18	FeII_B	14	14830.9	19046.8
20	FeII_B	14	15036.8	19311.2
25	FeI	14	4169.31	6148
26	FeI	14	3545.21	5227.72
27	FeI	14	5072.81	7480.31
28	FeI	14	4473.14	6596.04
33	FeI_P	14	31021	36747.9
34	FeI_P	14	35505.6	42060.4
35	FeI_P	14	28715.1	34016.4
36	FeI_P	14	28054.4	33233.7
41	FeI_B	14	21590.6	25576.6
42	FeI_B	14	24658.9	29211.3
43	FeI_B	14	22395.6	26530.1
44	FeI_B	14	23918.8	28334.6
49	Fe0	14	6412.41	9010.95
50	Fe0	14	7185.49	10097.3
51	Fe0	14	6564.72	9224.99
52	Fe0	14	7428.61	10438.9
57	Fe0_P	14	62273.3	70956.7
58	Fe0_P	14	54379.2	61961.9
59	Fe0_P	14	47229.5	53815.2
60	Fe0_P	14	44901.5	51162.5
65	Fe0_B	14	36478.3	41564.8
66	Fe0_B	14	40936.4	46644.5
68	Fe0_B	14	31537.9	35935.5
73	H2O	14	0
74	H2O	14	0
75	H2O	14	0
76	H2O	14	0
1	FeII	17	3345.94	5461.38
2	FeII	17	2881.71	4703.65
3	FeII	17	3294.97	5378.19
4	FeII	17	2911.08	4751.58
9	FeII_P	17	29605.3	38021
10	FeII_P	17	26682.8	34267.8
11	FeII_P	17	26418.4	33928.2
12	FeII_P	17	30441.3	39094.8
17	FeII_B	17	25472.6	32713.6
18	FeII_B	17	18179.3	23347.1
20	FeII_B	17	18588.1	23872
25	FeI	17	4597.9	6780
26	FeI	17	3940.37	5810.42
27	FeI	17	4988.4	7355.83
28	FeI	17	4364.16	6435.34
33	FeI_P	17	35719.7	42314.1
34	FeI_P	17	34076.9	40368.1
35	FeI_P	17	32432.6	38420.2
36	FeI_P	17	30359.5	35964.3
41	FeI_B	17	28469.4	33725.3
42	FeI_B	17	27736.5	32857.1
43	FeI_B	17	25752.6	30506.9
44	FeI_B	17	26486.2	31375.9
49	Fe0	17	8154.95	11459.6
50	Fe0	17	8131.5	11426.7
51	Fe0	17	7994.39	11234
52	Fe0	17	6976.05	9803
57	Fe0_P	17	43504.1	49570.3
58	Fe0_P	17	56119.4	63944.6
59	Fe0_P	17	59209.9	67466.2
60	Fe0_P	17	55451.5	63183.6
65	Fe0_B	17	37743.8	43006.8
66	Fe0_B	17	36015.9	41038
68	Fe0_B	17	32967.1	37564.1
73	H2O	17	0
74	H2O	17	0
75	H2O	17	0
76	H2O	17	0
1	FeII	21	2130.2	3477.01
2	FeII	21	1893.28	3090.3
3	FeII	21	2916.1	4759.77
4	FeII	21	2184.86	3566.21
9	FeII_P	21	18643.4	23943.1
10	FeII_P	21	20219.1	25966.7
11	FeII_P	21	18162.3	23325.2
12	FeII_P	21	18395.4	23624.5
17	FeII_B	21	19351.4	24852.4
18	FeII_B	21	14855.1	19077.9
20	FeII_B	21	15153.3	19460.9
25	FeI	21	4673.03	6890.79
26	FeI	21	3632.5	5356.43
27	FeI	21	4148.38	6117.15
28	FeI	21	4471.84	6594.12
33	FeI_P	21	24711.8	29273.9
34	FeI_P	21	25651.3	30386.9
35	FeI_P	21	22656.1	26838.7
36	FeI_P	21	21663.1	25662.4
41	FeI_B	21	16084.4	19053.8
42	FeI_B	21	16115.9	19091.1
43	FeI_B	21	17014.7	20155.8
44	FeI_B	21	18142	21491.3
49	Fe0	21	6357.39	8933.64
50	Fe0	21	7070.77	9936.1
51	Fe0	21	5440.29	7644.88
52	Fe0	21	5846.81	8216.14
57	Fe0_P	21	45595.2	51953
58	Fe0_P	21	45862.4	52257.4
59	Fe0_P	21	37864	43143.8
60	Fe0_P	21	41059.7	46785.1
65	Fe0_B	21	29053.5	33104.7
66	Fe0_B	21	30240.3	34457
68	Fe0_B	21	24943.2	28421.3
73	H2O	21	0
74	H2O	21	0
75	H2O	21	0
76	H2O	21	0
1	FeII	24	3866.62	6311.25
2	FeII	24	3935.97	6424.45
3	FeII	24	3802.95	6207.33
4	FeII	24	3290.08	5370.21
9	FeII_P	24	19886.1	25539.1
10	FeII_P	24	23090.9	29654.8
11	FeII_P	24	18678.7	23988.5
12	FeII_P	24	19393.6	24906.5
17	FeII_B	24	21255.4	27297.6
18	FeII_B	24	16937.7	21752.6
20	FeII_B	24	20607.3	26465.3
25	FeI	24	6314.31	9310.99
26	FeI	24	5650.81	8332.6
27	FeI	24	4178.61	6161.72
28	FeI	24	4699.22	6929.41
33	FeI_P	24	27122.7	32129.9
34	FeI_P	24	27538.6	32622.7
35	FeI_P	24	25620.1	30349.9
36	FeI_P	24	31094.7	36835.2
41	FeI_B	24	20718.7	24543.6
42	FeI_B	24	21384.1	25332
43	FeI_B	24	22829.3	27044
44	FeI_B	24	25647.2	30382.1
49	Fe0	24	7202.32	10121
50	Fe0	24	8581.98	12059.7
51	Fe0	24	8658.16	12166.8
52	Fe0	24	6972.84	9798.49
57	Fe0_P	24	50173.7	57169.9
58	Fe0_P	24	47443.2	54058.7
59	Fe0_P	24	41351.4	47117.5
60	Fe0_P	24	47104.8	53673
65	Fe0_B	24	30694.2	34974.2
66	Fe0_B	24	31878.1	36323.2
68	Fe0_B	24	34501.4	39312.3
73	H2O	24	0
74	H2O	24	0
75	H2O	24	0
76	H2O	24	0
1	FeII	28	4439.02	7245.55
2	FeII	28	4074.22	6650.11
3	FeII	28	4122.96	6729.67
4	FeII	28	3533.05	5766.79
9	FeII_P	28	17632.9	22645.3
10	FeII_P	28	19788.2	25413.3
11	FeII_P	28	18054.8	23187.2
12	FeII_P	28	19902.9	25560.6
17	FeII_B	28	26661	34239.9
18	FeII_B	28	19385.8	24896.5
20	FeII_B	28	23863.3	30646.9
25	FeI	28	6325.32	9327.23
26	FeI	28	5794.29	8544.18
27	FeI	28	7632.95	11255.4
28	FeI	28	8244.18	12156.8
33	FeI_P	28	27014.4	32001.6
34	FeI_P	28	28364.1	33600.6
35	FeI_P	28	32106	38033.2
36	FeI_P	28	29071.2	34438.1
41	FeI_B	28	27574.7	32665.4
42	FeI_B	28	25542.2	30257.6
43	FeI_B	28	24958.1	29565.8
44	FeI_B	28	26056.5	30867
49	Fe0	28	7889.41	11086.5
50	Fe0	28	10038.2	14106
51	Fe0	28	9991.6	14040.6
52	Fe0	28	7667.98	10775.3
57	Fe0_P	28	57968.1	66051.2
58	Fe0_P	28	52850.1	60219.5
59	Fe0_P	28	60970.2	69471.9
60	Fe0_P	28	54926.2	62585.1
65	Fe0_B	28	34943.2	39815.6
66	Fe0_B	28	43229.4	49257.3
68	Fe0_B	28	40570.6	46227.8
73	H2O	28	0
74	H2O	28	0
75	H2O	28	0
76	H2O	28	0

## Sheet: D HeadspaceCO2_anoxic
Sample ID	Group	Day	Concentration [ppm]	ppm/ gC
5	FeII	2	0	0
6	FeII	2	300.96	491.239
7	FeII	2	241.036	393.429
8	FeII	2	50.596	82.5848
13	FeII_P	2	3855.96	4952.08
14	FeII_P	2	3249.63	4173.39
15	FeII_P	2	8235.35	10576.4
16	FeII_P	2	2794.61	3589.02
21	FeII_B	2	3160.78	4059.29
22	FeII_B	2	3373.61	4332.62
23	FeII_B	2	3408.23	4377.08
24	FeII_B	2	4511.61	5794.11
29	FeI	2	902.824	1331.29
30	FeI	2	737.833	1088
32	FeI	2	1157.96	1707.51
37	FeI_P	2	9856.44	11676.1
38	FeI_P	2	7577.66	8976.6
39	FeI_P	2	10698.1	12673.2
40	FeI_P	2	5208.24	6169.76
45	FeI_B	2	4804.61	5691.61
46	FeI_B	2	5368.63	6359.76
47	FeI_B	2	5890.9	6978.45
48	FeI_B	2	3770.07	4466.08
53	Fe0	2	1478.32	2077.38
54	Fe0	2	2518.09	3538.51
55	Fe0	2	2382.05	3347.34
56	Fe0	2	2046.59	2875.95
61	Fe0_P	2	15075.9	17178.1
62	Fe0_P	2	15530.6	17696.1
63	Fe0_P	2	18305.3	20857.8
64	Fe0_P	2	15397.2	17544.2
69	Fe0_B	2	9929.35	11313.9
70	Fe0_B	2	9103.65	10373.1
71	Fe0_B	2	8409.36	9581.96
72	Fe0_B	2	10464.2	11923.4
77	H2O	2	0
78	H2O	2	0
79	H2O	2	0
80	H2O	2	0
5	FeII	8	443.663	724.165
6	FeII	8	553.906	904.107
7	FeII	8	181.339	295.988
8	FeII	8	178.898	292.005
13	FeII_P	8	3183.07	4087.9
14	FeII_P	8	2854.97	3666.54
15	FeII_P	8	5495.4	7057.56
16	FeII_P	8	3210.64	4123.31
21	FeII_B	8	6417.9	8242.3
22	FeII_B	8	4059.17	5213.05
23	FeII_B	8	3256.57	4182.3
24	FeII_B	8	6551.63	8414.04
29	FeI	8	838.736	1236.79
30	FeI	8	1590.45	2345.26
32	FeI	8	1098.88	1620.39
37	FeI_P	8	6938.28	8219.19
38	FeI_P	8	7496.27	8880.19
39	FeI_P	8	7695.02	9115.64
40	FeI_P	8	5144.28	6093.99
45	FeI_B	8	5458.6	6466.34
46	FeI_B	8	7051.93	8353.83
47	FeI_B	8	8252.97	9776.59
48	FeI_B	8	5462.24	6470.65
53	Fe0	8	2632.84	3699.76
54	Fe0	8	2654.92	3730.78
55	Fe0	8	2259.78	3175.53
56	Fe0	8	1668.91	2345.22
61	Fe0_P	8	16032.4	18268
62	Fe0_P	8	17412.2	19840.2
63	Fe0_P	8	18698.8	21306.2
64	Fe0_P	8	16137	18387.1
69	Fe0_B	8	15958.4	18183.6
70	Fe0_B	8	12568.1	14320.6
71	Fe0_B	8	12843.6	14634.6
72	Fe0_B	8	16903.9	19261
77	H2O	8	0
78	H2O	8	0
79	H2O	8	0
80	H2O	8	0
5	FeII	11	1.38676	2.26352
6	FeII	11	179.487	292.967
7	FeII	11	0	0
8	FeII	11	0	0
13	FeII_P	11	2883.31	3702.94
14	FeII_P	11	2039.03	2618.65
15	FeII_P	11	3003.19	3856.89
16	FeII_P	11	2976.89	3823.12
21	FeII_B	11	3526.8	4529.34
22	FeII_B	11	2292.92	2944.72
23	FeII_B	11	2185.64	2806.94
24	FeII_B	11	4405.52	5657.86
29	FeI	11	852.854	1257.61
30	FeI	11	1009.07	1487.96
32	FeI	11	1818.2	2681.09
37	FeI_P	11	7548.77	8942.39
38	FeI_P	11	6428.77	7615.62
39	FeI_P	11	8057.1	9544.56
40	FeI_P	11	6577.95	7792.34
45	FeI_B	11	5786.34	6854.58
46	FeI_B	11	5054.73	5987.91
47	FeI_B	11	5317.98	6299.76
48	FeI_B	11	5668.64	6715.16
53	Fe0	11	2597	3649.39
54	Fe0	11	2412.02	3389.46
55	Fe0	11	1583.37	2225.01
56	Fe0	11	1780.6	2502.16
61	Fe0_P	11	26925.6	30680.1
62	Fe0_P	11	26122.4	29764.9
63	Fe0_P	11	22259.2	25363
64	Fe0_P	11	19839	22605.3
69	Fe0_B	11	19078.7	21739.1
70	Fe0_B	11	15049.8	17148.4
71	Fe0_B	11	12489.4	14230.9
72	Fe0_B	11	18828.1	21453.5
77	H2O	11	0
78	H2O	11	0
79	H2O	11	0
80	H2O	11	0
5	FeII	15	33.4971	54.6753
6	FeII	15	417.401	681.3
7	FeII	15	80.7948	131.877
8	FeII	15	0	0
13	FeII_P	15	2826.95	3630.56
14	FeII_P	15	2931.91	3765.36
15	FeII_P	15	3059.71	3929.48
16	FeII_P	15	2471.07	3173.51
21	FeII_B	15	2761.78	3546.87
22	FeII_B	15	2243.37	2881.08
23	FeII_B	15	2013.66	2586.07
24	FeII_B	15	2729.49	3505.39
29	FeI	15	1606.29	2368.62
30	FeI	15	1543.67	2276.27
32	FeI	15	1992.29	2937.81
37	FeI_P	15	5649.16	6692.09
38	FeI_P	15	5780.81	6848.03
39	FeI_P	15	6155.7	7292.14
40	FeI_P	15	5975.42	7078.58
45	FeI_B	15	5900.12	6989.37
46	FeI_B	15	4800.12	5686.29
47	FeI_B	15	6512.26	7714.52
48	FeI_B	15	5842.03	6920.55
53	Fe0	15	3199.49	4496.03
54	Fe0	15	2852.66	4008.66
55	Fe0	15	2573.91	3616.95
56	Fe0	15	2582.93	3629.63
61	Fe0_P	15	28049.4	31960.5
62	Fe0_P	15	29053.6	33104.9
63	Fe0_P	15	29030.4	33078.4
64	Fe0_P	15	22252.8	25355.7
69	Fe0_B	15	22622.4	25776.9
70	Fe0_B	15	21767.7	24803
71	Fe0_B	15	19598.6	22331.4
72	Fe0_B	15	21533.6	24536.3
77	H2O	15	0
78	H2O	15	0
79	H2O	15	0
80	H2O	15	0
5	FeII	18	326.956	533.672
6	FeII	18	666.565	1088
7	FeII	18	345.142	563.355
8	FeII	18	11.0793	18.0841
13	FeII_P	18	2329.38	2991.54
14	FeII_P	18	2385.9	3064.14
15	FeII_P	18	3872.1	4972.81
16	FeII_P	18	2916.51	3745.58
21	FeII_B	18	2268.37	2913.19
22	FeII_B	18	2836.6	3642.95
23	FeII_B	18	1573.42	2020.69
24	FeII_B	18	2232.65	2867.32
29	FeI	18	1368.68	2018.23
30	FeI	18	1565.64	2308.68
32	FeI	18	1550.17	2285.87
37	FeI_P	18	5056.63	5990.16
38	FeI_P	18	5170.42	6124.96
39	FeI_P	18	4532.62	5369.41
40	FeI_P	18	6474.1	7669.32
45	FeI_B	18	7366.9	8726.94
46	FeI_B	18	5472.1	6482.33
47	FeI_B	18	5612.44	6648.58
48	FeI_B	18	8823.04	10451.9
53	Fe0	18	2822.2	3965.86
54	Fe0	18	3601.49	5060.95
55	Fe0	18	2754.92	3871.31
56	Fe0	18	2606.83	3663.21
61	Fe0_P	18	23892.6	27224.2
62	Fe0_P	18	29457	33564.4
63	Fe0_P	18	30552.3	34812.5
64	Fe0_P	18	22497.4	25634.4
69	Fe0_B	18	21958.5	25020.4
70	Fe0_B	18	20365.1	23204.8
71	Fe0_B	18	16281.3	18551.5
72	Fe0_B	18	18898.3	21533.4
77	H2O	18	0
78	H2O	18	0
79	H2O	18	0
80	H2O	18	0
5	FeII	22	0	0
6	FeII	22	0	0
7	FeII	22	226.438	369.601
8	FeII	22	11.8153	19.2853
13	FeII_P	22	1917.64	2462.76
14	FeII_P	22	2063.13	2649.61
15	FeII_P	22	2743.62	3523.54
16	FeII_P	22	2073.09	2662.39
21	FeII_B	22	2027.28	2603.57
22	FeII_B	22	1323.84	1700.16
23	FeII_B	22	1311.61	1684.46
24	FeII_B	22	1762.77	2263.87
29	FeI	22	449.211	662.401
30	FeI	22	692.606	1021.31
32	FeI	22	282.178	416.095
37	FeI_P	22	4277.1	5066.72
38	FeI_P	22	4641.22	5498.06
39	FeI_P	22	4728.73	5601.72
40	FeI_P	22	3998.03	4736.13
45	FeI_B	22	4846.14	5740.81
46	FeI_B	22	4518.11	5352.22
47	FeI_B	22	5273.5	6247.06
48	FeI_B	22	4850.48	5745.96
53	Fe0	22	1533.57	2155.03
54	Fe0	22	1835.37	2579.12
55	Fe0	22	886.879	1246.27
56	Fe0	22	950.548	1335.74
61	Fe0_P	22	17337.7	19755.3
62	Fe0_P	22	18197.4	20734.9
63	Fe0_P	22	18491	21069.4
64	Fe0_P	22	17548.9	19995.9
69	Fe0_B	22	20465.5	23319.2
70	Fe0_B	22	18148.1	20678.6
71	Fe0_B	22	15124.6	17233.6
72	Fe0_B	22	16652.8	18974.8
77	H2O	22	0
78	H2O	22	0
79	H2O	22	0
80	H2O	22	0
5	FeII	25	0	0
6	FeII	25	163.767	267.307
7	FeII	25	127.808	208.613
8	FeII	25	0	0
13	FeII_P	25	2318.26	2977.26
14	FeII_P	25	2126.52	2731.02
15	FeII_P	25	2228.03	2861.38
16	FeII_P	25	1886.05	2422.19
21	FeII_B	25	2639.12	3389.33
22	FeII_B	25	1980.38	2543.34
23	FeII_B	25	1872.39	2404.65
24	FeII_B	25	2287.1	2937.24
29	FeI	25	1336.28	1970.47
30	FeI	25	661.515	975.462
32	FeI	25	421.758	621.918
37	FeI_P	25	5228.02	6193.19
38	FeI_P	25	5203.05	6163.62
39	FeI_P	25	5213.32	6175.77
40	FeI_P	25	4316.08	5112.89
45	FeI_B	25	5269.48	6242.31
46	FeI_B	25	5142.94	6092.4
47	FeI_B	25	5034.93	5964.46
48	FeI_B	25	4425.65	5242.69
53	Fe0	25	1748.94	2457.68
54	Fe0	25	2083.67	2928.05
55	Fe0	25	1806.29	2538.27
56	Fe0	25	1901.47	2672.01
61	Fe0_P	25	22570	25717.2
62	Fe0_P	25	24035.5	27387
63	Fe0_P	25	25837.9	29440.7
64	Fe0_P	25	21863.7	24912.3
69	Fe0_B	25	22879.1	26069.3
70	Fe0_B	25	22174.3	25266.3
71	Fe0_B	25	19330.6	22026.1
72	Fe0_B	25	21712.1	24739.7
77	H2O	25	0
78	H2O	25	0
79	H2O	25	0
80	H2O	25	0
5	FeII	29	0	0
6	FeII	29	0	0
7	FeII	29	0	0
8	FeII	29	0	0
13	FeII_P	29	2965.58	3808.59
14	FeII_P	29	2122.17	2725.43
15	FeII_P	29	2756.67	3540.3
16	FeII_P	29	2078.5	2669.34
21	FeII_B	29	2095.23	2690.83
22	FeII_B	29	1781.72	2288.2
23	FeII_B	29	1774.07	2278.37
24	FeII_B	29	1732.07	2224.44
29	FeI	29	1564.46	2306.94
30	FeI	29	405.603	598.097
32	FeI	29	414.209	610.787
37	FeI_P	29	6014.65	7125.04
38	FeI_P	29	5966.72	7068.26
39	FeI_P	29	5786.08	6854.28
40	FeI_P	29	5398.67	6395.35
45	FeI_B	29	6475.23	7670.66
46	FeI_B	29	5947.47	7045.47
47	FeI_B	29	5022.62	5949.87
48	FeI_B	29	4839.08	5732.45
53	Fe0	29	2099.65	2950.5
54	Fe0	29	1825.03	2564.6
55	Fe0	29	1627.86	2287.53
56	Fe0	29	1440.11	2023.7
61	Fe0_P	29	24023.8	27373.6
62	Fe0_P	29	23778.4	27094
63	Fe0_P	29	23596.3	26886.6
64	Fe0_P	29	20899.6	23813.8
69	Fe0_B	29	22905.8	26099.8
70	Fe0_B	29	23278.5	26524.5
71	Fe0_B	29	20926.8	23844.9
72	Fe0_B	29	21915.5	24971.4
77	H2O	29	0
78	H2O	29	0
79	H2O	29	0
80	H2O	29	0

## Sheet: E MicrobialSeq
otu name	Taxonomy	Percent Homology	evalue	bitscore	OTUcounts_SedFe_low	OTUcounts_SedFe_med	OTUcounts_SedFe_high	negative.control	OTU%_SedFe_low	OTU%_SedFe_med	OTU%_SedFe_high	negative.control	Enrichment
Zotu62	acidiferrobacter thiooxydans ;k__bacteria;p__proteobacteria;c__gammaproteobacteria;o__acidiferrobacterales;f__acidiferrobacteraceae;g__acidiferrobacter;s__acidiferrobacter thiooxydans; superkingdom__bacteria;	90.4206	4.08922e-161	572.954	783	179	527	426	0.409042	0.106737	0.200709	0.189493	0.0493359
Zotu1983	acidiferrobacter thiooxydans ;k__bacteria;p__proteobacteria;c__gammaproteobacteria;o__acidiferrobacterales;f__acidiferrobacteraceae;g__acidiferrobacter;s__acidiferrobacter thiooxydans; superkingdom__bacteria;	89.5105	1.73878e-159	568.446	12	44	0	0	0.00626884	0.026237	0	0	0.0108353
Zotu522	ferrimicrobium acidiphilum ;k__bacteria;p__actinobacteria;c__acidimicrobiia;o__acidimicrobiales;f__acidimicrobiaceae;g__ferrimicrobium;s__ferrimicrobium acidiphilum; superkingdom__bacteria;	92.5558	4.1112e-167	592.791	43	73	108	2	0.0224633	0.0435296	0.041132	0.00088964	0.0348187
Zotu702	ferrimicrobium acidiphilum ;k__bacteria;p__actinobacteria;c__acidimicrobiia;o__acidimicrobiales;f__acidimicrobiaceae;g__ferrimicrobium;s__ferrimicrobium acidiphilum; superkingdom__bacteria;	92.3267	7.43322e-164	581.971	17	3	159	1	0.00888086	0.00178889	0.0605555	0.00044482	0.0232969
Zotu2202	ferrimicrobium acidiphilum ;k__bacteria;p__actinobacteria;c__acidimicrobiia;o__acidimicrobiales;f__acidimicrobiaceae;g__ferrimicrobium;s__ferrimicrobium acidiphilum; superkingdom__bacteria;	92.3077	1.74813e-165	587.381	0	30	1	0	0	0.0178889	0.000380852	0	0.00608991
Zotu3041	ferriphaselus amnicola ;k__bacteria;p__proteobacteria;c__betaproteobacteria;o__nitrosomonadales;f__gallionellaceae;g__ferriphaselus;s__ferriphaselus amnicola; superkingdom__bacteria;	96.0187	0	694.682	22	1	1	0	0.0114929	0.000596296	0.000380852	0	0.00415667
Zotu44	aciditerrimonas ferrireducens ;k__bacteria;p__actinobacteria;c__acidimicrobiia;o__acidimicrobiales;f__acidimicrobiaceae;g__aciditerrimonas;s__aciditerrimonas ferrireducens; superkingdom__bacteria;	92.0988	2.60144e-163	580.168	327	1098	454	7	0.170826	0.654733	0.172907	0.00311374	0.329708
Zotu86	aciditerrimonas ferrireducens ;k__bacteria;p__actinobacteria;c__acidimicrobiia;o__acidimicrobiales;f__acidimicrobiaceae;g__aciditerrimonas;s__aciditerrimonas ferrireducens; superkingdom__bacteria;	93.0693	2.77011e-169	600.005	217	533	422	8	0.113362	0.317826	0.16072	0.00355856	0.193744
Zotu114	aciditerrimonas ferrireducens ;k__bacteria;p__actinobacteria;c__acidimicrobiia;o__acidimicrobiales;f__acidimicrobiaceae;g__aciditerrimonas;s__aciditerrimonas ferrireducens; superkingdom__bacteria;	93.8119	4.38955e-173	612.628	91	129	891	4	0.0475387	0.0769222	0.339339	0.00177928	0.152821
Zotu266	aciditerrimonas ferrireducens ;k__bacteria;p__actinobacteria;c__acidimicrobiia;o__acidimicrobiales;f__acidimicrobiaceae;g__aciditerrimonas;s__aciditerrimonas ferrireducens; superkingdom__bacteria;	88.4521	7.54006e-145	519.755	161	293	6	0	0.0841069	0.174715	0.00228511	0	0.0870356
Zotu325	aciditerrimonas ferrireducens ;k__bacteria;p__actinobacteria;c__acidimicrobiia;o__acidimicrobiales;f__acidimicrobiaceae;g__aciditerrimonas;s__aciditerrimonas ferrireducens; superkingdom__bacteria;	88.4521	7.54006e-145	519.755	64	158	164	1	0.0334338	0.0942147	0.0624598	0.00044482	0.0629246
Zotu321	aciditerrimonas ferrireducens ;k__bacteria;p__actinobacteria;c__acidimicrobiia;o__acidimicrobiales;f__acidimicrobiaceae;g__aciditerrimonas;s__aciditerrimonas ferrireducens; superkingdom__bacteria;	92.3267	6.10156e-165	586.479	108	146	103	1	0.0564196	0.0870592	0.0392278	0.00044482	0.0604574
Zotu336	aciditerrimonas ferrireducens ;k__bacteria;p__actinobacteria;c__acidimicrobiia;o__acidimicrobiales;f__acidimicrobiaceae;g__aciditerrimonas;s__aciditerrimonas ferrireducens; superkingdom__bacteria;	92.8218	1.17788e-167	595.496	131	36	246	3	0.0684348	0.0214666	0.0936897	0.00133446	0.0598626
Zotu357	aciditerrimonas ferrireducens ;k__bacteria;p__actinobacteria;c__acidimicrobiia;o__acidimicrobiales;f__acidimicrobiaceae;g__aciditerrimonas;s__aciditerrimonas ferrireducens; superkingdom__bacteria;	91.5842	3.16921e-162	576.561	190	75	88	2	0.0992566	0.0447222	0.033515	0.00088964	0.058275
Zotu552	aciditerrimonas ferrireducens ;k__bacteria;p__actinobacteria;c__acidimicrobiia;o__acidimicrobiales;f__acidimicrobiaceae;g__aciditerrimonas;s__aciditerrimonas ferrireducens; superkingdom__bacteria;	92.8218	1.17788e-167	594.595	0	1	223	0	0	0.000596296	0.0849301	0	0.0285088
Zotu809	aciditerrimonas ferrireducens ;k__bacteria;p__actinobacteria;c__acidimicrobiia;o__acidimicrobiales;f__acidimicrobiaceae;g__aciditerrimonas;s__aciditerrimonas ferrireducens; superkingdom__bacteria;	92.3267	5.02197e-166	589.185	49	85	1	0	0.0255978	0.0506851	0.000380852	0	0.0255546
Zotu908	aciditerrimonas ferrireducens ;k__bacteria;p__actinobacteria;c__acidimicrobiia;o__acidimicrobiales;f__acidimicrobiaceae;g__aciditerrimonas;s__aciditerrimonas ferrireducens; superkingdom__bacteria;	92.8218	1.17788e-167	594.595	14	0	116	0	0.00731365	0	0.0441789	0	0.0171642
Zotu868	aciditerrimonas ferrireducens ;k__bacteria;p__actinobacteria;c__acidimicrobiia;o__acidimicrobiales;f__acidimicrobiaceae;g__aciditerrimonas;s__aciditerrimonas ferrireducens; superkingdom__bacteria;	92.5743	1.43495e-166	590.988	11	36	59	0	0.00574644	0.0214666	0.0224703	0	0.0165611
Zotu959	aciditerrimonas ferrireducens ;k__bacteria;p__actinobacteria;c__acidimicrobiia;o__acidimicrobiales;f__acidimicrobiaceae;g__aciditerrimonas;s__aciditerrimonas ferrireducens; superkingdom__bacteria;	93.3168	2.27384e-170	603.611	24	5	71	0	0.0125377	0.00298148	0.0270405	0	0.0141866
Zotu1445	aciditerrimonas ferrireducens ;k__bacteria;p__actinobacteria;c__acidimicrobiia;o__acidimicrobiales;f__acidimicrobiaceae;g__aciditerrimonas;s__aciditerrimonas ferrireducens; superkingdom__bacteria;	95.5446	0	645.089	3	53	0	1	0.00156721	0.0316037	0	0.00044482	0.0106121
Zotu1405	aciditerrimonas ferrireducens ;k__bacteria;p__actinobacteria;c__acidimicrobiia;o__acidimicrobiales;f__acidimicrobiaceae;g__aciditerrimonas;s__aciditerrimonas ferrireducens; superkingdom__bacteria;	88.2064	9.18567e-144	515.246	19	20	26	2	0.00992566	0.0119259	0.00990216	0.00088964	0.00969494
Zotu1653	aciditerrimonas ferrireducens ;k__bacteria;p__actinobacteria;c__acidimicrobiia;o__acidimicrobiales;f__acidimicrobiaceae;g__aciditerrimonas;s__aciditerrimonas ferrireducens; superkingdom__bacteria;	93.0693	2.77011e-169	600.005	26	14	1	0	0.0135825	0.00834814	0.000380852	0	0.00743716
Zotu1645	aciditerrimonas ferrireducens ;k__bacteria;p__actinobacteria;c__acidimicrobiia;o__acidimicrobiales;f__acidimicrobiaceae;g__aciditerrimonas;s__aciditerrimonas ferrireducens; superkingdom__bacteria;	92.8218	1.17788e-167	594.595	24	18	0	2	0.0125377	0.0107333	0	0.00088964	0.00686736
Zotu1887	aciditerrimonas ferrireducens ;k__bacteria;p__actinobacteria;c__acidimicrobiia;o__acidimicrobiales;f__acidimicrobiaceae;g__aciditerrimonas;s__aciditerrimonas ferrireducens; superkingdom__bacteria;	92.5743	1.43495e-166	590.988	25	11	0	0	0.0130601	0.00655925	0	0	0.00653978
Zotu2319	aciditerrimonas ferrireducens ;k__bacteria;p__actinobacteria;c__acidimicrobiia;o__acidimicrobiales;f__acidimicrobiaceae;g__aciditerrimonas;s__aciditerrimonas ferrireducens; superkingdom__bacteria;	94.5545	1.99285e-177	627.055	14	19	0	0	0.00731365	0.0113296	0	0	0.00621442
Zotu2862	aciditerrimonas ferrireducens ;k__bacteria;p__actinobacteria;c__acidimicrobiia;o__acidimicrobiales;f__acidimicrobiaceae;g__aciditerrimonas;s__aciditerrimonas ferrireducens; superkingdom__bacteria;	91.3366	1.63728e-159	567.544	5	21	0	0	0.00261202	0.0125222	0	0	0.00504474
Zotu2738	aciditerrimonas ferrireducens ;k__bacteria;p__actinobacteria;c__acidimicrobiia;o__acidimicrobiales;f__acidimicrobiaceae;g__aciditerrimonas;s__aciditerrimonas ferrireducens; superkingdom__bacteria;	92.0792	6.11801e-165	585.578	3	20	1	0	0.00156721	0.0119259	0.000380852	0	0.00462466
Zotu2330	aciditerrimonas ferrireducens ;k__bacteria;p__actinobacteria;c__acidimicrobiia;o__acidimicrobiales;f__acidimicrobiaceae;g__aciditerrimonas;s__aciditerrimonas ferrireducens; superkingdom__bacteria;	91.791	3.85051e-161	572.954	24	0	0	0	0.0125377	0	0	0	0.00417923
Zotu2846	aciditerrimonas ferrireducens ;k__bacteria;p__actinobacteria;c__acidimicrobiia;o__acidimicrobiales;f__acidimicrobiaceae;g__aciditerrimonas;s__aciditerrimonas ferrireducens; superkingdom__bacteria;	93.5802	1.87151e-171	607.218	9	13	0	0	0.00470163	0.00775185	0	0	0.00415116
Zotu3190	aciditerrimonas ferrireducens ;k__bacteria;p__actinobacteria;c__acidimicrobiia;o__acidimicrobiales;f__acidimicrobiaceae;g__aciditerrimonas;s__aciditerrimonas ferrireducens; superkingdom__bacteria;	92.5743	1.43495e-166	590.988	5	8	0	0	0.00261202	0.00477037	0	0	0.00246079
Zotu2948	af282253.1 ferribacter thermoautotrophicus str. ka2 ;k__bacteria;p__firmicutes;c__thermolithobacteria;o__thermolithobacterales;f__thermolithobacteraceae;g__thermolithobacter;s__thermolithobacter ferrireducens;superkingdom__bacteria	82.0755	5.7086e-115	419.668	3	0	25	0	0.00156721	0	0.00952131	0	0.00369617
Zotu1165	af282254.1 ferribacter thermoautotrophicus ;k__bacteria;p__firmicutes;c__thermolithobacteria;o__thermolithobacterales;f__thermolithobacteraceae;g__thermolithobacter;s__thermolithobacter ferrireducens;superkingdom__bacteria	82.0755	8.47231e-113	412.454	24	30	48	1	0.0125377	0.0178889	0.0182809	0.00044482	0.015791
Zotu2014	af282254.1 ferribacter thermoautotrophicus ;k__bacteria;p__firmicutes;c__thermolithobacteria;o__thermolithobacterales;f__thermolithobacteraceae;g__thermolithobacter;s__thermolithobacter ferrireducens;superkingdom__bacteria	82.243	4.38877e-110	403.438	4	0	47	0	0.00208961	0	0.0179001	0	0.00666322
Zotu2181	af282254.1 ferribacter thermoautotrophicus ;k__bacteria;p__firmicutes;c__thermolithobacteria;o__thermolithobacterales;f__thermolithobacteraceae;g__thermolithobacter;s__thermolithobacter ferrireducens;superkingdom__bacteria	83.5714	5.00316e-122	443.112	0	0	28	0	0	0	0.0106639	0	0.00355462
Zotu1274	deferrisoma camini ;k__bacteria;p__proteobacteria;c__deltaproteobacteria;o__deltaproteobacteria;f__deltaproteobacteria;g__deferrisoma;s__deferrisoma camini;superkingdom__bacteria;subphylum__delta/epsilon subdivisions	81.0096	3.30575e-105	388.109	3	0	97	1	0.00156721	0	0.0369427	0.00044482	0.0123918
Zotu2003	deferrisoma camini ;k__bacteria;p__proteobacteria;c__deltaproteobacteria;o__deltaproteobacteria;f__deltaproteobacteria;g__deferrisoma;s__deferrisoma camini;superkingdom__bacteria;subphylum__delta/epsilon subdivisions	84.8341	1.23085e-129	469.261	21	15	0	0	0.0109705	0.00894444	0	0	0.0066383
Zotu2674	deferrisoma camini ;k__bacteria;p__proteobacteria;c__deltaproteobacteria;o__deltaproteobacteria;f__deltaproteobacteria;g__deferrisoma;s__deferrisoma camini;superkingdom__bacteria;subphylum__delta/epsilon subdivisions	84.7619	2.8124e-131	473.769	24	0	0	0	0.0125377	0	0	0	0.00417923
Zotu3116	deferrisoma camini ;k__bacteria;p__proteobacteria;c__deltaproteobacteria;o__deltaproteobacteria;f__deltaproteobacteria;g__deferrisoma;s__deferrisoma camini;superkingdom__bacteria;subphylum__delta/epsilon subdivisions	81.6425	1.83308e-108	398.027	10	1	0	0	0.00522403	0.000596296	0	0	0.00194011
Zotu2007	deferrisoma camini ;k__bacteria;p__proteobacteria;c__deltaproteobacteria;o__deltaproteobacteria;f__deltaproteobacteria;g__deferrisoma;s__deferrisoma camini;superkingdom__bacteria;subphylum__delta/epsilon subdivisions	79.0244	4.33704e-91	340.32	0	0	0	46	0	0	0	0.0204617	-0.0204617
Zotu1453	deferrisoma camini ;k__bacteria;p__proteobacteria;c__deltaproteobacteria;o__deltaproteobacteria;f__deltaproteobacteria;g__deferrisoma;s__deferrisoma camini;superkingdom__bacteria;subphylum__delta/epsilon subdivisions	79.0244	4.33704e-91	340.32	0	0	1	82	0	0	0.000380852	0.0364752	-0.0363483
Zotu577	geoalkalibacter ferrihydriticus ;k__bacteria;p__proteobacteria;c__deltaproteobacteria;o__desulfuromonadales;f__geobacteraceae;g__geoalkalibacter;s__geoalkalibacter ferrihydriticus;superkingdom__bacteria;subphylum__delta/epsilon subdivisions	86.1827	4.85954e-141	507.131	9	1	213	0	0.00470163	0.000596296	0.0811215	0	0.0288065
Zotu1298	geoalkalibacter ferrihydriticus ;k__bacteria;p__proteobacteria;c__deltaproteobacteria;o__desulfuromonadales;f__geobacteraceae;g__geoalkalibacter;s__geoalkalibacter ferrihydriticus;superkingdom__bacteria;subphylum__delta/epsilon subdivisions	86.1827	4.85954e-141	507.131	19	1	92	0	0.00992566	0.000596296	0.0350384	0	0.0151868
Zotu1415	geoalkalibacter ferrihydriticus ;k__bacteria;p__proteobacteria;c__deltaproteobacteria;o__desulfuromonadales;f__geobacteraceae;g__geoalkalibacter;s__geoalkalibacter ferrihydriticus;superkingdom__bacteria;subphylum__delta/epsilon subdivisions	85.4801	1.30399e-135	489.098	4	0	73	0	0.00208961	0	0.0278022	0	0.00996394
Zotu2908	geoalkalibacter ferrihydriticus ;k__bacteria;p__proteobacteria;c__deltaproteobacteria;o__desulfuromonadales;f__geobacteraceae;g__geoalkalibacter;s__geoalkalibacter ferrihydriticus;superkingdom__bacteria;subphylum__delta/epsilon subdivisions	85.4801	3.0667e-137	493.606	18	0	0	0	0.00940326	0	0	0	0.00313442
Zotu464	moorella humiferrea ;k__bacteria;p__firmicutes;c__clostridia;o__thermoanaerobacterales;f__thermoanaerobacteraceae;g__moorella;s__moorella humiferrea;superkingdom__bacteria	82.2542	2.85981e-112	410.651	94	15	215	0	0.0491059	0.00894444	0.0818832	0	0.0466445
Zotu1025	moorella humiferrea ;k__bacteria;p__firmicutes;c__clostridia;o__thermoanaerobacterales;f__thermoanaerobacteraceae;g__moorella;s__moorella humiferrea;superkingdom__bacteria	79.0865	5.5256e-96	356.55	29	24	44	1	0.0151497	0.0143111	0.0167575	0.00044482	0.0149613
Zotu1796	moorella humiferrea ;k__bacteria;p__firmicutes;c__clostridia;o__thermoanaerobacterales;f__thermoanaerobacteraceae;g__moorella;s__moorella humiferrea;superkingdom__bacteria	81.4904	1.48142e-109	401.634	14	1	35	0	0.00731365	0.000596296	0.0133298	0	0.00707992
Zotu2333	moorella humiferrea ;k__bacteria;p__firmicutes;c__clostridia;o__thermoanaerobacterales;f__thermoanaerobacteraceae;g__moorella;s__moorella humiferrea;superkingdom__bacteria	85.3365	1.00251e-130	471.966	16	14	0	0	0.00835845	0.00834814	0	0	0.00556886
Zotu3098	moorella humiferrea ;k__bacteria;p__firmicutes;c__clostridia;o__thermoanaerobacterales;f__thermoanaerobacteraceae;g__moorella;s__moorella humiferrea;superkingdom__bacteria	81.7746	2.88226e-112	410.651	23	7	0	0	0.0120153	0.00417407	0	0	0.00539645
Zotu2042	moorella humiferrea ;k__bacteria;p__firmicutes;c__clostridia;o__thermoanaerobacterales;f__thermoanaerobacteraceae;g__moorella;s__moorella humiferrea;superkingdom__bacteria	82.2115	2.35976e-113	414.258	8	0	29	0	0.00417923	0	0.0110447	0	0.00507465
Zotu2503	moorella humiferrea ;k__bacteria;p__firmicutes;c__clostridia;o__thermoanaerobacterales;f__thermoanaerobacteraceae;g__moorella;s__moorella humiferrea;superkingdom__bacteria	82.4519	5.52072e-115	420.57	9	17	0	0	0.00470163	0.010137	0	0	0.00494622
Zotu2148	moorella humiferrea ;k__bacteria;p__firmicutes;c__clostridia;o__thermoanaerobacterales;f__thermoanaerobacteraceae;g__moorella;s__moorella humiferrea;superkingdom__bacteria	81.4904	1.48142e-109	401.634	24	0	0	0	0.0125377	0	0	0	0.00417923
Zotu1420	u76364.1 thermoterrabacterium ferrireducens ;k__bacteria;p__firmicutes;c__clostridia;o__thermoanaerobacterales;f__thermoanaerobacteraceae;g__carboxydothermus;s__carboxydothermus ferrireducens;superkingdom__bacteria	84.7775	2.43136e-132	478.277	22	41	0	1	0.0114929	0.0244481	0	0.00044482	0.0115355
Zotu1043	"psychrosinus" fermentans ;k__bacteria;p__firmicutes;c__negativicutes;o__selenomonadales;f__sporomusaceae;g__psychrosinus;s__"psychrosinus" fermentans; superkingdom__bacteria;	98.8318	0	746.979	24	52	107	1	0.0125377	0.0310074	0.0407512	0.00044482	0.0276539
Zotu739	"psychrosinus" fermentans ;k__bacteria;p__firmicutes;c__negativicutes;o__selenomonadales;f__sporomusaceae;g__psychrosinus;s__"psychrosinus" fermentans; superkingdom__bacteria;	98.1308	0	733.454	8	42	122	1	0.00417923	0.0250444	0.046464	0.00044482	0.0247844
Zotu2013	"psychrosinus" fermentans ;k__bacteria;p__firmicutes;c__negativicutes;o__selenomonadales;f__sporomusaceae;g__psychrosinus;s__"psychrosinus" fermentans; superkingdom__bacteria;	97.6636	0	724.437	12	91	1	0	0.00626884	0.0542629	0.000380852	0	0.0203042
Zotu1048	"psychrosinus" fermentans ;k__bacteria;p__firmicutes;c__negativicutes;o__selenomonadales;f__sporomusaceae;g__psychrosinus;s__"psychrosinus" fermentans; superkingdom__bacteria;	96.9626	0	710.912	1	8	119	1	0.000522403	0.00477037	0.0453214	0.00044482	0.0164266
Zotu1152	"psychrosinus" fermentans ;k__bacteria;p__firmicutes;c__negativicutes;o__selenomonadales;f__sporomusaceae;g__psychrosinus;s__"psychrosinus" fermentans; superkingdom__bacteria;	97.1963	0	715.42	23	57	3	0	0.0120153	0.0339889	0.00114256	0	0.0157156
Zotu1227	"psychrosinus" fermentans ;k__bacteria;p__firmicutes;c__negativicutes;o__selenomonadales;f__sporomusaceae;g__psychrosinus;s__"psychrosinus" fermentans; superkingdom__bacteria;	96.9626	0	710.912	0	0	114	1	0	0	0.0434172	0.00044482	0.0140276
Zotu2453	"psychrosinus" fermentans ;k__bacteria;p__firmicutes;c__negativicutes;o__selenomonadales;f__sporomusaceae;g__psychrosinus;s__"psychrosinus" fermentans; superkingdom__bacteria;	98.1352	0	728.044	18	52	0	0	0.00940326	0.0310074	0	0	0.0134702
Zotu1469	"psychrosinus" fermentans ;k__bacteria;p__firmicutes;c__negativicutes;o__selenomonadales;f__sporomusaceae;g__psychrosinus;s__"psychrosinus" fermentans; superkingdom__bacteria;	97.8972	0	728.946	12	51	0	0	0.00626884	0.0304111	0	0	0.0122266
Zotu1426	"psychrosinus" fermentans ;k__bacteria;p__firmicutes;c__negativicutes;o__selenomonadales;f__sporomusaceae;g__psychrosinus;s__"psychrosinus" fermentans; superkingdom__bacteria;	98.5981	0	742.471	3	58	0	0	0.00156721	0.0345852	0	0	0.0120508
Zotu1580	"psychrosinus" fermentans ;k__bacteria;p__firmicutes;c__negativicutes;o__selenomonadales;f__sporomusaceae;g__psychrosinus;s__"psychrosinus" fermentans; superkingdom__bacteria;	98.3645	0	737.061	25	37	2	0	0.0130601	0.0220629	0.000761705	0	0.0119616
Zotu1609	"psychrosinus" fermentans ;k__bacteria;p__firmicutes;c__negativicutes;o__selenomonadales;f__sporomusaceae;g__psychrosinus;s__"psychrosinus" fermentans; superkingdom__bacteria;	97.8923	0	726.241	9	36	0	0	0.00470163	0.0214666	0	0	0.00872276
Zotu1853	"psychrosinus" fermentans ;k__bacteria;p__firmicutes;c__negativicutes;o__selenomonadales;f__sporomusaceae;g__psychrosinus;s__"psychrosinus" fermentans; superkingdom__bacteria;	96.9697	0	705.502	5	39	0	0	0.00261202	0.0232555	0	0	0.00862252
Zotu1973	"psychrosinus" fermentans ;k__bacteria;p__firmicutes;c__negativicutes;o__selenomonadales;f__sporomusaceae;g__psychrosinus;s__"psychrosinus" fermentans; superkingdom__bacteria;	98.5981	0	738.864	10	34	0	0	0.00522403	0.0202741	0	0	0.00849936
Zotu1939	"psychrosinus" fermentans ;k__bacteria;p__firmicutes;c__negativicutes;o__selenomonadales;f__sporomusaceae;g__psychrosinus;s__"psychrosinus" fermentans; superkingdom__bacteria;	92.2717	9.02199e-176	622.547	0	37	0	0	0	0.0220629	0	0	0.00735431
Zotu2599	"psychrosinus" fermentans ;k__bacteria;p__firmicutes;c__negativicutes;o__selenomonadales;f__sporomusaceae;g__psychrosinus;s__"psychrosinus" fermentans; superkingdom__bacteria;	97.8972	0	728.946	6	20	0	0	0.00313442	0.0119259	0	0	0.00502011
Zotu3195	"psychrosinus" fermentans ;k__bacteria;p__firmicutes;c__negativicutes;o__selenomonadales;f__sporomusaceae;g__psychrosinus;s__"psychrosinus" fermentans; superkingdom__bacteria;	98.1308	0	733.454	11	12	0	0	0.00574644	0.00715555	0	0	0.00430066
Zotu3075	"psychrosinus" fermentans ;k__bacteria;p__firmicutes;c__negativicutes;o__selenomonadales;f__sporomusaceae;g__psychrosinus;s__"psychrosinus" fermentans; superkingdom__bacteria;	97.8972	0	728.044	8	9	0	0	0.00417923	0.00536666	0	0	0.00318196
Zotu2885	[clostridium] glycolicum ;k__bacteria;p__firmicutes;c__clostridia;o__eubacteriales;f__peptostreptococcaceae;g__terrisporobacter;s__[clostridium] glycolicum;superkingdom__bacteria;	99.2519	0	710.01	18	0	0	0	0.00940326	0	0	0	0.00313442
Zotu2015	ab012335.1 microcystis wesenbergii tac52 ;k__bacteria;p__cyanobacteria;c__cyanobacteria;o__chroococcales;f__microcystaceae;g__microcystis;s__microcystis wesenbergii;superkingdom__bacteria;subclass oscillatoriophycideae;	100	0	729.847	22	15	0	0	0.0114929	0.00894444	0	0	0.00681244
Zotu2516	ab037677.1 alkaliphilus transvaalensis str. sagm1 ;k__bacteria;p__firmicutes;c__clostridia;o__eubacteriales;f__clostridiaceae;g__alkaliphilus;s__alkaliphilus transvaalensis;superkingdom__bacteria;	90.0744	1.86813e-152	544.1	19	13	0	1	0.00992566	0.00775185	0	0.00044482	0.00544768
Zotu350	ab039769.1 thermotoga thermarum str. dsm 5069 ;k__bacteria;p__thermotogae;c__thermotogae;o__thermotogales;f__thermotogaceae;g__thermotoga;s__thermotoga thermarum;superkingdom__bacteria	79.6651	3.16013e-99	368.272	24	1	348	1	0.0125377	0.000596296	0.132537	0.00044482	0.048112
Zotu962	ab039769.1 thermotoga thermarum str. dsm 5069 ;k__bacteria;p__thermotogae;c__thermotogae;o__thermotogales;f__thermotogaceae;g__thermotoga;s__thermotoga thermarum;superkingdom__bacteria	79.6651	3.16013e-99	367.37	77	39	0	0	0.0402251	0.0232555	0	0	0.0211602
Zotu270	ab039769.1 thermotoga thermarum str. dsm 5069 ;k__bacteria;p__thermotogae;c__thermotogae;o__thermotogales;f__thermotogaceae;g__thermotoga;s__thermotoga thermarum;superkingdom__bacteria	80.3828	1.4347e-103	381.797	1	1	1	660	0.000522403	0.000596296	0.000380852	0.293581	-0.293081
Zotu417	ab070984.1 nitrosospira multiformis str. atcc25196 ;k__bacteria;p__proteobacteria;c__betaproteobacteria;o__nitrosomonadales;f__nitrosomonadaceae;g__nitrosospira;s__nitrosospira multiformis;superkingdom__bacteria	94.3794	0	663.123	273	75	50	0	0.142616	0.0447222	0.0190426	0	0.0687936
Zotu594	ab070984.1 nitrosospira multiformis str. atcc25196 ;k__bacteria;p__proteobacteria;c__betaproteobacteria;o__nitrosomonadales;f__nitrosomonadaceae;g__nitrosospira;s__nitrosospira multiformis;superkingdom__bacteria	93.6768	0	648.696	156	54	37	1	0.0814949	0.0322	0.0140915	0.00044482	0.0421507
Zotu915	ab070984.1 nitrosospira multiformis str. atcc25196 ;k__bacteria;p__proteobacteria;c__betaproteobacteria;o__nitrosomonadales;f__nitrosomonadaceae;g__nitrosospira;s__nitrosospira multiformis;superkingdom__bacteria	92.2717	9.02199e-176	621.645	83	48	1	0	0.0433595	0.0286222	0.000380852	0	0.0241208
Zotu891	ab070984.1 nitrosospira multiformis str. atcc25196 ;k__bacteria;p__proteobacteria;c__betaproteobacteria;o__nitrosomonadales;f__nitrosomonadaceae;g__nitrosospira;s__nitrosospira multiformis;superkingdom__bacteria	88.8112	3.83964e-155	553.117	37	19	95	2	0.0193289	0.0113296	0.036181	0.00088964	0.0213902
Zotu1270	ab070984.1 nitrosospira multiformis str. atcc25196 ;k__bacteria;p__proteobacteria;c__betaproteobacteria;o__nitrosomonadales;f__nitrosomonadaceae;g__nitrosospira;s__nitrosospira multiformis;superkingdom__bacteria	95.5504	0	685.665	67	21	27	0	0.035001	0.0125222	0.010283	0	0.0192687
Zotu2443	ab070984.1 nitrosospira multiformis str. atcc25196 ;k__bacteria;p__proteobacteria;c__betaproteobacteria;o__nitrosomonadales;f__nitrosomonadaceae;g__nitrosospira;s__nitrosospira multiformis;superkingdom__bacteria	95.082	0	675.746	8	0	26	0	0.00417923	0	0.00990216	0	0.0046938
Zotu210	ab073201.1 paenibacillus apiarius str. dsm 5581 ;k__bacteria;p__firmicutes;c__bacilli;o__bacillales;f__paenibacillaceae;g__paenibacillus;s__paenibacillus apiarius;superkingdom__bacteria	93.662	0	647.794	112	321	195	3	0.0585092	0.191411	0.0742662	0.00133446	0.106728
Zotu260	ab080643.1 sulfuricurvum kujiense str. yk_2 ;k__bacteria;p__proteobacteria;c__epsilonproteobacteria;o__campylobacterales;f__thiovulaceae;g__sulfuricurvum;s__sulfuricurvum kujiense;superkingdom__bacteria;subphylum__delta/epsilon subdivisions;	97.5124	0	681.156	119	2	404	1	0.062166	0.00119259	0.153864	0.00044482	0.0719628
Zotu300	ab080643.1 sulfuricurvum kujiense str. yk_2 ;k__bacteria;p__proteobacteria;c__epsilonproteobacteria;o__campylobacterales;f__thiovulaceae;g__sulfuricurvum;s__sulfuricurvum kujiense;superkingdom__bacteria;subphylum__delta/epsilon subdivisions;	97.5124	0	681.156	244	60	123	1	0.127466	0.0357777	0.0468448	0.00044482	0.0695848
Zotu493	ab080643.1 sulfuricurvum kujiense str. yk_2 ;k__bacteria;p__proteobacteria;c__epsilonproteobacteria;o__campylobacterales;f__thiovulaceae;g__sulfuricurvum;s__sulfuricurvum kujiense;superkingdom__bacteria;subphylum__delta/epsilon subdivisions;	97.0149	0	672.139	109	46	74	0	0.056942	0.0274296	0.0281831	0	0.0375182
Zotu696	ab080643.1 sulfuricurvum kujiense str. yk_2 ;k__bacteria;p__proteobacteria;c__epsilonproteobacteria;o__campylobacterales;f__thiovulaceae;g__sulfuricurvum;s__sulfuricurvum kujiense;superkingdom__bacteria;subphylum__delta/epsilon subdivisions;	97.7612	0	684.763	31	0	135	0	0.0161945	0	0.0514151	0	0.0225365
Zotu2400	ab080643.1 sulfuricurvum kujiense str. yk_2 ;k__bacteria;p__proteobacteria;c__epsilonproteobacteria;o__campylobacterales;f__thiovulaceae;g__sulfuricurvum;s__sulfuricurvum kujiense;superkingdom__bacteria;subphylum__delta/epsilon subdivisions;	97.5124	0	681.156	34	0	0	0	0.0177617	0	0	0	0.00592057
Zotu2600	ab080643.1 sulfuricurvum kujiense str. yk_2 ;k__bacteria;p__proteobacteria;c__epsilonproteobacteria;o__campylobacterales;f__thiovulaceae;g__sulfuricurvum;s__sulfuricurvum kujiense;superkingdom__bacteria;subphylum__delta/epsilon subdivisions;	97.0149	0	672.139	5	0	36	0	0.00261202	0	0.0137107	0	0.0054409
Zotu2975	ab080643.1 sulfuricurvum kujiense str. yk_2 ;k__bacteria;p__proteobacteria;c__epsilonproteobacteria;o__campylobacterales;f__thiovulaceae;g__sulfuricurvum;s__sulfuricurvum kujiense;superkingdom__bacteria;subphylum__delta/epsilon subdivisions;	97.7612	0	684.763	19	0	0	0	0.00992566	0	0	0	0.00330855
Zotu1823	ab080644.1 sulfuricurvum kujiense str. yk_3 ;k__bacteria;p__proteobacteria;c__epsilonproteobacteria;o__campylobacterales;f__thiovulaceae;g__sulfuricurvum;s__sulfuricurvum kujiense;superkingdom__bacteria;subphylum__delta/epsilon subdivisions;	97.7612	0	684.763	29	0	0	0	0.0151497	0	0	0	0.0050499
Zotu1668	ab089840.1 alicyclobacillus pomorum str. 3a ;k__bacteria;p__firmicutes;c__bacilli;o__bacillales;f__alicyclobacillaceae;g__alicyclobacillus;s__alicyclobacillus pomorum;superkingdom__bacteria	100	0	771.325	9	48	0	0	0.00470163	0.0286222	0	0	0.0111079
Zotu1950	ab089840.1 alicyclobacillus pomorum str. 3a ;k__bacteria;p__firmicutes;c__bacilli;o__bacillales;f__alicyclobacillaceae;g__alicyclobacillus;s__alicyclobacillus pomorum;superkingdom__bacteria	99.7658	0	766.816	10	37	0	1	0.00522403	0.0220629	0	0.00044482	0.00865084
Zotu2104	ab089840.1 alicyclobacillus pomorum str. 3a ;k__bacteria;p__firmicutes;c__bacilli;o__bacillales;f__alicyclobacillaceae;g__alicyclobacillus;s__alicyclobacillus pomorum;superkingdom__bacteria	95.5504	0	685.665	2	36	0	0	0.00104481	0.0214666	0	0	0.00750382
Zotu2655	ab089840.1 alicyclobacillus pomorum str. 3a ;k__bacteria;p__firmicutes;c__bacilli;o__bacillales;f__alicyclobacillaceae;g__alicyclobacillus;s__alicyclobacillus pomorum;superkingdom__bacteria	96.2529	0	699.19	2	22	0	0	0.00104481	0.0131185	0	0	0.0047211
Zotu2579	ab089843.1 sulfobacillus disulfidooxidans str. dsm 12064 ;k__bacteria;p__firmicutes;c__bacilli;o__bacillales;f__alicyclobacillaceae;g__alicyclobacillus;s__alicyclobacillus disulfidooxidans;superkingdom__bacteria	93.911	0	654.106	0	24	0	0	0	0.0143111	0	0	0.00477037
Zotu1686	ab099708.1 bacillus vietnamensis str. 15_1 ;k__bacteria;p__firmicutes;c__bacilli;o__bacillales;f__bacillaceae;g__bacillus;s__bacillus vietnamensis;superkingdom__bacteria	98.1308	0	737.061	3	51	0	1	0.00156721	0.0304111	0	0.00044482	0.0102146
Zotu2263	ab099708.1 bacillus vietnamensis str. 15_1 ;k__bacteria;p__firmicutes;c__bacilli;o__bacillales;f__bacillaceae;g__bacillus;s__bacillus vietnamensis;superkingdom__bacteria	100	0	773.128	6	20	0	0	0.00313442	0.0119259	0	0	0.00502011
Zotu888	ab125279.1 clostridium straminisolvens str. csk1 ;k__bacteria;p__firmicutes;c__clostridia;o__eubacteriales;f__oscillospiraceae;g__ruminiclostridium;s__clostridium straminisolvens;superkingdom__bacteria;	94.0741	2.44088e-176	623.449	38	68	15	0	0.0198513	0.0405481	0.00571278	0	0.0220374
Zotu992	ab125279.1 clostridium straminisolvens str. csk1 ;k__bacteria;p__firmicutes;c__clostridia;o__eubacteriales;f__oscillospiraceae;g__ruminiclostridium;s__clostridium straminisolvens;superkingdom__bacteria;	84.8193	4.26278e-129	466.555	5	0	114	1	0.00261202	0	0.0434172	0.00044482	0.0148982
Zotu2388	ab125279.1 clostridium straminisolvens str. csk1 ;k__bacteria;p__firmicutes;c__clostridia;o__eubacteriales;f__oscillospiraceae;g__ruminiclostridium;s__clostridium straminisolvens;superkingdom__bacteria;	97.037	0	677.55	17	60	0	0	0.00888086	0.0357777	0	0	0.0148862
Zotu1833	ab125279.1 clostridium straminisolvens str. csk1 ;k__bacteria;p__firmicutes;c__clostridia;o__eubacteriales;f__oscillospiraceae;g__ruminiclostridium;s__clostridium straminisolvens;superkingdom__bacteria;	84.8193	4.26278e-129	466.555	35	23	0	0	0.0182841	0.0137148	0	0	0.0106663
Zotu3084	ab125279.1 clostridium straminisolvens str. csk1 ;k__bacteria;p__firmicutes;c__clostridia;o__eubacteriales;f__oscillospiraceae;g__ruminiclostridium;s__clostridium straminisolvens;superkingdom__bacteria;	94.8148	4.69937e-179	632.465	8	42	0	0	0.00417923	0.0250444	0	0	0.00974122
Zotu2383	ab125279.1 clostridium straminisolvens str. csk1 ;k__bacteria;p__firmicutes;c__clostridia;o__eubacteriales;f__oscillospiraceae;g__ruminiclostridium;s__clostridium straminisolvens;superkingdom__bacteria;	95.8025	0	647.794	7	36	1	0	0.00365682	0.0214666	0.000380852	0	0.00850144
Zotu1935	ab125279.1 clostridium straminisolvens str. csk1 ;k__bacteria;p__firmicutes;c__clostridia;o__eubacteriales;f__oscillospiraceae;g__ruminiclostridium;s__clostridium straminisolvens;superkingdom__bacteria;	94.0887	1.03789e-174	618.038	3	39	0	0	0.00156721	0.0232555	0	0	0.00827425
Zotu1764	ab125279.1 clostridium straminisolvens str. csk1 ;k__bacteria;p__firmicutes;c__clostridia;o__eubacteriales;f__oscillospiraceae;g__ruminiclostridium;s__clostridium straminisolvens;superkingdom__bacteria;	95.0617	0	641.482	2	35	0	0	0.00104481	0.0208704	0	0	0.00730505
Zotu1924	ab125279.1 clostridium straminisolvens str. csk1 ;k__bacteria;p__firmicutes;c__clostridia;o__eubacteriales;f__oscillospiraceae;g__ruminiclostridium;s__clostridium straminisolvens;superkingdom__bacteria;	94.5679	4.712e-179	632.465	11	26	0	0	0.00574644	0.0155037	0	0	0.00708338
Zotu2347	ab125279.1 clostridium straminisolvens str. csk1 ;k__bacteria;p__firmicutes;c__clostridia;o__eubacteriales;f__oscillospiraceae;g__ruminiclostridium;s__clostridium straminisolvens;superkingdom__bacteria;	84.8193	4.26278e-129	466.555	15	14	0	1	0.00783605	0.00834814	0	0.00044482	0.00494991
Zotu2896	ab125279.1 clostridium straminisolvens str. csk1 ;k__bacteria;p__firmicutes;c__clostridia;o__eubacteriales;f__oscillospiraceae;g__ruminiclostridium;s__clostridium straminisolvens;superkingdom__bacteria;	88.5856	2.59674e-144	517.05	5	19	1	0	0.00261202	0.0113296	0.000380852	0	0.00477416
Zotu2821	ab125279.1 clostridium straminisolvens str. csk1 ;k__bacteria;p__firmicutes;c__clostridia;o__eubacteriales;f__oscillospiraceae;g__ruminiclostridium;s__clostridium straminisolvens;superkingdom__bacteria;	95.5556	0	650.499	1	20	0	0	0.000522403	0.0119259	0	0	0.00414944
Zotu1087	ab161367.1 clostridium sardiniense str. dsm 2632 ;k__bacteria;p__firmicutes;c__clostridia;o__eubacteriales;f__clostridiaceae;g__clostridium;s__clostridium sardiniense;superkingdom__bacteria;	98.7562	0	703.698	44	39	2	1	0.0229857	0.0232555	0.000761705	0.00044482	0.0152228
Zotu2	ab184572.1 streptomyces wedmorensis str. nbrc 14062 ;k__bacteria;p__actinobacteria;c__actinomycetia;o__streptomycetales;f__streptomycetaceae;g__streptomyces;s__streptomyces wedmorensis;superkingdom__bacteria;	88.2353	2.63174e-144	517.05	1291	5368	12258	64	0.674423	3.20092	4.66849	0.0284685	2.81947
Zotu9	ab184572.1 streptomyces wedmorensis str. nbrc 14062 ;k__bacteria;p__actinobacteria;c__actinomycetia;o__streptomycetales;f__streptomycetaceae;g__streptomyces;s__streptomyces wedmorensis;superkingdom__bacteria;	87.9902	1.11904e-142	512.541	641	2373	3989	32	0.33486	1.41501	1.51922	0.0142342	1.07546
Zotu243	ab184621.1 kitasatospora mediocidica str. nbrc 14789 ;k__bacteria;p__actinobacteria;c__actinomycetia;o__streptomycetales;f__streptomycetaceae;g__kitasatospora;s__kitasatospora mediocidica;superkingdom__bacteria;	89.951	1.55412e-153	548.609	205	211	94	2	0.107093	0.125818	0.0358001	0.00088964	0.0886808
Zotu1020	ab184686.1 streptomyces torulosus str. nbrc 15460 ;k__bacteria;p__actinobacteria;c__actinomycetia;o__streptomycetales;f__streptomycetaceae;g__streptomyces;s__streptomyces torulosus;superkingdom__bacteria;	88.4804	2.16026e-145	520.657	21	77	1	0	0.0109705	0.0459148	0.000380852	0	0.0190887
Zotu1352	ab184686.1 streptomyces torulosus str. nbrc 15460 ;k__bacteria;p__actinobacteria;c__actinomycetia;o__streptomycetales;f__streptomycetaceae;g__streptomyces;s__streptomyces torulosus;superkingdom__bacteria;	88.9706	4.17029e-148	530.575	33	34	1	0	0.0172393	0.0202741	0.000380852	0	0.0126314
Zotu3197	ab184686.1 streptomyces torulosus str. nbrc 15460 ;k__bacteria;p__actinobacteria;c__actinomycetia;o__streptomycetales;f__streptomycetaceae;g__streptomyces;s__streptomyces torulosus;superkingdom__bacteria;	88.4804	2.16026e-145	521.558	14	0	0	0	0.00731365	0	0	0	0.00243788
Zotu423	ab185957.1 paracoccus marinus str. kkl_a5 ;k__bacteria;p__proteobacteria;c__alphaproteobacteria;o__rhodobacterales;f__rhodobacteraceae;g__paracoccus;s__paracoccus marinus;superkingdom__bacteria	100	0	726.241	1	0	323	2	0.000522403	0	0.123015	0.00088964	0.0402896
Zotu2902	ab196713.1 micromonospora marina str. jsm1_3 ;k__bacteria;p__actinobacteria;c__actinomycetia;o__micromonosporales;f__micromonosporaceae;g__micromonospora;s__micromonospora marina;superkingdom__bacteria;	95.8231	0	657.713	7	4	0	0	0.00365682	0.00238518	0	0	0.002014
Zotu1450	ab201626.1 azohydromonas lata str. iam 12665 ;k__bacteria;p__proteobacteria;c__betaproteobacteria;o__burkholderiales;f__comamonadaceae;g__azohydromonas;s__azohydromonas lata; superkingdom__bacteria;	97.6581	0	726.241	18	3	60	0	0.00940326	0.00178889	0.0228511	0	0.0113478
Zotu2573	ab210995.1 ureibacillus thermosphaericus str. sscs44 ;k__bacteria;p__firmicutes;c__bacilli;o__bacillales;f__planococcaceae;g__ureibacillus;s__ureibacillus thermosphaericus;superkingdom__bacteria	99.7658	0	766.816	12	24	0	0	0.00626884	0.0143111	0	0	0.00685998
Zotu1361	ab232785.1 pelotomaculum isophthalicicum str. ji ;k__bacteria;p__firmicutes;c__clostridia;o__eubacteriales;f__desulfotomaculaceae;g__pelotomaculum;s__pelotomaculum isophthalicicum; superkingdom__bacteria;	91.3366	1.3512e-160	572.053	23	75	1	0	0.0120153	0.0447222	0.000380852	0	0.0190394
Zotu1241	ab232785.1 pelotomaculum isophthalicicum str. ji ;k__bacteria;p__firmicutes;c__clostridia;o__eubacteriales;f__desulfotomaculaceae;g__pelotomaculum;s__pelotomaculum isophthalicicum; superkingdom__bacteria;	89.3564	9.72933e-150	535.985	35	39	1	0	0.0182841	0.0232555	0.000380852	0	0.0139735
Zotu35	ab236078.1 archaeal anaerobic lake sediment clone sl_eth ;k__archaea;p__euryarchaeota;c__methanobacteria;o__methanobacteriales;f__methanobacteriaceae;g__methanobacterium;s__methanobacterium bryantii;superkingdom__archaea	72.3684	4.20248e-40	170.803	3	2	6	2558	0.00156721	0.00119259	0.00228511	1.13785	-1.13617
Zotu2833	ab245377.1 bacillus pocheonensis str. gsoil 420 ;k__bacteria;p__firmicutes;c__bacilli;o__bacillales;f__bacillaceae;g__bacillus;s__bacillus pocheonensis;superkingdom__bacteria	100	0	771.325	24	70	0	0	0.0125377	0.0417407	0	0	0.0180928
Zotu2414	ab248087.1 paenibacillus terrigena str. a35 ;k__bacteria;p__firmicutes;c__bacilli;o__bacillales;f__paenibacillaceae;g__paenibacillus;s__paenibacillus terrigena;superkingdom__bacteria	93.1925	1.17055e-180	637.875	1	32	0	0	0.000522403	0.0190815	0	0	0.00653462
Zotu2200	ab248286.1 bacillus pumilus str. 105 (= kmm 3883) ;k__bacteria;p__firmicutes;c__bacilli;o__bacillales;f__bacillaceae;g__bacillus;s__bacillus pumilus;superkingdom__bacteria	100	0	773.128	9	25	0	0	0.00470163	0.0149074	0	0	0.00653634
Zotu463	ab252208.1 methylobacterium tardum str. rb677 ;k__bacteria;p__proteobacteria;c__alphaproteobacteria;o__hyphomicrobiales;f__methylobacteriaceae;g__methylobacterium;s__methylobacterium tardum;superkingdom__bacteria;	100	0	726.241	1	1	3	324	0.000522403	0.000596296	0.00114256	0.144122	-0.143368
Zotu2858	ab265205.1 paenibacillus thailandensis str. s3_4a ;k__bacteria;p__firmicutes;c__bacilli;o__bacillales;f__paenibacillaceae;g__paenibacillus;s__paenibacillus thailandensis;superkingdom__bacteria	99.7653	0	764.111	2	36	0	1	0.00104481	0.0214666	0	0.00044482	0.007059
Zotu2158	ab271747.1 bacillus circulans str. nbrc 13626 ;k__bacteria;p__firmicutes;c__bacilli;o__bacillales;f__bacillaceae;g__bacillus;s__bacillus circulans;superkingdom__bacteria	98.5948	0	744.274	1	25	0	0	0.000522403	0.0149074	0	0	0.00514327
Zotu436	ab278569.1 kitasatospora kazusanensis str. sk60 ;k__bacteria;p__actinobacteria;c__actinomycetia;o__streptomycetales;f__streptomycetaceae;g__kitasatospora;s__kitasatospora kazusanensis;superkingdom__bacteria;	91.6462	7.51337e-164	581.971	195	58	68	0	0.101869	0.0345852	0.025898	0	0.0541172
Zotu1982	ab278569.1 kitasatospora kazusanensis str. sk60 ;k__bacteria;p__actinobacteria;c__actinomycetia;o__streptomycetales;f__streptomycetaceae;g__kitasatospora;s__kitasatospora kazusanensis;superkingdom__bacteria;	88.9435	1.19163e-148	532.378	4	32	0	1	0.00208961	0.0190815	0	0.00044482	0.00661221
Zotu3125	ab278569.1 kitasatospora kazusanensis str. sk60 ;k__bacteria;p__actinobacteria;c__actinomycetia;o__streptomycetales;f__streptomycetaceae;g__kitasatospora;s__kitasatospora kazusanensis;superkingdom__bacteria;	91.4005	3.19477e-162	577.463	6	12	0	0	0.00313442	0.00715555	0	0	0.00342999
Zotu2932	ab278569.1 kitasatospora kazusanensis str. sk60 ;k__bacteria;p__actinobacteria;c__actinomycetia;o__streptomycetales;f__streptomycetaceae;g__kitasatospora;s__kitasatospora kazusanensis;superkingdom__bacteria;	89.6806	5.40999e-153	545.904	0	16	0	0	0	0.00954073	0	0	0.00318024
Zotu39	ab294141.1 clostridium thiosulfatireducens str. dsm 13105 ;k__bacteria;p__firmicutes;c__clostridia;o__eubacteriales;f__clostridiaceae;g__clostridium;s__clostridium thiosulfatireducens;superkingdom__bacteria;	96.2687	0	657.713	717	1336	166	10	0.374563	0.796651	0.0632215	0.0044482	0.40703
Zotu69	ab294141.1 clostridium thiosulfatireducens str. dsm 13105 ;k__bacteria;p__firmicutes;c__clostridia;o__eubacteriales;f__clostridiaceae;g__clostridium;s__clostridium thiosulfatireducens;superkingdom__bacteria;	96.0199	0	654.106	311	884	262	9	0.162467	0.527125	0.0997833	0.00400338	0.259122
Zotu118	ab294141.1 clostridium thiosulfatireducens str. dsm 13105 ;k__bacteria;p__firmicutes;c__clostridia;o__eubacteriales;f__clostridiaceae;g__clostridium;s__clostridium thiosulfatireducens;superkingdom__bacteria;	100	0	726.241	148	832	6	5	0.0773157	0.496118	0.00228511	0.0022241	0.189682
Zotu408	ab294141.1 clostridium thiosulfatireducens str. dsm 13105 ;k__bacteria;p__firmicutes;c__clostridia;o__eubacteriales;f__clostridiaceae;g__clostridium;s__clostridium thiosulfatireducens;superkingdom__bacteria;	99.005	0	708.207	83	200	2	1	0.0433595	0.119259	0.000761705	0.00044482	0.0540153
Zotu865	ab294141.1 clostridium thiosulfatireducens str. dsm 13105 ;k__bacteria;p__firmicutes;c__clostridia;o__eubacteriales;f__clostridiaceae;g__clostridium;s__clostridium thiosulfatireducens;superkingdom__bacteria;	97.5124	0	681.156	14	0	131	2	0.00731365	0	0.0498916	0.00088964	0.0181788
Zotu1218	ab294141.1 clostridium thiosulfatireducens str. dsm 13105 ;k__bacteria;p__firmicutes;c__clostridia;o__eubacteriales;f__clostridiaceae;g__clostridium;s__clostridium thiosulfatireducens;superkingdom__bacteria;	98.01	0	690.173	32	41	0	0	0.0167169	0.0244481	0	0	0.0137217
Zotu1688	ab294141.1 clostridium thiosulfatireducens str. dsm 13105 ;k__bacteria;p__firmicutes;c__clostridia;o__eubacteriales;f__clostridiaceae;g__clostridium;s__clostridium thiosulfatireducens;superkingdom__bacteria;	97.7612	0	685.665	7	40	0	0	0.00365682	0.0238518	0	0	0.00916955
Zotu1794	ab294141.1 clostridium thiosulfatireducens str. dsm 13105 ;k__bacteria;p__firmicutes;c__clostridia;o__eubacteriales;f__clostridiaceae;g__clostridium;s__clostridium thiosulfatireducens;superkingdom__bacteria;	98.5075	0	699.19	10	31	0	0	0.00522403	0.0184852	0	0	0.00790307
Zotu1858	ab294141.1 clostridium thiosulfatireducens str. dsm 13105 ;k__bacteria;p__firmicutes;c__clostridia;o__eubacteriales;f__clostridiaceae;g__clostridium;s__clostridium thiosulfatireducens;superkingdom__bacteria;	98.2587	0	694.682	23	18	0	0	0.0120153	0.0107333	0	0	0.00758287
Zotu2986	ab294141.1 clostridium thiosulfatireducens str. dsm 13105 ;k__bacteria;p__firmicutes;c__clostridia;o__eubacteriales;f__clostridiaceae;g__clostridium;s__clostridium thiosulfatireducens;superkingdom__bacteria;	97.2637	0	675.746	0	0	13	0	0	0	0.00495108	0	0.00165036
Zotu1671	ab297962.1 streptomyces tenebrarius str. nbrc 16177 ;k__bacteria;p__actinobacteria;c__actinomycetia;o__pseudonocardiales;f__pseudonocardiaceae;g__streptoalloteichus;s__streptomyces tenebrarius;superkingdom__bacteria;	88.1773	3.20611e-143	513.443	1	0	63	0	0.000522403	0	0.0239937	0	0.00817203
Zotu1876	ab307647.1 clay wall used japanese traditional buildings clone r22 ;k__bacteria;p__firmicutes;c__clostridia;o__eubacteriales;f__desulfitobacteriaceae;g__desulfosporosinus;s__desulfosporosinus meridiei; superkingdom__bacteria;	98.3645	0	741.569	9	39	0	0	0.00470163	0.0232555	0	0	0.00931906
Zotu495	ab334768.1 pseudomonas veronii str. mpu43 ;k__bacteria;p__proteobacteria;c__gammaproteobacteria;o__pseudomonadales;f__pseudomonadaceae;g__pseudomonas;s__pseudomonas veronii;superkingdom__bacteria;species group pseudomonas fluorescens group	100	0	771.325	3	0	3	316	0.00156721	0	0.00114256	0.140563	-0.13966
Zotu397	ab355702.1 thermomonas brevis str. s47 ;k__bacteria;p__proteobacteria;c__gammaproteobacteria;o__xanthomonadales;f__xanthomonadaceae;g__thermomonas;s__thermomonas brevis;superkingdom__bacteria	98.5948	0	746.078	1	2	4	428	0.000522403	0.00119259	0.00152341	0.190383	-0.189304
Zotu2313	ab377108.1 paenibacillus alvei str. aug6 ;k__bacteria;p__firmicutes;c__bacilli;o__bacillales;f__paenibacillaceae;g__paenibacillus;s__paenibacillus alvei;superkingdom__bacteria	94.3662	0	661.319	1	33	0	0	0.000522403	0.0196778	0	0	0.00673339
Zotu755	ab486543.1 microbial responsive denitrification_inducing conditions rice paddy soil clone tsbar003_p22 ;k__bacteria;p__firmicutes;c__clostridia;o__eubacteriales;f__clostridiaceae;g__caloramator;s__rice paddy;superkingdom__bacteria;	97.5124	0	681.156	29	126	0	0	0.0151497	0.0751333	0	0	0.0300943
Zotu894	ab486543.1 microbial responsive denitrification_inducing conditions rice paddy soil clone tsbar003_p22 ;k__bacteria;p__firmicutes;c__clostridia;o__eubacteriales;f__clostridiaceae;g__caloramator;s__rice paddy;superkingdom__bacteria;	96.5174	0	663.123	12	103	0	0	0.00626884	0.0614185	0	0	0.0225624
Zotu999	ab486543.1 microbial responsive denitrification_inducing conditions rice paddy soil clone tsbar003_p22 ;k__bacteria;p__firmicutes;c__clostridia;o__eubacteriales;f__clostridiaceae;g__caloramator;s__rice paddy;superkingdom__bacteria;	97.0149	0	672.139	17	85	1	0	0.00888086	0.0506851	0.000380852	0	0.0199823
Zotu2254	ab486543.1 microbial responsive denitrification_inducing conditions rice paddy soil clone tsbar003_p22 ;k__bacteria;p__firmicutes;c__clostridia;o__eubacteriales;f__clostridiaceae;g__caloramator;s__rice paddy;superkingdom__bacteria;	96.5174	0	663.123	3	39	0	0	0.00156721	0.0232555	0	0	0.00827425
Zotu2210	ab486543.1 microbial responsive denitrification_inducing conditions rice paddy soil clone tsbar003_p22 ;k__bacteria;p__firmicutes;c__clostridia;o__eubacteriales;f__clostridiaceae;g__caloramator;s__rice paddy;superkingdom__bacteria;	97.2637	0	675.746	1	31	0	0	0.000522403	0.0184852	0	0	0.00633586
Zotu2355	ab486543.1 microbial responsive denitrification_inducing conditions rice paddy soil clone tsbar003_p22 ;k__bacteria;p__firmicutes;c__clostridia;o__eubacteriales;f__clostridiaceae;g__caloramator;s__rice paddy;superkingdom__bacteria;	98.01	0	690.173	13	13	1	0	0.00679124	0.00775185	0.000380852	0	0.00497465
Zotu2920	ab486543.1 microbial responsive denitrification_inducing conditions rice paddy soil clone tsbar003_p22 ;k__bacteria;p__firmicutes;c__clostridia;o__eubacteriales;f__clostridiaceae;g__caloramator;s__rice paddy;superkingdom__bacteria;	96.0199	0	654.106	1	18	0	0	0.000522403	0.0107333	0	0	0.00375191
Zotu2820	ab486543.1 microbial responsive denitrification_inducing conditions rice paddy soil clone tsbar003_p22 ;k__bacteria;p__firmicutes;c__clostridia;o__eubacteriales;f__clostridiaceae;g__caloramator;s__rice paddy;superkingdom__bacteria;	97.2637	0	675.746	2	17	0	1	0.00104481	0.010137	0	0.00044482	0.00328246
Zotu1583	ab487486.1 microbial responsive denitrification_inducing conditions rice paddy soil clone tsnsr001_c23 ;k__bacteria;p__proteobacteria;c__betaproteobacteria;o__burkholderiales;f__oxalobacteraceae;g__massilia;s__massilia timonae;superkingdom__bacteria	89.3271	1.34016e-154	551.314	42	18	0	0	0.0219409	0.0107333	0	0	0.0108914
Zotu246	ab504948.1 structure microorganisms reddish_brown iron_rich snow clone oze05b44 ;k__bacteria;p__proteobacteria;c__betaproteobacteria;o__rhodocyclales;f__rhodocyclaceae;g__rhodocyclus;s__rhodocyclus tenuis;superkingdom__bacteria	91.1007	2.9493e-169	600.005	349	63	141	2	0.182319	0.0375666	0.0537002	0.00088964	0.0903055
Zotu2864	ab537170.1 mycobacterium madagascariense str. jcm 13574 ;k__bacteria;p__actinobacteria;c__actinomycetia;o__corynebacteriales;f__mycobacteriaceae;g__mycobacterium;s__mycobacterium madagascariense;superkingdom__bacteria;	97.7887	0	693.78	21	6	0	0	0.0109705	0.00357777	0	0	0.00484941
Zotu2043	ab537487.1 burkholderia ferrariae str. nbrc 106233 ;k__bacteria;p__proteobacteria;c__betaproteobacteria;o__burkholderiales;f__burkholderiaceae;g__burkholderia;s__burkholderia ferrariae;superkingdom__bacteria	91.1007	2.9493e-169	600.005	46	12	0	0	0.0240306	0.00715555	0	0	0.0103954
Zotu2973	ab537487.1 burkholderia ferrariae str. nbrc 106233 ;k__bacteria;p__proteobacteria;c__betaproteobacteria;o__burkholderiales;f__burkholderiaceae;g__burkholderia;s__burkholderia ferrariae;superkingdom__bacteria	91.1007	2.9493e-169	600.005	15	0	0	0	0.00783605	0	0	0	0.00261202
Zotu33	ab542933.1 clostridium ghonii str. jcm 1400 ;k__bacteria;p__firmicutes;c__clostridia;o__eubacteriales;f__peptostreptococcaceae;g__peptoclostridium;s__clostridium ghonii;superkingdom__bacteria;	100	0	724.437	893	1620	312	18	0.466506	0.965999	0.118826	0.00800676	0.509104
Zotu2860	ab546248.1 desulfobulbus rhabdoformis str. mic5c02 ;k__bacteria;p__proteobacteria;c__deltaproteobacteria;o__desulfobacterales;f__desulfobulbaceae;g__desulfobulbus;s__desulfobulbus rhabdoformis;superkingdom__bacteria;subphylum__delta/epsilon subdivisions	83.1731	1.10481e-117	428.685	28	10	0	1	0.0146273	0.00596296	0	0.00044482	0.0064186
Zotu771	ab546250.1 desulfovibrio capillatus str. mic4c01 ;k__bacteria;p__proteobacteria;c__deltaproteobacteria;o__desulfovibrionales;f__desulfovibrionaceae;g__desulfovibrio;s__desulfovibrio capillatus;superkingdom__bacteria;subphylum__delta/epsilon subdivisions	82.6923	6.98971e-114	416.061	1	1	149	0	0.000522403	0.000596296	0.056747	0	0.0192886
Zotu1192	ab546250.1 desulfovibrio capillatus str. mic4c01 ;k__bacteria;p__proteobacteria;c__deltaproteobacteria;o__desulfovibrionales;f__desulfovibrionaceae;g__desulfovibrio;s__desulfovibrio capillatus;superkingdom__bacteria;subphylum__delta/epsilon subdivisions	82.9327	5.7375e-115	419.668	40	2	60	0	0.0208961	0.00119259	0.0228511	0	0.01498
Zotu3092	ab546250.1 desulfovibrio capillatus str. mic4c01 ;k__bacteria;p__proteobacteria;c__deltaproteobacteria;o__desulfovibrionales;f__desulfovibrionaceae;g__desulfovibrio;s__desulfovibrio capillatus;superkingdom__bacteria;subphylum__delta/epsilon subdivisions	83.1731	1.34933e-116	425.078	27	0	1	0	0.0141049	0	0.000380852	0	0.00482858
Zotu149	ab546256.1 methanococcus aeolicus str. mic6c09 ;k__archaea;p__euryarchaeota;c__methanococci;o__methanococcales;f__methanococcaceae;g__methanococcus;s__methanococcus aeolicus;superkingdom__archaea	74.2138	2.49575e-49	201.46	9	1	815	1	0.00470163	0.000596296	0.310395	0.00044482	0.104786
Zotu563	abvl01000001.1 chthoniobacter flavus str. ellin428 ;k__bacteria;p__verrucomicrobia;c__spartobacteria;o__chthoniobacterales;f__chthoniobacteraceae;g__chthoniobacter;s__chthoniobacter flavus; superkingdom__bacteria;	80.7425	5.33308e-109	399.831	1	1	215	1	0.000522403	0.000596296	0.0818832	0.00044482	0.0272225
Zotu1294	abvl01000001.1 chthoniobacter flavus str. ellin428 ;k__bacteria;p__verrucomicrobia;c__spartobacteria;o__chthoniobacterales;f__chthoniobacteraceae;g__chthoniobacter;s__chthoniobacter flavus; superkingdom__bacteria;	81.4988	3.61164e-111	407.946	3	12	91	0	0.00156721	0.00715555	0.0346576	0	0.0144601
Zotu1286	abvl01000001.1 chthoniobacter flavus str. ellin428 ;k__bacteria;p__verrucomicrobia;c__spartobacteria;o__chthoniobacterales;f__chthoniobacteraceae;g__chthoniobacter;s__chthoniobacter flavus; superkingdom__bacteria;	81.9249	1.6314e-115	422.373	50	1	43	1	0.0261202	0.000596296	0.0163766	0.00044482	0.0139195
Zotu2297	abvl01000001.1 chthoniobacter flavus str. ellin428 ;k__bacteria;p__verrucomicrobia;c__spartobacteria;o__chthoniobacterales;f__chthoniobacteraceae;g__chthoniobacter;s__chthoniobacter flavus; superkingdom__bacteria;	81.733	8.49376e-113	412.454	21	0	37	0	0.0109705	0	0.0140915	0	0.008354
Zotu1824	abvl01000001.1 chthoniobacter flavus str. ellin428 ;k__bacteria;p__verrucomicrobia;c__spartobacteria;o__chthoniobacterales;f__chthoniobacteraceae;g__chthoniobacter;s__chthoniobacter flavus; superkingdom__bacteria;	81.9797	5.02026e-103	379.994	2	0	57	0	0.00104481	0	0.0217086	0	0.00758446
Zotu1553	abvl01000001.1 chthoniobacter flavus str. ellin428 ;k__bacteria;p__verrucomicrobia;c__spartobacteria;o__chthoniobacterales;f__chthoniobacteraceae;g__chthoniobacter;s__chthoniobacter flavus; superkingdom__bacteria;	81.0304	4.39988e-110	403.438	0	0	55	0	0	0	0.0209469	0	0.00698229
Zotu2666	abvl01000001.1 chthoniobacter flavus str. ellin428 ;k__bacteria;p__verrucomicrobia;c__spartobacteria;o__chthoniobacterales;f__chthoniobacteraceae;g__chthoniobacter;s__chthoniobacter flavus; superkingdom__bacteria;	93.1925	1.4224e-179	635.17	26	2	0	0	0.0135825	0.00119259	0	0	0.00492503
Zotu1276	acetivibrio cellulolyticus ;k__bacteria;p__firmicutes;c__clostridia;o__eubacteriales;f__oscillospiraceae;g__acetivibrio;s__acetivibrio cellulolyticus;superkingdom__bacteria;	93.5484	1.86648e-171	607.218	15	62	1	0	0.00783605	0.0369703	0.000380852	0	0.0150624
Zotu2473	acetivibrio cellulolyticus ;k__bacteria;p__firmicutes;c__clostridia;o__eubacteriales;f__oscillospiraceae;g__acetivibrio;s__acetivibrio cellulolyticus;superkingdom__bacteria;	96.7742	0	664.926	3	50	1	0	0.00156721	0.0298148	0.000380852	0	0.0105876
Zotu1867	acetivibrio cellulolyticus ;k__bacteria;p__firmicutes;c__clostridia;o__eubacteriales;f__oscillospiraceae;g__acetivibrio;s__acetivibrio cellulolyticus;superkingdom__bacteria;	95.7816	0	647.794	3	34	0	1	0.00156721	0.0202741	0	0.00044482	0.0068356
Zotu2336	acetivibrio cellulolyticus ;k__bacteria;p__firmicutes;c__clostridia;o__eubacteriales;f__oscillospiraceae;g__acetivibrio;s__acetivibrio cellulolyticus;superkingdom__bacteria;	94.7761	1.63142e-178	630.662	4	26	1	0	0.00208961	0.0155037	0.000380852	0	0.00599139
Zotu2544	acetivibrio cellulolyticus ;k__bacteria;p__firmicutes;c__clostridia;o__eubacteriales;f__oscillospiraceae;g__acetivibrio;s__acetivibrio cellulolyticus;superkingdom__bacteria;	96.2963	0	662.221	6	24	0	0	0.00313442	0.0143111	0	0	0.00581517
Zotu2382	acetivibrio cellulolyticus ;k__bacteria;p__firmicutes;c__clostridia;o__eubacteriales;f__oscillospiraceae;g__acetivibrio;s__acetivibrio cellulolyticus;superkingdom__bacteria;	99.5025	0	717.224	1	28	0	0	0.000522403	0.0166963	0	0	0.00573956
Zotu2207	acetivibrio cellulolyticus ;k__bacteria;p__firmicutes;c__clostridia;o__eubacteriales;f__oscillospiraceae;g__acetivibrio;s__acetivibrio cellulolyticus;superkingdom__bacteria;	94.7761	1.63142e-178	630.662	11	19	0	0	0.00574644	0.0113296	0	0	0.00569202
Zotu2099	acetivibrio cellulolyticus ;k__bacteria;p__firmicutes;c__clostridia;o__eubacteriales;f__oscillospiraceae;g__acetivibrio;s__acetivibrio cellulolyticus;superkingdom__bacteria;	93.7965	1.5321e-172	611.727	6	23	0	0	0.00313442	0.0137148	0	0	0.00561641
Zotu2705	acetivibrio cellulolyticus ;k__bacteria;p__firmicutes;c__clostridia;o__eubacteriales;f__oscillospiraceae;g__acetivibrio;s__acetivibrio cellulolyticus;superkingdom__bacteria;	95.3086	0	644.187	0	24	0	0	0	0.0143111	0	0	0.00477037
Zotu3127	acetivibrio cellulolyticus ;k__bacteria;p__firmicutes;c__clostridia;o__eubacteriales;f__oscillospiraceae;g__acetivibrio;s__acetivibrio cellulolyticus;superkingdom__bacteria;	93.0348	2.76264e-169	600.005	2	17	0	0	0.00104481	0.010137	0	0	0.00372728
Zotu1021	acetivibrio ethanolgignens ;k__bacteria;p__firmicutes;c__clostridia;o__eubacteriales;f__oscillospiraceae;g__acetivibrio;s__acetivibrio ethanolgignens;superkingdom__bacteria;	97.7612	0	684.763	13	0	112	0	0.00679124	0	0.0426555	0	0.0164822
Zotu1952	acetivibrio ethanolgignens ;k__bacteria;p__firmicutes;c__clostridia;o__eubacteriales;f__oscillospiraceae;g__acetivibrio;s__acetivibrio ethanolgignens;superkingdom__bacteria;	97.2637	0	676.648	0	43	1	0	0	0.0256407	0.000380852	0	0.00867386
Zotu1874	acetivibrio ethanolgignens ;k__bacteria;p__firmicutes;c__clostridia;o__eubacteriales;f__oscillospiraceae;g__acetivibrio;s__acetivibrio ethanolgignens;superkingdom__bacteria;	97.7612	0	685.665	4	37	0	0	0.00208961	0.0220629	0	0	0.00805085
Zotu2053	acetivibrio ethanolgignens ;k__bacteria;p__firmicutes;c__clostridia;o__eubacteriales;f__oscillospiraceae;g__acetivibrio;s__acetivibrio ethanolgignens;superkingdom__bacteria;	98.01	0	690.173	5	31	0	0	0.00261202	0.0184852	0	0	0.0070324
Zotu2937	acetivibrio ethanolgignens ;k__bacteria;p__firmicutes;c__clostridia;o__eubacteriales;f__oscillospiraceae;g__acetivibrio;s__acetivibrio ethanolgignens;superkingdom__bacteria;	98.2587	0	693.78	3	29	0	0	0.00156721	0.0172926	0	0	0.0062866
Zotu1989	acetivibrio ethanolgignens ;k__bacteria;p__firmicutes;c__clostridia;o__eubacteriales;f__oscillospiraceae;g__acetivibrio;s__acetivibrio ethanolgignens;superkingdom__bacteria;	97.0149	0	672.139	11	20	0	0	0.00574644	0.0119259	0	0	0.00589078
Zotu1263	acidobacteriaceae bacterium k22 ;k__bacteria;p__acidobacteria;c__blastocatellia;o__blastocatellales;f__pyrinomonadaceae;g__pyrinomonas;s__acidobacteriaceae bacterium; superkingdom__bacteria;	78.8235	1.02782e-92	346.631	62	18	5	1	0.032389	0.0107333	0.00190426	0.00044482	0.014564
Zotu1094	acidobacterium capsulatum ;k__bacteria;p__acidobacteria;c__acidobacteriia;o__acidobacteriales;f__acidobacteriaceae;g__acidobacterium;s__acidobacterium capsulatum;superkingdom__bacteria;superphylum__fibrobacteres/acidobacteria group	83.0424	2.26758e-113	414.258	82	23	0	0	0.0428371	0.0137148	0	0	0.0188506
Zotu498	acidocella aluminiidurans ;k__bacteria;p__proteobacteria;c__alphaproteobacteria;o__rhodospirillales;f__acetobacteraceae;g__acidocella;s__acidocella aluminiidurans;superkingdom__bacteria	98.2587	0	693.78	1	0	2	285	0.000522403	0	0.000761705	0.126774	-0.126346
Zotu388	acidocella aluminiidurans ;k__bacteria;p__proteobacteria;c__alphaproteobacteria;o__rhodospirillales;f__acetobacteraceae;g__acidocella;s__acidocella aluminiidurans;superkingdom__bacteria	98.5075	0	699.19	1	0	0	441	0.000522403	0	0	0.196166	-0.195992
Zotu154	acidothermus cellulolyticus 11b ;k__bacteria;p__actinobacteria;c__actinomycetia;o__acidothermales;f__acidothermaceae;g__acidothermus;s__acidothermus cellulolyticus;superkingdom__bacteria;	98.2843	0	705.502	125	205	443	5	0.0653004	0.122241	0.168718	0.0022241	0.116529
Zotu203	acidothermus cellulolyticus 11b ;k__bacteria;p__actinobacteria;c__actinomycetia;o__acidothermales;f__acidothermaceae;g__acidothermus;s__acidothermus cellulolyticus;superkingdom__bacteria;	98.5294	0	710.01	63	124	431	7	0.0329114	0.0739407	0.164147	0.00311374	0.0872194
Zotu2547	acidothermus cellulolyticus 11b ;k__bacteria;p__actinobacteria;c__actinomycetia;o__acidothermales;f__acidothermaceae;g__acidothermus;s__acidothermus cellulolyticus;superkingdom__bacteria;	98.5294	0	710.01	0	20	1	0	0	0.0119259	0.000380852	0	0.00410226
Zotu1933	aciduliprofundum boonei t469 ;k__archaea;p__euryarchaeota;c__euryarchaeota;o__euryarchaeota;f__euryarchaeota;g__aciduliprofundum;s__aciduliprofundum boonei;superkingdom__archaea	75.8442	7.10389e-69	266.382	24	0	0	0	0.0125377	0	0	0	0.00417923
Zotu432	actinocatenispora rupis ;k__bacteria;p__actinobacteria;c__actinomycetia;o__micromonosporales;f__micromonosporaceae;g__actinocatenispora;s__actinocatenispora rupis;superkingdom__bacteria;	88.9976	4.1592e-148	530.575	32	216	2	0	0.0167169	0.1288	0.000761705	0	0.0487595
Zotu2696	actinocatenispora rupis ;k__bacteria;p__actinobacteria;c__actinomycetia;o__micromonosporales;f__micromonosporaceae;g__actinocatenispora;s__actinocatenispora rupis;superkingdom__bacteria;	89.951	1.55412e-153	548.609	20	6	0	0	0.0104481	0.00357777	0	0	0.00467528
Zotu46	actinocatenispora rupis ;k__bacteria;p__actinobacteria;c__actinomycetia;o__micromonosporales;f__micromonosporaceae;g__actinocatenispora;s__actinocatenispora rupis;superkingdom__bacteria;	88.9706	5.06694e-147	526.067	292	409	576	1118	0.152542	0.243885	0.219371	0.497309	-0.292043
Zotu1626	actinoplanes missouriensis ;k__bacteria;p__actinobacteria;c__actinomycetia;o__micromonosporales;f__micromonosporaceae;g__actinoplanes;s__actinoplanes missouriensis;superkingdom__bacteria;	99.2629	0	722.634	16	40	0	0	0.00835845	0.0238518	0	0	0.0107368
Zotu3126	actinoplanes missouriensis ;k__bacteria;p__actinobacteria;c__actinomycetia;o__micromonosporales;f__micromonosporaceae;g__actinoplanes;s__actinoplanes missouriensis;superkingdom__bacteria;	99.0172	0	718.125	0	13	0	0	0	0.00775185	0	0	0.00258395
Zotu1750	ae017285.1 desulfovibrio subsp. vulgaris str. hildenborough ;k__bacteria;p__proteobacteria;c__deltaproteobacteria;o__desulfovibrionales;f__desulfovibrionaceae;g__desulfovibrio;s__desulfovibrio vulgaris;superkingdom__bacteria;subphylum__delta/epsilon subdivisions	84.6512	1.26265e-129	469.261	3	9	46	0	0.00156721	0.00536666	0.0175192	0	0.00815103
Zotu800	aetherobacter rufus ;k__bacteria;p__proteobacteria;c__deltaproteobacteria;o__myxococcales;f__polyangiaceae;g__aetherobacter;s__aetherobacter rufus;superkingdom__bacteria;subphylum__delta/epsilon subdivisions;suborder__sorangiineae	96.7136	0	706.404	8	1	146	0	0.00417923	0.000596296	0.0556044	0	0.0201267
Zotu2206	af010251.1 klebsiella granulomatis str. kh 22 d peripheral blood monocytes ;k__bacteria;p__proteobacteria;c__gammaproteobacteria;o__enterobacterales;f__enterobacteriaceae;g__klebsiella;s__klebsiella granulomatis; superkingdom__bacteria;	99.7658	0	765.915	1	6	28	0	0.000522403	0.00357777	0.0106639	0	0.00492135
Zotu1605	af014937.1 mycobacterium interjectum patient 3 ;k__bacteria;p__actinobacteria;c__actinomycetia;o__corynebacteriales;f__mycobacteriaceae;g__mycobacterium;s__mycobacterium interjectum;superkingdom__bacteria;	98.2801	0	702.797	60	0	0	1	0.0313442	0	0	0.00044482	0.0100032
Zotu761	af028351.1 clostridium indolis cm971 ;k__bacteria;p__firmicutes;c__clostridia;o__eubacteriales;f__lachnospiraceae;g__anaerostipes;s__anaerostipes caccae;superkingdom__bacteria;	89.3564	1.1821e-148	532.378	27	134	1	1	0.0141049	0.0799036	0.000380852	0.00044482	0.0310183
Zotu302	af028690.2 methanobacterium oryzae str. fpi ;k__archaea;p__euryarchaeota;c__methanobacteria;o__methanobacteriales;f__methanobacteriaceae;g__methanobacterium;s__methanobacterium oryzae;superkingdom__archaea	72.549	3.43983e-41	174.41	1	0	411	0	0.000522403	0	0.15653	0	0.0523509
Zotu2108	af055331.1 mycobacterium ratisbonense ;k__bacteria;p__actinobacteria;c__actinomycetia;o__corynebacteriales;f__mycobacteriaceae;g__mycobacterium;s__mycobacterium ratisbonense;superkingdom__bacteria;	99.0172	0	717.224	25	7	0	2	0.0130601	0.00417407	0	0.00088964	0.00485508
Zotu2092	af099062.1 desulfotalea psychrophila str. lsv54 ;k__bacteria;p__proteobacteria;c__deltaproteobacteria;o__desulfobacterales;f__desulfocapsaceae;g__desulfotalea;s__desulfotalea psychrophila; subphylum__delta/epsilon subdivisions;superkingdom__bacteria;	84.3091	3.60845e-130	470.162	9	6	51	1	0.00470163	0.00357777	0.0194235	0.00044482	0.00878947
Zotu2683	af099062.1 desulfotalea psychrophila str. lsv54 ;k__bacteria;p__proteobacteria;c__deltaproteobacteria;o__desulfobacterales;f__desulfocapsaceae;g__desulfotalea;s__desulfotalea psychrophila; subphylum__delta/epsilon subdivisions;superkingdom__bacteria;	82.6923	6.98971e-114	416.963	24	1	0	0	0.0125377	0.000596296	0	0	0.00437799
Zotu2131	af116559.1 thermomonospora chromogena str. atcc43196 ;k__bacteria;p__actinobacteria;c__actinomycetia;o__streptosporangiales;f__streptosporangiaceae;g__thermobispora;s__thermobispora bispora;superkingdom__bacteria;	76.0599	1.18628e-72	279.005	2	28	0	1	0.00104481	0.0166963	0	0.00044482	0.00546888
Zotu2498	af123077.1 azoarcus toluclasticus str. mf63 ;k__bacteria;p__proteobacteria;c__betaproteobacteria;o__rhodocyclales;f__zoogloeaceae;g__azoarcus;s__azoarcus toluclasticus; superkingdom__bacteria;	93.911	0	654.106	15	19	0	0	0.00783605	0.0113296	0	0	0.00638856
Zotu3097	af123077.1 azoarcus toluclasticus str. mf63 ;k__bacteria;p__proteobacteria;c__betaproteobacteria;o__rhodocyclales;f__zoogloeaceae;g__azoarcus;s__azoarcus toluclasticus; superkingdom__bacteria;	94.6136	0	666.729	5	0	26	0	0.00261202	0	0.00990216	0	0.00417139
Zotu1817	af125090.1 tetrasphaera australiensis str. 110 ;k__bacteria;p__actinobacteria;c__actinomycetia;o__micrococcales;f__intrasporangiaceae;g__tetrasphaera;s__tetrasphaera australiensis;superkingdom__bacteria;	86.2408	1.86978e-133	480.982	14	26	0	0	0.00731365	0.0155037	0	0	0.00760578
Zotu2425	af137502.2 alicyclobacillus tolerans str. k1 ;k__bacteria;p__firmicutes;c__bacilli;o__bacillales;f__alicyclobacillaceae;g__alicyclobacillus;s__alicyclobacillus tolerans;superkingdom__bacteria	87.6168	4.38102e-148	529.673	4	24	0	0	0.00208961	0.0143111	0	0	0.0054669
Zotu37	af143692.1 clostridium gasigenes str. r26 ;k__bacteria;p__firmicutes;c__clostridia;o__eubacteriales;f__clostridiaceae;g__clostridium;s__clostridium gasigenes;superkingdom__bacteria;	99.2537	0	711.814	799	1080	323	6	0.4174	0.643999	0.123015	0.00266892	0.392136
Zotu165	af143692.1 clostridium gasigenes str. r26 ;k__bacteria;p__firmicutes;c__clostridia;o__eubacteriales;f__clostridiaceae;g__clostridium;s__clostridium gasigenes;superkingdom__bacteria;	100	0	726.241	194	392	141	2	0.101346	0.233748	0.0537002	0.00088964	0.128708
Zotu166	af143692.1 clostridium gasigenes str. r26 ;k__bacteria;p__firmicutes;c__clostridia;o__eubacteriales;f__clostridiaceae;g__clostridium;s__clostridium gasigenes;superkingdom__bacteria;	99.7512	0	720.83	230	407	5	5	0.120153	0.242692	0.00190426	0.0022241	0.119359
Zotu205	af143692.1 clostridium gasigenes str. r26 ;k__bacteria;p__firmicutes;c__clostridia;o__eubacteriales;f__clostridiaceae;g__clostridium;s__clostridium gasigenes;superkingdom__bacteria;	99.5025	0	717.224	158	215	332	4	0.0825397	0.128204	0.126443	0.00177928	0.110616
Zotu2618	af143692.1 clostridium gasigenes str. r26 ;k__bacteria;p__firmicutes;c__clostridia;o__eubacteriales;f__clostridiaceae;g__clostridium;s__clostridium gasigenes;superkingdom__bacteria;	99.5025	0	717.224	30	0	0	0	0.0156721	0	0	0	0.00522403
Zotu625	af156796.1 clostridium peptidivorans str. tmc4 ;k__bacteria;p__firmicutes;c__clostridia;o__eubacteriales;f__clostridiaceae;g__clostridium;s__clostridium peptidivorans;superkingdom__bacteria;	100	0	726.241	37	175	1	2	0.0193289	0.104352	0.000380852	0.00088964	0.0404642
Zotu1217	af156796.1 clostridium peptidivorans str. tmc4 ;k__bacteria;p__firmicutes;c__clostridia;o__eubacteriales;f__clostridiaceae;g__clostridium;s__clostridium peptidivorans;superkingdom__bacteria;	88.8889	5.03992e-147	526.968	18	58	1	0	0.00940326	0.0345852	0.000380852	0	0.0147898
Zotu1193	af164345.1 paenibacillus chinjuensis str. wn9 ;k__bacteria;p__firmicutes;c__bacilli;o__bacillales;f__paenibacillaceae;g__paenibacillus;s__paenibacillus chinjuensis;superkingdom__bacteria	92.9577	1.42602e-179	634.269	4	85	1	0	0.00208961	0.0506851	0.000380852	0	0.0177185
Zotu64	af239696.1 isolation gemmata_like isosphaera_like planctomycete soil and freshwater australia:university queensland st. lucia campus fountain next central library isolate jw11_2f5gemmata_like str. jw11_2f5 ;k__bacteria;p__planctomycetes;c__planctomycetia;o__gemmatales;f__gemmataceae;g__gemmata;s__gemmata obscuriglobus; superkingdom__bacteria;	88.6199	5.14801e-147	526.067	980	471	37	4	0.511955	0.280855	0.0140915	0.00177928	0.267188
Zotu1362	af239696.1 isolation gemmata_like isosphaera_like planctomycete soil and freshwater australia:university queensland st. lucia campus fountain next central library isolate jw11_2f5gemmata_like str. jw11_2f5 ;k__bacteria;p__planctomycetes;c__planctomycetia;o__gemmatales;f__gemmataceae;g__gemmata;s__gemmata obscuriglobus; superkingdom__bacteria;	92.2141	2.14688e-164	584.676	55	9	0	0	0.0287322	0.00536666	0	0	0.0113663
Zotu1433	af239696.1 isolation gemmata_like isosphaera_like planctomycete soil and freshwater australia:university queensland st. lucia campus fountain next central library isolate jw11_2f5gemmata_like str. jw11_2f5 ;k__bacteria;p__planctomycetes;c__planctomycetia;o__gemmatales;f__gemmataceae;g__gemmata;s__gemmata obscuriglobus; superkingdom__bacteria;	87.4092	1.68289e-140	504.426	25	26	0	0	0.0130601	0.0155037	0	0	0.00952126
Zotu812	af272420.1 nitrosomonas aestuarii ;k__bacteria;p__proteobacteria;c__betaproteobacteria;o__nitrosomonadales;f__nitrosomonadaceae;g__nitrosomonas;s__nitrosomonas aestuarii;superkingdom__bacteria	97.4239	0	720.83	56	98	0	3	0.0292546	0.058437	0	0.00133446	0.0278961
Zotu707	af272420.1 nitrosomonas aestuarii ;k__bacteria;p__proteobacteria;c__betaproteobacteria;o__nitrosomonadales;f__nitrosomonadaceae;g__nitrosomonas;s__nitrosomonas aestuarii;superkingdom__bacteria	96.9555	0	711.814	34	15	145	0	0.0177617	0.00894444	0.0552236	0	0.0273099
Zotu929	af272420.1 nitrosomonas aestuarii ;k__bacteria;p__proteobacteria;c__betaproteobacteria;o__nitrosomonadales;f__nitrosomonadaceae;g__nitrosomonas;s__nitrosomonas aestuarii;superkingdom__bacteria	97.6581	0	726.241	64	23	57	0	0.0334338	0.0137148	0.0217086	0	0.0229524
Zotu2828	af272420.1 nitrosomonas aestuarii ;k__bacteria;p__proteobacteria;c__betaproteobacteria;o__nitrosomonadales;f__nitrosomonadaceae;g__nitrosomonas;s__nitrosomonas aestuarii;superkingdom__bacteria	97.6581	0	726.241	15	6	0	0	0.00783605	0.00357777	0	0	0.00380461
Zotu3010	af272420.1 nitrosomonas aestuarii ;k__bacteria;p__proteobacteria;c__betaproteobacteria;o__nitrosomonadales;f__nitrosomonadaceae;g__nitrosomonas;s__nitrosomonas aestuarii;superkingdom__bacteria	97.4239	0	721.732	20	0	0	0	0.0104481	0	0	0	0.00348269
Zotu2621	af272420.1 nitrosomonas aestuarii ;k__bacteria;p__proteobacteria;c__betaproteobacteria;o__nitrosomonadales;f__nitrosomonadaceae;g__nitrosomonas;s__nitrosomonas aestuarii;superkingdom__bacteria	97.8923	0	730.749	10	6	1	0	0.00522403	0.00357777	0.000380852	0	0.00306089
Zotu1993	af302104.1 helicobacter muridarum str. atcc49282 ;k__bacteria;p__proteobacteria;c__epsilonproteobacteria;o__campylobacterales;f__helicobacteraceae;g__helicobacter;s__helicobacter muridarum;superkingdom__bacteria;subphylum__delta/epsilon subdivisions	77.9703	1.34872e-84	319.581	7	26	0	0	0.00365682	0.0155037	0	0	0.00638684
Zotu619	af325727.1 pseudonocardia aurantiaca ;k__bacteria;p__actinobacteria;c__actinomycetia;o__pseudonocardiales;f__pseudonocardiaceae;g__pseudonocardia;s__pseudonocardia aurantiaca;superkingdom__bacteria;	88.1773	2.63174e-144	517.05	29	68	78	1	0.0151497	0.0405481	0.0297065	0.00044482	0.0280233
Zotu1495	af335183.1 geobacter grbiciae str. tacp_5 ;k__bacteria;p__proteobacteria;c__deltaproteobacteria;o__desulfuromonadales;f__geobacteraceae;g__geobacter;s__geobacter grbiciae;superkingdom__bacteria;subphylum__delta/epsilon subdivisions	82.7103	6.11053e-121	439.505	0	0	62	1	0	0	0.0236128	0.00044482	0.00742613
Zotu2109	af335183.1 geobacter grbiciae str. tacp_5 ;k__bacteria;p__proteobacteria;c__deltaproteobacteria;o__desulfuromonadales;f__geobacteraceae;g__geobacter;s__geobacter grbiciae;superkingdom__bacteria;subphylum__delta/epsilon subdivisions	82.9439	5.01583e-122	444.013	1	0	57	0	0.000522403	0	0.0217086	0	0.00741033
Zotu2353	af335183.1 geobacter grbiciae str. tacp_5 ;k__bacteria;p__proteobacteria;c__deltaproteobacteria;o__desulfuromonadales;f__geobacteraceae;g__geobacter;s__geobacter grbiciae;superkingdom__bacteria;subphylum__delta/epsilon subdivisions	83.9161	7.94814e-126	456.637	0	20	0	0	0	0.0119259	0	0	0.00397531
Zotu2873	af335183.1 geobacter grbiciae str. tacp_5 ;k__bacteria;p__proteobacteria;c__deltaproteobacteria;o__desulfuromonadales;f__geobacteraceae;g__geobacter;s__geobacter grbiciae;superkingdom__bacteria;subphylum__delta/epsilon subdivisions	82.9439	5.01583e-122	443.112	1	17	0	0	0.000522403	0.010137	0	0	0.00355314
Zotu1980	af378698.1 paenibacillus turicensis str. mol722 ;k__bacteria;p__firmicutes;c__bacilli;o__bacillales;f__paenibacillaceae;g__paenibacillus;s__paenibacillus turicensis;superkingdom__bacteria	100	0	769.521	4	32	1	0	0.00208961	0.0190815	0.000380852	0	0.00718398
Zotu2815	af382399.1 anaeromyxobacter dehalogenans 2cp_c str. 2cp_c ;k__bacteria;p__proteobacteria;c__deltaproteobacteria;o__myxococcales;f__anaeromyxobacteraceae;g__anaeromyxobacter;s__anaeromyxobacter dehalogenans;superkingdom__bacteria;subphylum__delta/epsilon subdivisions;suborder__cystobacterineae	86.8056	9.72313e-144	515.246	0	0	29	0	0	0	0.0110447	0	0.00368157
Zotu2740	af382399.1 anaeromyxobacter dehalogenans 2cp_c str. 2cp_c ;k__bacteria;p__proteobacteria;c__deltaproteobacteria;o__myxococcales;f__anaeromyxobacteraceae;g__anaeromyxobacter;s__anaeromyxobacter dehalogenans;superkingdom__bacteria;subphylum__delta/epsilon subdivisions;suborder__cystobacterineae	85.514	3.84303e-136	489.999	17	0	0	0	0.00888086	0	0	0	0.00296029
Zotu3138	af385535.1 swab advanced noma lesion clone aw086 ;k__bacteria;p__firmicutes;c__bacilli;o__bacillales;f__planococcaceae;g__solibacillus;s__solibacillus silvestris;superkingdom__bacteria	100	0	771.325	5	23	0	0	0.00261202	0.0137148	0	0	0.00544227
Zotu2140	af399914.1 pirellula staleyi str. atcc 35122 ;k__bacteria;p__planctomycetes;c__planctomycetia;o__pirellulales;f__pirellulaceae;g__pirellula;s__pirellula staleyi; superkingdom__bacteria;	88.6792	4.64211e-154	549.51	50	5	0	0	0.0261202	0.00298148	0	0	0.00970055
Zotu2910	af399914.1 pirellula staleyi str. atcc 35122 ;k__bacteria;p__planctomycetes;c__planctomycetia;o__pirellulales;f__pirellulaceae;g__pirellula;s__pirellula staleyi; superkingdom__bacteria;	88.4434	1.97387e-152	544.1	18	3	10	0	0.00940326	0.00178889	0.00380852	0	0.00500022
Zotu2522	af399914.1 pirellula staleyi str. atcc 35122 ;k__bacteria;p__planctomycetes;c__planctomycetia;o__pirellulales;f__pirellulaceae;g__pirellula;s__pirellula staleyi; superkingdom__bacteria;	86.7925	3.34255e-143	513.443	16	0	16	0	0.00835845	0	0.00609364	0	0.00481736
Zotu2050	af399914.1 pirellula staleyi str. atcc 35122 ;k__bacteria;p__planctomycetes;c__planctomycetia;o__pirellulales;f__pirellulaceae;g__pirellula;s__pirellula staleyi; superkingdom__bacteria;	88.2075	2.40467e-151	540.494	0	0	35	0	0	0	0.0133298	0	0.00444328
Zotu1672	af468221.1 bacillus niacini 3 ;k__bacteria;p__firmicutes;c__bacilli;o__bacillales;f__bacillaceae;g__bacillus;s__bacillus niacini;superkingdom__bacteria	100	0	771.325	12	52	1	0	0.00626884	0.0310074	0.000380852	0	0.0125524
Zotu880	af513967.1 planctomycete clone la4_b40n ;k__bacteria;p__planctomycetes;c__planctomycetia;o__planctomycetales;f__planctomycetaceae;g__planctomyces;s__planctomyces brasiliensis;superkingdom__bacteria	82.0388	1.4659e-109	401.634	124	4	0	1	0.064778	0.00238518	0	0.00044482	0.0219429
Zotu711	af531768.1 achromobacter xylosoxidans ;k__bacteria;p__proteobacteria;c__betaproteobacteria;o__burkholderiales;f__alcaligenaceae;g__achromobacter;s__achromobacter xylosoxidans;superkingdom__bacteria	99.7658	0	765.915	1	201	2	0	0.000522403	0.119855	0.000761705	0	0.0403799
Zotu886	af542054.1 thermomonas hydrothermalis str. sgm_6 ;k__bacteria;p__proteobacteria;c__gammaproteobacteria;o__xanthomonadales;f__xanthomonadaceae;g__thermomonas;s__thermomonas hydrothermalis;superkingdom__bacteria	81.2207	9.56901e-106	389.011	4	0	146	1	0.00208961	0	0.0556044	0.00044482	0.0187865
Zotu855	afipia massiliensis ;k__bacteria;p__proteobacteria;c__alphaproteobacteria;o__hyphomicrobiales;f__nitrobacteraceae;g__afipia;s__afipia massiliensis; superkingdom__bacteria;	100	0	726.241	20	12	101	1	0.0104481	0.00715555	0.0384661	0.00044482	0.0182451
Zotu1786	aj005816.1 thauera linaloolentis str. 47lol ;k__bacteria;p__proteobacteria;c__betaproteobacteria;o__rhodocyclales;f__zoogloeaceae;g__thauera;s__thauera linaloolentis; superkingdom__bacteria;	95.3271	0	675.746	12	9	32	2	0.00626884	0.00536666	0.0121873	0.00088964	0.00705128
Zotu2750	aj006607.2 sulfate_reducing strain isolate str. stp12 ;k__bacteria;p__firmicutes;c__clostridia;o__eubacteriales;f__desulfitobacteriaceae;g__desulfosporosinus;s__desulfosporosinus meridiei; superkingdom__bacteria;	97.8972	0	732.552	0	24	0	1	0	0.0143111	0	0.00044482	0.00432555
Zotu4	aj011771.1 mycobacterium immunogenum mn 3744 ;k__bacteria;p__actinobacteria;c__actinomycetia;o__corynebacteriales;f__mycobacteriaceae;g__mycobacterium;s__mycobacterium immunogenum;superkingdom__bacteria;	100	0	735.257	83	52	99	16944	0.0433595	0.0310074	0.0377044	7.53703	-7.49967
Zotu1604	aj233900.1 cystobacter ferrugineus str. cb fe13 ;k__bacteria;p__proteobacteria;c__deltaproteobacteria;o__myxococcales;f__archangiaceae;g__cystobacter;s__cystobacter ferrugineus; suborder__cystobacterineae;subphylum__delta/epsilon subdivisions;superkingdom__bacteria;	95.3052	0	679.353	51	1	72	0	0.0266426	0.000596296	0.0274214	0	0.0182201
Zotu1598	aj233900.1 cystobacter ferrugineus str. cb fe13 ;k__bacteria;p__proteobacteria;c__deltaproteobacteria;o__myxococcales;f__archangiaceae;g__cystobacter;s__cystobacter ferrugineus; suborder__cystobacterineae;subphylum__delta/epsilon subdivisions;superkingdom__bacteria;	93.8967	0	652.302	18	44	0	0	0.00940326	0.026237	0	0	0.0118801
Zotu2572	aj233900.1 cystobacter ferrugineus str. cb fe13 ;k__bacteria;p__proteobacteria;c__deltaproteobacteria;o__myxococcales;f__archangiaceae;g__cystobacter;s__cystobacter ferrugineus; suborder__cystobacterineae;subphylum__delta/epsilon subdivisions;superkingdom__bacteria;	94.8357	0	670.336	1	22	0	1	0.000522403	0.0131185	0	0.00044482	0.00410215
Zotu2411	aj233902.1 cystobacter ferrugineus str. cb fe27 ;k__bacteria;p__proteobacteria;c__deltaproteobacteria;o__myxococcales;f__archangiaceae;g__cystobacter;s__cystobacter ferrugineus; suborder__cystobacterineae;subphylum__delta/epsilon subdivisions;superkingdom__bacteria;	92.4883	7.38695e-177	625.252	6	21	0	0	0.00313442	0.0125222	0	0	0.00521888
Zotu1205	aj233938.1 chondromyces apiculatus str. cm a14 ;k__bacteria;p__proteobacteria;c__deltaproteobacteria;o__myxococcales;f__polyangiaceae;g__chondromyces;s__chondromyces apiculatus;superkingdom__bacteria;subphylum__delta/epsilon subdivisions;suborder__sorangiineae	87.5878	1.81098e-146	525.165	5	0	104	0	0.00261202	0	0.0396086	0	0.0140736
Zotu2670	aj233938.1 chondromyces apiculatus str. cm a14 ;k__bacteria;p__proteobacteria;c__deltaproteobacteria;o__myxococcales;f__polyangiaceae;g__chondromyces;s__chondromyces apiculatus;superkingdom__bacteria;subphylum__delta/epsilon subdivisions;suborder__sorangiineae	93.4272	0	643.286	18	15	0	0	0.00940326	0.00894444	0	0	0.0061159
Zotu1098	aj233947.1 nannocystis exedens str. na e571 ;k__bacteria;p__proteobacteria;c__deltaproteobacteria;o__myxococcales;f__nannocystaceae;g__nannocystis;s__nannocystis exedens;superkingdom__bacteria;subphylum__delta/epsilon subdivisions;suborder__nannocystineae	82.7423	5.86364e-121	440.407	61	23	0	1	0.0318666	0.0137148	0	0.00044482	0.014749
Zotu621	aj237601.1 desulfobacterium anilini str. dsm 4660 ;k__bacteria;p__proteobacteria;c__deltaproteobacteria;o__desulfobacterales;f__desulfobacteraceae;g__desulfatiglans;s__desulfobacterium anilini;superkingdom__bacteria;subphylum__delta/epsilon subdivisions	85.7477	3.16254e-137	493.606	51	19	145	1	0.0266426	0.0113296	0.0552236	0.00044482	0.0306204
Zotu774	aj237601.1 desulfobacterium anilini str. dsm 4660 ;k__bacteria;p__proteobacteria;c__deltaproteobacteria;o__desulfobacterales;f__desulfobacteraceae;g__desulfatiglans;s__desulfobacterium anilini;superkingdom__bacteria;subphylum__delta/epsilon subdivisions	93.7063	1.17352e-180	638.777	16	2	153	2	0.00835845	0.00119259	0.0582704	0.00088964	0.0217175
Zotu979	aj237601.1 desulfobacterium anilini str. dsm 4660 ;k__bacteria;p__proteobacteria;c__deltaproteobacteria;o__desulfobacterales;f__desulfobacteraceae;g__desulfatiglans;s__desulfobacterium anilini;superkingdom__bacteria;subphylum__delta/epsilon subdivisions	93.6768	0	648.696	47	4	59	1	0.024553	0.00238518	0.0224703	0.00044482	0.0160247
Zotu1019	aj237601.1 desulfobacterium anilini str. dsm 4660 ;k__bacteria;p__proteobacteria;c__deltaproteobacteria;o__desulfobacterales;f__desulfobacteraceae;g__desulfatiglans;s__desulfobacterium anilini;superkingdom__bacteria;subphylum__delta/epsilon subdivisions	93.911	0	654.106	20	1	79	0	0.0104481	0.000596296	0.0300873	0	0.0137106
Zotu1633	aj237601.1 desulfobacterium anilini str. dsm 4660 ;k__bacteria;p__proteobacteria;c__deltaproteobacteria;o__desulfobacterales;f__desulfobacteraceae;g__desulfatiglans;s__desulfobacterium anilini;superkingdom__bacteria;subphylum__delta/epsilon subdivisions	92.5408	3.83625e-174	616.235	21	0	52	0	0.0109705	0	0.0198043	0	0.0102583
Zotu1722	aj237601.1 desulfobacterium anilini str. dsm 4660 ;k__bacteria;p__proteobacteria;c__deltaproteobacteria;o__desulfobacterales;f__desulfobacteraceae;g__desulfatiglans;s__desulfobacterium anilini;superkingdom__bacteria;subphylum__delta/epsilon subdivisions	92.5408	3.83625e-174	616.235	4	0	49	1	0.00208961	0	0.0186618	0.00044482	0.0064723
Zotu2433	aj237601.1 desulfobacterium anilini str. dsm 4660 ;k__bacteria;p__proteobacteria;c__deltaproteobacteria;o__desulfobacterales;f__desulfobacteraceae;g__desulfatiglans;s__desulfobacterium anilini;superkingdom__bacteria;subphylum__delta/epsilon subdivisions	87.6457	4.38102e-148	529.673	3	29	0	0	0.00156721	0.0172926	0	0	0.0062866
Zotu2407	aj237601.1 desulfobacterium anilini str. dsm 4660 ;k__bacteria;p__proteobacteria;c__deltaproteobacteria;o__desulfobacterales;f__desulfobacteraceae;g__desulfatiglans;s__desulfobacterium anilini;superkingdom__bacteria;subphylum__delta/epsilon subdivisions	85.514	3.85276e-136	489.999	24	5	2	0	0.0125377	0.00298148	0.000761705	0	0.00542695
Zotu189	aj237601.1 desulfobacterium anilini str. dsm 4660 ;k__bacteria;p__proteobacteria;c__deltaproteobacteria;o__desulfobacterales;f__desulfobacteraceae;g__desulfatiglans;s__desulfobacterium anilini;superkingdom__bacteria;subphylum__delta/epsilon subdivisions	93.911	0	654.106	130	44	233	475	0.0679124	0.026237	0.0887386	0.21129	-0.150327
Zotu389	aj237755.1 clostridium akagii str. ck58 ;k__bacteria;p__firmicutes;c__clostridia;o__eubacteriales;f__clostridiaceae;g__clostridium;s__clostridium akagii;superkingdom__bacteria;	96.5174	0	663.123	58	258	3	1	0.0302994	0.153844	0.00114256	0.00044482	0.0613173
Zotu509	aj237755.1 clostridium akagii str. ck58 ;k__bacteria;p__firmicutes;c__clostridia;o__eubacteriales;f__clostridiaceae;g__clostridium;s__clostridium akagii;superkingdom__bacteria;	96.2687	0	657.713	54	187	0	0	0.0282098	0.111507	0	0	0.0465724
Zotu942	aj237755.1 clostridium akagii str. ck58 ;k__bacteria;p__firmicutes;c__clostridia;o__eubacteriales;f__clostridiaceae;g__clostridium;s__clostridium akagii;superkingdom__bacteria;	96.7662	0	666.729	3	100	0	1	0.00156721	0.0596296	0	0.00044482	0.0199541
Zotu1310	aj237755.1 clostridium akagii str. ck58 ;k__bacteria;p__firmicutes;c__clostridia;o__eubacteriales;f__clostridiaceae;g__clostridium;s__clostridium akagii;superkingdom__bacteria;	96.5174	0	663.123	5	68	1	0	0.00261202	0.0405481	0.000380852	0	0.0145137
Zotu2627	aj237755.1 clostridium akagii str. ck58 ;k__bacteria;p__firmicutes;c__clostridia;o__eubacteriales;f__clostridiaceae;g__clostridium;s__clostridium akagii;superkingdom__bacteria;	94.0299	1.02954e-174	618.038	14	9	0	0	0.00731365	0.00536666	0	0	0.00422677
Zotu2695	aj237755.1 clostridium akagii str. ck58 ;k__bacteria;p__firmicutes;c__clostridia;o__eubacteriales;f__clostridiaceae;g__clostridium;s__clostridium akagii;superkingdom__bacteria;	94.2786	8.45098e-176	622.547	1	15	0	1	0.000522403	0.00894444	0	0.00044482	0.00271079
Zotu1825	aj237756.2 clostridium acidisoli str. ck74 ;k__bacteria;p__firmicutes;c__clostridia;o__eubacteriales;f__clostridiaceae;g__clostridium;s__clostridium acidisoli;superkingdom__bacteria;	98.7562	0	702.797	6	41	0	0	0.00313442	0.0244481	0	0	0.00919418
Zotu2968	aj237756.2 clostridium acidisoli str. ck74 ;k__bacteria;p__firmicutes;c__clostridia;o__eubacteriales;f__clostridiaceae;g__clostridium;s__clostridium acidisoli;superkingdom__bacteria;	97.7667	0	682.96	2	21	0	0	0.00104481	0.0125222	0	0	0.00452234
Zotu986	aj243891.1 actinomyces canis ;k__bacteria;p__actinobacteria;c__actinomycetia;o__actinomycetales;f__actinomycetaceae;g__actinomyces;s__actinomyces canis;superkingdom__bacteria;	96.6746	0	686.566	1	0	0	120	0.000522403	0	0	0.0533784	-0.0532043
Zotu1209	aj250317.1 paenibacillus cookii str. lmg 18419 ;k__bacteria;p__firmicutes;c__bacilli;o__bacillales;f__paenibacillaceae;g__paenibacillus;s__paenibacillus cookii;superkingdom__bacteria	92.723	1.73724e-178	631.564	16	62	0	0	0.00835845	0.0369703	0	0	0.0151096
Zotu2623	aj250317.1 paenibacillus cookii str. lmg 18419 ;k__bacteria;p__firmicutes;c__bacilli;o__bacillales;f__paenibacillaceae;g__paenibacillus;s__paenibacillus cookii;superkingdom__bacteria	93.4272	0	645.089	11	15	0	0	0.00574644	0.00894444	0	0	0.00489696
Zotu3018	aj276403.1 ureibacillus terrenus str. dsm 12654 th9a ;k__bacteria;p__firmicutes;c__bacilli;o__bacillales;f__planococcaceae;g__ureibacillus;s__ureibacillus terrenus;superkingdom__bacteria	99.2974	0	758.701	2	14	0	0	0.00104481	0.00834814	0	0	0.00313098
Zotu1464	aj276992.1 clostridium uliginosum str. ck55 ;k__bacteria;p__firmicutes;c__clostridia;o__eubacteriales;f__clostridiaceae;g__clostridium;s__clostridium uliginosum;superkingdom__bacteria;	100	0	726.241	34	39	0	0	0.0177617	0.0232555	0	0	0.0136724
Zotu2991	aj276992.1 clostridium uliginosum str. ck55 ;k__bacteria;p__firmicutes;c__clostridia;o__eubacteriales;f__clostridiaceae;g__clostridium;s__clostridium uliginosum;superkingdom__bacteria;	99.7512	0	721.732	1	12	1	0	0.000522403	0.00715555	0.000380852	0	0.00268627
Zotu2476	aj279799.1 sporomusa malonica str. dsm 5090 type ;k__bacteria;p__firmicutes;c__negativicutes;o__selenomonadales;f__sporomusaceae;g__sporomusa;s__sporomusa malonica; superkingdom__bacteria;	89.7436	5.00697e-160	569.347	1	18	0	1	0.000522403	0.0107333	0	0.00044482	0.00330709
Zotu3181	aj292759.1 bdellovibrio hd100 str. hd 100 dsm 50701 ;k__bacteria;p__proteobacteria;c__oligoflexia;o__bdellovibrionales;f__bdellovibrionaceae;g__bdellovibrio;s__bdellovibrio bacteriovorus; superkingdom__bacteria;	89.1358	1.17574e-148	531.477	12	0	0	0	0.00626884	0	0	0	0.00208961
Zotu2044	aj293709.1 actinomadura oligospora str. imsnu 22174t ;k__bacteria;p__actinobacteria;c__actinomycetia;o__streptosporangiales;f__thermomonosporaceae;g__actinomadura;s__actinomadura oligospora;superkingdom__bacteria;	86.6828	3.04274e-137	494.508	8	24	0	0	0.00417923	0.0143111	0	0	0.00616344
Zotu1754	aj293709.1 actinomadura oligospora str. imsnu 22174t ;k__bacteria;p__actinobacteria;c__actinomycetia;o__streptosporangiales;f__thermomonosporaceae;g__actinomadura;s__actinomadura oligospora;superkingdom__bacteria;	86.4407	3.70682e-136	489.999	4	24	1	0	0.00208961	0.0143111	0.000380852	0	0.00559385
Zotu2749	aj295684.1 uranium mining mill tailing isolate str. irt_rs2 ;k__bacteria;p__firmicutes;c__bacilli;o__bacillales;f__bacillaceae;g__bacillus;s__bacillus selenatarsenatis;superkingdom__bacteria	99.7658	0	766.816	4	43	0	0	0.00208961	0.0256407	0	0	0.00924344
Zotu136	aj314919.1 corynebacterium appendicis str. dsm 44531t immib r_3491 ;k__bacteria;p__actinobacteria;c__actinomycetia;o__corynebacteriales;f__corynebacteriaceae;g__corynebacterium;s__corynebacterium appendicis;superkingdom__bacteria;	100	0	737.061	4	5	6	1069	0.00208961	0.00298148	0.00228511	0.475513	-0.473061
Zotu647	aj318917.1 dechloromonas denitrificans str. ed1 ;k__bacteria;p__proteobacteria;c__betaproteobacteria;o__rhodocyclales;f__azonexaceae;g__dechloromonas;s__dechloromonas denitrificans; superkingdom__bacteria;	98.1265	0	735.257	31	0	196	0	0.0161945	0	0.074647	0	0.0302805
Zotu981	aj427628.1 clostridium scatologenes str. fp ;k__bacteria;p__firmicutes;c__clostridia;o__eubacteriales;f__clostridiaceae;g__clostridium;s__clostridium scatologenes;superkingdom__bacteria;	97.5124	0	681.156	12	93	0	0	0.00626884	0.0554555	0	0	0.0205748
Zotu2134	aj427628.1 clostridium scatologenes str. fp ;k__bacteria;p__firmicutes;c__clostridia;o__eubacteriales;f__clostridiaceae;g__clostridium;s__clostridium scatologenes;superkingdom__bacteria;	96.2687	0	657.713	11	56	0	0	0.00574644	0.0333926	0	0	0.0130463
Zotu1465	aj427628.1 clostridium scatologenes str. fp ;k__bacteria;p__firmicutes;c__clostridia;o__eubacteriales;f__clostridiaceae;g__clostridium;s__clostridium scatologenes;superkingdom__bacteria;	96.5174	0	663.123	9	62	0	2	0.00470163	0.0369703	0	0.00088964	0.013001
Zotu2154	aj427628.1 clostridium scatologenes str. fp ;k__bacteria;p__firmicutes;c__clostridia;o__eubacteriales;f__clostridiaceae;g__clostridium;s__clostridium scatologenes;superkingdom__bacteria;	97.0149	0	672.139	3	25	0	1	0.00156721	0.0149074	0	0.00044482	0.00504671
Zotu2708	aj427628.1 clostridium scatologenes str. fp ;k__bacteria;p__firmicutes;c__clostridia;o__eubacteriales;f__clostridiaceae;g__clostridium;s__clostridium scatologenes;superkingdom__bacteria;	98.5075	0	699.19	4	21	0	0	0.00208961	0.0125222	0	0	0.00487061
Zotu3040	aj427628.1 clostridium scatologenes str. fp ;k__bacteria;p__firmicutes;c__clostridia;o__eubacteriales;f__clostridiaceae;g__clostridium;s__clostridium scatologenes;superkingdom__bacteria;	96.5174	0	663.123	5	10	0	0	0.00261202	0.00596296	0	0	0.00285832
Zotu1801	aj429239.1 sphingomonas faeni str. ma_olki ;k__bacteria;p__proteobacteria;c__alphaproteobacteria;o__sphingomonadales;f__sphingomonadaceae;g__sphingomonas;s__sphingomonas faeni;superkingdom__bacteria	100	0	726.241	0	4	42	1	0	0.00238518	0.0159958	0.00044482	0.00568217
Zotu346	aj458496.1 methylosinus trichosporium str. ks24b ;k__bacteria;p__proteobacteria;c__alphaproteobacteria;o__hyphomicrobiales;f__methylocystaceae;g__methylosinus;s__methylosinus trichosporium;superkingdom__bacteria;	100	0	726.241	293	48	0	2	0.153064	0.0286222	0	0.00088964	0.0596725
Zotu924	aj519661.1 uranium mill tailings soil sample clone gubh2_ag_72 proteobacterium ;k__bacteria;p__proteobacteria;c__gammaproteobacteria;o__moraxellales;f__moraxellaceae;g__acinetobacter;s__acinetobacter radioresistens; superkingdom__bacteria;	100	0	773.128	1	0	142	0	0.000522403	0	0.054081	0	0.0182011
Zotu1034	aj563935.1 methylococcus capsulatus str. texas = ncimb 11853 ;k__bacteria;p__proteobacteria;c__gammaproteobacteria;o__methylococcales;f__methylococcaceae;g__methylococcus;s__methylococcus capsulatus;superkingdom__bacteria	96.2617	0	693.78	86	31	0	1	0.0449267	0.0184852	0	0.00044482	0.0206925
Zotu1053	aj563935.1 methylococcus capsulatus str. texas = ncimb 11853 ;k__bacteria;p__proteobacteria;c__gammaproteobacteria;o__methylococcales;f__methylococcaceae;g__methylococcus;s__methylococcus capsulatus;superkingdom__bacteria	93.2084	0	640.581	43	56	1	1	0.0224633	0.0333926	0.000380852	0.00044482	0.0183008
Zotu1589	aj563935.1 methylococcus capsulatus str. texas = ncimb 11853 ;k__bacteria;p__proteobacteria;c__gammaproteobacteria;o__methylococcales;f__methylococcaceae;g__methylococcus;s__methylococcus capsulatus;superkingdom__bacteria	93.4426	0	645.089	78	1	35	0	0.0407475	0.000596296	0.0133298	0	0.0182245
Zotu1167	aj621885.1 desulfovibrio cavernae str. h1m ;k__bacteria;p__proteobacteria;c__deltaproteobacteria;o__desulfovibrionales;f__desulfovibrionaceae;g__desulfovibrio;s__desulfovibrio cavernae;superkingdom__bacteria;subphylum__delta/epsilon subdivisions	89.9061	1.17753e-161	574.758	83	36	1	0	0.0433595	0.0214666	0.000380852	0	0.0217357
Zotu852	aj621885.1 desulfovibrio cavernae str. h1m ;k__bacteria;p__proteobacteria;c__deltaproteobacteria;o__desulfovibrionales;f__desulfovibrionaceae;g__desulfovibrio;s__desulfovibrio cavernae;superkingdom__bacteria;subphylum__delta/epsilon subdivisions	90.3756	2.27316e-164	583.774	24	0	125	0	0.0125377	0	0.0476065	0	0.0200481
Zotu1614	aj621885.1 desulfovibrio cavernae str. h1m ;k__bacteria;p__proteobacteria;c__deltaproteobacteria;o__desulfovibrionales;f__desulfovibrionaceae;g__desulfovibrio;s__desulfovibrio cavernae;superkingdom__bacteria;subphylum__delta/epsilon subdivisions	84.5433	2.962e-131	473.769	2	1	61	0	0.00104481	0.000596296	0.023232	0	0.00829103
Zotu2746	aj621885.1 desulfovibrio cavernae str. h1m ;k__bacteria;p__proteobacteria;c__deltaproteobacteria;o__desulfovibrionales;f__desulfovibrionaceae;g__desulfovibrio;s__desulfovibrio cavernae;superkingdom__bacteria;subphylum__delta/epsilon subdivisions	86.215	5.0114e-141	507.131	1	0	20	0	0.000522403	0	0.00761705	0	0.00271315
Zotu2625	aj630203.1 vibrio ponticus str. 380 ;k__bacteria;p__proteobacteria;c__gammaproteobacteria;o__vibrionales;f__vibrionaceae;g__vibrio;s__vibrio ponticus;superkingdom__bacteria	99.7658	0	766.816	0	19	0	0	0	0.0113296	0	0	0.00377654
Zotu428	aj630292.1 azonexus fungiphilus ;k__bacteria;p__proteobacteria;c__betaproteobacteria;o__rhodocyclales;f__azonexaceae;g__azonexus;s__azonexus fungiphilus; superkingdom__bacteria;	93.911	0	654.106	126	30	179	2	0.0658228	0.0178889	0.0681726	0.00088964	0.0497384
Zotu1476	aj630292.1 azonexus fungiphilus ;k__bacteria;p__proteobacteria;c__betaproteobacteria;o__rhodocyclales;f__azonexaceae;g__azonexus;s__azonexus fungiphilus; superkingdom__bacteria;	93.911	0	654.106	37	34	1	0	0.0193289	0.0202741	0.000380852	0	0.0133279
Zotu1520	aj630292.1 azonexus fungiphilus ;k__bacteria;p__proteobacteria;c__betaproteobacteria;o__rhodocyclales;f__azonexaceae;g__azonexus;s__azonexus fungiphilus; superkingdom__bacteria;	93.6768	0	648.696	1	0	60	0	0.000522403	0	0.0228511	0	0.00779118
Zotu2182	aj715379.1 brevibacillus levickii str. r_12317 ;k__bacteria;p__firmicutes;c__bacilli;o__bacillales;f__paenibacillaceae;g__brevibacillus;s__brevibacillus levickii;superkingdom__bacteria	99.5316	0	762.308	3	27	0	0	0.00156721	0.0161	0	0	0.00588907
Zotu2242	aj811619.1 corallococcus coralloides str. dsm 51461 ;k__bacteria;p__proteobacteria;c__deltaproteobacteria;o__myxococcales;f__myxococcaceae;g__corallococcus;s__corallococcus coralloides;superkingdom__bacteria;subphylum__delta/epsilon subdivisions;suborder__cystobacterineae	94.6009	0	665.828	31	0	0	0	0.0161945	0	0	0	0.00539817
Zotu2580	aj811619.1 corallococcus coralloides str. dsm 51461 ;k__bacteria;p__proteobacteria;c__deltaproteobacteria;o__myxococcales;f__myxococcaceae;g__corallococcus;s__corallococcus coralloides;superkingdom__bacteria;subphylum__delta/epsilon subdivisions;suborder__cystobacterineae	94.3662	0	661.319	0	19	0	0	0	0.0113296	0	0	0.00377654
Zotu126	aj966883.1 prosthecobacter vanneervenii str. dsm 12252 ;k__bacteria;p__verrucomicrobia;c__verrucomicrobiae;o__verrucomicrobiales;f__verrucomicrobiaceae;g__prosthecobacter;s__prosthecobacter vanneervenii;superkingdom__bacteria;superphylum__chlamydiae/verrucomicrobia group	95.7746	0	688.37	2	0	2	1193	0.00104481	0	0.000761705	0.53067	-0.530068
Zotu1244	algidimarina propionica ;k__bacteria;p__proteobacteria;c__deltaproteobacteria;o__deltaproteobacteria;f__deltaproteobacteria;g__algidimarina;s__algidimarina propionica;superkingdom__bacteria;subphylum__delta/epsilon subdivisions	92.7739	1.74606e-178	631.564	43	0	52	0	0.0224633	0	0.0198043	0	0.0140892
Zotu1641	algidimarina propionica ;k__bacteria;p__proteobacteria;c__deltaproteobacteria;o__deltaproteobacteria;f__deltaproteobacteria;g__algidimarina;s__algidimarina propionica;superkingdom__bacteria;subphylum__delta/epsilon subdivisions	82.7506	2.04661e-120	437.702	5	35	1	1	0.00261202	0.0208704	0.000380852	0.00044482	0.00750959
Zotu2117	algidimarina propionica ;k__bacteria;p__proteobacteria;c__deltaproteobacteria;o__deltaproteobacteria;f__deltaproteobacteria;g__algidimarina;s__algidimarina propionica;superkingdom__bacteria;subphylum__delta/epsilon subdivisions	92.5408	2.12714e-177	627.055	11	1	22	1	0.00574644	0.000596296	0.00837875	0.00044482	0.00446234
Zotu2454	algidimarina propionica ;k__bacteria;p__proteobacteria;c__deltaproteobacteria;o__deltaproteobacteria;f__deltaproteobacteria;g__algidimarina;s__algidimarina propionica;superkingdom__bacteria;subphylum__delta/epsilon subdivisions	92.7739	1.74606e-178	630.662	3	0	31	0	0.00156721	0	0.0118064	0	0.00445788
Zotu2367	algidimarina propionica ;k__bacteria;p__proteobacteria;c__deltaproteobacteria;o__deltaproteobacteria;f__deltaproteobacteria;g__algidimarina;s__algidimarina propionica;superkingdom__bacteria;subphylum__delta/epsilon subdivisions	93.007	4.10635e-180	636.072	1	0	26	0	0.000522403	0	0.00990216	0	0.00347485
Zotu277	algisphaera agarilytica ;k__bacteria;p__planctomycetes;c__phycisphaerae;o__phycisphaerales;f__phycisphaeraceae;g__algisphaera;s__algisphaera agarilytica;superkingdom__bacteria	77.9156	1.10411e-85	323.188	41	1	449	0	0.0214185	0.000596296	0.171003	0	0.0643392
Zotu480	algisphaera agarilytica ;k__bacteria;p__planctomycetes;c__phycisphaerae;o__phycisphaerales;f__phycisphaeraceae;g__algisphaera;s__algisphaera agarilytica;superkingdom__bacteria	83.7037	7.93609e-113	413.356	123	101	0	1	0.0642556	0.0602259	0	0.00044482	0.041049
Zotu639	algisphaera agarilytica ;k__bacteria;p__planctomycetes;c__phycisphaerae;o__phycisphaerales;f__phycisphaeraceae;g__algisphaera;s__algisphaera agarilytica;superkingdom__bacteria	78.1638	3.17187e-86	324.089	16	1	173	0	0.00835845	0.000596296	0.0658874	0	0.0249474
Zotu764	algisphaera agarilytica ;k__bacteria;p__planctomycetes;c__phycisphaerae;o__phycisphaerales;f__phycisphaeraceae;g__algisphaera;s__algisphaera agarilytica;superkingdom__bacteria	78.9082	4.11463e-91	341.221	109	23	0	0	0.056942	0.0137148	0	0	0.0235523
Zotu636	algisphaera agarilytica ;k__bacteria;p__planctomycetes;c__phycisphaerae;o__phycisphaerales;f__phycisphaeraceae;g__algisphaera;s__algisphaera agarilytica;superkingdom__bacteria	76.9042	8.46544e-81	306.056	1	0	179	0	0.000522403	0	0.0681726	0	0.0228983
Zotu862	algisphaera agarilytica ;k__bacteria;p__planctomycetes;c__phycisphaerae;o__phycisphaerales;f__phycisphaeraceae;g__algisphaera;s__algisphaera agarilytica;superkingdom__bacteria	77.6675	6.94885e-82	309.662	21	0	110	0	0.0109705	0	0.0418937	0	0.0176214
Zotu1157	algisphaera agarilytica ;k__bacteria;p__planctomycetes;c__phycisphaerae;o__phycisphaerales;f__phycisphaeraceae;g__algisphaera;s__algisphaera agarilytica;superkingdom__bacteria	80.4938	5.35202e-96	356.55	85	0	1	0	0.0444043	0	0.000380852	0	0.0149284
Zotu1088	algisphaera agarilytica ;k__bacteria;p__planctomycetes;c__phycisphaerae;o__phycisphaerales;f__phycisphaeraceae;g__algisphaera;s__algisphaera agarilytica;superkingdom__bacteria	80.6452	6.96153e-101	372.78	85	0	0	0	0.0444043	0	0	0	0.0148014
Zotu963	algisphaera agarilytica ;k__bacteria;p__planctomycetes;c__phycisphaerae;o__phycisphaerales;f__phycisphaeraceae;g__algisphaera;s__algisphaera agarilytica;superkingdom__bacteria	78.4119	2.13143e-88	331.303	21	0	87	1	0.0109705	0	0.0331341	0.00044482	0.0142567
Zotu1190	algisphaera agarilytica ;k__bacteria;p__planctomycetes;c__phycisphaerae;o__phycisphaerales;f__phycisphaeraceae;g__algisphaera;s__algisphaera agarilytica;superkingdom__bacteria	82.134	4.12211e-110	403.438	27	0	49	1	0.0141049	0	0.0186618	0.00044482	0.0104774
Zotu2474	algisphaera agarilytica ;k__bacteria;p__planctomycetes;c__phycisphaerae;o__phycisphaerales;f__phycisphaeraceae;g__algisphaera;s__algisphaera agarilytica;superkingdom__bacteria	80.3483	1.26208e-97	361.96	49	0	1	0	0.0255978	0	0.000380852	0	0.00865954
Zotu1814	algisphaera agarilytica ;k__bacteria;p__planctomycetes;c__phycisphaerae;o__phycisphaerales;f__phycisphaeraceae;g__algisphaera;s__algisphaera agarilytica;superkingdom__bacteria	79.1563	9.67668e-93	345.73	28	14	0	0	0.0146273	0.00834814	0	0	0.00765848
Zotu2677	algisphaera agarilytica ;k__bacteria;p__planctomycetes;c__phycisphaerae;o__phycisphaerales;f__phycisphaeraceae;g__algisphaera;s__algisphaera agarilytica;superkingdom__bacteria	87.1605	5.35702e-134	482.786	12	23	0	0	0.00626884	0.0137148	0	0	0.00666121
Zotu1574	algisphaera agarilytica ;k__bacteria;p__planctomycetes;c__phycisphaerae;o__phycisphaerales;f__phycisphaeraceae;g__algisphaera;s__algisphaera agarilytica;superkingdom__bacteria	77.9156	1.10411e-85	322.286	38	0	0	0	0.0198513	0	0	0	0.00661711
Zotu2636	algisphaera agarilytica ;k__bacteria;p__planctomycetes;c__phycisphaerae;o__phycisphaerales;f__phycisphaeraceae;g__algisphaera;s__algisphaera agarilytica;superkingdom__bacteria	79.4045	7.9431e-94	350.238	12	21	0	0	0.00626884	0.0125222	0	0	0.00626368
Zotu1733	algisphaera agarilytica ;k__bacteria;p__planctomycetes;c__phycisphaerae;o__phycisphaerales;f__phycisphaeraceae;g__algisphaera;s__algisphaera agarilytica;superkingdom__bacteria	81.3896	1.34026e-103	382.699	33	0	0	0	0.0172393	0	0	0	0.00574644
Zotu2229	algisphaera agarilytica ;k__bacteria;p__planctomycetes;c__phycisphaerae;o__phycisphaerales;f__phycisphaeraceae;g__algisphaera;s__algisphaera agarilytica;superkingdom__bacteria	79.1563	1.17568e-91	342.123	5	0	34	0	0.00261202	0	0.012949	0	0.005187
Zotu1998	algisphaera agarilytica ;k__bacteria;p__planctomycetes;c__phycisphaerae;o__phycisphaerales;f__phycisphaeraceae;g__algisphaera;s__algisphaera agarilytica;superkingdom__bacteria	79.3532	1.17568e-91	342.123	29	0	1	0	0.0151497	0	0.000380852	0	0.00517685
Zotu3033	algisphaera agarilytica ;k__bacteria;p__planctomycetes;c__phycisphaerae;o__phycisphaerales;f__phycisphaeraceae;g__algisphaera;s__algisphaera agarilytica;superkingdom__bacteria	78.9082	4.11463e-91	341.221	24	4	0	0	0.0125377	0.00238518	0	0	0.00497429
Zotu2995	algisphaera agarilytica ;k__bacteria;p__planctomycetes;c__phycisphaerae;o__phycisphaerales;f__phycisphaeraceae;g__algisphaera;s__algisphaera agarilytica;superkingdom__bacteria	77.6675	1.34508e-84	318.679	27	0	0	0	0.0141049	0	0	0	0.00470163
Zotu2094	algisphaera agarilytica ;k__bacteria;p__planctomycetes;c__phycisphaerae;o__phycisphaerales;f__phycisphaeraceae;g__algisphaera;s__algisphaera agarilytica;superkingdom__bacteria	82.8784	9.64201e-112	409.749	26	0	0	0	0.0135825	0	0	0	0.00452749
Zotu2436	algisphaera agarilytica ;k__bacteria;p__planctomycetes;c__phycisphaerae;o__phycisphaerales;f__phycisphaeraceae;g__algisphaera;s__algisphaera agarilytica;superkingdom__bacteria	78.66	5.01265e-90	336.713	24	0	1	0	0.0125377	0	0.000380852	0	0.00430618
Zotu2944	algisphaera agarilytica ;k__bacteria;p__planctomycetes;c__phycisphaerae;o__phycisphaerales;f__phycisphaeraceae;g__algisphaera;s__algisphaera agarilytica;superkingdom__bacteria	78.9082	4.11463e-91	340.32	24	0	0	0	0.0125377	0	0	0	0.00417923
Zotu2193	algisphaera agarilytica ;k__bacteria;p__planctomycetes;c__phycisphaerae;o__phycisphaerales;f__phycisphaeraceae;g__algisphaera;s__algisphaera agarilytica;superkingdom__bacteria	78.66	5.01265e-90	336.713	22	0	0	0	0.0114929	0	0	0	0.00383096
Zotu2798	algisphaera agarilytica ;k__bacteria;p__planctomycetes;c__phycisphaerae;o__phycisphaerales;f__phycisphaeraceae;g__algisphaera;s__algisphaera agarilytica;superkingdom__bacteria	78.7129	2.13143e-88	331.303	22	0	0	0	0.0114929	0	0	0	0.00383096
Zotu2753	algisphaera agarilytica ;k__bacteria;p__planctomycetes;c__phycisphaerae;o__phycisphaerales;f__phycisphaeraceae;g__algisphaera;s__algisphaera agarilytica;superkingdom__bacteria	78.4119	2.13143e-88	332.204	18	3	0	0	0.00940326	0.00178889	0	0	0.00373072
Zotu2360	algisphaera agarilytica ;k__bacteria;p__planctomycetes;c__phycisphaerae;o__phycisphaerales;f__phycisphaeraceae;g__algisphaera;s__algisphaera agarilytica;superkingdom__bacteria	78.9604	1.74959e-89	335.811	19	0	0	0	0.00992566	0	0	0	0.00330855
Zotu2814	algisphaera agarilytica ;k__bacteria;p__planctomycetes;c__phycisphaerae;o__phycisphaerales;f__phycisphaeraceae;g__algisphaera;s__algisphaera agarilytica;superkingdom__bacteria	79.4045	7.9431e-94	349.336	14	0	0	0	0.00731365	0	0	0	0.00243788
Zotu3101	algisphaera agarilytica ;k__bacteria;p__planctomycetes;c__phycisphaerae;o__phycisphaerales;f__phycisphaeraceae;g__algisphaera;s__algisphaera agarilytica;superkingdom__bacteria	79.6526	1.86804e-95	354.747	13	0	0	0	0.00679124	0	0	0	0.00226375
Zotu70	algisphaera agarilytica ;k__bacteria;p__planctomycetes;c__phycisphaerae;o__phycisphaerales;f__phycisphaeraceae;g__algisphaera;s__algisphaera agarilytica;superkingdom__bacteria	85.1117	2.13342e-126	457.539	4	3	5	1836	0.00208961	0.00178889	0.00190426	0.81669	-0.814762
Zotu483	algorimarina butyrica ;k__bacteria;p__proteobacteria;c__deltaproteobacteria;o__desulfobacterales;f__desulfobacteraceae;g__algorimarina;s__algorimarina butyrica;superkingdom__bacteria;subphylum__delta/epsilon subdivisions	90.9091	6.49627e-165	585.578	14	7	252	4	0.00731365	0.00417407	0.0959748	0.00177928	0.0340415
Zotu2380	alicyclobacillus aeris ;k__bacteria;p__firmicutes;c__bacilli;o__bacillales;f__alicyclobacillaceae;g__alicyclobacillus;s__alicyclobacillus aeris;superkingdom__bacteria	96.729	0	710.01	18	42	0	0	0.00940326	0.0250444	0	0	0.0114826
Zotu2568	alicyclobacillus aeris ;k__bacteria;p__firmicutes;c__bacilli;o__bacillales;f__alicyclobacillaceae;g__alicyclobacillus;s__alicyclobacillus aeris;superkingdom__bacteria	99.2991	0	759.603	2	34	0	1	0.00104481	0.0202741	0	0.00044482	0.00666147
Zotu3003	alicyclobacillus macrosporangiidus ;k__bacteria;p__firmicutes;c__bacilli;o__bacillales;f__alicyclobacillaceae;g__alicyclobacillus;s__alicyclobacillus macrosporangiidus;superkingdom__bacteria	100	0	773.128	0	13	0	0	0	0.00775185	0	0	0.00258395
Zotu2609	alicyclobacillus tolerans ;k__bacteria;p__firmicutes;c__bacilli;o__bacillales;f__alicyclobacillaceae;g__alicyclobacillus;s__alicyclobacillus tolerans;superkingdom__bacteria	88.5246	4.67763e-154	550.412	19	39	0	0	0.00992566	0.0232555	0	0	0.0110604
Zotu3146	alkalibacter saccharofermentans ;k__bacteria;p__firmicutes;c__clostridia;o__eubacteriales;f__eubacteriaceae;g__alkalibacter;s__alkalibacter saccharofermentans;superkingdom__bacteria;	84.8193	4.26278e-129	467.457	3	18	0	0	0.00156721	0.0107333	0	0	0.00410018
Zotu742	alkaliphilus metalliredigens qymf ;k__bacteria;p__firmicutes;c__clostridia;o__eubacteriales;f__clostridiaceae;g__alkaliphilus;s__alkaliphilus metalliredigens;superkingdom__bacteria;	83.871	6.49673e-114	416.963	89	54	7	0	0.0464939	0.0322	0.00266597	0	0.0271199
Zotu22	alkalitalea saponilacus ;k__bacteria;p__bacteroidetes;c__bacteroidia;o__marinilabiliales;f__marinilabiliaceae;g__alkalitalea;s__alkalitalea saponilacus; superkingdom__bacteria;	88.4434	8.35031e-151	539.592	1410	588	1699	17	0.736589	0.350622	0.647068	0.00756194	0.570531
Zotu139	alkalitalea saponilacus ;k__bacteria;p__bacteroidetes;c__bacteroidia;o__marinilabiliales;f__marinilabiliaceae;g__alkalitalea;s__alkalitalea saponilacus; superkingdom__bacteria;	88.1517	2.91454e-150	536.887	354	100	447	4	0.184931	0.0596296	0.170241	0.00177928	0.136488
Zotu376	alkalitalea saponilacus ;k__bacteria;p__bacteroidetes;c__bacteroidia;o__marinilabiliales;f__marinilabiliaceae;g__alkalitalea;s__alkalitalea saponilacus; superkingdom__bacteria;	89.5735	2.09676e-158	563.937	46	0	282	0	0.0240306	0	0.1074	0	0.0438103
Zotu919	alkalitalea saponilacus ;k__bacteria;p__bacteroidetes;c__bacteroidia;o__marinilabiliales;f__marinilabiliaceae;g__alkalitalea;s__alkalitalea saponilacus; superkingdom__bacteria;	89.0995	1.08615e-155	554.921	93	40	0	0	0.0485835	0.0238518	0	0	0.0241451
Zotu1635	alkalitalea saponilacus ;k__bacteria;p__bacteroidetes;c__bacteroidia;o__marinilabiliales;f__marinilabiliaceae;g__alkalitalea;s__alkalitalea saponilacus; superkingdom__bacteria;	87.2038	7.82081e-145	518.853	46	26	1	0	0.0240306	0.0155037	0.000380852	0	0.013305
Zotu1937	alkalitalea saponilacus ;k__bacteria;p__bacteroidetes;c__bacteroidia;o__marinilabiliales;f__marinilabiliaceae;g__alkalitalea;s__alkalitalea saponilacus; superkingdom__bacteria;	88.4161	1.01728e-149	535.985	34	35	1	0	0.0177617	0.0208704	0.000380852	0	0.0130043
Zotu1293	alkalitalea saponilacus ;k__bacteria;p__bacteroidetes;c__bacteroidia;o__marinilabiliales;f__marinilabiliaceae;g__alkalitalea;s__alkalitalea saponilacus; superkingdom__bacteria;	89.3365	8.91566e-157	559.429	62	5	1	0	0.032389	0.00298148	0.000380852	0	0.0119171
Zotu1906	alkalitalea saponilacus ;k__bacteria;p__bacteroidetes;c__bacteroidia;o__marinilabiliales;f__marinilabiliaceae;g__alkalitalea;s__alkalitalea saponilacus; superkingdom__bacteria;	87.6777	1.50977e-147	527.87	24	0	14	0	0.0125377	0	0.00533193	0	0.00595654
Zotu1971	alkalitalea saponilacus ;k__bacteria;p__bacteroidetes;c__bacteroidia;o__marinilabiliales;f__marinilabiliaceae;g__alkalitalea;s__alkalitalea saponilacus; superkingdom__bacteria;	87.9147	1.2393e-148	532.378	6	2	37	1	0.00313442	0.00119259	0.0140915	0.00044482	0.0056947
Zotu2576	alkalitalea saponilacus ;k__bacteria;p__bacteroidetes;c__bacteroidia;o__marinilabiliales;f__marinilabiliaceae;g__alkalitalea;s__alkalitalea saponilacus; superkingdom__bacteria;	86.7299	4.05128e-142	509.836	26	0	0	0	0.0135825	0	0	0	0.00452749
Zotu3201	alkalitalea saponilacus ;k__bacteria;p__bacteroidetes;c__bacteroidia;o__marinilabiliales;f__marinilabiliaceae;g__alkalitalea;s__alkalitalea saponilacus; superkingdom__bacteria;	87.9433	5.26962e-147	526.968	22	0	0	0	0.0114929	0	0	0	0.00383096
Zotu2962	alkalitalea saponilacus ;k__bacteria;p__bacteroidetes;c__bacteroidia;o__marinilabiliales;f__marinilabiliaceae;g__alkalitalea;s__alkalitalea saponilacus; superkingdom__bacteria;	87.4408	6.41971e-146	522.46	15	0	0	0	0.00783605	0	0	0	0.00261202
Zotu322	allokutzneria multivorans ;k__bacteria;p__actinobacteria;c__actinomycetia;o__pseudonocardiales;f__pseudonocardiaceae;g__allokutzneria;s__allokutzneria multivorans;superkingdom__bacteria;	87.6847	1.66081e-140	504.426	159	190	48	1	0.0830621	0.113296	0.0182809	0.00044482	0.0711016
Zotu1584	allokutzneria multivorans ;k__bacteria;p__actinobacteria;c__actinomycetia;o__pseudonocardiales;f__pseudonocardiaceae;g__allokutzneria;s__allokutzneria multivorans;superkingdom__bacteria;	87.4384	7.06194e-139	499.016	10	32	0	0	0.00522403	0.0190815	0	0	0.00810183
Zotu1771	alsobacter metallidurans ;k__bacteria;p__proteobacteria;c__alphaproteobacteria;o__hyphomicrobiales;f__alsobacteraceae;g__alsobacter;s__alsobacter metallidurans;superkingdom__bacteria;	98.7562	0	703.698	51	13	1	0	0.0266426	0.00775185	0.000380852	0	0.0115918
Zotu1879	am114432.1 interactions u(vi) added natural dependance on various incubation conditions soil uranium mining waste pile clone jg35+u1_ag125 ;k__bacteria;p__firmicutes;c__clostridia;o__eubacteriales;f__desulfitobacteriaceae;g__desulfosporosinus;s__desulfosporosinus meridiei; superkingdom__bacteria;	100	0	773.128	7	46	1	0	0.00365682	0.0274296	0.000380852	0	0.0104891
Zotu2308	am114432.1 interactions u(vi) added natural dependance on various incubation conditions soil uranium mining waste pile clone jg35+u1_ag125 ;k__bacteria;p__firmicutes;c__clostridia;o__eubacteriales;f__desulfitobacteriaceae;g__desulfosporosinus;s__desulfosporosinus meridiei; superkingdom__bacteria;	88.5514	1.98395e-152	544.1	3	26	0	0	0.00156721	0.0155037	0	0	0.0056903
Zotu2659	am114432.1 interactions u(vi) added natural dependance on various incubation conditions soil uranium mining waste pile clone jg35+u1_ag125 ;k__bacteria;p__firmicutes;c__clostridia;o__eubacteriales;f__desulfitobacteriaceae;g__desulfosporosinus;s__desulfosporosinus meridiei; superkingdom__bacteria;	88.3178	2.41694e-151	540.494	1	18	0	0	0.000522403	0.0107333	0	0	0.00375191
Zotu84	am157439.1 staphylococcus epidermidis mother v4 ;k__bacteria;p__firmicutes;c__bacilli;o__bacillales;f__staphylococcaceae;g__staphylococcus;s__staphylococcus epidermidis;superkingdom__bacteria	100	0	771.325	5	46	517	1023	0.00261202	0.0274296	0.196901	0.455051	-0.379404
Zotu677	am176518.1 peptostreptococcus micros gpac015 ;k__bacteria;p__firmicutes;c__tissierellia;o__tissierellales;f__peptoniphilaceae;g__parvimonas;s__parvimonas micra; superkingdom__bacteria;	91.3151	1.98924e-158	563.937	0	224	1	0	0	0.13357	0.000380852	0	0.0446504
Zotu448	am261414.1 clostridium nitrophenolicum str. 1d ;k__bacteria;p__firmicutes;c__clostridia;o__eubacteriales;f__clostridiaceae;g__clostridium;s__clostridium nitrophenolicum;superkingdom__bacteria;	97.2637	0	676.648	85	228	1	0	0.0444043	0.135955	0.000380852	0	0.0602469
Zotu510	am261414.1 clostridium nitrophenolicum str. 1d ;k__bacteria;p__firmicutes;c__clostridia;o__eubacteriales;f__clostridiaceae;g__clostridium;s__clostridium nitrophenolicum;superkingdom__bacteria;	93.5323	5.33315e-172	609.022	74	80	117	2	0.0386578	0.0477037	0.0445597	0.00088964	0.0427508
Zotu609	am261414.1 clostridium nitrophenolicum str. 1d ;k__bacteria;p__firmicutes;c__clostridia;o__eubacteriales;f__clostridiaceae;g__clostridium;s__clostridium nitrophenolicum;superkingdom__bacteria;	97.0149	0	672.139	38	161	2	1	0.0198513	0.0960036	0.000761705	0.00044482	0.0384274
Zotu791	am261414.1 clostridium nitrophenolicum str. 1d ;k__bacteria;p__firmicutes;c__clostridia;o__eubacteriales;f__clostridiaceae;g__clostridium;s__clostridium nitrophenolicum;superkingdom__bacteria;	96.2687	0	657.713	27	103	0	0	0.0141049	0.0614185	0	0	0.0251745
Zotu1252	am261414.1 clostridium nitrophenolicum str. 1d ;k__bacteria;p__firmicutes;c__clostridia;o__eubacteriales;f__clostridiaceae;g__clostridium;s__clostridium nitrophenolicum;superkingdom__bacteria;	97.5124	0	681.156	10	82	1	1	0.00522403	0.0488963	0.000380852	0.00044482	0.0177222
Zotu1307	am261414.1 clostridium nitrophenolicum str. 1d ;k__bacteria;p__firmicutes;c__clostridia;o__eubacteriales;f__clostridiaceae;g__clostridium;s__clostridium nitrophenolicum;superkingdom__bacteria;	96.5174	0	663.123	19	33	0	0	0.00992566	0.0196778	0	0	0.00986781
Zotu3054	am261414.1 clostridium nitrophenolicum str. 1d ;k__bacteria;p__firmicutes;c__clostridia;o__eubacteriales;f__clostridiaceae;g__clostridium;s__clostridium nitrophenolicum;superkingdom__bacteria;	98.7562	0	702.797	16	25	1	1	0.00835845	0.0149074	0.000380852	0.00044482	0.00743741
Zotu1647	am261414.1 clostridium nitrophenolicum str. 1d ;k__bacteria;p__firmicutes;c__clostridia;o__eubacteriales;f__clostridiaceae;g__clostridium;s__clostridium nitrophenolicum;superkingdom__bacteria;	94.2786	8.45098e-176	621.645	13	26	0	0	0.00679124	0.0155037	0	0	0.00743164
Zotu2221	am261414.1 clostridium nitrophenolicum str. 1d ;k__bacteria;p__firmicutes;c__clostridia;o__eubacteriales;f__clostridiaceae;g__clostridium;s__clostridium nitrophenolicum;superkingdom__bacteria;	95.2736	0	640.581	0	36	0	0	0	0.0214666	0	0	0.00715555
Zotu1855	am261414.1 clostridium nitrophenolicum str. 1d ;k__bacteria;p__firmicutes;c__clostridia;o__eubacteriales;f__clostridiaceae;g__clostridium;s__clostridium nitrophenolicum;superkingdom__bacteria;	97.0149	0	672.139	10	27	0	0	0.00522403	0.0161	0	0	0.00710801
Zotu3056	am261414.1 clostridium nitrophenolicum str. 1d ;k__bacteria;p__firmicutes;c__clostridia;o__eubacteriales;f__clostridiaceae;g__clostridium;s__clostridium nitrophenolicum;superkingdom__bacteria;	95.0249	3.83674e-180	636.072	0	12	0	0	0	0.00715555	0	0	0.00238518
Zotu2758	am498380.1 allochromatium phaeobacterium ;k__bacteria;p__proteobacteria;c__gammaproteobacteria;o__chromatiales;f__chromatiaceae;g__allochromatium;s__allochromatium vinosum;superkingdom__bacteria	80.6527	1.17767e-104	385.404	9	10	1	0	0.00470163	0.00596296	0.000380852	0	0.00368181
Zotu1972	am503357.2 bacillus isabelae str. cvs_8 ;k__bacteria;p__firmicutes;c__bacilli;o__bacillales;f__bacillaceae;g__bacillus;s__bacillus isabelae;superkingdom__bacteria	92.757	5.00255e-179	633.367	8	32	0	0	0.00417923	0.0190815	0	0	0.00775356
Zotu1417	am691116.1 roseomonas lacus str. bf3 ;k__bacteria;p__proteobacteria;c__alphaproteobacteria;o__rhodospirillales;f__acetobacteraceae;g__roseomonas;s__roseomonas lacus;superkingdom__bacteria	99.2537	0	712.715	51	0	1	0	0.0266426	0	0.000380852	0	0.00900781
Zotu2823	am691116.1 roseomonas lacus str. bf3 ;k__bacteria;p__proteobacteria;c__alphaproteobacteria;o__rhodospirillales;f__acetobacteraceae;g__roseomonas;s__roseomonas lacus;superkingdom__bacteria	98.01	0	690.173	17	0	0	0	0.00888086	0	0	0	0.00296029
Zotu7	am697149.1 sequencing libraries indoor dust clone bf0002b099 ;k__bacteria;p__firmicutes;c__clostridia;o__eubacteriales;f__clostridiaceae;g__clostridium;s__clostridium bowmanii;superkingdom__bacteria;	100	0	726.241	1644	5100	553	2146	0.858831	3.04111	0.210611	0.954584	0.4156
Zotu41	am697149.1 sequencing libraries indoor dust clone bf0002b099 ;k__bacteria;p__firmicutes;c__clostridia;o__eubacteriales;f__clostridiaceae;g__clostridium;s__clostridium bowmanii;superkingdom__bacteria;	98.5075	0	699.19	449	1373	294	11	0.234559	0.818714	0.111971	0.00489302	0.383522
Zotu85	am697149.1 sequencing libraries indoor dust clone bf0002b099 ;k__bacteria;p__firmicutes;c__clostridia;o__eubacteriales;f__clostridiaceae;g__clostridium;s__clostridium bowmanii;superkingdom__bacteria;	99.2537	0	711.814	194	1015	8	7	0.101346	0.60524	0.00304682	0.00311374	0.233431
Zotu223	am697149.1 sequencing libraries indoor dust clone bf0002b099 ;k__bacteria;p__firmicutes;c__clostridia;o__eubacteriales;f__clostridiaceae;g__clostridium;s__clostridium bowmanii;superkingdom__bacteria;	98.7562	0	703.698	124	405	2	0	0.064778	0.2415	0.000761705	0	0.102347
Zotu364	am697149.1 sequencing libraries indoor dust clone bf0002b099 ;k__bacteria;p__firmicutes;c__clostridia;o__eubacteriales;f__clostridiaceae;g__clostridium;s__clostridium bowmanii;superkingdom__bacteria;	99.005	0	708.207	76	235	2	2	0.0397026	0.14013	0.000761705	0.00088964	0.0593083
Zotu967	am697149.1 sequencing libraries indoor dust clone bf0002b099 ;k__bacteria;p__firmicutes;c__clostridia;o__eubacteriales;f__clostridiaceae;g__clostridium;s__clostridium bowmanii;superkingdom__bacteria;	96.0199	0	654.106	21	102	0	2	0.0109705	0.0608222	0	0.00088964	0.0230412
Zotu1126	am697149.1 sequencing libraries indoor dust clone bf0002b099 ;k__bacteria;p__firmicutes;c__clostridia;o__eubacteriales;f__clostridiaceae;g__clostridium;s__clostridium bowmanii;superkingdom__bacteria;	97.7612	0	685.665	22	82	2	0	0.0114929	0.0488963	0.000761705	0	0.0203836
Zotu1441	am697149.1 sequencing libraries indoor dust clone bf0002b099 ;k__bacteria;p__firmicutes;c__clostridia;o__eubacteriales;f__clostridiaceae;g__clostridium;s__clostridium bowmanii;superkingdom__bacteria;	94.7761	1.63142e-178	631.564	15	46	1	0	0.00783605	0.0274296	0.000380852	0	0.0118822
Zotu2160	am697149.1 sequencing libraries indoor dust clone bf0002b099 ;k__bacteria;p__firmicutes;c__clostridia;o__eubacteriales;f__clostridiaceae;g__clostridium;s__clostridium bowmanii;superkingdom__bacteria;	96.0199	0	654.106	0	41	0	0	0	0.0244481	0	0	0.00814938
Zotu2296	am697149.1 sequencing libraries indoor dust clone bf0002b099 ;k__bacteria;p__firmicutes;c__clostridia;o__eubacteriales;f__clostridiaceae;g__clostridium;s__clostridium bowmanii;superkingdom__bacteria;	94.2786	8.45098e-176	621.645	21	11	0	0	0.0109705	0.00655925	0	0	0.00584324
Zotu2675	am697149.1 sequencing libraries indoor dust clone bf0002b099 ;k__bacteria;p__firmicutes;c__clostridia;o__eubacteriales;f__clostridiaceae;g__clostridium;s__clostridium bowmanii;superkingdom__bacteria;	97.5124	0	681.156	1	23	1	0	0.000522403	0.0137148	0.000380852	0	0.00487269
Zotu3183	am697149.1 sequencing libraries indoor dust clone bf0002b099 ;k__bacteria;p__firmicutes;c__clostridia;o__eubacteriales;f__clostridiaceae;g__clostridium;s__clostridium bowmanii;superkingdom__bacteria;	95.7711	0	649.597	0	14	0	0	0	0.00834814	0	0	0.00278271
Zotu3182	am713394.1 heterogeneity microorganisms sediments caused ph coal_mining lake sediment fe(iii)_reducing enrichment clone d47 ;k__bacteria;p__firmicutes;c__clostridia;o__eubacteriales;f__desulfitobacteriaceae;g__desulfosporosinus;s__desulfosporosinus meridiei; superkingdom__bacteria;	98.8318	0	750.586	10	16	0	0	0.00522403	0.00954073	0	0	0.00492159
Zotu244	am773309.1 anabaenopsis elenkinii str. niva_cya 501 ;k__bacteria;p__cyanobacteria;c__cyanobacteria;o__nostocales;f__aphanizomenonaceae;g__anabaenopsis;s__anabaenopsis elenkinii; superkingdom__bacteria;	100	0	731.651	259	135	1	0	0.135302	0.0804999	0.000380852	0	0.0720611
Zotu93	am902750.1 mycobacterium mucogenicum str. ccu g47451 ;k__bacteria;p__actinobacteria;c__actinomycetia;o__corynebacteriales;f__mycobacteriaceae;g__mycobacterium;s__mycobacterium mucogenicum;superkingdom__bacteria;	98.0344	0	699.19	521	367	286	15	0.272172	0.218841	0.108924	0.0066723	0.193307
Zotu219	am902750.1 mycobacterium mucogenicum str. ccu g47451 ;k__bacteria;p__actinobacteria;c__actinomycetia;o__corynebacteriales;f__mycobacteriaceae;g__mycobacterium;s__mycobacterium mucogenicum;superkingdom__bacteria;	98.2801	0	703.698	158	125	240	4	0.0825397	0.074537	0.0914045	0.00177928	0.0810478
Zotu159	am992194.1 micrococcus luteus ts iw 23 ;k__bacteria;p__actinobacteria;c__actinomycetia;o__micrococcales;f__micrococcaceae;g__micrococcus;s__micrococcus luteus;superkingdom__bacteria;	100	0	735.257	6	5	1	863	0.00313442	0.00298148	0.000380852	0.38388	-0.381714
Zotu665	ammonifex thiophilus ;k__bacteria;p__firmicutes;c__clostridia;o__thermoanaerobacterales;f__thermoanaerobacteraceae;g__ammonifex;s__ammonifex thiophilus;superkingdom__bacteria	82.1596	1.26059e-110	405.241	0	0	251	0	0	0	0.0955939	0	0.0318646
Zotu2850	ammonifex thiophilus ;k__bacteria;p__firmicutes;c__clostridia;o__thermoanaerobacterales;f__thermoanaerobacteraceae;g__ammonifex;s__ammonifex thiophilus;superkingdom__bacteria	80.1418	1.18065e-104	385.404	2	0	19	0	0.00104481	0	0.00723619	0	0.00276033
Zotu331	anabaena flos_aquae tac475 ;k__bacteria;p__cyanobacteria;c__cyanobacteria;o__nostocales;f__aphanizomenonaceae;g__dolichospermum;s__dolichospermum flos_aquae; superkingdom__bacteria;	100	0	731.651	80	61	277	0	0.0417923	0.036374	0.105496	0	0.0612208
Zotu2432	anabaena mendotae ;k__bacteria;p__cyanobacteria;c__cyanobacteria;o__nostocales;f__aphanizomenonaceae;g__dolichospermum;s__anabaena mendotae; superkingdom__bacteria;	100	0	731.651	7	15	1	0	0.00365682	0.00894444	0.000380852	0	0.00432737
Zotu174	anaerobacterium chartisolvens ;k__bacteria;p__firmicutes;c__clostridia;o__eubacteriales;f__oscillospiraceae;g__anaerobacterium;s__anaerobacterium chartisolvens;superkingdom__bacteria;	95.0495	0	639.679	105	551	6	2	0.0548523	0.328559	0.00228511	0.00088964	0.127676
Zotu570	anaerobacterium chartisolvens ;k__bacteria;p__firmicutes;c__clostridia;o__eubacteriales;f__oscillospiraceae;g__anaerobacterium;s__anaerobacterium chartisolvens;superkingdom__bacteria;	93.5961	6.54978e-171	605.415	89	151	1	0	0.0464939	0.0900407	0.000380852	0	0.0456385
Zotu542	anaerobacterium chartisolvens ;k__bacteria;p__firmicutes;c__clostridia;o__eubacteriales;f__oscillospiraceae;g__anaerobacterium;s__anaerobacterium chartisolvens;superkingdom__bacteria;	95.297	0	643.286	34	193	4	0	0.0177617	0.115085	0.00152341	0	0.0447901
Zotu850	anaerobacterium chartisolvens ;k__bacteria;p__firmicutes;c__clostridia;o__eubacteriales;f__oscillospiraceae;g__anaerobacterium;s__anaerobacterium chartisolvens;superkingdom__bacteria;	95.297	0	639.679	8	120	0	0	0.00417923	0.0715555	0	0	0.0252449
Zotu1364	anaerobacterium chartisolvens ;k__bacteria;p__firmicutes;c__clostridia;o__eubacteriales;f__oscillospiraceae;g__anaerobacterium;s__anaerobacterium chartisolvens;superkingdom__bacteria;	95.7921	0	649.597	11	72	0	0	0.00574644	0.0429333	0	0	0.0162266
Zotu1309	anaerobacterium chartisolvens ;k__bacteria;p__firmicutes;c__clostridia;o__eubacteriales;f__oscillospiraceae;g__anaerobacterium;s__anaerobacterium chartisolvens;superkingdom__bacteria;	94.5545	1.64024e-178	630.662	9	67	0	0	0.00470163	0.0399518	0	0	0.0148845
Zotu2372	anaerobacterium chartisolvens ;k__bacteria;p__firmicutes;c__clostridia;o__eubacteriales;f__oscillospiraceae;g__anaerobacterium;s__anaerobacterium chartisolvens;superkingdom__bacteria;	95.5556	0	646.892	26	50	0	1	0.0135825	0.0298148	0	0.00044482	0.0140209
Zotu1354	anaerobacterium chartisolvens ;k__bacteria;p__firmicutes;c__clostridia;o__eubacteriales;f__oscillospiraceae;g__anaerobacterium;s__anaerobacterium chartisolvens;superkingdom__bacteria;	98.2673	0	698.288	9	19	60	0	0.00470163	0.0113296	0.0228511	0	0.0129608
Zotu1951	anaerobacterium chartisolvens ;k__bacteria;p__firmicutes;c__clostridia;o__eubacteriales;f__oscillospiraceae;g__anaerobacterium;s__anaerobacterium chartisolvens;superkingdom__bacteria;	95.297	0	640.581	9	55	1	1	0.00470163	0.0327963	0.000380852	0.00044482	0.0121814
Zotu2272	anaerobacterium chartisolvens ;k__bacteria;p__firmicutes;c__clostridia;o__eubacteriales;f__oscillospiraceae;g__anaerobacterium;s__anaerobacterium chartisolvens;superkingdom__bacteria;	93.8119	4.38955e-173	612.628	20	47	1	2	0.0104481	0.0280259	0.000380852	0.00088964	0.012062
Zotu1410	anaerobacterium chartisolvens ;k__bacteria;p__firmicutes;c__clostridia;o__eubacteriales;f__oscillospiraceae;g__anaerobacterium;s__anaerobacterium chartisolvens;superkingdom__bacteria;	93.5802	2.27384e-170	603.611	34	23	0	0	0.0177617	0.0137148	0	0	0.0104922
Zotu1773	anaerobacterium chartisolvens ;k__bacteria;p__firmicutes;c__clostridia;o__eubacteriales;f__oscillospiraceae;g__anaerobacterium;s__anaerobacterium chartisolvens;superkingdom__bacteria;	93.8272	1.26441e-173	614.432	2	48	1	0	0.00104481	0.0286222	0.000380852	0	0.010016
Zotu2325	anaerobacterium chartisolvens ;k__bacteria;p__firmicutes;c__clostridia;o__eubacteriales;f__oscillospiraceae;g__anaerobacterium;s__anaerobacterium chartisolvens;superkingdom__bacteria;	94.321	2.96562e-175	619.842	16	34	1	0	0.00835845	0.0202741	0.000380852	0	0.00967112
Zotu1438	anaerobacterium chartisolvens ;k__bacteria;p__firmicutes;c__clostridia;o__eubacteriales;f__oscillospiraceae;g__anaerobacterium;s__anaerobacterium chartisolvens;superkingdom__bacteria;	94.8148	4.712e-179	633.367	10	38	0	0	0.00522403	0.0226592	0	0	0.00929442
Zotu2255	anaerobacterium chartisolvens ;k__bacteria;p__firmicutes;c__clostridia;o__eubacteriales;f__oscillospiraceae;g__anaerobacterium;s__anaerobacterium chartisolvens;superkingdom__bacteria;	96.2963	0	659.516	18	30	0	0	0.00940326	0.0178889	0	0	0.00909738
Zotu2098	anaerobacterium chartisolvens ;k__bacteria;p__firmicutes;c__clostridia;o__eubacteriales;f__oscillospiraceae;g__anaerobacterium;s__anaerobacterium chartisolvens;superkingdom__bacteria;	94.5679	5.74039e-178	628.859	11	33	0	0	0.00574644	0.0196778	0	0	0.00847473
Zotu1988	anaerobacterium chartisolvens ;k__bacteria;p__firmicutes;c__clostridia;o__eubacteriales;f__oscillospiraceae;g__anaerobacterium;s__anaerobacterium chartisolvens;superkingdom__bacteria;	95.0495	3.84711e-180	636.072	3	37	0	0	0.00156721	0.0220629	0	0	0.00787672
Zotu1724	anaerobacterium chartisolvens ;k__bacteria;p__firmicutes;c__clostridia;o__eubacteriales;f__oscillospiraceae;g__anaerobacterium;s__anaerobacterium chartisolvens;superkingdom__bacteria;	96.2963	0	660.418	7	32	0	0	0.00365682	0.0190815	0	0	0.00757943
Zotu1654	anaerobacterium chartisolvens ;k__bacteria;p__firmicutes;c__clostridia;o__eubacteriales;f__oscillospiraceae;g__anaerobacterium;s__anaerobacterium chartisolvens;superkingdom__bacteria;	94.3069	6.97448e-177	625.252	9	30	0	0	0.00470163	0.0178889	0	0	0.00753017
Zotu1875	anaerobacterium chartisolvens ;k__bacteria;p__firmicutes;c__clostridia;o__eubacteriales;f__oscillospiraceae;g__anaerobacterium;s__anaerobacterium chartisolvens;superkingdom__bacteria;	95.0739	5.725e-178	628.859	0	37	0	0	0	0.0220629	0	0	0.00735431
Zotu1893	anaerobacterium chartisolvens ;k__bacteria;p__firmicutes;c__clostridia;o__eubacteriales;f__oscillospiraceae;g__anaerobacterium;s__anaerobacterium chartisolvens;superkingdom__bacteria;	90.5941	1.03323e-155	554.921	1	36	0	0	0.000522403	0.0214666	0	0	0.00732968
Zotu2935	anaerobacterium chartisolvens ;k__bacteria;p__firmicutes;c__clostridia;o__eubacteriales;f__oscillospiraceae;g__anaerobacterium;s__anaerobacterium chartisolvens;superkingdom__bacteria;	95.0617	1.34639e-179	634.269	11	26	0	0	0.00574644	0.0155037	0	0	0.00708338
Zotu2302	anaerobacterium chartisolvens ;k__bacteria;p__firmicutes;c__clostridia;o__eubacteriales;f__oscillospiraceae;g__anaerobacterium;s__anaerobacterium chartisolvens;superkingdom__bacteria;	94.5545	1.64024e-178	630.662	4	30	0	0	0.00208961	0.0178889	0	0	0.0066595
Zotu1984	anaerobacterium chartisolvens ;k__bacteria;p__firmicutes;c__clostridia;o__eubacteriales;f__oscillospiraceae;g__anaerobacterium;s__anaerobacterium chartisolvens;superkingdom__bacteria;	94.802	1.63583e-178	631.564	7	1	41	0	0.00365682	0.000596296	0.0156149	0	0.00662269
Zotu3151	anaerobacterium chartisolvens ;k__bacteria;p__firmicutes;c__clostridia;o__eubacteriales;f__oscillospiraceae;g__anaerobacterium;s__anaerobacterium chartisolvens;superkingdom__bacteria;	94.8148	4.712e-179	633.367	6	27	0	0	0.00313442	0.0161	0	0	0.00641147
Zotu2950	anaerobacterium chartisolvens ;k__bacteria;p__firmicutes;c__clostridia;o__eubacteriales;f__oscillospiraceae;g__anaerobacterium;s__anaerobacterium chartisolvens;superkingdom__bacteria;	97.2772	0	675.746	1	31	0	0	0.000522403	0.0184852	0	0	0.00633586
Zotu2564	anaerobacterium chartisolvens ;k__bacteria;p__firmicutes;c__clostridia;o__eubacteriales;f__oscillospiraceae;g__anaerobacterium;s__anaerobacterium chartisolvens;superkingdom__bacteria;	95.0495	0	639.679	6	23	0	0	0.00313442	0.0137148	0	0	0.00561641
Zotu2795	anaerobacterium chartisolvens ;k__bacteria;p__firmicutes;c__clostridia;o__eubacteriales;f__oscillospiraceae;g__anaerobacterium;s__anaerobacterium chartisolvens;superkingdom__bacteria;	90.5941	1.03045e-155	555.822	1	29	0	1	0.000522403	0.0172926	0	0.00044482	0.00549351
Zotu2100	anaerobacterium chartisolvens ;k__bacteria;p__firmicutes;c__clostridia;o__eubacteriales;f__oscillospiraceae;g__anaerobacterium;s__anaerobacterium chartisolvens;superkingdom__bacteria;	89.1089	1.1821e-148	531.477	8	19	0	0	0.00417923	0.0113296	0	0	0.00516962
Zotu2673	anaerobacterium chartisolvens ;k__bacteria;p__firmicutes;c__clostridia;o__eubacteriales;f__oscillospiraceae;g__anaerobacterium;s__anaerobacterium chartisolvens;superkingdom__bacteria;	94.3069	8.47382e-176	622.547	8	15	0	0	0.00417923	0.00894444	0	0	0.00437455
Zotu2979	anaerobacterium chartisolvens ;k__bacteria;p__firmicutes;c__clostridia;o__eubacteriales;f__oscillospiraceae;g__anaerobacterium;s__anaerobacterium chartisolvens;superkingdom__bacteria;	95.5446	0	645.089	9	13	1	0	0.00470163	0.00775185	0.000380852	0	0.00427811
Zotu2514	anaerobacterium chartisolvens ;k__bacteria;p__firmicutes;c__clostridia;o__eubacteriales;f__oscillospiraceae;g__anaerobacterium;s__anaerobacterium chartisolvens;superkingdom__bacteria;	94.5545	1.64024e-178	630.662	0	20	1	0	0	0.0119259	0.000380852	0	0.00410226
Zotu2951	anaerobacterium chartisolvens ;k__bacteria;p__firmicutes;c__clostridia;o__eubacteriales;f__oscillospiraceae;g__anaerobacterium;s__anaerobacterium chartisolvens;superkingdom__bacteria;	96.0494	0	655.909	6	15	0	0	0.00313442	0.00894444	0	0	0.00402629
Zotu2784	anaerobacterium chartisolvens ;k__bacteria;p__firmicutes;c__clostridia;o__eubacteriales;f__oscillospiraceae;g__anaerobacterium;s__anaerobacterium chartisolvens;superkingdom__bacteria;	97.0297	0	675.746	13	7	0	0	0.00679124	0.00417407	0	0	0.0036551
Zotu2837	anaerobacterium chartisolvens ;k__bacteria;p__firmicutes;c__clostridia;o__eubacteriales;f__oscillospiraceae;g__anaerobacterium;s__anaerobacterium chartisolvens;superkingdom__bacteria;	94.8148	4.712e-179	632.465	0	18	0	0	0	0.0107333	0	0	0.00357777
Zotu2605	anaerobacterium chartisolvens ;k__bacteria;p__firmicutes;c__clostridia;o__eubacteriales;f__oscillospiraceae;g__anaerobacterium;s__anaerobacterium chartisolvens;superkingdom__bacteria;	97.5248	0	681.156	2	16	0	0	0.00104481	0.00954073	0	0	0.00352851
Zotu2693	anaerobacterium chartisolvens ;k__bacteria;p__firmicutes;c__clostridia;o__eubacteriales;f__oscillospiraceae;g__anaerobacterium;s__anaerobacterium chartisolvens;superkingdom__bacteria;	96.0396	0	655.007	0	15	0	0	0	0.00894444	0	0	0.00298148
Zotu3162	anaerobacterium chartisolvens ;k__bacteria;p__firmicutes;c__clostridia;o__eubacteriales;f__oscillospiraceae;g__anaerobacterium;s__anaerobacterium chartisolvens;superkingdom__bacteria;	94.3069	8.47382e-176	622.547	0	10	0	0	0	0.00596296	0	0	0.00198765
Zotu393	anaeromyxobacter dehalogenans ;k__bacteria;p__proteobacteria;c__deltaproteobacteria;o__myxococcales;f__anaeromyxobacteraceae;g__anaeromyxobacter;s__anaeromyxobacter dehalogenans;superkingdom__bacteria;subphylum__delta/epsilon subdivisions;suborder__cystobacterineae	95.3271	0	682.96	69	33	222	0	0.0360458	0.0196778	0.0845492	0	0.0467576
Zotu1002	anaeromyxobacter dehalogenans ;k__bacteria;p__proteobacteria;c__deltaproteobacteria;o__myxococcales;f__anaeromyxobacteraceae;g__anaeromyxobacter;s__anaeromyxobacter dehalogenans;superkingdom__bacteria;subphylum__delta/epsilon subdivisions;suborder__cystobacterineae	85.6148	2.58286e-138	497.213	12	82	1	1	0.00626884	0.0488963	0.000380852	0.00044482	0.0180705
Zotu1014	anaeromyxobacter dehalogenans ;k__bacteria;p__proteobacteria;c__deltaproteobacteria;o__myxococcales;f__anaeromyxobacteraceae;g__anaeromyxobacter;s__anaeromyxobacter dehalogenans;superkingdom__bacteria;subphylum__delta/epsilon subdivisions;suborder__cystobacterineae	88.4161	8.37172e-151	538.69	18	13	87	1	0.00940326	0.00775185	0.0331341	0.00044482	0.0163183
Zotu1329	anaeromyxobacter dehalogenans ;k__bacteria;p__proteobacteria;c__deltaproteobacteria;o__myxococcales;f__anaeromyxobacteraceae;g__anaeromyxobacter;s__anaeromyxobacter dehalogenans;superkingdom__bacteria;subphylum__delta/epsilon subdivisions;suborder__cystobacterineae	95.5607	0	687.468	33	1	47	0	0.0172393	0.000596296	0.0179001	0	0.0119119
Zotu1629	anaeromyxobacter dehalogenans ;k__bacteria;p__proteobacteria;c__deltaproteobacteria;o__myxococcales;f__anaeromyxobacteraceae;g__anaeromyxobacter;s__anaeromyxobacter dehalogenans;superkingdom__bacteria;subphylum__delta/epsilon subdivisions;suborder__cystobacterineae	88.3886	2.3924e-151	540.494	51	8	0	0	0.0266426	0.00477037	0	0	0.010471
Zotu1759	anaeromyxobacter dehalogenans ;k__bacteria;p__proteobacteria;c__deltaproteobacteria;o__myxococcales;f__anaeromyxobacteraceae;g__anaeromyxobacter;s__anaeromyxobacter dehalogenans;superkingdom__bacteria;subphylum__delta/epsilon subdivisions;suborder__cystobacterineae	83.2168	5.01583e-122	443.112	4	0	71	0	0.00208961	0	0.0270405	0	0.00971004
Zotu1945	anaeromyxobacter dehalogenans ;k__bacteria;p__proteobacteria;c__deltaproteobacteria;o__myxococcales;f__anaeromyxobacteraceae;g__anaeromyxobacter;s__anaeromyxobacter dehalogenans;superkingdom__bacteria;subphylum__delta/epsilon subdivisions;suborder__cystobacterineae	87.239	6.51847e-146	522.46	7	0	49	0	0.00365682	0	0.0186618	0	0.00743953
Zotu2700	anaeromyxobacter dehalogenans ;k__bacteria;p__proteobacteria;c__deltaproteobacteria;o__myxococcales;f__anaeromyxobacteraceae;g__anaeromyxobacter;s__anaeromyxobacter dehalogenans;superkingdom__bacteria;subphylum__delta/epsilon subdivisions;suborder__cystobacterineae	82.9837	2.13278e-120	438.603	5	17	0	0	0.00261202	0.010137	0	0	0.00424968
Zotu2603	anaeromyxobacter dehalogenans ;k__bacteria;p__proteobacteria;c__deltaproteobacteria;o__myxococcales;f__anaeromyxobacteraceae;g__anaeromyxobacter;s__anaeromyxobacter dehalogenans;superkingdom__bacteria;subphylum__delta/epsilon subdivisions;suborder__cystobacterineae	85.8469	2.12014e-139	501.721	24	0	0	0	0.0125377	0	0	0	0.00417923
Zotu2956	anaeromyxobacter dehalogenans ;k__bacteria;p__proteobacteria;c__deltaproteobacteria;o__myxococcales;f__anaeromyxobacteraceae;g__anaeromyxobacter;s__anaeromyxobacter dehalogenans;superkingdom__bacteria;subphylum__delta/epsilon subdivisions;suborder__cystobacterineae	87.471	5.3642e-147	526.067	1	15	0	0	0.000522403	0.00894444	0	0	0.00315561
Zotu2884	anaeromyxobacter dehalogenans ;k__bacteria;p__proteobacteria;c__deltaproteobacteria;o__myxococcales;f__anaeromyxobacteraceae;g__anaeromyxobacter;s__anaeromyxobacter dehalogenans;superkingdom__bacteria;subphylum__delta/epsilon subdivisions;suborder__cystobacterineae	87.3832	1.80155e-146	524.263	16	0	0	0	0.00835845	0	0	0	0.00278615
Zotu2232	anaerosporobacter mobilis ;k__bacteria;p__firmicutes;c__clostridia;o__eubacteriales;f__lachnospiraceae;g__anaerosporobacter;s__anaerosporobacter mobilis;superkingdom__bacteria;	97.5124	0	681.156	1	28	0	0	0.000522403	0.0166963	0	0	0.00573956
Zotu2639	anaerosporobacter mobilis ;k__bacteria;p__firmicutes;c__clostridia;o__eubacteriales;f__lachnospiraceae;g__anaerosporobacter;s__anaerosporobacter mobilis;superkingdom__bacteria;	97.2637	0	676.648	3	15	0	0	0.00156721	0.00894444	0	0	0.00350388
Zotu2990	angustibacter peucedani ;k__bacteria;p__actinobacteria;c__actinomycetia;o__kineosporiales;f__kineosporiaceae;g__angustibacter;s__angustibacter peucedani;superkingdom__bacteria;	85.8911	1.44524e-128	465.654	21	1	0	0	0.0109705	0.000596296	0	0	0.00385559
Zotu2880	aphanizomenon flos_aquae ;k__bacteria;p__cyanobacteria;c__cyanobacteria;o__nostocales;f__aphanizomenonaceae;g__aphanizomenon;s__aphanizomenon flos_aquae; superkingdom__bacteria;	100	0	731.651	13	0	0	0	0.00679124	0	0	0	0.00226375
Zotu1885	aphanothece minutissima 2lt34s03 ;k__bacteria;p__cyanobacteria;c__cyanobacteria;o__chroococcales;f__aphanothecaceae;g__aphanothece;s__aphanothece minutissima; subclass oscillatoriophycideae;superkingdom__bacteria;	98.7624	0	707.305	21	6	23	0	0.0109705	0.00357777	0.0087596	0	0.00776928
Zotu6	aquabacterium limnoticum ;k__bacteria;p__proteobacteria;c__betaproteobacteria;o__burkholderiales;f__burkholderiales;g__aquabacterium;s__aquabacterium limnoticum;superkingdom__bacteria	90.8665	1.25408e-167	595.496	6018	1357	3143	363	3.14382	0.809173	1.19702	0.16147	1.5552
Zotu1197	aquabacterium limnoticum ;k__bacteria;p__proteobacteria;c__betaproteobacteria;o__burkholderiales;f__burkholderiales;g__aquabacterium;s__aquabacterium limnoticum;superkingdom__bacteria	97.8923	0	730.749	63	29	0	0	0.0329114	0.0172926	0	0	0.0167347
Zotu1331	aquisphaera giovannonii ;k__bacteria;p__planctomycetes;c__planctomycetia;o__isosphaerales;f__isosphaeraceae;g__aquisphaera;s__aquisphaera giovannonii; superkingdom__bacteria;	95.3659	0	655.007	29	20	0	0	0.0151497	0.0119259	0	0	0.0090252
Zotu1555	aquisphaera giovannonii ;k__bacteria;p__planctomycetes;c__planctomycetia;o__isosphaerales;f__isosphaeraceae;g__aquisphaera;s__aquisphaera giovannonii; superkingdom__bacteria;	97.561	0	695.583	48	3	0	0	0.0250754	0.00178889	0	0	0.00895475
Zotu1496	aquisphaera giovannonii ;k__bacteria;p__planctomycetes;c__planctomycetia;o__isosphaerales;f__isosphaeraceae;g__aquisphaera;s__aquisphaera giovannonii; superkingdom__bacteria;	95.122	0	650.499	42	3	8	0	0.0219409	0.00178889	0.00304682	0	0.00892555
Zotu1498	aquisphaera giovannonii ;k__bacteria;p__planctomycetes;c__planctomycetia;o__isosphaerales;f__isosphaeraceae;g__aquisphaera;s__aquisphaera giovannonii; superkingdom__bacteria;	96.5854	0	677.55	17	29	0	0	0.00888086	0.0172926	0	0	0.00872448
Zotu1678	aquisphaera giovannonii ;k__bacteria;p__planctomycetes;c__planctomycetia;o__isosphaerales;f__isosphaeraceae;g__aquisphaera;s__aquisphaera giovannonii; superkingdom__bacteria;	78.2716	3.16332e-86	324.089	44	0	0	1	0.0229857	0	0	0.00044482	0.00721709
Zotu2301	aquisphaera giovannonii ;k__bacteria;p__planctomycetes;c__planctomycetia;o__isosphaerales;f__isosphaeraceae;g__aquisphaera;s__aquisphaera giovannonii; superkingdom__bacteria;	96.0976	0	672.139	40	0	0	0	0.0208961	0	0	0	0.00696538
Zotu1572	aquisphaera giovannonii ;k__bacteria;p__planctomycetes;c__planctomycetia;o__isosphaerales;f__isosphaeraceae;g__aquisphaera;s__aquisphaera giovannonii; superkingdom__bacteria;	79.2683	1.34872e-84	318.679	36	0	0	0	0.0188065	0	0	0	0.00626884
Zotu2699	aquisphaera giovannonii ;k__bacteria;p__planctomycetes;c__planctomycetia;o__isosphaerales;f__isosphaeraceae;g__aquisphaera;s__aquisphaera giovannonii; superkingdom__bacteria;	95.8537	0	664.024	18	7	0	0	0.00940326	0.00417407	0	0	0.00452578
Zotu1788	aquisphaera giovannonii ;k__bacteria;p__planctomycetes;c__planctomycetia;o__isosphaerales;f__isosphaeraceae;g__aquisphaera;s__aquisphaera giovannonii; superkingdom__bacteria;	78.8698	2.60363e-87	327.696	25	0	0	0	0.0130601	0	0	0	0.00435336
Zotu2461	aquisphaera giovannonii ;k__bacteria;p__planctomycetes;c__planctomycetia;o__isosphaerales;f__isosphaeraceae;g__aquisphaera;s__aquisphaera giovannonii; superkingdom__bacteria;	95.8537	0	663.123	23	0	1	0	0.0120153	0	0.000380852	0	0.00413204
Zotu1918	arcobacter venerupis ;k__bacteria;p__proteobacteria;c__epsilonproteobacteria;o__campylobacterales;f__arcobacteraceae;g__arcobacter;s__arcobacter venerupis; subphylum__delta/epsilon subdivisions;superkingdom__bacteria;	77.4436	2.97875e-80	305.154	0	0	0	69	0	0	0	0.0306926	-0.0306926
Zotu425	arcobacter venerupis ;k__bacteria;p__proteobacteria;c__epsilonproteobacteria;o__campylobacterales;f__arcobacteraceae;g__arcobacter;s__arcobacter venerupis; subphylum__delta/epsilon subdivisions;superkingdom__bacteria;	77.6942	7.00535e-82	309.662	3	38	0	276	0.00156721	0.0226592	0	0.12277	-0.114695
Zotu1830	ardenticatena maritima ;k__bacteria;p__chloroflexi;c__ardenticatenia;o__ardenticatenales;f__ardenticatenaceae;g__ardenticatena;s__ardenticatena maritima;superkingdom__bacteria	82.3678	4.12211e-110	403.438	37	4	0	0	0.0193289	0.00238518	0	0	0.00723803
Zotu59	aromatoleum aromaticum ebn1 ;k__bacteria;p__proteobacteria;c__betaproteobacteria;o__rhodocyclales;f__rhodocyclaceae;g__aromatoleum;s__aromatoleum aromaticum;superkingdom__bacteria	95.3162	0	681.156	729	235	795	210	0.380832	0.14013	0.302778	0.0934122	0.181167
Zotu587	aureibacter tunicatorum ;k__bacteria;p__bacteroidetes;c__cytophagia;o__cytophagales;f__persicobacteraceae;g__aureibacter;s__aureibacter tunicatorum; superkingdom__bacteria;	86.2884	1.32437e-135	488.196	60	28	124	1	0.0313442	0.0166963	0.0472257	0.00044482	0.0313106
Zotu723	aureibacter tunicatorum ;k__bacteria;p__bacteroidetes;c__cytophagia;o__cytophagales;f__persicobacteraceae;g__aureibacter;s__aureibacter tunicatorum; superkingdom__bacteria;	86.7925	8.92353e-138	496.311	43	59	85	0	0.0224633	0.0351815	0.0323724	0	0.0300057
Zotu972	aureivirga marina ;k__bacteria;p__bacteroidetes;c__flavobacteriia;o__flavobacteriales;f__flavobacteriaceae;g__aureivirga;s__aureivirga marina;superkingdom__bacteria;superphylum__bacteroidetes/chlorobi group	93.128	1.71961e-178	630.662	56	46	0	0	0.0292546	0.0274296	0	0	0.0188947
Zotu131	ay032610.1 dechloromonas aromatica str. rcb ;k__bacteria;p__proteobacteria;c__betaproteobacteria;o__rhodocyclales;f__azonexaceae;g__dechloromonas;s__dechloromonas aromatica; superkingdom__bacteria;	90.3981	6.49627e-165	585.578	598	185	255	5	0.312397	0.110315	0.0971173	0.0022241	0.171052
Zotu700	ay123800.1 nitrosospira briensis str. nsp10 ;k__bacteria;p__proteobacteria;c__betaproteobacteria;o__nitrosomonadales;f__nitrosomonadaceae;g__nitrosospira;s__nitrosospira briensis;superkingdom__bacteria	94.1452	0	657.713	88	104	12	2	0.0459715	0.0620148	0.00457023	0.00088964	0.0366292
Zotu236	ay123800.1 nitrosospira briensis str. nsp10 ;k__bacteria;p__proteobacteria;c__betaproteobacteria;o__nitrosomonadales;f__nitrosomonadaceae;g__nitrosospira;s__nitrosospira briensis;superkingdom__bacteria	96.9626	0	707.305	8	3	6	693	0.00417923	0.00178889	0.00228511	0.30826	-0.305509
Zotu2096	ay123803.1 nitrosovibrio tenuis str. nv1 ;k__bacteria;p__proteobacteria;c__betaproteobacteria;o__nitrosomonadales;f__nitrosomonadaceae;g__nitrosovibrio;s__nitrosovibrio tenuis;superkingdom__bacteria	93.4426	0	645.089	29	12	0	0	0.0151497	0.00715555	0	0	0.00743508
Zotu234	ay187622.1 clostridium tunisiense str. dsm 15206 ;k__bacteria;p__firmicutes;c__clostridia;o__eubacteriales;f__clostridiaceae;g__clostridium;s__clostridium tunisiense;superkingdom__bacteria;	96.7662	0	667.631	137	344	36	3	0.0715692	0.205126	0.0137107	0.00133446	0.0954674
Zotu312	ay187622.1 clostridium tunisiense str. dsm 15206 ;k__bacteria;p__firmicutes;c__clostridia;o__eubacteriales;f__clostridiaceae;g__clostridium;s__clostridium tunisiense;superkingdom__bacteria;	99.5025	0	717.224	46	348	3	2	0.0240306	0.207511	0.00114256	0.00088964	0.0766717
Zotu354	ay187622.1 clostridium tunisiense str. dsm 15206 ;k__bacteria;p__firmicutes;c__clostridia;o__eubacteriales;f__clostridiaceae;g__clostridium;s__clostridium tunisiense;superkingdom__bacteria;	100	0	726.241	44	346	3	1	0.0229857	0.206318	0.00114256	0.00044482	0.0763707
Zotu496	ay187622.1 clostridium tunisiense str. dsm 15206 ;k__bacteria;p__firmicutes;c__clostridia;o__eubacteriales;f__clostridiaceae;g__clostridium;s__clostridium tunisiense;superkingdom__bacteria;	96.2687	0	657.713	73	167	0	2	0.0381354	0.0995814	0	0.00088964	0.045016
Zotu1215	ay187622.1 clostridium tunisiense str. dsm 15206 ;k__bacteria;p__firmicutes;c__clostridia;o__eubacteriales;f__clostridiaceae;g__clostridium;s__clostridium tunisiense;superkingdom__bacteria;	97.7612	0	685.665	10	82	2	0	0.00522403	0.0488963	0.000761705	0	0.018294
Zotu1295	ay187622.1 clostridium tunisiense str. dsm 15206 ;k__bacteria;p__firmicutes;c__clostridia;o__eubacteriales;f__clostridiaceae;g__clostridium;s__clostridium tunisiense;superkingdom__bacteria;	96.5174	0	663.123	19	75	0	0	0.00992566	0.0447222	0	0	0.0182159
Zotu1208	ay187622.1 clostridium tunisiense str. dsm 15206 ;k__bacteria;p__firmicutes;c__clostridia;o__eubacteriales;f__clostridiaceae;g__clostridium;s__clostridium tunisiense;superkingdom__bacteria;	95.0249	3.83674e-180	636.072	25	61	1	0	0.0130601	0.036374	0.000380852	0	0.016605
Zotu2279	ay187622.1 clostridium tunisiense str. dsm 15206 ;k__bacteria;p__firmicutes;c__clostridia;o__eubacteriales;f__clostridiaceae;g__clostridium;s__clostridium tunisiense;superkingdom__bacteria;	98.01	0	690.173	14	25	0	1	0.00731365	0.0149074	0	0.00044482	0.00696219
Zotu2438	ay187622.1 clostridium tunisiense str. dsm 15206 ;k__bacteria;p__firmicutes;c__clostridia;o__eubacteriales;f__clostridiaceae;g__clostridium;s__clostridium tunisiense;superkingdom__bacteria;	97.2637	0	675.746	12	12	0	0	0.00626884	0.00715555	0	0	0.0044748
Zotu2582	ay187622.1 clostridium tunisiense str. dsm 15206 ;k__bacteria;p__firmicutes;c__clostridia;o__eubacteriales;f__clostridiaceae;g__clostridium;s__clostridium tunisiense;superkingdom__bacteria;	95.5224	0	645.089	0	21	0	0	0	0.0125222	0	0	0.00417407
Zotu3158	ay187622.1 clostridium tunisiense str. dsm 15206 ;k__bacteria;p__firmicutes;c__clostridia;o__eubacteriales;f__clostridiaceae;g__clostridium;s__clostridium tunisiense;superkingdom__bacteria;	95.2736	0	640.581	0	13	0	0	0	0.00775185	0	0	0.00258395
Zotu2423	ay196006.1 brevibacillus thermoruber str. wr_249 ;k__bacteria;p__firmicutes;c__bacilli;o__bacillales;f__paenibacillaceae;g__brevibacillus;s__brevibacillus thermoruber;superkingdom__bacteria	100	0	771.325	4	35	0	0	0.00208961	0.0208704	0	0	0.00765332
Zotu3014	ay196088.1 aphanizomenon issatschenkoi str. lemcya31 ;k__bacteria;p__cyanobacteria;c__cyanobacteria;o__nostocales;f__aphanizomenonaceae;g__cuspidothrix;s__aphanizomenon issatschenkoi; superkingdom__bacteria;	100	0	731.651	10	11	0	1	0.00522403	0.00655925	0	0.00044482	0.00348294
Zotu2593	ay212725.1 water 5 m downstream manure clone 31ds5 ;k__bacteria;p__firmicutes;c__bacilli;o__bacillales;f__planococcaceae;g__solibacillus;s__solibacillus silvestris;superkingdom__bacteria	99.0632	0	753.291	9	22	0	0	0.00470163	0.0131185	0	0	0.00594005
Zotu1981	ay214183.1 benzene_contaminated groundwater clone zz12c8 ;k__bacteria;p__firmicutes;c__clostridia;o__eubacteriales;f__desulfitobacteriaceae;g__desulfosporosinus;s__desulfosporosinus meridiei; superkingdom__bacteria;	99.2991	0	759.603	7	45	0	0	0.00365682	0.0268333	0	0	0.0101634
Zotu863	ay244773.1 clostridium glycolicum str. 2002_87768 ;k__bacteria;p__firmicutes;c__clostridia;o__eubacteriales;f__clostridiaceae;g__clostridium;s__clostridium metallolevans;superkingdom__bacteria;	99.5012	0	715.42	22	99	0	1	0.0114929	0.0590333	0	0.00044482	0.0230639
Zotu2563	ay244773.1 clostridium glycolicum str. 2002_87768 ;k__bacteria;p__firmicutes;c__clostridia;o__eubacteriales;f__clostridiaceae;g__clostridium;s__clostridium metallolevans;superkingdom__bacteria;	99.7506	0	719.929	13	8	1	0	0.00679124	0.00477037	0.000380852	0	0.00398082
Zotu390	ay281086.1 streptococcus sanguinis str. atcc 49296 ;k__bacteria;p__firmicutes;c__bacilli;o__lactobacillales;f__streptococcaceae;g__streptococcus;s__streptococcus sanguinis;superkingdom__bacteria	100	0	771.325	1	0	1	439	0.000522403	0	0.000380852	0.195276	-0.194975
Zotu2345	ay281145.1 collimonas fungivorans str. cto 300 ;k__bacteria;p__proteobacteria;c__betaproteobacteria;o__burkholderiales;f__oxalobacteraceae;g__collimonas;s__collimonas fungivorans;superkingdom__bacteria	92.5059	2.12177e-177	627.055	33	1	0	0	0.0172393	0.000596296	0	0	0.0059452
Zotu2054	ay292865.1 klebsiella pneumoniae 521 ;k__bacteria;p__proteobacteria;c__gammaproteobacteria;o__enterobacterales;f__enterobacteriaceae;g__klebsiella;s__klebsiella pneumoniae; superkingdom__bacteria;	99.5316	0	762.308	0	1	36	0	0	0.000596296	0.0137107	0	0.00476899
Zotu2541	ay340820.1 sulfate_reducing fluidized_bed reactor clone sr_fbr_e5 ;k__bacteria;p__proteobacteria;c__deltaproteobacteria;o__desulfovibrionales;f__desulfovibrionaceae;g__desulfovibrio;s__desulfovibrio sulfodismutans;superkingdom__bacteria;subphylum__delta/epsilon subdivisions	86.014	2.59597e-138	497.213	12	17	0	1	0.00626884	0.010137	0	0.00044482	0.0050238
Zotu3100	ay340820.1 sulfate_reducing fluidized_bed reactor clone sr_fbr_e5 ;k__bacteria;p__proteobacteria;c__deltaproteobacteria;o__desulfovibrionales;f__desulfovibrionaceae;g__desulfovibrio;s__desulfovibrio sulfodismutans;superkingdom__bacteria;subphylum__delta/epsilon subdivisions	85.2804	1.34474e-135	488.196	18	0	0	0	0.00940326	0	0	0	0.00313442
Zotu3060	ay359637.1 paenibacillus polymyxa str. kctc3717 ;k__bacteria;p__firmicutes;c__bacilli;o__bacillales;f__paenibacillaceae;g__paenibacillus;s__paenibacillus chitinolyticus;superkingdom__bacteria	95.0704	0	673.943	1	14	0	0	0.000522403	0.00834814	0	0	0.00295685
Zotu1403	ay359867.1 desulfovibrio longus str. dsm 6739 ;k__bacteria;p__proteobacteria;c__deltaproteobacteria;o__desulfovibrionales;f__desulfovibrionaceae;g__desulfovibrio;s__desulfovibrio longus;superkingdom__bacteria;subphylum__delta/epsilon subdivisions	82.6923	6.98971e-114	416.061	0	0	75	1	0	0	0.0285639	0.00044482	0.00907649
Zotu194	ay360060.1 thialkalivibrio thiocyanodenitrificans str. arhd ;k__bacteria;p__proteobacteria;c__gammaproteobacteria;o__chromatiales;f__ectothiorhodospiraceae;g__thioalkalivibrio;s__thioalkalivibrio thiocyanodenitrificans;superkingdom__bacteria	92.0375	1.0991e-174	618.038	298	56	385	7	0.155676	0.0333926	0.146628	0.00311374	0.108785
Zotu291	ay360060.1 thialkalivibrio thiocyanodenitrificans str. arhd ;k__bacteria;p__proteobacteria;c__gammaproteobacteria;o__chromatiales;f__ectothiorhodospiraceae;g__thioalkalivibrio;s__thioalkalivibrio thiocyanodenitrificans;superkingdom__bacteria	92.9742	4.09598e-180	636.072	199	69	259	4	0.103958	0.0411444	0.0986407	0.00177928	0.0794685
Zotu1419	ay360060.1 thialkalivibrio thiocyanodenitrificans str. arhd ;k__bacteria;p__proteobacteria;c__gammaproteobacteria;o__chromatiales;f__ectothiorhodospiraceae;g__thioalkalivibrio;s__thioalkalivibrio thiocyanodenitrificans;superkingdom__bacteria	91.1007	2.9493e-169	600.005	47	31	1	0	0.024553	0.0184852	0.000380852	0	0.014473
Zotu1540	ay360060.1 thialkalivibrio thiocyanodenitrificans str. arhd ;k__bacteria;p__proteobacteria;c__gammaproteobacteria;o__chromatiales;f__ectothiorhodospiraceae;g__thioalkalivibrio;s__thioalkalivibrio thiocyanodenitrificans;superkingdom__bacteria	92.74	1.74165e-178	630.662	52	0	0	0	0.027165	0	0	0	0.00905499
Zotu2665	ay429720.1 tce and cis_dce contaminated groundwater isolate str. htcc304 ;k__bacteria;p__proteobacteria;c__betaproteobacteria;o__burkholderiales;f__burkholderiales;g__methylibium;s__methylibium petroleiphilum;superkingdom__bacteria	96.7213	0	708.207	35	11	0	0	0.0182841	0.00655925	0	0	0.00828112
Zotu1368	ay442816.1 clostridium sporogenes ye52 ;k__bacteria;p__firmicutes;c__clostridia;o__eubacteriales;f__clostridiaceae;g__clostridium;s__clostridium sporogenes;superkingdom__bacteria;	95.7711	0	649.597	8	50	0	0	0.00417923	0.0298148	0	0	0.0113313
Zotu1748	ay442816.1 clostridium sporogenes ye52 ;k__bacteria;p__firmicutes;c__clostridia;o__eubacteriales;f__clostridiaceae;g__clostridium;s__clostridium sporogenes;superkingdom__bacteria;	99.7512	0	721.732	7	42	0	0	0.00365682	0.0250444	0	0	0.00956708
Zotu2363	ay442816.1 clostridium sporogenes ye52 ;k__bacteria;p__firmicutes;c__clostridia;o__eubacteriales;f__clostridiaceae;g__clostridium;s__clostridium sporogenes;superkingdom__bacteria;	99.2537	0	712.715	14	34	0	0	0.00731365	0.0202741	0	0	0.0091959
Zotu1961	ay464939.1 desulfocaldus terraneus str. p6.2 ;k__bacteria;p__proteobacteria;c__deltaproteobacteria;o__desulfovibrionales;f__desulfomicrobiaceae;g__desulfomicrobium;s__desulfomicrobium terraneus;superkingdom__bacteria;subphylum__delta/epsilon subdivisions	83.8095	1.75512e-121	441.308	20	12	0	0	0.0104481	0.00715555	0	0	0.00586787
Zotu930	ay493562.1 desulfatibacillum alkenivorans str. pf2803 ;k__bacteria;p__proteobacteria;c__deltaproteobacteria;o__desulfobacterales;f__desulfobacteraceae;g__desulfatibacillum;s__desulfatibacillum alkenivorans;superkingdom__bacteria;subphylum__delta/epsilon subdivisions	94.8718	0	668.533	29	13	85	0	0.0151497	0.00775185	0.0323724	0	0.0184247
Zotu1315	ay493562.1 desulfatibacillum alkenivorans str. pf2803 ;k__bacteria;p__proteobacteria;c__deltaproteobacteria;o__desulfobacterales;f__desulfobacteraceae;g__desulfatibacillum;s__desulfatibacillum alkenivorans;superkingdom__bacteria;subphylum__delta/epsilon subdivisions	94.6387	0	664.024	11	0	62	1	0.00574644	0	0.0236128	0.00044482	0.00934161
Zotu2121	ay493562.1 desulfatibacillum alkenivorans str. pf2803 ;k__bacteria;p__proteobacteria;c__deltaproteobacteria;o__desulfobacterales;f__desulfobacteraceae;g__desulfatibacillum;s__desulfatibacillum alkenivorans;superkingdom__bacteria;subphylum__delta/epsilon subdivisions	80.7059	1.87088e-108	398.027	5	0	40	0	0.00261202	0	0.0152341	0	0.0059487
Zotu1582	ay530294.1 paenibacillus subsp. larvae str. dsm 7030 ;k__bacteria;p__firmicutes;c__bacilli;o__bacillales;f__paenibacillaceae;g__paenibacillus;s__paenibacillus larvae;superkingdom__bacteria	92.9742	4.98992e-179	632.465	3	44	1	0	0.00156721	0.026237	0.000380852	0	0.00939503
Zotu1677	ay538708.1 schlegelella thermodepolymerans str. sa8 ;k__bacteria;p__proteobacteria;c__betaproteobacteria;o__burkholderiales;f__comamonadaceae;g__schlegelella;s__schlegelella thermodepolymerans;superkingdom__bacteria	96.7213	0	708.207	0	0	0	57	0	0	0	0.0253547	-0.0253547
Zotu762	ay538708.1 schlegelella thermodepolymerans str. sa8 ;k__bacteria;p__proteobacteria;c__betaproteobacteria;o__burkholderiales;f__comamonadaceae;g__schlegelella;s__schlegelella thermodepolymerans;superkingdom__bacteria	96.9555	0	712.715	8	0	1	211	0.00417923	0	0.000380852	0.093857	-0.092337
Zotu1621	ay548789.1 desulfobulbus propionicus str. dsm 2032 ;k__bacteria;p__proteobacteria;c__deltaproteobacteria;o__desulfobacterales;f__desulfobulbaceae;g__desulfobulbus;s__desulfobulbus propionicus;superkingdom__bacteria;subphylum__delta/epsilon subdivisions	81.3953	1.49693e-109	401.634	13	3	54	0	0.00679124	0.00178889	0.020566	0	0.00971538
Zotu1427	ay548789.1 desulfobulbus propionicus str. dsm 2032 ;k__bacteria;p__proteobacteria;c__deltaproteobacteria;o__desulfobacterales;f__desulfobulbaceae;g__desulfobulbus;s__desulfobulbus propionicus;superkingdom__bacteria;subphylum__delta/epsilon subdivisions	95.0935	0	678.451	0	48	0	0	0	0.0286222	0	0	0.00954073
Zotu2922	ay550276.1 bacillus cibus str. jg_30 ;k__bacteria;p__firmicutes;c__bacilli;o__bacillales;f__bacillaceae;g__bacillus;s__bacillus cibus;superkingdom__bacteria	100	0	771.325	3	29	0	0	0.00156721	0.0172926	0	0	0.0062866
Zotu1991	ay598818.1 paenibacillus phyllosphaerae str. palxil04 ;k__bacteria;p__firmicutes;c__bacilli;o__bacillales;f__paenibacillaceae;g__paenibacillus;s__paenibacillus phyllosphaerae;superkingdom__bacteria	97.1831	0	715.42	0	26	0	0	0	0.0155037	0	0	0.0051679
Zotu1518	ay605178.1 microbial mat clone ll026 ;k__bacteria;p__spirochaetes;c__spirochaetia;o__spirochaetales;f__spirochaetaceae;g__spirochaeta;s__spirochaeta thermophila;superkingdom__bacteria	88.0841	8.47877e-151	538.69	4	0	70	0	0.00208961	0	0.0266597	0	0.00958309
Zotu2266	ay623931.1 pseudomonas rhodesiae str. cp_17 ;k__bacteria;p__proteobacteria;c__gammaproteobacteria;o__pseudomonadales;f__pseudomonadaceae;g__pseudomonas;s__pseudomonas rhodesiae;superkingdom__bacteria;species group pseudomonas fluorescens group	100	0	771.325	0	22	0	1	0	0.0131185	0	0.00044482	0.00392802
Zotu89	ay651787.1 syntrophobacter sulfatereducens str. tb8106 ;k__bacteria;p__proteobacteria;c__deltaproteobacteria;o__syntrophobacterales;f__syntrophobacteraceae;g__syntrophobacter;s__syntrophobacter sulfatereducens;superkingdom__bacteria;subphylum__delta/epsilon subdivisions	87.4126	1.86757e-146	524.263	615	235	609	3	0.321278	0.14013	0.231939	0.00133446	0.229781
Zotu1254	ay662007.1 uranium_contaminated groundwater clone 300c_g04 ;k__bacteria;p__proteobacteria;c__betaproteobacteria;o__burkholderiales;f__oxalobacteraceae;g__janthinobacterium;s__janthinobacterium lividum;superkingdom__bacteria	100	0	771.325	1	1	77	2	0.000522403	0.000596296	0.0293256	0.00088964	0.00925847
Zotu2459	ay701556.1 anabaena smithii str. tac450 ;k__bacteria;p__cyanobacteria;c__cyanobacteria;o__nostocales;f__aphanizomenonaceae;g__dolichospermum;s__dolichospermum smithii; superkingdom__bacteria;	100	0	731.651	43	0	0	0	0.0224633	0	0	0	0.00748778
Zotu2539	ay724799.1 myxococcus xanthus str. ucdav16 ;k__bacteria;p__proteobacteria;c__deltaproteobacteria;o__myxococcales;f__myxococcaceae;g__corallococcus;s__corallococcus macrosporus;superkingdom__bacteria;subphylum__delta/epsilon subdivisions;suborder__cystobacterineae	86.9159	3.37665e-143	513.443	19	10	0	0	0.00992566	0.00596296	0	0	0.00529621
Zotu840	ay833099.1 bacillus simplex ph18 ;k__bacteria;p__firmicutes;c__bacilli;o__bacillales;f__bacillaceae;g__bacillus;s__bacillus simplex;superkingdom__bacteria	99.0632	0	753.291	48	123	4	0	0.0250754	0.0733444	0.00152341	0	0.0333144
Zotu1338	ay833099.1 bacillus simplex ph18 ;k__bacteria;p__firmicutes;c__bacilli;o__bacillales;f__bacillaceae;g__bacillus;s__bacillus simplex;superkingdom__bacteria	99.5316	0	762.308	7	56	0	0	0.00365682	0.0333926	0	0	0.0123498
Zotu1650	ay833099.1 bacillus simplex ph18 ;k__bacteria;p__firmicutes;c__bacilli;o__bacillales;f__bacillaceae;g__bacillus;s__bacillus simplex;superkingdom__bacteria	99.5316	0	762.308	11	48	0	0	0.00574644	0.0286222	0	0	0.0114562
Zotu2073	ay833099.1 bacillus simplex ph18 ;k__bacteria;p__firmicutes;c__bacilli;o__bacillales;f__bacillaceae;g__bacillus;s__bacillus simplex;superkingdom__bacteria	99.5316	0	762.308	9	38	0	1	0.00470163	0.0226592	0	0.00044482	0.00867547
Zotu1895	ay858804.1 clostridium lundensis str. dsm 17049 ;k__bacteria;p__firmicutes;c__clostridia;o__eubacteriales;f__clostridiaceae;g__clostridium;s__clostridium lundensis;superkingdom__bacteria;	99.5025	0	717.224	4	36	1	0	0.00208961	0.0214666	0.000380852	0	0.00797904
Zotu2046	ay858804.1 clostridium lundensis str. dsm 17049 ;k__bacteria;p__firmicutes;c__clostridia;o__eubacteriales;f__clostridiaceae;g__clostridium;s__clostridium lundensis;superkingdom__bacteria;	99.7512	0	721.732	17	23	0	0	0.00888086	0.0137148	0	0	0.00753189
Zotu2996	ay858804.1 clostridium lundensis str. dsm 17049 ;k__bacteria;p__firmicutes;c__clostridia;o__eubacteriales;f__clostridiaceae;g__clostridium;s__clostridium lundensis;superkingdom__bacteria;	100	0	726.241	5	20	0	0	0.00261202	0.0119259	0	0	0.00484598
Zotu2918	ay858804.1 clostridium lundensis str. dsm 17049 ;k__bacteria;p__firmicutes;c__clostridia;o__eubacteriales;f__clostridiaceae;g__clostridium;s__clostridium lundensis;superkingdom__bacteria;	94.2786	8.45098e-176	621.645	10	17	0	1	0.00522403	0.010137	0	0.00044482	0.00467553
Zotu3062	ay916332.1 human stool clone c289 ;k__bacteria;p__firmicutes;c__clostridia;o__eubacteriales;f__oscillospiraceae;g__pseudoflavonifractor;s__bacteroides capillosus;superkingdom__bacteria;	76.808	3.62886e-79	300.646	18	0	0	0	0.00940326	0	0	0	0.00313442
Zotu3200	ay916332.1 human stool clone c289 ;k__bacteria;p__firmicutes;c__clostridia;o__eubacteriales;f__oscillospiraceae;g__pseudoflavonifractor;s__bacteroides capillosus;superkingdom__bacteria;	77.0574	8.53426e-81	306.056	15	0	0	0	0.00783605	0	0	0	0.00261202
Zotu650	ay918122.1 desulfotomaculum salinum str. 435 ;k__bacteria;p__firmicutes;c__clostridia;o__eubacteriales;f__desulfotomaculaceae;g__desulfotomaculum;s__desulfotomaculum salinum; superkingdom__bacteria;	81.1138	1.80473e-108	398.027	55	28	97	0	0.0287322	0.0166963	0.0369427	0	0.027457
Zotu2321	ay947993.1 synchrony and seasonality two temperate rivers usa: massachusetts parker river clone prd18a08 ;k__bacteria;p__proteobacteria;c__alphaproteobacteria;o__caulobacterales;f__caulobacteraceae;g__asticcacaulis;s__asticcacaulis biprosthecium;superkingdom__bacteria	82.9208	6.54955e-114	416.061	14	13	0	2	0.00731365	0.00775185	0	0.00088964	0.00413219
Zotu1827	ay958924.1 microbes on human vaginal epithelium clone rrna151 ;k__bacteria;p__actinobacteria;c__coriobacteriia;o__coriobacteriales;f__atopobiaceae;g__atopobium;s__atopobium vaginae; superkingdom__bacteria;	87.7751	4.74564e-141	506.23	11	24	2	0	0.00574644	0.0143111	0.000761705	0	0.00693975
Zotu370	ay959944.2 clostridium alkalicellum str. z_7026 ;k__bacteria;p__firmicutes;c__clostridia;o__eubacteriales;f__oscillospiraceae;g__ruminiclostridium;s__clostridium alkalicellum;superkingdom__bacteria;	94.5679	5.74039e-178	628.859	61	264	2	2	0.0318666	0.157422	0.000761705	0.00088964	0.0624605
Zotu763	ay959944.2 clostridium alkalicellum str. z_7026 ;k__bacteria;p__firmicutes;c__clostridia;o__eubacteriales;f__oscillospiraceae;g__ruminiclostridium;s__clostridium alkalicellum;superkingdom__bacteria;	94.5679	5.74039e-178	628.859	29	137	0	0	0.0151497	0.0816925	0	0	0.0322807
Zotu784	ay959944.2 clostridium alkalicellum str. z_7026 ;k__bacteria;p__firmicutes;c__clostridia;o__eubacteriales;f__oscillospiraceae;g__ruminiclostridium;s__clostridium alkalicellum;superkingdom__bacteria;	94.5679	5.74039e-178	628.859	12	47	110	0	0.00626884	0.0280259	0.0418937	0	0.0253962
Zotu884	ay959944.2 clostridium alkalicellum str. z_7026 ;k__bacteria;p__firmicutes;c__clostridia;o__eubacteriales;f__oscillospiraceae;g__ruminiclostridium;s__clostridium alkalicellum;superkingdom__bacteria;	95.8025	0	650.499	13	108	2	2	0.00679124	0.0643999	0.000761705	0.00088964	0.0230947
Zotu753	ay959944.2 clostridium alkalicellum str. z_7026 ;k__bacteria;p__firmicutes;c__clostridia;o__eubacteriales;f__oscillospiraceae;g__ruminiclostridium;s__clostridium alkalicellum;superkingdom__bacteria;	95.3086	0	642.384	6	29	123	1	0.00313442	0.0172926	0.0468448	0.00044482	0.0219791
Zotu1484	ay959944.2 clostridium alkalicellum str. z_7026 ;k__bacteria;p__firmicutes;c__clostridia;o__eubacteriales;f__oscillospiraceae;g__ruminiclostridium;s__clostridium alkalicellum;superkingdom__bacteria;	94.5679	5.74039e-178	628.859	32	67	0	0	0.0167169	0.0399518	0	0	0.0188896
Zotu1424	ay959944.2 clostridium alkalicellum str. z_7026 ;k__bacteria;p__firmicutes;c__clostridia;o__eubacteriales;f__oscillospiraceae;g__ruminiclostridium;s__clostridium alkalicellum;superkingdom__bacteria;	94.802	1.34639e-179	635.17	22	67	0	0	0.0114929	0.0399518	0	0	0.0171482
Zotu1366	ay959944.2 clostridium alkalicellum str. z_7026 ;k__bacteria;p__firmicutes;c__clostridia;o__eubacteriales;f__oscillospiraceae;g__ruminiclostridium;s__clostridium alkalicellum;superkingdom__bacteria;	96.2963	0	660.418	4	63	0	0	0.00208961	0.0375666	0	0	0.0132187
Zotu1974	ay959944.2 clostridium alkalicellum str. z_7026 ;k__bacteria;p__firmicutes;c__clostridia;o__eubacteriales;f__oscillospiraceae;g__ruminiclostridium;s__clostridium alkalicellum;superkingdom__bacteria;	93.8424	5.37639e-172	609.923	4	51	2	0	0.00208961	0.0304111	0.000761705	0	0.0110875
Zotu1687	ay959944.2 clostridium alkalicellum str. z_7026 ;k__bacteria;p__firmicutes;c__clostridia;o__eubacteriales;f__oscillospiraceae;g__ruminiclostridium;s__clostridium alkalicellum;superkingdom__bacteria;	94.5679	5.74039e-178	628.859	5	49	1	0	0.00261202	0.0292185	0.000380852	0	0.0107371
Zotu1700	ay959944.2 clostridium alkalicellum str. z_7026 ;k__bacteria;p__firmicutes;c__clostridia;o__eubacteriales;f__oscillospiraceae;g__ruminiclostridium;s__clostridium alkalicellum;superkingdom__bacteria;	96.5432	0	664.926	5	45	1	0	0.00261202	0.0268333	0.000380852	0	0.00994206
Zotu2262	ay959944.2 clostridium alkalicellum str. z_7026 ;k__bacteria;p__firmicutes;c__clostridia;o__eubacteriales;f__oscillospiraceae;g__ruminiclostridium;s__clostridium alkalicellum;superkingdom__bacteria;	95.7921	0	652.302	3	45	0	0	0.00156721	0.0268333	0	0	0.00946684
Zotu2038	ay959944.2 clostridium alkalicellum str. z_7026 ;k__bacteria;p__firmicutes;c__clostridia;o__eubacteriales;f__oscillospiraceae;g__ruminiclostridium;s__clostridium alkalicellum;superkingdom__bacteria;	96.7822	0	671.238	20	27	0	0	0.0104481	0.0161	0	0	0.00884935
Zotu2381	ay959944.2 clostridium alkalicellum str. z_7026 ;k__bacteria;p__firmicutes;c__clostridia;o__eubacteriales;f__oscillospiraceae;g__ruminiclostridium;s__clostridium alkalicellum;superkingdom__bacteria;	96.0591	0	646.892	5	39	0	0	0.00261202	0.0232555	0	0	0.00862252
Zotu1640	ay959944.2 clostridium alkalicellum str. z_7026 ;k__bacteria;p__firmicutes;c__clostridia;o__eubacteriales;f__oscillospiraceae;g__ruminiclostridium;s__clostridium alkalicellum;superkingdom__bacteria;	95.297	0	643.286	9	35	0	0	0.00470163	0.0208704	0	0	0.00852399
Zotu1797	ay959944.2 clostridium alkalicellum str. z_7026 ;k__bacteria;p__firmicutes;c__clostridia;o__eubacteriales;f__oscillospiraceae;g__ruminiclostridium;s__clostridium alkalicellum;superkingdom__bacteria;	96.0494	0	655.909	6	38	0	1	0.00313442	0.0226592	0	0.00044482	0.00815307
Zotu2389	ay959944.2 clostridium alkalicellum str. z_7026 ;k__bacteria;p__firmicutes;c__clostridia;o__eubacteriales;f__oscillospiraceae;g__ruminiclostridium;s__clostridium alkalicellum;superkingdom__bacteria;	94.8148	4.712e-179	633.367	6	31	0	0	0.00313442	0.0184852	0	0	0.00720653
Zotu1979	ay959944.2 clostridium alkalicellum str. z_7026 ;k__bacteria;p__firmicutes;c__clostridia;o__eubacteriales;f__oscillospiraceae;g__ruminiclostridium;s__clostridium alkalicellum;superkingdom__bacteria;	96.0494	0	655.909	11	26	0	0	0.00574644	0.0155037	0	0	0.00708338
Zotu2865	ay959944.2 clostridium alkalicellum str. z_7026 ;k__bacteria;p__firmicutes;c__clostridia;o__eubacteriales;f__oscillospiraceae;g__ruminiclostridium;s__clostridium alkalicellum;superkingdom__bacteria;	95.0617	1.10816e-180	637.875	1	31	0	0	0.000522403	0.0184852	0	0	0.00633586
Zotu2250	ay959944.2 clostridium alkalicellum str. z_7026 ;k__bacteria;p__firmicutes;c__clostridia;o__eubacteriales;f__oscillospiraceae;g__ruminiclostridium;s__clostridium alkalicellum;superkingdom__bacteria;	92.8218	1.17788e-167	595.496	0	29	0	0	0	0.0172926	0	0	0.00576419
Zotu1913	ay959944.2 clostridium alkalicellum str. z_7026 ;k__bacteria;p__firmicutes;c__clostridia;o__eubacteriales;f__oscillospiraceae;g__ruminiclostridium;s__clostridium alkalicellum;superkingdom__bacteria;	94.8148	4.712e-179	633.367	20	10	2	0	0.0104481	0.00596296	0.000761705	0	0.00572424
Zotu2328	ay959944.2 clostridium alkalicellum str. z_7026 ;k__bacteria;p__firmicutes;c__clostridia;o__eubacteriales;f__oscillospiraceae;g__ruminiclostridium;s__clostridium alkalicellum;superkingdom__bacteria;	94.5545	1.64024e-178	630.662	0	28	0	0	0	0.0166963	0	0	0.00556543
Zotu2334	ay959944.2 clostridium alkalicellum str. z_7026 ;k__bacteria;p__firmicutes;c__clostridia;o__eubacteriales;f__oscillospiraceae;g__ruminiclostridium;s__clostridium alkalicellum;superkingdom__bacteria;	94.5679	5.74039e-178	628.859	4	24	0	0	0.00208961	0.0143111	0	0	0.0054669
Zotu2081	ay959944.2 clostridium alkalicellum str. z_7026 ;k__bacteria;p__firmicutes;c__clostridia;o__eubacteriales;f__oscillospiraceae;g__ruminiclostridium;s__clostridium alkalicellum;superkingdom__bacteria;	94.321	2.44088e-176	624.35	6	21	1	0	0.00313442	0.0125222	0.000380852	0	0.00534583
Zotu2463	ay959944.2 clostridium alkalicellum str. z_7026 ;k__bacteria;p__firmicutes;c__clostridia;o__eubacteriales;f__oscillospiraceae;g__ruminiclostridium;s__clostridium alkalicellum;superkingdom__bacteria;	93.5802	1.54036e-172	610.825	1	26	0	0	0.000522403	0.0155037	0	0	0.00534203
Zotu2525	ay959944.2 clostridium alkalicellum str. z_7026 ;k__bacteria;p__firmicutes;c__clostridia;o__eubacteriales;f__oscillospiraceae;g__ruminiclostridium;s__clostridium alkalicellum;superkingdom__bacteria;	94.8148	4.712e-179	633.367	5	21	0	0	0.00261202	0.0125222	0	0	0.00504474
Zotu3170	ay959944.2 clostridium alkalicellum str. z_7026 ;k__bacteria;p__firmicutes;c__clostridia;o__eubacteriales;f__oscillospiraceae;g__ruminiclostridium;s__clostridium alkalicellum;superkingdom__bacteria;	96.2963	0	660.418	6	20	0	0	0.00313442	0.0119259	0	0	0.00502011
Zotu2464	ay959944.2 clostridium alkalicellum str. z_7026 ;k__bacteria;p__firmicutes;c__clostridia;o__eubacteriales;f__oscillospiraceae;g__ruminiclostridium;s__clostridium alkalicellum;superkingdom__bacteria;	96.5347	0	666.729	0	24	0	0	0	0.0143111	0	0	0.00477037
Zotu2857	ay959944.2 clostridium alkalicellum str. z_7026 ;k__bacteria;p__firmicutes;c__clostridia;o__eubacteriales;f__oscillospiraceae;g__ruminiclostridium;s__clostridium alkalicellum;superkingdom__bacteria;	97.2772	0	679.353	7	17	0	0	0.00365682	0.010137	0	0	0.00459795
Zotu3026	ay959944.2 clostridium alkalicellum str. z_7026 ;k__bacteria;p__firmicutes;c__clostridia;o__eubacteriales;f__oscillospiraceae;g__ruminiclostridium;s__clostridium alkalicellum;superkingdom__bacteria;	95.297	0	644.187	0	21	0	0	0	0.0125222	0	0	0.00417407
Zotu2879	ay959944.2 clostridium alkalicellum str. z_7026 ;k__bacteria;p__firmicutes;c__clostridia;o__eubacteriales;f__oscillospiraceae;g__ruminiclostridium;s__clostridium alkalicellum;superkingdom__bacteria;	95.8025	0	650.499	1	21	1	1	0.000522403	0.0125222	0.000380852	0.00044482	0.00403034
Zotu3108	ay959944.2 clostridium alkalicellum str. z_7026 ;k__bacteria;p__firmicutes;c__clostridia;o__eubacteriales;f__oscillospiraceae;g__ruminiclostridium;s__clostridium alkalicellum;superkingdom__bacteria;	95.5556	0	646.892	0	19	1	0	0	0.0113296	0.000380852	0	0.00390349
Zotu2537	ay959944.2 clostridium alkalicellum str. z_7026 ;k__bacteria;p__firmicutes;c__clostridia;o__eubacteriales;f__oscillospiraceae;g__ruminiclostridium;s__clostridium alkalicellum;superkingdom__bacteria;	95.0617	1.10816e-180	637.875	5	14	0	0	0.00261202	0.00834814	0	0	0.00365339
Zotu2803	ay959944.2 clostridium alkalicellum str. z_7026 ;k__bacteria;p__firmicutes;c__clostridia;o__eubacteriales;f__oscillospiraceae;g__ruminiclostridium;s__clostridium alkalicellum;superkingdom__bacteria;	95.0495	0	639.679	10	8	0	0	0.00522403	0.00477037	0	0	0.00333147
Zotu2872	ay959944.2 clostridium alkalicellum str. z_7026 ;k__bacteria;p__firmicutes;c__clostridia;o__eubacteriales;f__oscillospiraceae;g__ruminiclostridium;s__clostridium alkalicellum;superkingdom__bacteria;	95.297	0	643.286	3	14	0	0	0.00156721	0.00834814	0	0	0.00330512
Zotu2596	ay960748.1 paenibacillus alkaliterrae str. ksl_134 ;k__bacteria;p__firmicutes;c__bacilli;o__bacillales;f__paenibacillaceae;g__paenibacillus;s__paenibacillus alkaliterrae;superkingdom__bacteria	97.8873	0	728.946	3	27	0	0	0.00156721	0.0161	0	0	0.00588907
Zotu1448	ay960771.1 detection and cultivation soil verrucomicrobia ellin508 ;k__bacteria;p__verrucomicrobia;c__spartobacteria;o__chthoniobacterales;f__chthoniobacteraceae;g__chthoniobacter;s__chthoniobacter flavus; superkingdom__bacteria;	93.8967	0	652.302	41	38	0	0	0.0214185	0.0226592	0	0	0.0146926
Zotu1264	ay960771.1 detection and cultivation soil verrucomicrobia ellin508 ;k__bacteria;p__verrucomicrobia;c__spartobacteria;o__chthoniobacterales;f__chthoniobacteraceae;g__chthoniobacter;s__chthoniobacter flavus; superkingdom__bacteria;	82.0513	4.69777e-116	424.176	7	0	82	0	0.00365682	0	0.0312299	0	0.0116289
Zotu2782	ay960771.1 detection and cultivation soil verrucomicrobia ellin508 ;k__bacteria;p__verrucomicrobia;c__spartobacteria;o__chthoniobacterales;f__chthoniobacteraceae;g__chthoniobacter;s__chthoniobacter flavus; superkingdom__bacteria;	94.1315	0	656.811	10	14	0	0	0.00522403	0.00834814	0	0	0.00452406
Zotu2051	ay999850.1 streptomyces ciscaucasicus str. ifo 12872 cssp717 ;k__bacteria;p__actinobacteria;c__actinomycetia;o__streptomycetales;f__streptomycetaceae;g__streptomyces;s__streptomyces ciscaucasicus;superkingdom__bacteria;	85.468	5.08494e-128	463.85	1	0	34	0	0.000522403	0	0.012949	0	0.00449046
Zotu889	azoarcus olearius ;k__bacteria;p__proteobacteria;c__betaproteobacteria;o__rhodocyclales;f__zoogloeaceae;g__azoarcus;s__azoarcus olearius; superkingdom__bacteria;	94.6136	0	666.729	19	0	110	0	0.00992566	0	0.0418937	0	0.0172731
Zotu250	azospira restricta ;k__bacteria;p__proteobacteria;c__betaproteobacteria;o__rhodocyclales;f__rhodocyclaceae;g__azospira;s__azospira restricta;superkingdom__bacteria	91.1007	2.9493e-169	600.005	288	83	150	0	0.150452	0.0494926	0.0571278	0	0.0856908
Zotu1986	azospira restricta ;k__bacteria;p__proteobacteria;c__betaproteobacteria;o__rhodocyclales;f__rhodocyclaceae;g__azospira;s__azospira restricta;superkingdom__bacteria	93.911	0	654.106	1	0	36	0	0.000522403	0	0.0137107	0	0.00474436
Zotu3044	ba000039.2 thermosynechococcus elongatus str. bp_1 ;k__bacteria;p__cyanobacteria;c__cyanobacteria;o__pseudanabaenales;f__thermosynechococcaceae;g__thermosynechococcus;s__thermosynechococcus elongatus; superkingdom__bacteria;	77.5561	6.98652e-82	310.564	5	1	4	0	0.00261202	0.000596296	0.00152341	0	0.00157724
Zotu2630	bacillus aquimaris ;k__bacteria;p__firmicutes;c__bacilli;o__bacillales;f__bacillaceae;g__bacillus;s__bacillus aquimaris;superkingdom__bacteria	100	0	773.128	6	18	0	0	0.00313442	0.0107333	0	0	0.00462258
Zotu449	bacillus circulans ;k__bacteria;p__firmicutes;c__bacilli;o__bacillales;f__bacillaceae;g__bacillus;s__bacillus circulans;superkingdom__bacteria	99.7658	0	766.816	65	236	0	1	0.0339562	0.140726	0	0.00044482	0.0577825
Zotu1382	bacillus circulans ;k__bacteria;p__firmicutes;c__bacilli;o__bacillales;f__bacillaceae;g__bacillus;s__bacillus circulans;superkingdom__bacteria	99.2974	0	757.8	9	75	0	0	0.00470163	0.0447222	0	0	0.0164746
Zotu1613	bacillus circulans ;k__bacteria;p__firmicutes;c__bacilli;o__bacillales;f__bacillaceae;g__bacillus;s__bacillus circulans;superkingdom__bacteria	99.5316	0	762.308	33	40	0	0	0.0172393	0.0238518	0	0	0.013697
Zotu2156	bacillus circulans ;k__bacteria;p__firmicutes;c__bacilli;o__bacillales;f__bacillaceae;g__bacillus;s__bacillus circulans;superkingdom__bacteria	99.7658	0	765.915	6	52	0	0	0.00313442	0.0310074	0	0	0.0113806
Zotu1656	bacillus circulans ;k__bacteria;p__firmicutes;c__bacilli;o__bacillales;f__bacillaceae;g__bacillus;s__bacillus circulans;superkingdom__bacteria	99.5316	0	762.308	1	39	0	0	0.000522403	0.0232555	0	0	0.00792598
Zotu2285	bacillus circulans ;k__bacteria;p__firmicutes;c__bacilli;o__bacillales;f__bacillaceae;g__bacillus;s__bacillus circulans;superkingdom__bacteria	97.6581	0	726.241	6	27	0	0	0.00313442	0.0161	0	0	0.00641147
Zotu2351	bacillus circulans ;k__bacteria;p__firmicutes;c__bacilli;o__bacillales;f__bacillaceae;g__bacillus;s__bacillus circulans;superkingdom__bacteria	99.2974	0	757.8	0	20	1	0	0	0.0119259	0.000380852	0	0.00410226
Zotu2470	bacillus firmus ;k__bacteria;p__firmicutes;c__bacilli;o__bacillales;f__bacillaceae;g__bacillus;s__bacillus firmus;superkingdom__bacteria	97.1963	0	719.027	0	27	0	0	0	0.0161	0	0	0.00536666
Zotu1425	bacillus foraminis ;k__bacteria;p__firmicutes;c__bacilli;o__bacillales;f__bacillaceae;g__bacillus;s__bacillus foraminis;superkingdom__bacteria	99.7658	0	766.816	29	51	1	0	0.0151497	0.0304111	0.000380852	0	0.0153139
Zotu2307	bacillus foraminis ;k__bacteria;p__firmicutes;c__bacilli;o__bacillales;f__bacillaceae;g__bacillus;s__bacillus foraminis;superkingdom__bacteria	99.2974	0	756.898	7	42	1	0	0.00365682	0.0250444	0.000380852	0	0.00969403
Zotu1444	bacillus foraminis ;k__bacteria;p__firmicutes;c__bacilli;o__bacillales;f__bacillaceae;g__bacillus;s__bacillus foraminis;superkingdom__bacteria	99.0632	0	753.291	2	46	0	0	0.00104481	0.0274296	0	0	0.00949147
Zotu2487	bacillus foraminis ;k__bacteria;p__firmicutes;c__bacilli;o__bacillales;f__bacillaceae;g__bacillus;s__bacillus foraminis;superkingdom__bacteria	98.829	0	748.783	14	28	0	0	0.00731365	0.0166963	0	0	0.00800331
Zotu2553	bacillus horti ;k__bacteria;p__firmicutes;c__bacilli;o__bacillales;f__bacillaceae;g__bacillus;s__bacillus horti;superkingdom__bacteria	88.6311	5.69853e-153	545.904	0	33	0	0	0	0.0196778	0	0	0.00655925
Zotu2457	bacillus horti ;k__bacteria;p__firmicutes;c__bacilli;o__bacillales;f__bacillaceae;g__bacillus;s__bacillus horti;superkingdom__bacteria	97.1963	0	719.027	3	23	0	0	0.00156721	0.0137148	0	0	0.005094
Zotu1753	bacillus infantis ;k__bacteria;p__firmicutes;c__bacilli;o__bacillales;f__bacillaceae;g__bacillus;s__bacillus infantis;superkingdom__bacteria	97.8972	0	732.552	10	55	0	0	0.00522403	0.0327963	0	0	0.0126734
Zotu901	bacillus macyae ;k__bacteria;p__firmicutes;c__bacilli;o__bacillales;f__bacillaceae;g__anaerobacillus;s__bacillus macyae;superkingdom__bacteria	79.9528	6.11593e-102	376.387	3	1	133	0	0.00156721	0.000596296	0.0506534	0	0.0176056
Zotu1729	bacillus massilioanorexius ap8 ;k__bacteria;p__firmicutes;c__bacilli;o__bacillales;f__bacillaceae;g__bacillus;s__bacillus massilioanorexius;superkingdom__bacteria	99.2974	0	757.8	2	39	0	0	0.00104481	0.0232555	0	0	0.00810011
Zotu2162	bacillus massilioanorexius ap8 ;k__bacteria;p__firmicutes;c__bacilli;o__bacillales;f__bacillaceae;g__bacillus;s__bacillus massilioanorexius;superkingdom__bacteria	99.0632	0	753.291	2	30	0	0	0.00104481	0.0178889	0	0	0.00631123
Zotu3199	bacillus massilioanorexius ap8 ;k__bacteria;p__firmicutes;c__bacilli;o__bacillales;f__bacillaceae;g__bacillus;s__bacillus massilioanorexius;superkingdom__bacteria	99.5316	0	762.308	7	19	0	1	0.00365682	0.0113296	0	0.00044482	0.00455066
Zotu710	bacillus niacini ;k__bacteria;p__firmicutes;c__bacilli;o__bacillales;f__bacillaceae;g__bacillus;s__bacillus niacini;superkingdom__bacteria	99.7658	0	765.915	1	17	192	2	0.000522403	0.010137	0.0731236	0.00088964	0.027038
Zotu882	bacillus niacini ;k__bacteria;p__firmicutes;c__bacilli;o__bacillales;f__bacillaceae;g__bacillus;s__bacillus niacini;superkingdom__bacteria	99.7658	0	765.915	28	98	0	0	0.0146273	0.058437	0	0	0.0243548
Zotu2122	bacillus niacini ;k__bacteria;p__firmicutes;c__bacilli;o__bacillales;f__bacillaceae;g__bacillus;s__bacillus niacini;superkingdom__bacteria	100	0	771.325	7	40	0	0	0.00365682	0.0238518	0	0	0.00916955
Zotu2017	bacillus niacini ;k__bacteria;p__firmicutes;c__bacilli;o__bacillales;f__bacillaceae;g__bacillus;s__bacillus niacini;superkingdom__bacteria	99.5316	0	762.308	9	33	0	0	0.00470163	0.0196778	0	0	0.00812646
Zotu2189	bacillus niacini ;k__bacteria;p__firmicutes;c__bacilli;o__bacillales;f__bacillaceae;g__bacillus;s__bacillus niacini;superkingdom__bacteria	100	0	771.325	6	32	1	0	0.00313442	0.0190815	0.000380852	0	0.00753225
Zotu2569	bacillus niacini ;k__bacteria;p__firmicutes;c__bacilli;o__bacillales;f__bacillaceae;g__bacillus;s__bacillus niacini;superkingdom__bacteria	99.2974	0	757.8	8	20	0	0	0.00417923	0.0119259	0	0	0.00536838
Zotu3021	bacillus niacini ;k__bacteria;p__firmicutes;c__bacilli;o__bacillales;f__bacillaceae;g__bacillus;s__bacillus niacini;superkingdom__bacteria	99.5316	0	762.308	3	16	0	0	0.00156721	0.00954073	0	0	0.00370265
Zotu1099	bacillus novalis ;k__bacteria;p__firmicutes;c__bacilli;o__bacillales;f__bacillaceae;g__bacillus;s__bacillus novalis;superkingdom__bacteria	99.2974	0	757.8	4	0	115	0	0.00208961	0	0.043798	0	0.0152959
Zotu1549	bacillus novalis ;k__bacteria;p__firmicutes;c__bacilli;o__bacillales;f__bacillaceae;g__bacillus;s__bacillus novalis;superkingdom__bacteria	99.0632	0	753.291	9	28	0	0	0.00470163	0.0166963	0	0	0.00713264
Zotu2617	bacillus pichinotyi ;k__bacteria;p__firmicutes;c__bacilli;o__bacillales;f__bacillaceae;g__bacillus;s__bacillus pichinotyi;superkingdom__bacteria	96.729	0	710.01	33	6	0	0	0.0172393	0.00357777	0	0	0.00693903
Zotu3143	bacillus schlegelii ;k__bacteria;p__firmicutes;c__bacilli;o__bacillales;f__bacillaceae;g__hydrogenibacillus;s__bacillus schlegelii;superkingdom__bacteria	80.1453	2.56116e-100	370.977	14	0	0	0	0.00731365	0	0	0	0.00243788
Zotu2810	bacillus songklensis ;k__bacteria;p__firmicutes;c__bacilli;o__bacillales;f__bacillaceae;g__bacillus;s__bacillus songklensis;superkingdom__bacteria	99.7664	0	767.718	3	31	0	0	0.00156721	0.0184852	0	0	0.00668413
Zotu1789	bacillus taeanensis ;k__bacteria;p__firmicutes;c__bacilli;o__bacillales;f__bacillaceae;g__bacillus;s__bacillus taeanensis;superkingdom__bacteria	96.2617	0	700.993	35	25	0	0	0.0182841	0.0149074	0	0	0.0110638
Zotu485	bacterium ellin514 ;k__bacteria;p__verrucomicrobia;c__verrucomicrobiae;o__verrucomicrobiales;f__verrucomicrobia subdivision 3;g__pedosphaera;s__pedosphaera parvula;superkingdom__bacteria;superphylum__chlamydiae/verrucomicrobia group	91.8415	5.67908e-172	609.022	41	38	216	1	0.0214185	0.0226592	0.0822641	0.00044482	0.0416691
Zotu669	bacterium ellin514 ;k__bacteria;p__verrucomicrobia;c__verrucomicrobiae;o__verrucomicrobiales;f__verrucomicrobia subdivision 3;g__pedosphaera;s__pedosphaera parvula;superkingdom__bacteria;superphylum__chlamydiae/verrucomicrobia group	92.5408	2.1164e-177	627.055	91	86	1	0	0.0475387	0.0512814	0.000380852	0	0.033067
Zotu949	bacterium ellin514 ;k__bacteria;p__verrucomicrobia;c__verrucomicrobiae;o__verrucomicrobiales;f__verrucomicrobia subdivision 3;g__pedosphaera;s__pedosphaera parvula;superkingdom__bacteria;superphylum__chlamydiae/verrucomicrobia group	91.784	1.62708e-172	610.825	81	8	133	0	0.0423147	0.00477037	0.0506534	0	0.0325795
Zotu694	bacterium ellin514 ;k__bacteria;p__verrucomicrobia;c__verrucomicrobiae;o__verrucomicrobiales;f__verrucomicrobia subdivision 3;g__pedosphaera;s__pedosphaera parvula;superkingdom__bacteria;superphylum__chlamydiae/verrucomicrobia group	91.784	1.62708e-172	610.825	62	93	0	0	0.032389	0.0554555	0	0	0.0292815
Zotu572	bacterium ellin514 ;k__bacteria;p__verrucomicrobia;c__verrucomicrobiae;o__verrucomicrobiales;f__verrucomicrobia subdivision 3;g__pedosphaera;s__pedosphaera parvula;superkingdom__bacteria;superphylum__chlamydiae/verrucomicrobia group	91.0798	1.0268e-168	598.201	2	0	218	0	0.00104481	0	0.0830258	0	0.0280235
Zotu795	bacterium ellin514 ;k__bacteria;p__verrucomicrobia;c__verrucomicrobiae;o__verrucomicrobiales;f__verrucomicrobia subdivision 3;g__pedosphaera;s__pedosphaera parvula;superkingdom__bacteria;superphylum__chlamydiae/verrucomicrobia group	92.7059	2.1164e-177	627.055	120	36	0	1	0.0626884	0.0214666	0	0.00044482	0.0276069
Zotu925	bacterium ellin514 ;k__bacteria;p__verrucomicrobia;c__verrucomicrobiae;o__verrucomicrobiales;f__verrucomicrobia subdivision 3;g__pedosphaera;s__pedosphaera parvula;superkingdom__bacteria;superphylum__chlamydiae/verrucomicrobia group	91.2941	2.94184e-169	600.005	104	42	0	0	0.0543299	0.0250444	0	0	0.0264581
Zotu705	bacterium ellin514 ;k__bacteria;p__verrucomicrobia;c__verrucomicrobiae;o__verrucomicrobiales;f__verrucomicrobia subdivision 3;g__pedosphaera;s__pedosphaera parvula;superkingdom__bacteria;superphylum__chlamydiae/verrucomicrobia group	90.6323	2.26168e-164	583.774	5	1	197	1	0.00261202	0.000596296	0.0750279	0.00044482	0.0256339
Zotu907	bacterium ellin514 ;k__bacteria;p__verrucomicrobia;c__verrucomicrobiae;o__verrucomicrobiales;f__verrucomicrobia subdivision 3;g__pedosphaera;s__pedosphaera parvula;superkingdom__bacteria;superphylum__chlamydiae/verrucomicrobia group	89.6714	1.42728e-160	571.151	81	53	0	0	0.0423147	0.0316037	0	0	0.0246394
Zotu818	bacterium ellin514 ;k__bacteria;p__verrucomicrobia;c__verrucomicrobiae;o__verrucomicrobiales;f__verrucomicrobia subdivision 3;g__pedosphaera;s__pedosphaera parvula;superkingdom__bacteria;superphylum__chlamydiae/verrucomicrobia group	89.4366	6.06894e-159	565.741	29	1	143	2	0.0151497	0.000596296	0.0544619	0.00088964	0.022513
Zotu794	bacterium ellin514 ;k__bacteria;p__verrucomicrobia;c__verrucomicrobiae;o__verrucomicrobiales;f__verrucomicrobia subdivision 3;g__pedosphaera;s__pedosphaera parvula;superkingdom__bacteria;superphylum__chlamydiae/verrucomicrobia group	90.8879	1.52391e-166	590.988	0	0	176	0	0	0	0.06703	0	0.0223433
Zotu1148	bacterium ellin514 ;k__bacteria;p__verrucomicrobia;c__verrucomicrobiae;o__verrucomicrobiales;f__verrucomicrobia subdivision 3;g__pedosphaera;s__pedosphaera parvula;superkingdom__bacteria;superphylum__chlamydiae/verrucomicrobia group	89.2019	7.39348e-158	562.134	83	5	50	0	0.0433595	0.00298148	0.0190426	0	0.0217945
Zotu1000	bacterium ellin514 ;k__bacteria;p__verrucomicrobia;c__verrucomicrobiae;o__verrucomicrobiales;f__verrucomicrobia subdivision 3;g__pedosphaera;s__pedosphaera parvula;superkingdom__bacteria;superphylum__chlamydiae/verrucomicrobia group	92.2535	3.14101e-175	619.842	67	42	0	0	0.035001	0.0250444	0	0	0.0200151
Zotu1120	bacterium ellin514 ;k__bacteria;p__verrucomicrobia;c__verrucomicrobiae;o__verrucomicrobiales;f__verrucomicrobia subdivision 3;g__pedosphaera;s__pedosphaera parvula;superkingdom__bacteria;superphylum__chlamydiae/verrucomicrobia group	92.3077	8.99915e-176	622.547	23	70	14	0	0.0120153	0.0417407	0.00533193	0	0.019696
Zotu733	bacterium ellin514 ;k__bacteria;p__verrucomicrobia;c__verrucomicrobiae;o__verrucomicrobiales;f__verrucomicrobia subdivision 3;g__pedosphaera;s__pedosphaera parvula;superkingdom__bacteria;superphylum__chlamydiae/verrucomicrobia group	89.1765	2.58058e-157	560.331	1	0	155	1	0.000522403	0	0.0590321	0.00044482	0.0194067
Zotu964	bacterium ellin514 ;k__bacteria;p__verrucomicrobia;c__verrucomicrobiae;o__verrucomicrobiales;f__verrucomicrobia subdivision 3;g__pedosphaera;s__pedosphaera parvula;superkingdom__bacteria;superphylum__chlamydiae/verrucomicrobia group	89.2019	7.39348e-158	562.134	49	37	30	1	0.0255978	0.0220629	0.0114256	0.00044482	0.0192506
Zotu911	bacterium ellin514 ;k__bacteria;p__verrucomicrobia;c__verrucomicrobiae;o__verrucomicrobiales;f__verrucomicrobia subdivision 3;g__pedosphaera;s__pedosphaera parvula;superkingdom__bacteria;superphylum__chlamydiae/verrucomicrobia group	91.5294	6.91854e-171	605.415	27	0	113	0	0.0141049	0	0.0430363	0	0.0190471
Zotu917	bacterium ellin514 ;k__bacteria;p__verrucomicrobia;c__verrucomicrobiae;o__verrucomicrobiales;f__verrucomicrobia subdivision 3;g__pedosphaera;s__pedosphaera parvula;superkingdom__bacteria;superphylum__chlamydiae/verrucomicrobia group	92.5059	3.14101e-175	619.842	7	1	125	1	0.00365682	0.000596296	0.0476065	0.00044482	0.0168417
Zotu1462	bacterium ellin514 ;k__bacteria;p__verrucomicrobia;c__verrucomicrobiae;o__verrucomicrobiales;f__verrucomicrobia subdivision 3;g__pedosphaera;s__pedosphaera parvula;superkingdom__bacteria;superphylum__chlamydiae/verrucomicrobia group	93.2084	4.09598e-180	636.974	16	0	86	0	0.00835845	0	0.0327533	0	0.0137039
Zotu1075	bacterium ellin514 ;k__bacteria;p__verrucomicrobia;c__verrucomicrobiae;o__verrucomicrobiales;f__verrucomicrobia subdivision 3;g__pedosphaera;s__pedosphaera parvula;superkingdom__bacteria;superphylum__chlamydiae/verrucomicrobia group	91.6084	5.67908e-172	609.022	18	0	80	0	0.00940326	0	0.0304682	0	0.0132905
Zotu1630	bacterium ellin514 ;k__bacteria;p__verrucomicrobia;c__verrucomicrobiae;o__verrucomicrobiales;f__verrucomicrobia subdivision 3;g__pedosphaera;s__pedosphaera parvula;superkingdom__bacteria;superphylum__chlamydiae/verrucomicrobia group	89.6714	1.42728e-160	571.151	34	37	0	0	0.0177617	0.0220629	0	0	0.0132749
Zotu1321	bacterium ellin514 ;k__bacteria;p__verrucomicrobia;c__verrucomicrobiae;o__verrucomicrobiales;f__verrucomicrobia subdivision 3;g__pedosphaera;s__pedosphaera parvula;superkingdom__bacteria;superphylum__chlamydiae/verrucomicrobia group	92.2535	3.14101e-175	620.743	56	16	0	0	0.0292546	0.00954073	0	0	0.0129318
Zotu1200	bacterium ellin514 ;k__bacteria;p__verrucomicrobia;c__verrucomicrobiae;o__verrucomicrobiales;f__verrucomicrobia subdivision 3;g__pedosphaera;s__pedosphaera parvula;superkingdom__bacteria;superphylum__chlamydiae/verrucomicrobia group	91.3349	3.58389e-168	597.3	3	0	97	0	0.00156721	0	0.0369427	0	0.0128366
Zotu1380	bacterium ellin514 ;k__bacteria;p__verrucomicrobia;c__verrucomicrobiae;o__verrucomicrobiales;f__verrucomicrobia subdivision 3;g__pedosphaera;s__pedosphaera parvula;superkingdom__bacteria;superphylum__chlamydiae/verrucomicrobia group	90.8451	4.36607e-167	593.693	40	1	45	1	0.0208961	0.000596296	0.0171384	0.00044482	0.0124321
Zotu1475	bacterium ellin514 ;k__bacteria;p__verrucomicrobia;c__verrucomicrobiae;o__verrucomicrobiales;f__verrucomicrobia subdivision 3;g__pedosphaera;s__pedosphaera parvula;superkingdom__bacteria;superphylum__chlamydiae/verrucomicrobia group	90.9302	1.2509e-167	594.595	21	44	0	0	0.0109705	0.026237	0	0	0.0124025
Zotu1539	bacterium ellin514 ;k__bacteria;p__verrucomicrobia;c__verrucomicrobiae;o__verrucomicrobiales;f__verrucomicrobia subdivision 3;g__pedosphaera;s__pedosphaera parvula;superkingdom__bacteria;superphylum__chlamydiae/verrucomicrobia group	89.6956	6.06894e-159	565.741	26	0	47	0	0.0135825	0	0.0179001	0	0.0104942
Zotu1716	bacterium ellin514 ;k__bacteria;p__verrucomicrobia;c__verrucomicrobiae;o__verrucomicrobiales;f__verrucomicrobia subdivision 3;g__pedosphaera;s__pedosphaera parvula;superkingdom__bacteria;superphylum__chlamydiae/verrucomicrobia group	90.4206	7.89404e-164	582.873	15	39	0	0	0.00783605	0.0232555	0	0	0.0103639
Zotu1501	bacterium ellin514 ;k__bacteria;p__verrucomicrobia;c__verrucomicrobiae;o__verrucomicrobiales;f__verrucomicrobia subdivision 3;g__pedosphaera;s__pedosphaera parvula;superkingdom__bacteria;superphylum__chlamydiae/verrucomicrobia group	91.8415	2.41481e-170	603.611	16	0	59	0	0.00835845	0	0.0224703	0	0.0102762
Zotu1548	bacterium ellin514 ;k__bacteria;p__verrucomicrobia;c__verrucomicrobiae;o__verrucomicrobiales;f__verrucomicrobia subdivision 3;g__pedosphaera;s__pedosphaera parvula;superkingdom__bacteria;superphylum__chlamydiae/verrucomicrobia group	88.7324	3.82992e-155	553.117	57	0	2	0	0.029777	0	0.000761705	0	0.0101796
Zotu1891	bacterium ellin514 ;k__bacteria;p__verrucomicrobia;c__verrucomicrobiae;o__verrucomicrobiales;f__verrucomicrobia subdivision 3;g__pedosphaera;s__pedosphaera parvula;superkingdom__bacteria;superphylum__chlamydiae/verrucomicrobia group	91.3551	2.9493e-169	600.005	17	35	0	0	0.00888086	0.0208704	0	0	0.00991707
Zotu2130	bacterium ellin514 ;k__bacteria;p__verrucomicrobia;c__verrucomicrobiae;o__verrucomicrobiales;f__verrucomicrobia subdivision 3;g__pedosphaera;s__pedosphaera parvula;superkingdom__bacteria;superphylum__chlamydiae/verrucomicrobia group	89.2019	7.39348e-158	562.134	21	25	0	0	0.0109705	0.0149074	0	0	0.00862595
Zotu1563	bacterium ellin514 ;k__bacteria;p__verrucomicrobia;c__verrucomicrobiae;o__verrucomicrobiales;f__verrucomicrobia subdivision 3;g__pedosphaera;s__pedosphaera parvula;superkingdom__bacteria;superphylum__chlamydiae/verrucomicrobia group	91.0798	1.0268e-168	598.201	6	0	58	0	0.00313442	0	0.0220894	0	0.00840795
Zotu1995	bacterium ellin514 ;k__bacteria;p__verrucomicrobia;c__verrucomicrobiae;o__verrucomicrobiales;f__verrucomicrobia subdivision 3;g__pedosphaera;s__pedosphaera parvula;superkingdom__bacteria;superphylum__chlamydiae/verrucomicrobia group	82.093	2.94964e-112	411.553	1	1	58	0	0.000522403	0.000596296	0.0220894	0	0.00773604
Zotu1966	bacterium ellin514 ;k__bacteria;p__verrucomicrobia;c__verrucomicrobiae;o__verrucomicrobiales;f__verrucomicrobia subdivision 3;g__pedosphaera;s__pedosphaera parvula;superkingdom__bacteria;superphylum__chlamydiae/verrucomicrobia group	90.1639	1.17158e-161	574.758	44	0	0	0	0.0229857	0	0	0	0.00766191
Zotu1744	bacterium ellin514 ;k__bacteria;p__verrucomicrobia;c__verrucomicrobiae;o__verrucomicrobiales;f__verrucomicrobia subdivision 3;g__pedosphaera;s__pedosphaera parvula;superkingdom__bacteria;superphylum__chlamydiae/verrucomicrobia group	92	1.33559e-173	614.432	41	1	0	0	0.0214185	0.000596296	0	0	0.00733828
Zotu3119	bacterium ellin514 ;k__bacteria;p__verrucomicrobia;c__verrucomicrobiae;o__verrucomicrobiales;f__verrucomicrobia subdivision 3;g__pedosphaera;s__pedosphaera parvula;superkingdom__bacteria;superphylum__chlamydiae/verrucomicrobia group	89.4366	6.06894e-159	566.642	11	27	0	0	0.00574644	0.0161	0	0	0.00728214
Zotu1699	bacterium ellin514 ;k__bacteria;p__verrucomicrobia;c__verrucomicrobiae;o__verrucomicrobiales;f__verrucomicrobia subdivision 3;g__pedosphaera;s__pedosphaera parvula;superkingdom__bacteria;superphylum__chlamydiae/verrucomicrobia group	90.1639	1.17158e-161	574.758	44	0	0	1	0.0229857	0	0	0.00044482	0.00721709
Zotu1526	bacterium ellin514 ;k__bacteria;p__verrucomicrobia;c__verrucomicrobiae;o__verrucomicrobiales;f__verrucomicrobia subdivision 3;g__pedosphaera;s__pedosphaera parvula;superkingdom__bacteria;superphylum__chlamydiae/verrucomicrobia group	90.3756	2.26168e-164	583.774	0	0	59	1	0	0	0.0224703	0.00044482	0.00704527
Zotu2642	bacterium ellin514 ;k__bacteria;p__verrucomicrobia;c__verrucomicrobiae;o__verrucomicrobiales;f__verrucomicrobia subdivision 3;g__pedosphaera;s__pedosphaera parvula;superkingdom__bacteria;superphylum__chlamydiae/verrucomicrobia group	92.723	6.06358e-178	629.76	40	0	0	1	0.0208961	0	0	0.00044482	0.00652056
Zotu2604	bacterium ellin514 ;k__bacteria;p__verrucomicrobia;c__verrucomicrobiae;o__verrucomicrobiales;f__verrucomicrobia subdivision 3;g__pedosphaera;s__pedosphaera parvula;superkingdom__bacteria;superphylum__chlamydiae/verrucomicrobia group	93.662	0	647.794	31	4	0	0	0.0161945	0.00238518	0	0	0.00619323
Zotu3171	bacterium ellin514 ;k__bacteria;p__verrucomicrobia;c__verrucomicrobiae;o__verrucomicrobiales;f__verrucomicrobia subdivision 3;g__pedosphaera;s__pedosphaera parvula;superkingdom__bacteria;superphylum__chlamydiae/verrucomicrobia group	92.4883	7.38695e-177	625.252	13	19	0	0	0.00679124	0.0113296	0	0	0.00604029
Zotu1777	bacterium ellin514 ;k__bacteria;p__verrucomicrobia;c__verrucomicrobiae;o__verrucomicrobiales;f__verrucomicrobia subdivision 3;g__pedosphaera;s__pedosphaera parvula;superkingdom__bacteria;superphylum__chlamydiae/verrucomicrobia group	91.8605	1.98219e-171	607.218	0	0	46	0	0	0	0.0175192	0	0.00583973
Zotu2166	bacterium ellin514 ;k__bacteria;p__verrucomicrobia;c__verrucomicrobiae;o__verrucomicrobiales;f__verrucomicrobia subdivision 3;g__pedosphaera;s__pedosphaera parvula;superkingdom__bacteria;superphylum__chlamydiae/verrucomicrobia group	88.4977	1.62852e-153	547.707	7	23	0	0	0.00365682	0.0137148	0	0	0.00579054
Zotu2953	bacterium ellin514 ;k__bacteria;p__verrucomicrobia;c__verrucomicrobiae;o__verrucomicrobiales;f__verrucomicrobia subdivision 3;g__pedosphaera;s__pedosphaera parvula;superkingdom__bacteria;superphylum__chlamydiae/verrucomicrobia group	91.6084	2.94184e-169	600.005	1	27	1	0	0.000522403	0.0161	0.000380852	0	0.00566775
Zotu2217	bacterium ellin514 ;k__bacteria;p__verrucomicrobia;c__verrucomicrobiae;o__verrucomicrobiales;f__verrucomicrobia subdivision 3;g__pedosphaera;s__pedosphaera parvula;superkingdom__bacteria;superphylum__chlamydiae/verrucomicrobia group	90.3756	2.26168e-164	583.774	32	0	0	0	0.0167169	0	0	0	0.0055723
Zotu2653	bacterium ellin514 ;k__bacteria;p__verrucomicrobia;c__verrucomicrobiae;o__verrucomicrobiales;f__verrucomicrobia subdivision 3;g__pedosphaera;s__pedosphaera parvula;superkingdom__bacteria;superphylum__chlamydiae/verrucomicrobia group	92.3077	8.99915e-176	622.547	0	26	0	0	0	0.0155037	0	0	0.0051679
Zotu2019	bacterium ellin514 ;k__bacteria;p__verrucomicrobia;c__verrucomicrobiae;o__verrucomicrobiales;f__verrucomicrobia subdivision 3;g__pedosphaera;s__pedosphaera parvula;superkingdom__bacteria;superphylum__chlamydiae/verrucomicrobia group	93.4426	0	641.482	18	0	16	0	0.00940326	0	0.00609364	0	0.00516563
Zotu2184	bacterium ellin514 ;k__bacteria;p__verrucomicrobia;c__verrucomicrobiae;o__verrucomicrobiales;f__verrucomicrobia subdivision 3;g__pedosphaera;s__pedosphaera parvula;superkingdom__bacteria;superphylum__chlamydiae/verrucomicrobia group	91.5493	1.98219e-171	607.218	25	0	0	0	0.0130601	0	0	0	0.00435336
Zotu2635	bacterium ellin514 ;k__bacteria;p__verrucomicrobia;c__verrucomicrobiae;o__verrucomicrobiales;f__verrucomicrobia subdivision 3;g__pedosphaera;s__pedosphaera parvula;superkingdom__bacteria;superphylum__chlamydiae/verrucomicrobia group	92.0746	5.67908e-172	609.022	25	0	0	0	0.0130601	0	0	0	0.00435336
Zotu2786	bacterium ellin514 ;k__bacteria;p__verrucomicrobia;c__verrucomicrobiae;o__verrucomicrobiales;f__verrucomicrobia subdivision 3;g__pedosphaera;s__pedosphaera parvula;superkingdom__bacteria;superphylum__chlamydiae/verrucomicrobia group	89.6471	4.98169e-160	569.347	2	15	8	0	0.00104481	0.00894444	0.00304682	0	0.00434535
Zotu2768	bacterium ellin514 ;k__bacteria;p__verrucomicrobia;c__verrucomicrobiae;o__verrucomicrobiales;f__verrucomicrobia subdivision 3;g__pedosphaera;s__pedosphaera parvula;superkingdom__bacteria;superphylum__chlamydiae/verrucomicrobia group	90.1639	1.17158e-161	574.758	23	0	0	0	0.0120153	0	0	0	0.00400509
Zotu2393	bacterium ellin514 ;k__bacteria;p__verrucomicrobia;c__verrucomicrobiae;o__verrucomicrobiales;f__verrucomicrobia subdivision 3;g__pedosphaera;s__pedosphaera parvula;superkingdom__bacteria;superphylum__chlamydiae/verrucomicrobia group	91.5493	1.98219e-171	607.218	22	0	0	0	0.0114929	0	0	0	0.00383096
Zotu2840	bacterium ellin514 ;k__bacteria;p__verrucomicrobia;c__verrucomicrobiae;o__verrucomicrobiales;f__verrucomicrobia subdivision 3;g__pedosphaera;s__pedosphaera parvula;superkingdom__bacteria;superphylum__chlamydiae/verrucomicrobia group	90.1408	2.75529e-163	580.168	21	0	0	0	0.0109705	0	0	0	0.00365682
Zotu3073	bacterium ellin514 ;k__bacteria;p__verrucomicrobia;c__verrucomicrobiae;o__verrucomicrobiales;f__verrucomicrobia subdivision 3;g__pedosphaera;s__pedosphaera parvula;superkingdom__bacteria;superphylum__chlamydiae/verrucomicrobia group	90.8879	7.89404e-164	581.971	1	0	22	0	0.000522403	0	0.00837875	0	0.00296705
Zotu135	bacterium ellin514 ;k__bacteria;p__verrucomicrobia;c__verrucomicrobiae;o__verrucomicrobiales;f__verrucomicrobia subdivision 3;g__pedosphaera;s__pedosphaera parvula;superkingdom__bacteria;superphylum__chlamydiae/verrucomicrobia group	91.5294	6.91854e-171	605.415	192	111	333	483	0.100301	0.0661888	0.126824	0.214848	-0.117077
Zotu130	bacteroidales bacterium fu11_5 ;k__bacteria;p__bacteroidetes;c__bacteroidia;o__marinilabiliales;f__prolixibacteraceae;g__mariniphaga;s__bacteroidales bacterium; superkingdom__bacteria;	86.4929	1.72265e-140	504.426	375	117	347	4	0.195901	0.0697666	0.132156	0.00177928	0.130829
Zotu151	bacteroidales bacterium fu11_5 ;k__bacteria;p__bacteroidetes;c__bacteroidia;o__marinilabiliales;f__prolixibacteraceae;g__mariniphaga;s__bacteroidales bacterium; superkingdom__bacteria;	86.4929	1.72265e-140	505.328	87	84	644	3	0.0454491	0.0500888	0.245269	0.00133446	0.112268
Zotu468	bacteroidales bacterium fu11_5 ;k__bacteria;p__bacteroidetes;c__bacteroidia;o__marinilabiliales;f__prolixibacteraceae;g__mariniphaga;s__bacteroidales bacterium; superkingdom__bacteria;	86.2559	2.09861e-139	500.819	2	2	309	2	0.00104481	0.00119259	0.117683	0.00088964	0.0390839
Zotu590	bacteroidales bacterium fu11_5 ;k__bacteria;p__bacteroidetes;c__bacteroidia;o__marinilabiliales;f__prolixibacteraceae;g__mariniphaga;s__bacteroidales bacterium; superkingdom__bacteria;	85.782	1.08711e-136	491.803	23	5	235	2	0.0120153	0.00298148	0.0895003	0.00088964	0.0339427
Zotu645	bacteroidales bacterium fu11_5 ;k__bacteria;p__bacteroidetes;c__bacteroidia;o__marinilabiliales;f__prolixibacteraceae;g__mariniphaga;s__bacteroidales bacterium; superkingdom__bacteria;	86.2559	2.09861e-139	500.819	17	2	209	0	0.00888086	0.00119259	0.0795981	0	0.0298905
Zotu897	bacteroidales bacterium fu11_5 ;k__bacteria;p__bacteroidetes;c__bacteroidia;o__marinilabiliales;f__prolixibacteraceae;g__mariniphaga;s__bacteroidales bacterium; superkingdom__bacteria;	86.019	8.92353e-138	495.409	23	13	87	1	0.0120153	0.00775185	0.0331341	0.00044482	0.0171889
Zotu1512	bacteroidales bacterium fu11_5 ;k__bacteria;p__bacteroidetes;c__bacteroidia;o__marinilabiliales;f__prolixibacteraceae;g__mariniphaga;s__bacteroidales bacterium; superkingdom__bacteria;	87.6777	1.50977e-147	527.87	9	0	53	0	0.00470163	0	0.0201852	0	0.0082956
Zotu2292	bacteroidales bacterium fu11_5 ;k__bacteria;p__bacteroidetes;c__bacteroidia;o__marinilabiliales;f__prolixibacteraceae;g__mariniphaga;s__bacteroidales bacterium; superkingdom__bacteria;	87.6777	1.50977e-147	527.87	38	0	0	0	0.0198513	0	0	0	0.00661711
Zotu2047	bacteroides xylanolyticus ;k__bacteria;p__bacteroidetes;c__bacteroidia;o__bacteroidales;f__bacteroidaceae;g__bacteroides;s__bacteroides xylanolyticus;superkingdom__bacteria;superphylum__bacteroidetes/chlorobi group	99.7512	0	721.732	7	30	1	0	0.00365682	0.0178889	0.000380852	0	0.00730885
Zotu1117	bacteroidetes bacterium dqhs_15 ;k__bacteria;p__bacteroidetes;c__bacteroidia;o__marinilabiliales;f__prolixibacteraceae;g__sunxiuqinia;s__bacteroidetes bacterium; superkingdom__bacteria;	86.4929	1.72265e-140	505.328	41	11	60	0	0.0214185	0.00655925	0.0228511	0	0.016943
Zotu1011	bacteroidetes bacterium dqhs_15 ;k__bacteria;p__bacteroidetes;c__bacteroidia;o__marinilabiliales;f__prolixibacteraceae;g__sunxiuqinia;s__bacteroidetes bacterium; superkingdom__bacteria;	90.0474	4.0477e-161	572.954	0	2	117	2	0	0.00119259	0.0445597	0.00088964	0.0143611
Zotu606	balnearium lithotrophicum ;k__bacteria;p__aquificae;c__aquificae;o__desulfurobacteriales;f__desulfurobacteriaceae;g__balnearium;s__balnearium lithotrophicum;superkingdom__bacteria	76.4706	2.10958e-82	311.466	27	0	223	1	0.0141049	0	0.0849301	0.00044482	0.0325668
Zotu1176	bauldia consociata ;k__bacteria;p__proteobacteria;c__alphaproteobacteria;o__hyphomicrobiales;f__kaistiaceae;g__bauldia;s__bauldia consociata;superkingdom__bacteria;	97.7723	0	681.156	75	0	0	0	0.0391802	0	0	0	0.0130601
Zotu5	bellilinea caldifistulae ;k__bacteria;p__chloroflexi;c__anaerolineae;o__anaerolineales;f__anaerolineaceae;g__bellilinea;s__bellilinea caldifistulae;superkingdom__bacteria	88.5856	2.13154e-145	520.657	4537	2473	5604	57	2.37014	1.47464	2.1343	0.0253547	1.96767
Zotu68	bellilinea caldifistulae ;k__bacteria;p__chloroflexi;c__anaerolineae;o__anaerolineales;f__anaerolineaceae;g__bellilinea;s__bellilinea caldifistulae;superkingdom__bacteria	88.0893	1.10416e-142	511.64	544	454	545	3	0.284187	0.270718	0.207564	0.00133446	0.252822
Zotu82	bellilinea caldifistulae ;k__bacteria;p__chloroflexi;c__anaerolineae;o__anaerolineales;f__anaerolineaceae;g__bellilinea;s__bellilinea caldifistulae;superkingdom__bacteria	88.6139	9.06352e-144	515.246	454	320	660	13	0.237171	0.190815	0.251362	0.00578266	0.220667
Zotu177	bellilinea caldifistulae ;k__bacteria;p__chloroflexi;c__anaerolineae;o__anaerolineales;f__anaerolineaceae;g__bellilinea;s__bellilinea caldifistulae;superkingdom__bacteria	85.8911	1.43749e-128	464.752	133	172	425	1	0.0694796	0.102563	0.161862	0.00044482	0.110857
Zotu220	bellilinea caldifistulae ;k__bacteria;p__chloroflexi;c__anaerolineae;o__anaerolineales;f__anaerolineaceae;g__bellilinea;s__bellilinea caldifistulae;superkingdom__bacteria	87	1.25985e-135	488.196	193	81	322	3	0.100824	0.0483	0.122634	0.00133446	0.0892516
Zotu257	bellilinea caldifistulae ;k__bacteria;p__chloroflexi;c__anaerolineae;o__anaerolineales;f__anaerolineaceae;g__bellilinea;s__bellilinea caldifistulae;superkingdom__bacteria	86.75	5.35702e-134	483.687	102	34	347	5	0.0532851	0.0202741	0.132156	0.0022241	0.0663475
Zotu349	bellilinea caldifistulae ;k__bacteria;p__chloroflexi;c__anaerolineae;o__anaerolineales;f__anaerolineaceae;g__bellilinea;s__bellilinea caldifistulae;superkingdom__bacteria	88.6139	9.06352e-144	515.246	54	45	319	2	0.0282098	0.0268333	0.121492	0.00088964	0.0579553
Zotu411	bellilinea caldifistulae ;k__bacteria;p__chloroflexi;c__anaerolineae;o__anaerolineales;f__anaerolineaceae;g__bellilinea;s__bellilinea caldifistulae;superkingdom__bacteria	89.0819	4.11483e-148	529.673	134	132	29	1	0.070002	0.078711	0.0110447	0.00044482	0.0528078
Zotu559	bellilinea caldifistulae ;k__bacteria;p__chloroflexi;c__anaerolineae;o__anaerolineales;f__anaerolineaceae;g__bellilinea;s__bellilinea caldifistulae;superkingdom__bacteria	92.3077	1.74813e-165	588.283	90	30	139	1	0.0470163	0.0178889	0.0529385	0.00044482	0.0388364
Zotu487	bellilinea caldifistulae ;k__bacteria;p__chloroflexi;c__anaerolineae;o__anaerolineales;f__anaerolineaceae;g__bellilinea;s__bellilinea caldifistulae;superkingdom__bacteria	88.1481	1.99637e-139	500.819	26	38	192	1	0.0135825	0.0226592	0.0731236	0.00044482	0.0360103
Zotu608	bellilinea caldifistulae ;k__bacteria;p__chloroflexi;c__anaerolineae;o__anaerolineales;f__anaerolineaceae;g__bellilinea;s__bellilinea caldifistulae;superkingdom__bacteria	89.0819	4.11483e-148	529.673	61	34	110	1	0.0318666	0.0202741	0.0418937	0.00044482	0.0309
Zotu712	bellilinea caldifistulae ;k__bacteria;p__chloroflexi;c__anaerolineae;o__anaerolineales;f__anaerolineaceae;g__bellilinea;s__bellilinea caldifistulae;superkingdom__bacteria	89.33	3.37766e-149	533.28	66	68	15	1	0.0344786	0.0405481	0.00571278	0.00044482	0.0264684
Zotu672	bellilinea caldifistulae ;k__bacteria;p__chloroflexi;c__anaerolineae;o__anaerolineales;f__anaerolineaceae;g__bellilinea;s__bellilinea caldifistulae;superkingdom__bacteria	87.5312	1.03415e-136	491.803	38	9	136	1	0.0198513	0.00536666	0.0517959	0.00044482	0.0252265
Zotu738	bellilinea caldifistulae ;k__bacteria;p__chloroflexi;c__anaerolineae;o__anaerolineales;f__anaerolineaceae;g__bellilinea;s__bellilinea caldifistulae;superkingdom__bacteria	90.3226	1.25874e-154	552.215	87	17	28	0	0.0454491	0.010137	0.0106639	0	0.0220833
Zotu892	bellilinea caldifistulae ;k__bacteria;p__chloroflexi;c__anaerolineae;o__anaerolineales;f__anaerolineaceae;g__bellilinea;s__bellilinea caldifistulae;superkingdom__bacteria	89.5782	7.9435e-151	538.69	73	30	19	0	0.0381354	0.0178889	0.00723619	0	0.0210868
Zotu841	bellilinea caldifistulae ;k__bacteria;p__chloroflexi;c__anaerolineae;o__anaerolineales;f__anaerolineaceae;g__bellilinea;s__bellilinea caldifistulae;superkingdom__bacteria	87.9012	8.4888e-138	495.409	2	15	125	0	0.00104481	0.00894444	0.0476065	0	0.0191986
Zotu1047	bellilinea caldifistulae ;k__bacteria;p__chloroflexi;c__anaerolineae;o__anaerolineales;f__anaerolineaceae;g__bellilinea;s__bellilinea caldifistulae;superkingdom__bacteria	87.0324	5.35702e-134	482.786	59	13	35	0	0.0308218	0.00775185	0.0133298	0	0.0173012
Zotu1114	bellilinea caldifistulae ;k__bacteria;p__chloroflexi;c__anaerolineae;o__anaerolineales;f__anaerolineaceae;g__bellilinea;s__bellilinea caldifistulae;superkingdom__bacteria	87.0968	2.96288e-137	493.606	13	13	76	0	0.00679124	0.00775185	0.0289448	0	0.014496
Zotu996	bellilinea caldifistulae ;k__bacteria;p__chloroflexi;c__anaerolineae;o__anaerolineales;f__anaerolineaceae;g__bellilinea;s__bellilinea caldifistulae;superkingdom__bacteria	87.8412	4.69502e-141	506.23	8	0	106	1	0.00417923	0	0.0403703	0.00044482	0.014405
Zotu1084	bellilinea caldifistulae ;k__bacteria;p__chloroflexi;c__anaerolineae;o__anaerolineales;f__anaerolineaceae;g__bellilinea;s__bellilinea caldifistulae;superkingdom__bacteria	91.067	5.71466e-159	565.741	34	19	35	1	0.0177617	0.0113296	0.0133298	0.00044482	0.0136956
Zotu1030	bellilinea caldifistulae ;k__bacteria;p__chloroflexi;c__anaerolineae;o__anaerolineales;f__anaerolineaceae;g__bellilinea;s__bellilinea caldifistulae;superkingdom__bacteria	88.3663	3.85391e-142	509.836	3	1	91	0	0.00156721	0.000596296	0.0346576	0	0.0122737
Zotu1303	bellilinea caldifistulae ;k__bacteria;p__chloroflexi;c__anaerolineae;o__anaerolineales;f__anaerolineaceae;g__bellilinea;s__bellilinea caldifistulae;superkingdom__bacteria	90.0744	1.53346e-153	547.707	21	6	61	1	0.0109705	0.00357777	0.023232	0.00044482	0.0121486
Zotu1072	bellilinea caldifistulae ;k__bacteria;p__chloroflexi;c__anaerolineae;o__anaerolineales;f__anaerolineaceae;g__bellilinea;s__bellilinea caldifistulae;superkingdom__bacteria	92.0596	2.12965e-164	583.774	6	1	84	0	0.00313442	0.000596296	0.0319916	0	0.0119074
Zotu1923	bellilinea caldifistulae ;k__bacteria;p__chloroflexi;c__anaerolineae;o__anaerolineales;f__anaerolineaceae;g__bellilinea;s__bellilinea caldifistulae;superkingdom__bacteria	90.6173	5.35229e-153	545.904	14	10	48	0	0.00731365	0.00596296	0.0182809	0	0.0105192
Zotu1369	bellilinea caldifistulae ;k__bacteria;p__chloroflexi;c__anaerolineae;o__anaerolineales;f__anaerolineaceae;g__bellilinea;s__bellilinea caldifistulae;superkingdom__bacteria	88.8889	3.16348e-143	514.345	0	1	81	1	0	0.000596296	0.030849	0.00044482	0.010037
Zotu1575	bellilinea caldifistulae ;k__bacteria;p__chloroflexi;c__anaerolineae;o__anaerolineales;f__anaerolineaceae;g__bellilinea;s__bellilinea caldifistulae;superkingdom__bacteria	85.25	7.44637e-126	455.735	14	6	50	0	0.00731365	0.00357777	0.0190426	0	0.00997801
Zotu1568	bellilinea caldifistulae ;k__bacteria;p__chloroflexi;c__anaerolineae;o__anaerolineales;f__anaerolineaceae;g__bellilinea;s__bellilinea caldifistulae;superkingdom__bacteria	89.8263	6.52042e-152	542.297	8	0	63	0	0.00417923	0	0.0239937	0	0.00939097
Zotu1497	bellilinea caldifistulae ;k__bacteria;p__chloroflexi;c__anaerolineae;o__anaerolineales;f__anaerolineaceae;g__bellilinea;s__bellilinea caldifistulae;superkingdom__bacteria	87.8109	3.60953e-136	489.999	9	0	64	1	0.00470163	0	0.0243745	0.00044482	0.00924724
Zotu1812	bellilinea caldifistulae ;k__bacteria;p__chloroflexi;c__anaerolineae;o__anaerolineales;f__anaerolineaceae;g__bellilinea;s__bellilinea caldifistulae;superkingdom__bacteria	90.0744	1.53346e-153	547.707	13	35	0	0	0.00679124	0.0208704	0	0	0.00922053
Zotu1122	bellilinea caldifistulae ;k__bacteria;p__chloroflexi;c__anaerolineae;o__anaerolineales;f__anaerolineaceae;g__bellilinea;s__bellilinea caldifistulae;superkingdom__bacteria	90.3226	1.25874e-154	552.215	14	19	30	2	0.00731365	0.0113296	0.0114256	0.00088964	0.0091333
Zotu1399	bellilinea caldifistulae ;k__bacteria;p__chloroflexi;c__anaerolineae;o__anaerolineales;f__anaerolineaceae;g__bellilinea;s__bellilinea caldifistulae;superkingdom__bacteria	92.3077	1.74813e-165	588.283	26	0	38	1	0.0135825	0	0.0144724	0.00044482	0.0089068
Zotu1332	bellilinea caldifistulae ;k__bacteria;p__chloroflexi;c__anaerolineae;o__anaerolineales;f__anaerolineaceae;g__bellilinea;s__bellilinea caldifistulae;superkingdom__bacteria	88.5856	2.13154e-145	520.657	14	3	50	2	0.00731365	0.00178889	0.0190426	0.00088964	0.00849208
Zotu1524	bellilinea caldifistulae ;k__bacteria;p__chloroflexi;c__anaerolineae;o__anaerolineales;f__anaerolineaceae;g__bellilinea;s__bellilinea caldifistulae;superkingdom__bacteria	90.8189	2.42993e-157	560.331	3	0	59	0	0.00156721	0	0.0224703	0	0.0080125
Zotu1646	bellilinea caldifistulae ;k__bacteria;p__chloroflexi;c__anaerolineae;o__anaerolineales;f__anaerolineaceae;g__bellilinea;s__bellilinea caldifistulae;superkingdom__bacteria	87.7805	6.98681e-139	499.016	28	0	22	0	0.0146273	0	0.00837875	0	0.00766868
Zotu1882	bellilinea caldifistulae ;k__bacteria;p__chloroflexi;c__anaerolineae;o__anaerolineales;f__anaerolineaceae;g__bellilinea;s__bellilinea caldifistulae;superkingdom__bacteria	90.8189	2.42993e-157	561.232	22	18	0	0	0.0114929	0.0107333	0	0	0.00740873
Zotu2552	bellilinea caldifistulae ;k__bacteria;p__chloroflexi;c__anaerolineae;o__anaerolineales;f__anaerolineaceae;g__bellilinea;s__bellilinea caldifistulae;superkingdom__bacteria	89.8765	1.17892e-148	532.378	15	25	0	1	0.00783605	0.0149074	0	0.00044482	0.00713633
Zotu1617	bellilinea caldifistulae ;k__bacteria;p__chloroflexi;c__anaerolineae;o__anaerolineales;f__anaerolineaceae;g__bellilinea;s__bellilinea caldifistulae;superkingdom__bacteria	86.8159	9.68571e-131	471.966	7	0	46	1	0.00365682	0	0.0175192	0.00044482	0.00661386
Zotu1757	bellilinea caldifistulae ;k__bacteria;p__chloroflexi;c__anaerolineae;o__anaerolineales;f__anaerolineaceae;g__bellilinea;s__bellilinea caldifistulae;superkingdom__bacteria	88.1481	3.85391e-142	509.836	10	1	46	3	0.00522403	0.000596296	0.0175192	0.00133446	0.00644538
Zotu1365	bellilinea caldifistulae ;k__bacteria;p__chloroflexi;c__anaerolineae;o__anaerolineales;f__anaerolineaceae;g__bellilinea;s__bellilinea caldifistulae;superkingdom__bacteria	91.8114	9.05552e-163	579.266	0	0	50	0	0	0	0.0190426	0	0.00634754
Zotu2350	bellilinea caldifistulae ;k__bacteria;p__chloroflexi;c__anaerolineae;o__anaerolineales;f__anaerolineaceae;g__bellilinea;s__bellilinea caldifistulae;superkingdom__bacteria	87.0647	2.27786e-132	477.376	14	3	23	0	0.00731365	0.00178889	0.0087596	0	0.00595405
Zotu1477	bellilinea caldifistulae ;k__bacteria;p__chloroflexi;c__anaerolineae;o__anaerolineales;f__anaerolineaceae;g__bellilinea;s__bellilinea caldifistulae;superkingdom__bacteria	90.5707	2.96027e-156	556.724	0	0	50	1	0	0	0.0190426	0.00044482	0.00590272
Zotu1847	bellilinea caldifistulae ;k__bacteria;p__chloroflexi;c__anaerolineae;o__anaerolineales;f__anaerolineaceae;g__bellilinea;s__bellilinea caldifistulae;superkingdom__bacteria	92.0596	2.12965e-164	583.774	3	27	0	0	0.00156721	0.0161	0	0	0.00588907
Zotu2629	bellilinea caldifistulae ;k__bacteria;p__chloroflexi;c__anaerolineae;o__anaerolineales;f__anaerolineaceae;g__bellilinea;s__bellilinea caldifistulae;superkingdom__bacteria	88.8889	3.16348e-143	514.345	10	19	0	0	0.00522403	0.0113296	0	0	0.00551788
Zotu1726	bellilinea caldifistulae ;k__bacteria;p__chloroflexi;c__anaerolineae;o__anaerolineales;f__anaerolineaceae;g__bellilinea;s__bellilinea caldifistulae;superkingdom__bacteria	89.5782	7.9435e-151	538.69	0	0	42	0	0	0	0.0159958	0	0.00533193
Zotu2257	bellilinea caldifistulae ;k__bacteria;p__chloroflexi;c__anaerolineae;o__anaerolineales;f__anaerolineaceae;g__bellilinea;s__bellilinea caldifistulae;superkingdom__bacteria	86.0697	6.11235e-127	459.342	9	0	29	0	0.00470163	0	0.0110447	0	0.00524878
Zotu2145	bellilinea caldifistulae ;k__bacteria;p__chloroflexi;c__anaerolineae;o__anaerolineales;f__anaerolineaceae;g__bellilinea;s__bellilinea caldifistulae;superkingdom__bacteria	88.5856	2.13154e-145	520.657	2	4	29	0	0.00104481	0.00238518	0.0110447	0	0.0048249
Zotu2284	bellilinea caldifistulae ;k__bacteria;p__chloroflexi;c__anaerolineae;o__anaerolineales;f__anaerolineaceae;g__bellilinea;s__bellilinea caldifistulae;superkingdom__bacteria	90.0744	1.53346e-153	547.707	1	23	0	0	0.000522403	0.0137148	0	0	0.00474574
Zotu1826	bellilinea caldifistulae ;k__bacteria;p__chloroflexi;c__anaerolineae;o__anaerolineales;f__anaerolineaceae;g__bellilinea;s__bellilinea caldifistulae;superkingdom__bacteria	90.2743	1.53346e-153	547.707	4	0	30	0	0.00208961	0	0.0114256	0	0.00450506
Zotu3148	bellilinea caldifistulae ;k__bacteria;p__chloroflexi;c__anaerolineae;o__anaerolineales;f__anaerolineaceae;g__bellilinea;s__bellilinea caldifistulae;superkingdom__bacteria	90.0744	1.53346e-153	547.707	20	5	0	0	0.0104481	0.00298148	0	0	0.00447651
Zotu2598	bellilinea caldifistulae ;k__bacteria;p__chloroflexi;c__anaerolineae;o__anaerolineales;f__anaerolineaceae;g__bellilinea;s__bellilinea caldifistulae;superkingdom__bacteria	89.8263	6.52042e-152	543.199	10	0	20	0	0.00522403	0	0.00761705	0	0.00428036
Zotu2028	bellilinea caldifistulae ;k__bacteria;p__chloroflexi;c__anaerolineae;o__anaerolineales;f__anaerolineaceae;g__bellilinea;s__bellilinea caldifistulae;superkingdom__bacteria	87.9012	8.4888e-138	496.311	8	0	21	0	0.00417923	0	0.0079979	0	0.00405904
Zotu2783	bellilinea caldifistulae ;k__bacteria;p__chloroflexi;c__anaerolineae;o__anaerolineales;f__anaerolineaceae;g__bellilinea;s__bellilinea caldifistulae;superkingdom__bacteria	89.8765	1.17892e-148	532.378	4	0	26	0	0.00208961	0	0.00990216	0	0.00399726
Zotu2682	bellilinea caldifistulae ;k__bacteria;p__chloroflexi;c__anaerolineae;o__anaerolineales;f__anaerolineaceae;g__bellilinea;s__bellilinea caldifistulae;superkingdom__bacteria	86.8486	1.25985e-135	489.098	3	14	2	0	0.00156721	0.00834814	0.000761705	0	0.00355902
Zotu3045	bellilinea caldifistulae ;k__bacteria;p__chloroflexi;c__anaerolineae;o__anaerolineales;f__anaerolineaceae;g__bellilinea;s__bellilinea caldifistulae;superkingdom__bacteria	84.5209	5.74019e-121	439.505	12	5	0	0	0.00626884	0.00298148	0	0	0.00308344
Zotu3166	bellilinea caldifistulae ;k__bacteria;p__chloroflexi;c__anaerolineae;o__anaerolineales;f__anaerolineaceae;g__bellilinea;s__bellilinea caldifistulae;superkingdom__bacteria	86.75	5.35702e-134	483.687	12	3	0	0	0.00626884	0.00178889	0	0	0.00268591
Zotu2822	bellilinea caldifistulae ;k__bacteria;p__chloroflexi;c__anaerolineae;o__anaerolineales;f__anaerolineaceae;g__bellilinea;s__bellilinea caldifistulae;superkingdom__bacteria	86.0349	1.17678e-129	468.359	8	6	0	0	0.00417923	0.00357777	0	0	0.00258567
Zotu2983	bellilinea caldifistulae ;k__bacteria;p__chloroflexi;c__anaerolineae;o__anaerolineales;f__anaerolineaceae;g__bellilinea;s__bellilinea caldifistulae;superkingdom__bacteria	86.2843	9.6596e-131	471.966	3	0	14	0	0.00156721	0	0.00533193	0	0.00229971
Zotu1762	bellilinea caldifistulae ;k__bacteria;p__chloroflexi;c__anaerolineae;o__anaerolineales;f__anaerolineaceae;g__bellilinea;s__bellilinea caldifistulae;superkingdom__bacteria	88.6139	9.06352e-144	515.246	2	0	22	19	0.00104481	0	0.00837875	0.00845158	-0.0053104
Zotu1377	bellilinea caldifistulae ;k__bacteria;p__chloroflexi;c__anaerolineae;o__anaerolineales;f__anaerolineaceae;g__bellilinea;s__bellilinea caldifistulae;superkingdom__bacteria	86.0697	6.11235e-127	459.342	0	0	0	89	0	0	0	0.039589	-0.039589
Zotu1104	bellilinea caldifistulae ;k__bacteria;p__chloroflexi;c__anaerolineae;o__anaerolineales;f__anaerolineaceae;g__bellilinea;s__bellilinea caldifistulae;superkingdom__bacteria	86.0697	6.11235e-127	459.342	0	1	0	118	0	0.000596296	0	0.0524888	-0.05229
Zotu604	bellilinea caldifistulae ;k__bacteria;p__chloroflexi;c__anaerolineae;o__anaerolineales;f__anaerolineaceae;g__bellilinea;s__bellilinea caldifistulae;superkingdom__bacteria	86.3184	5.01732e-128	462.949	17	4	2	233	0.00888086	0.00238518	0.000761705	0.103643	-0.0996338
Zotu242	bellilinea caldifistulae ;k__bacteria;p__chloroflexi;c__anaerolineae;o__anaerolineales;f__anaerolineaceae;g__bellilinea;s__bellilinea caldifistulae;superkingdom__bacteria	90.2985	4.39342e-154	550.412	3	0	2	578	0.00156721	0	0.000761705	0.257106	-0.25633
Zotu186	bellilinea caldifistulae ;k__bacteria;p__chloroflexi;c__anaerolineae;o__anaerolineales;f__anaerolineaceae;g__bellilinea;s__bellilinea caldifistulae;superkingdom__bacteria	88.8337	1.74967e-146	524.263	2	2	3	745	0.00104481	0.00119259	0.00114256	0.331391	-0.330264
Zotu849	bifissio spartinae ;k__bacteria;p__bacteroidetes;c__bacteroidetes;o__bacteroidetes;f__bacteroidetes;g__bifissio;s__bifissio spartinae;superkingdom__bacteria;superphylum__bacteroidetes/chlorobi group	86.7299	4.05128e-142	509.836	32	0	120	0	0.0167169	0	0.0457023	0	0.0208064
Zotu441	blastochloris sulfoviridis ;k__bacteria;p__proteobacteria;c__alphaproteobacteria;o__hyphomicrobiales;f__blastochloridaceae;g__blastochloris;s__blastochloris sulfoviridis;superkingdom__bacteria;	84.9624	3.84692e-123	446.718	47	11	196	2	0.024553	0.00655925	0.074647	0.00088964	0.0343634
Zotu2928	blastococcus jejuensis ;k__bacteria;p__actinobacteria;c__actinomycetia;o__geodermatophilales;f__geodermatophilaceae;g__blastococcus;s__blastococcus jejuensis;superkingdom__bacteria;	98.5258	0	708.207	0	17	0	0	0	0.010137	0	0	0.00337901
Zotu1089	blastopirellula cremea ;k__bacteria;p__planctomycetes;c__planctomycetia;o__pirellulales;f__pirellulaceae;g__blastopirellula;s__blastopirellula cremea; superkingdom__bacteria;	88.7531	1.19799e-148	532.378	16	2	91	0	0.00835845	0.00119259	0.0346576	0	0.0147362
Zotu3087	blastopirellula cremea ;k__bacteria;p__planctomycetes;c__planctomycetia;o__pirellulales;f__pirellulaceae;g__blastopirellula;s__blastopirellula cremea; superkingdom__bacteria;	76.1446	1.58451e-77	295.235	19	0	2	0	0.00992566	0	0.000761705	0	0.00356246
Zotu2970	blastopirellula marina ;k__bacteria;p__planctomycetes;c__planctomycetia;o__pirellulales;f__pirellulaceae;g__blastopirellula;s__blastopirellula marina; superkingdom__bacteria;	77.1845	1.06763e-79	302.449	21	3	2	0	0.0109705	0.00178889	0.000761705	0	0.00450702
Zotu2323	brassicibacter mesophilus ;k__bacteria;p__firmicutes;c__tissierellia;o__tissierellales;f__thermohalobacteraceae;g__brassicibacter;s__brassicibacter mesophilus; superkingdom__bacteria;	90.3941	4.41711e-154	549.51	8	24	0	0	0.00417923	0.0143111	0	0	0.00616344
Zotu2794	brevibacillus invocatus ;k__bacteria;p__firmicutes;c__bacilli;o__bacillales;f__paenibacillaceae;g__brevibacillus;s__brevibacillus invocatus;superkingdom__bacteria	100	0	771.325	7	29	0	0	0.00365682	0.0172926	0	0	0.00698313
Zotu1009	burkholderia diazotrophica ;k__bacteria;p__proteobacteria;c__betaproteobacteria;o__burkholderiales;f__burkholderiaceae;g__burkholderia;s__burkholderia diazotrophica;superkingdom__bacteria	90.6323	1.52778e-166	590.988	43	14	74	0	0.0224633	0.00834814	0.0281831	0	0.0196648
Zotu275	burkholderia phymatum ;k__bacteria;p__proteobacteria;c__betaproteobacteria;o__burkholderiales;f__burkholderiaceae;g__burkholderia;s__burkholderia phymatum;superkingdom__bacteria	90.8665	1.25408e-167	595.496	290	138	112	2	0.151497	0.0822888	0.0426555	0.00088964	0.0912574
Zotu726	burkholderia phymatum ;k__bacteria;p__proteobacteria;c__betaproteobacteria;o__burkholderiales;f__burkholderiaceae;g__burkholderia;s__burkholderia phymatum;superkingdom__bacteria	92.74	1.74165e-178	631.564	73	32	84	1	0.0381354	0.0190815	0.0319916	0.00044482	0.0292913
Zotu797	burkholderia phymatum ;k__bacteria;p__proteobacteria;c__betaproteobacteria;o__burkholderiales;f__burkholderiaceae;g__burkholderia;s__burkholderia phymatum;superkingdom__bacteria	92.74	1.74165e-178	630.662	76	38	59	1	0.0397026	0.0226592	0.0224703	0.00044482	0.0278326
Zotu684	burkholderia phymatum ;k__bacteria;p__proteobacteria;c__betaproteobacteria;o__burkholderiales;f__burkholderiaceae;g__burkholderia;s__burkholderia phymatum;superkingdom__bacteria	90.8665	1.25408e-167	594.595	43	21	128	2	0.0224633	0.0125222	0.0487491	0.00088964	0.0270219
Zotu947	burkholderia phymatum ;k__bacteria;p__proteobacteria;c__betaproteobacteria;o__burkholderiales;f__burkholderiaceae;g__burkholderia;s__burkholderia phymatum;superkingdom__bacteria	90.8665	1.25408e-167	594.595	19	15	101	1	0.00992566	0.00894444	0.0384661	0.00044482	0.0186672
Zotu983	burkholderia phymatum ;k__bacteria;p__proteobacteria;c__betaproteobacteria;o__burkholderiales;f__burkholderiaceae;g__burkholderia;s__burkholderia phymatum;superkingdom__bacteria	92.7739	6.07897e-178	628.859	96	5	0	1	0.0501507	0.00298148	0	0.00044482	0.0172659
Zotu1414	burkholderia phymatum ;k__bacteria;p__proteobacteria;c__betaproteobacteria;o__burkholderiales;f__burkholderiaceae;g__burkholderia;s__burkholderia phymatum;superkingdom__bacteria	91.5691	5.69349e-172	609.022	63	17	0	0	0.0329114	0.010137	0	0	0.0143495
Zotu1188	burkholderia phymatum ;k__bacteria;p__proteobacteria;c__betaproteobacteria;o__burkholderiales;f__burkholderiaceae;g__burkholderia;s__burkholderia phymatum;superkingdom__bacteria	92.7739	6.07897e-178	628.859	74	6	0	0	0.0386578	0.00357777	0	0	0.0140785
Zotu1522	burkholderia phymatum ;k__bacteria;p__proteobacteria;c__betaproteobacteria;o__burkholderiales;f__burkholderiaceae;g__burkholderia;s__burkholderia phymatum;superkingdom__bacteria	90.8665	1.25408e-167	594.595	40	23	0	0	0.0208961	0.0137148	0	0	0.011537
Zotu2472	burkholderia phymatum ;k__bacteria;p__proteobacteria;c__betaproteobacteria;o__burkholderiales;f__burkholderiaceae;g__burkholderia;s__burkholderia phymatum;superkingdom__bacteria	91.1007	2.9493e-169	600.005	37	0	1	0	0.0193289	0	0.000380852	0	0.00656992
Zotu534	burkholderia sabiae ;k__bacteria;p__proteobacteria;c__betaproteobacteria;o__burkholderiales;f__burkholderiaceae;g__burkholderia;s__burkholderia sabiae;superkingdom__bacteria	93.007	1.42964e-179	634.269	155	58	63	3	0.0809725	0.0345852	0.0239937	0.00133446	0.0451827
Zotu580	burkholderia sabiae ;k__bacteria;p__proteobacteria;c__betaproteobacteria;o__burkholderiales;f__burkholderiaceae;g__burkholderia;s__burkholderia sabiae;superkingdom__bacteria	91.3349	2.42094e-170	604.513	75	20	139	1	0.0391802	0.0119259	0.0529385	0.00044482	0.0342367
Zotu2521	burkholderia sabiae ;k__bacteria;p__proteobacteria;c__betaproteobacteria;o__burkholderiales;f__burkholderiaceae;g__burkholderia;s__burkholderia sabiae;superkingdom__bacteria	91.6084	1.98722e-171	607.218	0	0	1	19	0	0	0.000380852	0.00845158	-0.00832463
Zotu1268	burkholderia sabiae ;k__bacteria;p__proteobacteria;c__betaproteobacteria;o__burkholderiales;f__burkholderiaceae;g__burkholderia;s__burkholderia sabiae;superkingdom__bacteria	91.8415	1.63121e-172	611.727	8	0	0	134	0.00417923	0	0	0.0596059	-0.0582128
Zotu2418	burkholderia soli ;k__bacteria;p__proteobacteria;c__betaproteobacteria;o__burkholderiales;f__burkholderiaceae;g__burkholderia;s__burkholderia soli;superkingdom__bacteria	90.6542	6.49627e-165	585.578	0	0	35	0	0	0	0.0133298	0	0.00444328
Zotu1238	burkholderia sprentiae wsm5005 ;k__bacteria;p__proteobacteria;c__betaproteobacteria;o__burkholderiales;f__burkholderiaceae;g__burkholderia;s__burkholderia sprentiae;superkingdom__bacteria	91.6084	1.98722e-171	607.218	6	0	85	0	0.00313442	0	0.0323724	0	0.0118356
Zotu2460	byssovorax cruenta ;k__bacteria;p__proteobacteria;c__deltaproteobacteria;o__myxococcales;f__polyangiaceae;g__byssovorax;s__byssovorax cruenta;superkingdom__bacteria;subphylum__delta/epsilon subdivisions;suborder__sorangiineae	92.723	6.06358e-178	628.859	31	0	0	0	0.0161945	0	0	0	0.00539817
Zotu775	bythopirellula goksoyri ;k__bacteria;p__planctomycetes;c__planctomycetia;o__pirellulales;f__lacipirellulaceae;g__bythopirellula;s__bythopirellula goksoyri; superkingdom__bacteria;	89.0476	1.31641e-154	551.314	0	0	149	1	0	0	0.056747	0.00044482	0.0184708
Zotu1790	bythopirellula goksoyri ;k__bacteria;p__planctomycetes;c__planctomycetia;o__pirellulales;f__lacipirellulaceae;g__bythopirellula;s__bythopirellula goksoyri; superkingdom__bacteria;	77.8846	1.3887e-84	318.679	0	0	1	57	0	0	0.000380852	0.0253547	-0.0252278
Zotu2619	caldicoprobacter algeriensis ;k__bacteria;p__firmicutes;c__clostridia;o__eubacteriales;f__caldicoprobacteraceae;g__caldicoprobacter;s__caldicoprobacter algeriensis;superkingdom__bacteria;	86.3524	6.54377e-133	480.081	4	4	35	0	0.00208961	0.00238518	0.0133298	0	0.00593488
Zotu182	caldilinea aerophila dsm 14535 = nbrc 104270 ;k__bacteria;p__chloroflexi;c__caldilineae;o__caldilineales;f__caldilineaceae;g__caldilinea;s__caldilinea aerophila;superkingdom__bacteria	92.5558	4.1112e-167	592.791	471	130	63	10	0.246052	0.0775185	0.0239937	0.0044482	0.111406
Zotu195	caldilinea aerophila dsm 14535 = nbrc 104270 ;k__bacteria;p__chloroflexi;c__caldilineae;o__caldilineales;f__caldilineaceae;g__caldilinea;s__caldilinea aerophila;superkingdom__bacteria	92.5558	4.1112e-167	592.791	445	86	119	1	0.232469	0.0512814	0.0453214	0.00044482	0.109246
Zotu272	caldilinea aerophila dsm 14535 = nbrc 104270 ;k__bacteria;p__chloroflexi;c__caldilineae;o__caldilineales;f__caldilineaceae;g__caldilinea;s__caldilinea aerophila;superkingdom__bacteria	92.804	3.37468e-168	597.3	321	51	128	2	0.167691	0.0304111	0.0487491	0.00088964	0.0813942
Zotu573	caldilinea aerophila dsm 14535 = nbrc 104270 ;k__bacteria;p__chloroflexi;c__caldilineae;o__caldilineales;f__caldilineaceae;g__caldilinea;s__caldilinea aerophila;superkingdom__bacteria	92.5558	4.1112e-167	592.791	178	44	27	2	0.0929878	0.026237	0.010283	0.00088964	0.0422796
Zotu535	caldilinea aerophila dsm 14535 = nbrc 104270 ;k__bacteria;p__chloroflexi;c__caldilineae;o__caldilineales;f__caldilineaceae;g__caldilinea;s__caldilinea aerophila;superkingdom__bacteria	92.804	3.37468e-168	596.398	138	54	64	2	0.0720917	0.0322	0.0243745	0.00088964	0.0419991
Zotu584	caldilinea aerophila dsm 14535 = nbrc 104270 ;k__bacteria;p__chloroflexi;c__caldilineae;o__caldilineales;f__caldilineaceae;g__caldilinea;s__caldilinea aerophila;superkingdom__bacteria	86.7168	2.284e-132	478.277	121	19	100	3	0.0632108	0.0113296	0.0380852	0.00133446	0.0362074
Zotu530	caldilinea aerophila dsm 14535 = nbrc 104270 ;k__bacteria;p__chloroflexi;c__caldilineae;o__caldilineales;f__caldilineaceae;g__caldilinea;s__caldilinea aerophila;superkingdom__bacteria	83.871	2.43423e-119	434.095	79	21	115	0	0.0412699	0.0125222	0.043798	0	0.03253
Zotu708	caldilinea aerophila dsm 14535 = nbrc 104270 ;k__bacteria;p__chloroflexi;c__caldilineae;o__caldilineales;f__caldilineaceae;g__caldilinea;s__caldilinea aerophila;superkingdom__bacteria	92.3077	1.74813e-165	587.381	147	31	0	1	0.0767933	0.0184852	0	0.00044482	0.0313147
Zotu824	caldilinea aerophila dsm 14535 = nbrc 104270 ;k__bacteria;p__chloroflexi;c__caldilineae;o__caldilineales;f__caldilineaceae;g__caldilinea;s__caldilinea aerophila;superkingdom__bacteria	88.0893	1.10416e-142	511.64	127	25	25	0	0.0663452	0.0149074	0.00952131	0	0.030258
Zotu745	caldilinea aerophila dsm 14535 = nbrc 104270 ;k__bacteria;p__chloroflexi;c__caldilineae;o__caldilineales;f__caldilineaceae;g__caldilinea;s__caldilinea aerophila;superkingdom__bacteria	92.0596	2.12965e-164	583.774	98	53	5	0	0.0511955	0.0316037	0.00190426	0	0.0282345
Zotu658	caldilinea aerophila dsm 14535 = nbrc 104270 ;k__bacteria;p__chloroflexi;c__caldilineae;o__caldilineales;f__caldilineaceae;g__caldilinea;s__caldilinea aerophila;superkingdom__bacteria	84.1191	5.72476e-121	439.505	26	0	166	0	0.0135825	0	0.0632215	0	0.0256013
Zotu781	caldilinea aerophila dsm 14535 = nbrc 104270 ;k__bacteria;p__chloroflexi;c__caldilineae;o__caldilineales;f__caldilineaceae;g__caldilinea;s__caldilinea aerophila;superkingdom__bacteria	92.5558	4.1112e-167	592.791	40	3	127	0	0.0208961	0.00178889	0.0483682	0	0.0236844
Zotu766	caldilinea aerophila dsm 14535 = nbrc 104270 ;k__bacteria;p__chloroflexi;c__caldilineae;o__caldilineales;f__caldilineaceae;g__caldilinea;s__caldilinea aerophila;superkingdom__bacteria	91.3151	4.69088e-160	570.249	18	9	122	1	0.00940326	0.00536666	0.046464	0.00044482	0.0199665
Zotu1090	caldilinea aerophila dsm 14535 = nbrc 104270 ;k__bacteria;p__chloroflexi;c__caldilineae;o__caldilineales;f__caldilineaceae;g__caldilinea;s__caldilinea aerophila;superkingdom__bacteria	91.8114	9.05552e-163	579.266	51	55	1	1	0.0266426	0.0327963	0.000380852	0.00044482	0.0194951
Zotu988	caldilinea aerophila dsm 14535 = nbrc 104270 ;k__bacteria;p__chloroflexi;c__caldilineae;o__caldilineales;f__caldilineaceae;g__caldilinea;s__caldilinea aerophila;superkingdom__bacteria	93.0521	7.93648e-170	601.808	77	26	0	0	0.0402251	0.0155037	0	0	0.0185762
Zotu956	caldilinea aerophila dsm 14535 = nbrc 104270 ;k__bacteria;p__chloroflexi;c__caldilineae;o__caldilineales;f__caldilineaceae;g__caldilinea;s__caldilinea aerophila;superkingdom__bacteria	83.3747	1.26096e-116	425.078	50	5	68	0	0.0261202	0.00298148	0.025898	0	0.0183332
Zotu906	caldilinea aerophila dsm 14535 = nbrc 104270 ;k__bacteria;p__chloroflexi;c__caldilineae;o__caldilineales;f__caldilineaceae;g__caldilinea;s__caldilinea aerophila;superkingdom__bacteria	92.804	3.37468e-168	596.398	27	0	101	1	0.0141049	0	0.0384661	0.00044482	0.0170788
Zotu1082	caldilinea aerophila dsm 14535 = nbrc 104270 ;k__bacteria;p__chloroflexi;c__caldilineae;o__caldilineales;f__caldilineaceae;g__caldilinea;s__caldilinea aerophila;superkingdom__bacteria	92.5558	4.1112e-167	592.791	58	34	0	0	0.0302994	0.0202741	0	0	0.0168578
Zotu913	caldilinea aerophila dsm 14535 = nbrc 104270 ;k__bacteria;p__chloroflexi;c__caldilineae;o__caldilineales;f__caldilineaceae;g__caldilinea;s__caldilinea aerophila;superkingdom__bacteria	84.1191	5.72476e-121	439.505	43	0	68	0	0.0224633	0	0.025898	0	0.0161204
Zotu1069	caldilinea aerophila dsm 14535 = nbrc 104270 ;k__bacteria;p__chloroflexi;c__caldilineae;o__caldilineales;f__caldilineaceae;g__caldilinea;s__caldilinea aerophila;superkingdom__bacteria	87.3762	8.51168e-138	496.311	88	3	0	0	0.0459715	0.00178889	0	0	0.0159201
Zotu922	caldilinea aerophila dsm 14535 = nbrc 104270 ;k__bacteria;p__chloroflexi;c__caldilineae;o__caldilineales;f__caldilineaceae;g__caldilinea;s__caldilinea aerophila;superkingdom__bacteria	83.3747	1.26096e-116	425.078	33	0	78	0	0.0172393	0	0.0297065	0	0.0156486
Zotu1111	caldilinea aerophila dsm 14535 = nbrc 104270 ;k__bacteria;p__chloroflexi;c__caldilineae;o__caldilineales;f__caldilineaceae;g__caldilinea;s__caldilinea aerophila;superkingdom__bacteria	92.3077	1.74813e-165	588.283	34	38	0	0	0.0177617	0.0226592	0	0	0.0134737
Zotu1159	caldilinea aerophila dsm 14535 = nbrc 104270 ;k__bacteria;p__chloroflexi;c__caldilineae;o__caldilineales;f__caldilineaceae;g__caldilinea;s__caldilinea aerophila;superkingdom__bacteria	85.213	3.17481e-124	450.325	39	30	0	0	0.0203737	0.0178889	0	0	0.0127542
Zotu1041	caldilinea aerophila dsm 14535 = nbrc 104270 ;k__bacteria;p__chloroflexi;c__caldilineae;o__caldilineales;f__caldilineaceae;g__caldilinea;s__caldilinea aerophila;superkingdom__bacteria	92.804	3.37468e-168	597.3	6	2	89	1	0.00313442	0.00119259	0.0338959	0.00044482	0.0122961
Zotu984	caldilinea aerophila dsm 14535 = nbrc 104270 ;k__bacteria;p__chloroflexi;c__caldilineae;o__caldilineales;f__caldilineaceae;g__caldilinea;s__caldilinea aerophila;superkingdom__bacteria	88.8614	6.12341e-146	522.46	0	0	96	0	0	0	0.0365618	0	0.0121873
Zotu1049	caldilinea aerophila dsm 14535 = nbrc 104270 ;k__bacteria;p__chloroflexi;c__caldilineae;o__caldilineales;f__caldilineaceae;g__caldilinea;s__caldilinea aerophila;superkingdom__bacteria	92.5558	4.1112e-167	592.791	7	5	84	3	0.00365682	0.00298148	0.0319916	0.00133446	0.0115422
Zotu1728	caldilinea aerophila dsm 14535 = nbrc 104270 ;k__bacteria;p__chloroflexi;c__caldilineae;o__caldilineales;f__caldilineaceae;g__caldilinea;s__caldilinea aerophila;superkingdom__bacteria	91.5633	1.10319e-161	574.758	59	6	0	0	0.0308218	0.00357777	0	0	0.0114665
Zotu2238	caldilinea aerophila dsm 14535 = nbrc 104270 ;k__bacteria;p__chloroflexi;c__caldilineae;o__caldilineales;f__caldilineaceae;g__caldilinea;s__caldilinea aerophila;superkingdom__bacteria	92.804	3.37468e-168	597.3	40	10	1	0	0.0208961	0.00596296	0.000380852	0	0.00907998
Zotu1942	caldilinea aerophila dsm 14535 = nbrc 104270 ;k__bacteria;p__chloroflexi;c__caldilineae;o__caldilineales;f__caldilineaceae;g__caldilinea;s__caldilinea aerophila;superkingdom__bacteria	87.8412	4.69502e-141	507.131	0	42	0	0	0	0.0250444	0	0	0.00834814
Zotu1676	caldilinea aerophila dsm 14535 = nbrc 104270 ;k__bacteria;p__chloroflexi;c__caldilineae;o__caldilineales;f__caldilineaceae;g__caldilinea;s__caldilinea aerophila;superkingdom__bacteria	86.9674	5.37145e-134	482.786	25	19	0	0	0.0130601	0.0113296	0	0	0.0081299
Zotu2590	caldilinea aerophila dsm 14535 = nbrc 104270 ;k__bacteria;p__chloroflexi;c__caldilineae;o__caldilineales;f__caldilineaceae;g__caldilinea;s__caldilinea aerophila;superkingdom__bacteria	87.7193	8.51168e-138	496.311	10	29	0	0	0.00522403	0.0172926	0	0	0.00750554
Zotu2408	caldilinea aerophila dsm 14535 = nbrc 104270 ;k__bacteria;p__chloroflexi;c__caldilineae;o__caldilineales;f__caldilineaceae;g__caldilinea;s__caldilinea aerophila;superkingdom__bacteria	88.0893	1.10416e-142	511.64	31	10	1	1	0.0161945	0.00596296	0.000380852	0.00044482	0.00706795
Zotu2234	caldilinea aerophila dsm 14535 = nbrc 104270 ;k__bacteria;p__chloroflexi;c__caldilineae;o__caldilineales;f__caldilineaceae;g__caldilinea;s__caldilinea aerophila;superkingdom__bacteria	85.5721	1.75594e-127	461.145	13	20	0	0	0.00679124	0.0119259	0	0	0.00623905
Zotu2012	caldilinea aerophila dsm 14535 = nbrc 104270 ;k__bacteria;p__chloroflexi;c__caldilineae;o__caldilineales;f__caldilineaceae;g__caldilinea;s__caldilinea aerophila;superkingdom__bacteria	87.1287	1.03693e-136	491.803	3	0	44	0	0.00156721	0	0.0167575	0	0.00610824
Zotu1910	caldilinea aerophila dsm 14535 = nbrc 104270 ;k__bacteria;p__chloroflexi;c__caldilineae;o__caldilineales;f__caldilineaceae;g__caldilinea;s__caldilinea aerophila;superkingdom__bacteria	91.3151	4.69088e-160	570.249	0	0	47	0	0	0	0.0179001	0	0.00596669
Zotu2859	caldilinea aerophila dsm 14535 = nbrc 104270 ;k__bacteria;p__chloroflexi;c__caldilineae;o__caldilineales;f__caldilineaceae;g__caldilinea;s__caldilinea aerophila;superkingdom__bacteria	85.9649	1.44136e-128	464.752	12	1	28	0	0.00626884	0.000596296	0.0106639	0	0.005843
Zotu2168	caldilinea aerophila dsm 14535 = nbrc 104270 ;k__bacteria;p__chloroflexi;c__caldilineae;o__caldilineales;f__caldilineaceae;g__caldilinea;s__caldilinea aerophila;superkingdom__bacteria	93.3002	6.51466e-171	605.415	33	0	0	0	0.0172393	0	0	0	0.00574644
Zotu2727	caldilinea aerophila dsm 14535 = nbrc 104270 ;k__bacteria;p__chloroflexi;c__caldilineae;o__caldilineales;f__caldilineaceae;g__caldilinea;s__caldilinea aerophila;superkingdom__bacteria	93.3002	6.51466e-171	606.317	33	0	0	0	0.0172393	0	0	0	0.00574644
Zotu2214	caldilinea aerophila dsm 14535 = nbrc 104270 ;k__bacteria;p__chloroflexi;c__caldilineae;o__caldilineales;f__caldilineaceae;g__caldilinea;s__caldilinea aerophila;superkingdom__bacteria	84.3672	4.69917e-122	443.112	13	11	9	0	0.00679124	0.00655925	0.00342767	0	0.00559272
Zotu2082	caldilinea aerophila dsm 14535 = nbrc 104270 ;k__bacteria;p__chloroflexi;c__caldilineae;o__caldilineales;f__caldilineaceae;g__caldilinea;s__caldilinea aerophila;superkingdom__bacteria	87.4687	1.03693e-136	491.803	9	20	0	0	0.00470163	0.0119259	0	0	0.00554252
Zotu2955	caldilinea aerophila dsm 14535 = nbrc 104270 ;k__bacteria;p__chloroflexi;c__caldilineae;o__caldilineales;f__caldilineaceae;g__caldilinea;s__caldilinea aerophila;superkingdom__bacteria	87.3762	8.51168e-138	495.409	9	19	0	0	0.00470163	0.0113296	0	0	0.00534375
Zotu2709	caldilinea aerophila dsm 14535 = nbrc 104270 ;k__bacteria;p__chloroflexi;c__caldilineae;o__caldilineales;f__caldilineaceae;g__caldilinea;s__caldilinea aerophila;superkingdom__bacteria	92.5558	4.1112e-167	592.791	17	9	0	0	0.00888086	0.00536666	0	0	0.00474917
Zotu2641	caldilinea aerophila dsm 14535 = nbrc 104270 ;k__bacteria;p__chloroflexi;c__caldilineae;o__caldilineales;f__caldilineaceae;g__caldilinea;s__caldilinea aerophila;superkingdom__bacteria	91.5633	1.10319e-161	574.758	23	0	1	0	0.0120153	0	0.000380852	0	0.00413204
Zotu2240	caldilinea aerophila dsm 14535 = nbrc 104270 ;k__bacteria;p__chloroflexi;c__caldilineae;o__caldilineales;f__caldilineaceae;g__caldilinea;s__caldilinea aerophila;superkingdom__bacteria	92.0596	2.12965e-164	583.774	0	1	25	0	0	0.000596296	0.00952131	0	0.00337253
Zotu2847	caldilinea aerophila dsm 14535 = nbrc 104270 ;k__bacteria;p__chloroflexi;c__caldilineae;o__caldilineales;f__caldilineaceae;g__caldilinea;s__caldilinea aerophila;superkingdom__bacteria	92.804	3.37468e-168	596.398	18	0	1	0	0.00940326	0	0.000380852	0	0.00326137
Zotu2754	caldilinea aerophila dsm 14535 = nbrc 104270 ;k__bacteria;p__chloroflexi;c__caldilineae;o__caldilineales;f__caldilineaceae;g__caldilinea;s__caldilinea aerophila;superkingdom__bacteria	93.7965	1.25763e-173	615.333	18	0	0	0	0.00940326	0	0	0	0.00313442
Zotu2729	caldilinea aerophila dsm 14535 = nbrc 104270 ;k__bacteria;p__chloroflexi;c__caldilineae;o__caldilineales;f__caldilineaceae;g__caldilinea;s__caldilinea aerophila;superkingdom__bacteria	92.5558	4.1112e-167	592.791	10	6	0	0	0.00522403	0.00357777	0	0	0.00293394
Zotu2925	caldilinea aerophila dsm 14535 = nbrc 104270 ;k__bacteria;p__chloroflexi;c__caldilineae;o__caldilineales;f__caldilineaceae;g__caldilinea;s__caldilinea aerophila;superkingdom__bacteria	92.804	3.37468e-168	596.398	16	0	0	0	0.00835845	0	0	0	0.00278615
Zotu3156	caldilinea aerophila dsm 14535 = nbrc 104270 ;k__bacteria;p__chloroflexi;c__caldilineae;o__caldilineales;f__caldilineaceae;g__caldilinea;s__caldilinea aerophila;superkingdom__bacteria	92.804	3.37468e-168	597.3	9	5	0	0	0.00470163	0.00298148	0	0	0.00256104
Zotu3090	caldilinea aerophila dsm 14535 = nbrc 104270 ;k__bacteria;p__chloroflexi;c__caldilineae;o__caldilineales;f__caldilineaceae;g__caldilinea;s__caldilinea aerophila;superkingdom__bacteria	86.7168	2.284e-132	477.376	13	0	0	0	0.00679124	0	0	0	0.00226375
Zotu3082	caldilinea aerophila dsm 14535 = nbrc 104270 ;k__bacteria;p__chloroflexi;c__caldilineae;o__caldilineales;f__caldilineaceae;g__caldilinea;s__caldilinea aerophila;superkingdom__bacteria	86.2155	1.18314e-129	468.359	12	0	0	0	0.00626884	0	0	0	0.00208961
Zotu3128	caldilinea aerophila dsm 14535 = nbrc 104270 ;k__bacteria;p__chloroflexi;c__caldilineae;o__caldilineales;f__caldilineaceae;g__caldilinea;s__caldilinea aerophila;superkingdom__bacteria	85.4637	7.46644e-126	455.735	10	0	0	0	0.00522403	0	0	0	0.00174134
Zotu156	caldilinea aerophila dsm 14535 = nbrc 104270 ;k__bacteria;p__chloroflexi;c__caldilineae;o__caldilineales;f__caldilineaceae;g__caldilinea;s__caldilinea aerophila;superkingdom__bacteria	92.3077	1.74813e-165	588.283	203	124	56	498	0.106048	0.0739407	0.0213277	0.22152	-0.154415
Zotu825	caldilinea tarbellica ;k__bacteria;p__chloroflexi;c__caldilineae;o__caldilineales;f__caldilineaceae;g__caldilinea;s__caldilinea tarbellica;superkingdom__bacteria	85.7855	5.03085e-128	462.949	90	50	1	1	0.0470163	0.0298148	0.000380852	0.00044482	0.0252925
Zotu713	caldilinea tarbellica ;k__bacteria;p__chloroflexi;c__caldilineae;o__caldilineales;f__caldilineaceae;g__caldilinea;s__caldilinea tarbellica;superkingdom__bacteria	85.7855	9.07153e-125	452.129	8	0	187	1	0.00417923	0	0.0712194	0.00044482	0.024688
Zotu1350	caldilinea tarbellica ;k__bacteria;p__chloroflexi;c__caldilineae;o__caldilineales;f__caldilineaceae;g__caldilinea;s__caldilinea tarbellica;superkingdom__bacteria	88.0597	1.03136e-136	491.803	28	29	27	0	0.0146273	0.0172926	0.010283	0	0.0140676
Zotu1028	caldilinea tarbellica ;k__bacteria;p__chloroflexi;c__caldilineae;o__caldilineales;f__caldilineaceae;g__caldilinea;s__caldilinea tarbellica;superkingdom__bacteria	91.5633	1.10319e-161	574.758	0	0	98	0	0	0	0.0373235	0	0.0124412
Zotu2893	caldilinea tarbellica ;k__bacteria;p__chloroflexi;c__caldilineae;o__caldilineales;f__caldilineaceae;g__caldilinea;s__caldilinea tarbellica;superkingdom__bacteria	87.5931	5.71971e-140	502.623	23	30	0	0	0.0120153	0.0178889	0	0	0.00996805
Zotu1652	caldilinea tarbellica ;k__bacteria;p__chloroflexi;c__caldilineae;o__caldilineales;f__caldilineaceae;g__caldilinea;s__caldilinea tarbellica;superkingdom__bacteria	91.8114	9.05552e-163	578.364	30	14	0	0	0.0156721	0.00834814	0	0	0.00800675
Zotu1849	caldilinea tarbellica ;k__bacteria;p__chloroflexi;c__caldilineae;o__caldilineales;f__caldilineaceae;g__caldilinea;s__caldilinea tarbellica;superkingdom__bacteria	84.4444	1.64017e-121	442.21	0	0	55	1	0	0	0.0209469	0.00044482	0.00653747
Zotu1955	caldilinea tarbellica ;k__bacteria;p__chloroflexi;c__caldilineae;o__caldilineales;f__caldilineaceae;g__caldilinea;s__caldilinea tarbellica;superkingdom__bacteria	82.8784	6.53195e-114	416.963	2	0	48	0	0.00104481	0	0.0182809	0	0.00644191
Zotu2035	caldilinea tarbellica ;k__bacteria;p__chloroflexi;c__caldilineae;o__caldilineales;f__caldilineaceae;g__caldilinea;s__caldilinea tarbellica;superkingdom__bacteria	87.3449	2.43208e-138	498.114	33	3	0	0	0.0172393	0.00178889	0	0	0.00634273
Zotu2891	caldilinea tarbellica ;k__bacteria;p__chloroflexi;c__caldilineae;o__caldilineales;f__caldilineaceae;g__caldilinea;s__caldilinea tarbellica;superkingdom__bacteria	88.8614	1.10416e-142	511.64	21	10	1	0	0.0109705	0.00596296	0.000380852	0	0.00577143
Zotu2799	caldilinea tarbellica ;k__bacteria;p__chloroflexi;c__caldilineae;o__caldilineales;f__caldilineaceae;g__caldilinea;s__caldilinea tarbellica;superkingdom__bacteria	86.9674	5.37145e-134	482.786	29	0	0	1	0.0151497	0	0	0.00044482	0.00460508
Zotu2343	caldilinea tarbellica ;k__bacteria;p__chloroflexi;c__caldilineae;o__caldilineales;f__caldilineaceae;g__caldilinea;s__caldilinea tarbellica;superkingdom__bacteria	85.8209	1.44136e-128	464.752	25	1	0	0	0.0130601	0.000596296	0	0	0.00455213
Zotu2602	caldilinea tarbellica ;k__bacteria;p__chloroflexi;c__caldilineae;o__caldilineales;f__caldilineaceae;g__caldilinea;s__caldilinea tarbellica;superkingdom__bacteria	85.5362	6.12883e-127	459.342	13	6	0	0	0.00679124	0.00357777	0	0	0.00345634
Zotu2916	caldilinea tarbellica ;k__bacteria;p__chloroflexi;c__caldilineae;o__caldilineales;f__caldilineaceae;g__caldilinea;s__caldilinea tarbellica;superkingdom__bacteria	82.8283	1.17782e-110	405.241	5	9	0	0	0.00261202	0.00536666	0	0	0.00265956
Zotu3047	caldilinea tarbellica ;k__bacteria;p__chloroflexi;c__caldilineae;o__caldilineales;f__caldilineaceae;g__caldilinea;s__caldilinea tarbellica;superkingdom__bacteria	86.8159	4.39731e-135	487.294	15	0	0	0	0.00783605	0	0	0	0.00261202
Zotu1051	calditerricola yamamurae ;k__bacteria;p__firmicutes;c__bacilli;o__bacillales;f__bacillaceae;g__calditerricola;s__calditerricola yamamurae;superkingdom__bacteria	83.6105	2.59826e-119	434.997	6	0	91	0	0.00313442	0	0.0346576	0	0.0125973
Zotu1507	calditerricola yamamurae ;k__bacteria;p__firmicutes;c__bacilli;o__bacillales;f__bacillaceae;g__calditerricola;s__calditerricola yamamurae;superkingdom__bacteria	79.3427	6.9254e-95	352.943	0	0	60	0	0	0	0.0228511	0	0.00761705
Zotu2941	calditerricola yamamurae ;k__bacteria;p__firmicutes;c__bacilli;o__bacillales;f__bacillaceae;g__calditerricola;s__calditerricola yamamurae;superkingdom__bacteria	79.3427	6.9254e-95	352.943	0	0	12	0	0	0	0.00457023	0	0.00152341
Zotu2364	caloramator australicus ;k__bacteria;p__firmicutes;c__clostridia;o__eubacteriales;f__clostridiaceae;g__caloramator;s__caloramator australicus;superkingdom__bacteria;	95.0249	3.83674e-180	636.072	12	29	0	0	0.00626884	0.0172926	0	0	0.00785381
Zotu3177	caloramator australicus ;k__bacteria;p__firmicutes;c__clostridia;o__eubacteriales;f__clostridiaceae;g__caloramator;s__caloramator australicus;superkingdom__bacteria;	81.2346	2.43638e-100	370.977	10	0	0	0	0.00522403	0	0	0	0.00174134
Zotu1588	caloramator proteoclasticus ;k__bacteria;p__firmicutes;c__clostridia;o__eubacteriales;f__clostridiaceae;g__caloramator;s__caloramator proteoclasticus;superkingdom__bacteria;	95.2736	0	639.679	9	47	1	0	0.00470163	0.0280259	0.000380852	0	0.0110361
Zotu1619	caloramator proteoclasticus ;k__bacteria;p__firmicutes;c__clostridia;o__eubacteriales;f__clostridiaceae;g__caloramator;s__caloramator proteoclasticus;superkingdom__bacteria;	95.2736	0	639.679	5	39	0	0	0.00261202	0.0232555	0	0	0.00862252
Zotu2102	caloramator proteoclasticus ;k__bacteria;p__firmicutes;c__clostridia;o__eubacteriales;f__clostridiaceae;g__caloramator;s__caloramator proteoclasticus;superkingdom__bacteria;	94.5679	1.64465e-178	630.662	15	25	0	0	0.00783605	0.0149074	0	0	0.00758115
Zotu2560	caloramator proteoclasticus ;k__bacteria;p__firmicutes;c__clostridia;o__eubacteriales;f__clostridiaceae;g__caloramator;s__caloramator proteoclasticus;superkingdom__bacteria;	95.0249	3.83674e-180	636.072	3	15	0	0	0.00156721	0.00894444	0	0	0.00350388
Zotu3013	caloramator proteoclasticus ;k__bacteria;p__firmicutes;c__clostridia;o__eubacteriales;f__clostridiaceae;g__caloramator;s__caloramator proteoclasticus;superkingdom__bacteria;	95.2736	0	640.581	0	15	0	0	0	0.00894444	0	0	0.00298148
Zotu87	caloramator quimbayensis ;k__bacteria;p__firmicutes;c__clostridia;o__eubacteriales;f__clostridiaceae;g__caloramator;s__caloramator quimbayensis;superkingdom__bacteria;	96.7662	0	666.729	333	762	41	9	0.17396	0.454377	0.0156149	0.00400338	0.210647
Zotu1800	caloramator quimbayensis ;k__bacteria;p__firmicutes;c__clostridia;o__eubacteriales;f__clostridiaceae;g__caloramator;s__caloramator quimbayensis;superkingdom__bacteria;	95.0249	3.83674e-180	636.072	4	36	0	0	0.00208961	0.0214666	0	0	0.00785209
Zotu1068	candidatus acetothermus autotrophicum ;k__bacteria;p__acetothermia;c__acetothermia;o__acetothermia;f__acetothermia;g__candidatus acetothermum;s__candidatus acetothermus autotrophicum;superkingdom__bacteria	80.9412	1.53183e-109	402.536	3	0	107	0	0.00156721	0	0.0407512	0	0.0141061
Zotu247	candidatus anammoximicrobium moscowii ;k__bacteria;p__planctomycetes;c__planctomycetia;o__pirellulales;f__pirellulaceae;g__candidatus anammoximicrobium;s__candidatus anammoximicrobium moscowii; superkingdom__bacteria;	91.2736	1.02159e-168	599.103	132	81	286	2	0.0689572	0.0483	0.108924	0.00088964	0.074504
Zotu297	candidatus anammoximicrobium moscowii ;k__bacteria;p__planctomycetes;c__planctomycetia;o__pirellulales;f__pirellulaceae;g__candidatus anammoximicrobium;s__candidatus anammoximicrobium moscowii; superkingdom__bacteria;	90.8019	5.29197e-166	590.086	27	34	416	1	0.0141049	0.0202741	0.158435	0.00044482	0.0638263
Zotu396	candidatus anammoximicrobium moscowii ;k__bacteria;p__planctomycetes;c__planctomycetia;o__pirellulales;f__pirellulaceae;g__candidatus anammoximicrobium;s__candidatus anammoximicrobium moscowii; superkingdom__bacteria;	91.0377	1.24455e-167	594.595	281	25	66	1	0.146795	0.0149074	0.0251362	0.00044482	0.0618348
Zotu360	candidatus anammoximicrobium moscowii ;k__bacteria;p__planctomycetes;c__planctomycetia;o__pirellulales;f__pirellulaceae;g__candidatus anammoximicrobium;s__candidatus anammoximicrobium moscowii; superkingdom__bacteria;	97.6415	0	720.83	73	29	324	1	0.0381354	0.0172926	0.123396	0.00044482	0.0591632
Zotu333	candidatus anammoximicrobium moscowii ;k__bacteria;p__planctomycetes;c__planctomycetia;o__pirellulales;f__pirellulaceae;g__candidatus anammoximicrobium;s__candidatus anammoximicrobium moscowii; superkingdom__bacteria;	90.0943	3.33959e-162	576.561	53	3	336	0	0.0276874	0.00178889	0.127966	0	0.0524809
Zotu533	candidatus anammoximicrobium moscowii ;k__bacteria;p__planctomycetes;c__planctomycetia;o__pirellulales;f__pirellulaceae;g__candidatus anammoximicrobium;s__candidatus anammoximicrobium moscowii; superkingdom__bacteria;	98.8208	0	742.471	52	0	238	3	0.027165	0	0.0906428	0.00133446	0.0379348
Zotu531	candidatus anammoximicrobium moscowii ;k__bacteria;p__planctomycetes;c__planctomycetia;o__pirellulales;f__pirellulaceae;g__candidatus anammoximicrobium;s__candidatus anammoximicrobium moscowii; superkingdom__bacteria;	88.2075	2.40467e-151	540.494	6	0	278	0	0.00313442	0	0.105877	0	0.0363371
Zotu482	candidatus anammoximicrobium moscowii ;k__bacteria;p__planctomycetes;c__planctomycetia;o__pirellulales;f__pirellulaceae;g__candidatus anammoximicrobium;s__candidatus anammoximicrobium moscowii; superkingdom__bacteria;	91.2941	3.57479e-168	597.3	2	1	275	0	0.00104481	0.000596296	0.104734	0	0.0354585
Zotu656	candidatus anammoximicrobium moscowii ;k__bacteria;p__planctomycetes;c__planctomycetia;o__pirellulales;f__pirellulaceae;g__candidatus anammoximicrobium;s__candidatus anammoximicrobium moscowii; superkingdom__bacteria;	90.566	6.44693e-165	585.578	40	41	115	0	0.0208961	0.0244481	0.043798	0	0.0297141
Zotu556	candidatus anammoximicrobium moscowii ;k__bacteria;p__planctomycetes;c__planctomycetia;o__pirellulales;f__pirellulaceae;g__candidatus anammoximicrobium;s__candidatus anammoximicrobium moscowii; superkingdom__bacteria;	91.7453	1.97213e-171	607.218	35	10	162	0	0.0182841	0.00596296	0.0616981	0	0.0286484
Zotu582	candidatus anammoximicrobium moscowii ;k__bacteria;p__planctomycetes;c__planctomycetia;o__pirellulales;f__pirellulaceae;g__candidatus anammoximicrobium;s__candidatus anammoximicrobium moscowii; superkingdom__bacteria;	91.2736	1.02159e-168	599.103	1	0	216	1	0.000522403	0	0.0822641	0.00044482	0.0271507
Zotu643	candidatus anammoximicrobium moscowii ;k__bacteria;p__planctomycetes;c__planctomycetia;o__pirellulales;f__pirellulaceae;g__candidatus anammoximicrobium;s__candidatus anammoximicrobium moscowii; superkingdom__bacteria;	91.9811	4.63801e-173	612.628	63	8	107	1	0.0329114	0.00477037	0.0407512	0.00044482	0.0256995
Zotu974	candidatus anammoximicrobium moscowii ;k__bacteria;p__planctomycetes;c__planctomycetia;o__pirellulales;f__pirellulaceae;g__candidatus anammoximicrobium;s__candidatus anammoximicrobium moscowii; superkingdom__bacteria;	90.566	6.44693e-165	585.578	123	12	1	0	0.0642556	0.00715555	0.000380852	0	0.0239307
Zotu858	candidatus anammoximicrobium moscowii ;k__bacteria;p__planctomycetes;c__planctomycetia;o__pirellulales;f__pirellulaceae;g__candidatus anammoximicrobium;s__candidatus anammoximicrobium moscowii; superkingdom__bacteria;	90.566	6.44693e-165	585.578	80	20	31	1	0.0417923	0.0119259	0.0118064	0.00044482	0.0213967
Zotu1214	candidatus anammoximicrobium moscowii ;k__bacteria;p__planctomycetes;c__planctomycetia;o__pirellulales;f__pirellulaceae;g__candidatus anammoximicrobium;s__candidatus anammoximicrobium moscowii; superkingdom__bacteria;	88.7059	1.97387e-152	544.1	90	21	0	0	0.0470163	0.0125222	0	0	0.0198462
Zotu904	candidatus anammoximicrobium moscowii ;k__bacteria;p__planctomycetes;c__planctomycetia;o__pirellulales;f__pirellulaceae;g__candidatus anammoximicrobium;s__candidatus anammoximicrobium moscowii; superkingdom__bacteria;	94.8113	0	666.729	10	0	129	0	0.00522403	0	0.0491299	0	0.018118
Zotu847	candidatus anammoximicrobium moscowii ;k__bacteria;p__planctomycetes;c__planctomycetia;o__pirellulales;f__pirellulaceae;g__candidatus anammoximicrobium;s__candidatus anammoximicrobium moscowii; superkingdom__bacteria;	89.8585	1.42003e-160	571.151	72	10	28	0	0.037613	0.00596296	0.0106639	0	0.01808
Zotu946	candidatus anammoximicrobium moscowii ;k__bacteria;p__planctomycetes;c__planctomycetia;o__pirellulales;f__pirellulaceae;g__candidatus anammoximicrobium;s__candidatus anammoximicrobium moscowii; superkingdom__bacteria;	90.3302	2.74131e-163	580.168	31	2	92	0	0.0161945	0.00119259	0.0350384	0	0.0174752
Zotu1108	candidatus anammoximicrobium moscowii ;k__bacteria;p__planctomycetes;c__planctomycetia;o__pirellulales;f__pirellulaceae;g__candidatus anammoximicrobium;s__candidatus anammoximicrobium moscowii; superkingdom__bacteria;	88.8889	1.97387e-152	545.002	25	5	89	0	0.0130601	0.00298148	0.0338959	0	0.0166458
Zotu980	candidatus anammoximicrobium moscowii ;k__bacteria;p__planctomycetes;c__planctomycetia;o__pirellulales;f__pirellulaceae;g__candidatus anammoximicrobium;s__candidatus anammoximicrobium moscowii; superkingdom__bacteria;	98.5849	0	738.864	81	6	1	0	0.0423147	0.00357777	0.000380852	0	0.0154244
Zotu1363	candidatus anammoximicrobium moscowii ;k__bacteria;p__planctomycetes;c__planctomycetia;o__pirellulales;f__pirellulaceae;g__candidatus anammoximicrobium;s__candidatus anammoximicrobium moscowii; superkingdom__bacteria;	99.2925	0	752.389	34	4	67	0	0.0177617	0.00238518	0.0255171	0	0.0152213
Zotu1145	candidatus anammoximicrobium moscowii ;k__bacteria;p__planctomycetes;c__planctomycetia;o__pirellulales;f__pirellulaceae;g__candidatus anammoximicrobium;s__candidatus anammoximicrobium moscowii; superkingdom__bacteria;	86.1111	1.44667e-141	508.033	3	0	109	0	0.00156721	0	0.0415129	0	0.01436
Zotu1063	candidatus anammoximicrobium moscowii ;k__bacteria;p__planctomycetes;c__planctomycetia;o__pirellulales;f__pirellulaceae;g__candidatus anammoximicrobium;s__candidatus anammoximicrobium moscowii; superkingdom__bacteria;	98.5849	0	738.864	48	1	44	1	0.0250754	0.000596296	0.0167575	0.00044482	0.0136982
Zotu1603	candidatus anammoximicrobium moscowii ;k__bacteria;p__planctomycetes;c__planctomycetia;o__pirellulales;f__pirellulaceae;g__candidatus anammoximicrobium;s__candidatus anammoximicrobium moscowii; superkingdom__bacteria;	95.5189	0	679.353	22	10	61	0	0.0114929	0.00596296	0.023232	0	0.0135626
Zotu1447	candidatus anammoximicrobium moscowii ;k__bacteria;p__planctomycetes;c__planctomycetia;o__pirellulales;f__pirellulaceae;g__candidatus anammoximicrobium;s__candidatus anammoximicrobium moscowii; superkingdom__bacteria;	87.5	5.29664e-147	526.968	30	15	42	1	0.0156721	0.00894444	0.0159958	0.00044482	0.0130926
Zotu1253	candidatus anammoximicrobium moscowii ;k__bacteria;p__planctomycetes;c__planctomycetia;o__pirellulales;f__pirellulaceae;g__candidatus anammoximicrobium;s__candidatus anammoximicrobium moscowii; superkingdom__bacteria;	91.9811	4.63801e-173	612.628	12	0	86	0	0.00626884	0	0.0327533	0	0.0130074
Zotu1457	candidatus anammoximicrobium moscowii ;k__bacteria;p__planctomycetes;c__planctomycetia;o__pirellulales;f__pirellulaceae;g__candidatus anammoximicrobium;s__candidatus anammoximicrobium moscowii; superkingdom__bacteria;	90.3529	1.16563e-161	575.659	51	10	16	0	0.0266426	0.00596296	0.00609364	0	0.0128997
Zotu1392	candidatus anammoximicrobium moscowii ;k__bacteria;p__planctomycetes;c__planctomycetia;o__pirellulales;f__pirellulaceae;g__candidatus anammoximicrobium;s__candidatus anammoximicrobium moscowii; superkingdom__bacteria;	87.4126	3.63258e-149	533.28	14	0	83	1	0.00731365	0	0.0316107	0.00044482	0.01253
Zotu2938	candidatus anammoximicrobium moscowii ;k__bacteria;p__planctomycetes;c__planctomycetia;o__pirellulales;f__pirellulaceae;g__candidatus anammoximicrobium;s__candidatus anammoximicrobium moscowii; superkingdom__bacteria;	89.8585	1.42003e-160	571.151	71	0	0	0	0.0370906	0	0	0	0.0123635
Zotu1127	candidatus anammoximicrobium moscowii ;k__bacteria;p__planctomycetes;c__planctomycetia;o__pirellulales;f__pirellulaceae;g__candidatus anammoximicrobium;s__candidatus anammoximicrobium moscowii; superkingdom__bacteria;	90.0943	3.33959e-162	576.561	14	0	72	0	0.00731365	0	0.0274214	0	0.0115783
Zotu1463	candidatus anammoximicrobium moscowii ;k__bacteria;p__planctomycetes;c__planctomycetia;o__pirellulales;f__pirellulaceae;g__candidatus anammoximicrobium;s__candidatus anammoximicrobium moscowii; superkingdom__bacteria;	98.5849	0	738.864	29	7	38	0	0.0151497	0.00417407	0.0144724	0	0.0112654
Zotu1384	candidatus anammoximicrobium moscowii ;k__bacteria;p__planctomycetes;c__planctomycetia;o__pirellulales;f__pirellulaceae;g__candidatus anammoximicrobium;s__candidatus anammoximicrobium moscowii; superkingdom__bacteria;	96.934	0	707.305	28	34	0	1	0.0146273	0.0202741	0	0.00044482	0.011189
Zotu1269	candidatus anammoximicrobium moscowii ;k__bacteria;p__planctomycetes;c__planctomycetia;o__pirellulales;f__pirellulaceae;g__candidatus anammoximicrobium;s__candidatus anammoximicrobium moscowii; superkingdom__bacteria;	87.0283	2.74373e-144	517.951	7	0	74	0	0.00365682	0	0.0281831	0	0.0106133
Zotu1341	candidatus anammoximicrobium moscowii ;k__bacteria;p__planctomycetes;c__planctomycetia;o__pirellulales;f__pirellulaceae;g__candidatus anammoximicrobium;s__candidatus anammoximicrobium moscowii; superkingdom__bacteria;	91.5094	2.40255e-170	603.611	12	1	65	0	0.00626884	0.000596296	0.0247554	0	0.0105402
Zotu1659	candidatus anammoximicrobium moscowii ;k__bacteria;p__planctomycetes;c__planctomycetia;o__pirellulales;f__pirellulaceae;g__candidatus anammoximicrobium;s__candidatus anammoximicrobium moscowii; superkingdom__bacteria;	90.0943	3.33959e-162	576.561	14	8	49	0	0.00731365	0.00477037	0.0186618	0	0.0102486
Zotu1278	candidatus anammoximicrobium moscowii ;k__bacteria;p__planctomycetes;c__planctomycetia;o__pirellulales;f__pirellulaceae;g__candidatus anammoximicrobium;s__candidatus anammoximicrobium moscowii; superkingdom__bacteria;	87.4408	6.45263e-146	523.362	1	0	79	0	0.000522403	0	0.0300873	0	0.0102032
Zotu1922	candidatus anammoximicrobium moscowii ;k__bacteria;p__planctomycetes;c__planctomycetia;o__pirellulales;f__pirellulaceae;g__candidatus anammoximicrobium;s__candidatus anammoximicrobium moscowii; superkingdom__bacteria;	91.9811	4.63801e-173	612.628	17	0	48	0	0.00888086	0	0.0182809	0	0.00905392
Zotu1576	candidatus anammoximicrobium moscowii ;k__bacteria;p__planctomycetes;c__planctomycetia;o__pirellulales;f__pirellulaceae;g__candidatus anammoximicrobium;s__candidatus anammoximicrobium moscowii; superkingdom__bacteria;	89.6226	1.72995e-159	567.544	45	4	1	0	0.0235081	0.00238518	0.000380852	0	0.00875806
Zotu1335	candidatus anammoximicrobium moscowii ;k__bacteria;p__planctomycetes;c__planctomycetia;o__pirellulales;f__pirellulaceae;g__candidatus anammoximicrobium;s__candidatus anammoximicrobium moscowii; superkingdom__bacteria;	89.0995	1.09172e-155	554.921	13	8	38	0	0.00679124	0.00477037	0.0144724	0	0.008678
Zotu1965	candidatus anammoximicrobium moscowii ;k__bacteria;p__planctomycetes;c__planctomycetia;o__pirellulales;f__pirellulaceae;g__candidatus anammoximicrobium;s__candidatus anammoximicrobium moscowii; superkingdom__bacteria;	91.0377	1.24455e-167	594.595	25	21	1	0	0.0130601	0.0125222	0.000380852	0	0.00865438
Zotu1684	candidatus anammoximicrobium moscowii ;k__bacteria;p__planctomycetes;c__planctomycetia;o__pirellulales;f__pirellulaceae;g__candidatus anammoximicrobium;s__candidatus anammoximicrobium moscowii; superkingdom__bacteria;	90.5882	2.74131e-163	580.168	14	0	48	0	0.00731365	0	0.0182809	0	0.00853152
Zotu1768	candidatus anammoximicrobium moscowii ;k__bacteria;p__planctomycetes;c__planctomycetia;o__pirellulales;f__pirellulaceae;g__candidatus anammoximicrobium;s__candidatus anammoximicrobium moscowii; superkingdom__bacteria;	96.4623	0	698.288	16	0	45	0	0.00835845	0	0.0171384	0	0.00849893
Zotu2776	candidatus anammoximicrobium moscowii ;k__bacteria;p__planctomycetes;c__planctomycetia;o__pirellulales;f__pirellulaceae;g__candidatus anammoximicrobium;s__candidatus anammoximicrobium moscowii; superkingdom__bacteria;	99.0566	0	747.881	41	0	4	0	0.0214185	0	0.00152341	0	0.00764731
Zotu2126	candidatus anammoximicrobium moscowii ;k__bacteria;p__planctomycetes;c__planctomycetia;o__pirellulales;f__pirellulaceae;g__candidatus anammoximicrobium;s__candidatus anammoximicrobium moscowii; superkingdom__bacteria;	98.8208	0	742.471	23	9	13	0	0.0120153	0.00536666	0.00495108	0	0.00744434
Zotu1975	candidatus anammoximicrobium moscowii ;k__bacteria;p__planctomycetes;c__planctomycetia;o__pirellulales;f__pirellulaceae;g__candidatus anammoximicrobium;s__candidatus anammoximicrobium moscowii; superkingdom__bacteria;	89.3868	7.35595e-158	563.036	7	0	48	0	0.00365682	0	0.0182809	0	0.00731258
Zotu2218	candidatus anammoximicrobium moscowii ;k__bacteria;p__planctomycetes;c__planctomycetia;o__pirellulales;f__pirellulaceae;g__candidatus anammoximicrobium;s__candidatus anammoximicrobium moscowii; superkingdom__bacteria;	96.4623	0	697.387	0	1	54	0	0	0.000596296	0.020566	0	0.00705411
Zotu2405	candidatus anammoximicrobium moscowii ;k__bacteria;p__planctomycetes;c__planctomycetia;o__pirellulales;f__pirellulaceae;g__candidatus anammoximicrobium;s__candidatus anammoximicrobium moscowii; superkingdom__bacteria;	90.3302	2.74131e-163	581.069	36	0	4	0	0.0188065	0	0.00152341	0	0.00677664
Zotu1976	candidatus anammoximicrobium moscowii ;k__bacteria;p__planctomycetes;c__planctomycetia;o__pirellulales;f__pirellulaceae;g__candidatus anammoximicrobium;s__candidatus anammoximicrobium moscowii; superkingdom__bacteria;	88.2075	2.40467e-151	540.494	3	0	48	0	0.00156721	0	0.0182809	0	0.00661604
Zotu2614	candidatus anammoximicrobium moscowii ;k__bacteria;p__planctomycetes;c__planctomycetia;o__pirellulales;f__pirellulaceae;g__candidatus anammoximicrobium;s__candidatus anammoximicrobium moscowii; superkingdom__bacteria;	90.3302	2.74131e-163	581.069	25	10	1	0	0.0130601	0.00596296	0.000380852	0	0.00646796
Zotu2009	candidatus anammoximicrobium moscowii ;k__bacteria;p__planctomycetes;c__planctomycetia;o__pirellulales;f__pirellulaceae;g__candidatus anammoximicrobium;s__candidatus anammoximicrobium moscowii; superkingdom__bacteria;	89.6226	1.72995e-159	567.544	12	21	0	0	0.00626884	0.0125222	0	0	0.00626368
Zotu2031	candidatus anammoximicrobium moscowii ;k__bacteria;p__planctomycetes;c__planctomycetia;o__pirellulales;f__pirellulaceae;g__candidatus anammoximicrobium;s__candidatus anammoximicrobium moscowii; superkingdom__bacteria;	95.283	0	675.746	9	1	34	0	0.00470163	0.000596296	0.012949	0	0.0060823
Zotu1946	candidatus anammoximicrobium moscowii ;k__bacteria;p__planctomycetes;c__planctomycetia;o__pirellulales;f__pirellulaceae;g__candidatus anammoximicrobium;s__candidatus anammoximicrobium moscowii; superkingdom__bacteria;	94.8113	0	666.729	21	1	21	1	0.0109705	0.000596296	0.0079979	0.00044482	0.00607673
Zotu2056	candidatus anammoximicrobium moscowii ;k__bacteria;p__planctomycetes;c__planctomycetia;o__pirellulales;f__pirellulaceae;g__candidatus anammoximicrobium;s__candidatus anammoximicrobium moscowii; superkingdom__bacteria;	89.3868	8.93852e-157	559.429	9	0	34	0	0.00470163	0	0.012949	0	0.00588354
Zotu2152	candidatus anammoximicrobium moscowii ;k__bacteria;p__planctomycetes;c__planctomycetia;o__pirellulales;f__pirellulaceae;g__candidatus anammoximicrobium;s__candidatus anammoximicrobium moscowii; superkingdom__bacteria;	87.007	1.54461e-147	527.87	11	0	31	0	0.00574644	0	0.0118064	0	0.00585095
Zotu2936	candidatus anammoximicrobium moscowii ;k__bacteria;p__planctomycetes;c__planctomycetia;o__pirellulales;f__pirellulaceae;g__candidatus anammoximicrobium;s__candidatus anammoximicrobium moscowii; superkingdom__bacteria;	98.5849	0	738.864	28	0	4	0	0.0146273	0	0.00152341	0	0.00538357
Zotu2942	candidatus anammoximicrobium moscowii ;k__bacteria;p__planctomycetes;c__planctomycetia;o__pirellulales;f__pirellulaceae;g__candidatus anammoximicrobium;s__candidatus anammoximicrobium moscowii; superkingdom__bacteria;	98.3491	0	733.454	27	2	1	0	0.0141049	0.00119259	0.000380852	0	0.00522611
Zotu1909	candidatus anammoximicrobium moscowii ;k__bacteria;p__planctomycetes;c__planctomycetia;o__pirellulales;f__pirellulaceae;g__candidatus anammoximicrobium;s__candidatus anammoximicrobium moscowii; superkingdom__bacteria;	89.1509	1.08893e-155	554.921	0	0	41	0	0	0	0.0156149	0	0.00520498
Zotu2513	candidatus anammoximicrobium moscowii ;k__bacteria;p__planctomycetes;c__planctomycetia;o__pirellulales;f__pirellulaceae;g__candidatus anammoximicrobium;s__candidatus anammoximicrobium moscowii; superkingdom__bacteria;	89.8345	7.35595e-158	563.036	12	11	1	0	0.00626884	0.00655925	0.000380852	0	0.00440298
Zotu3035	candidatus anammoximicrobium moscowii ;k__bacteria;p__planctomycetes;c__planctomycetia;o__pirellulales;f__pirellulaceae;g__candidatus anammoximicrobium;s__candidatus anammoximicrobium moscowii; superkingdom__bacteria;	87.5	5.29664e-147	526.968	16	10	0	1	0.00835845	0.00596296	0	0.00044482	0.00432898
Zotu2205	candidatus anammoximicrobium moscowii ;k__bacteria;p__planctomycetes;c__planctomycetia;o__pirellulales;f__pirellulaceae;g__candidatus anammoximicrobium;s__candidatus anammoximicrobium moscowii; superkingdom__bacteria;	98.3491	0	733.454	0	0	33	0	0	0	0.0125681	0	0.00418937
Zotu3091	candidatus anammoximicrobium moscowii ;k__bacteria;p__planctomycetes;c__planctomycetia;o__pirellulales;f__pirellulaceae;g__candidatus anammoximicrobium;s__candidatus anammoximicrobium moscowii; superkingdom__bacteria;	92.2353	1.57753e-172	610.825	24	0	0	0	0.0125377	0	0	0	0.00417923
Zotu2558	candidatus anammoximicrobium moscowii ;k__bacteria;p__planctomycetes;c__planctomycetia;o__pirellulales;f__pirellulaceae;g__candidatus anammoximicrobium;s__candidatus anammoximicrobium moscowii; superkingdom__bacteria;	91.2736	1.02159e-168	599.103	1	0	29	0	0.000522403	0	0.0110447	0	0.00385571
Zotu3185	candidatus anammoximicrobium moscowii ;k__bacteria;p__planctomycetes;c__planctomycetia;o__pirellulales;f__pirellulaceae;g__candidatus anammoximicrobium;s__candidatus anammoximicrobium moscowii; superkingdom__bacteria;	88.4434	1.97387e-152	545.002	5	0	22	0	0.00261202	0	0.00837875	0	0.00366359
Zotu2574	candidatus anammoximicrobium moscowii ;k__bacteria;p__planctomycetes;c__planctomycetia;o__pirellulales;f__pirellulaceae;g__candidatus anammoximicrobium;s__candidatus anammoximicrobium moscowii; superkingdom__bacteria;	96.6981	0	702.797	6	12	0	0	0.00313442	0.00715555	0	0	0.00342999
Zotu2577	candidatus anammoximicrobium moscowii ;k__bacteria;p__planctomycetes;c__planctomycetia;o__pirellulales;f__pirellulaceae;g__candidatus anammoximicrobium;s__candidatus anammoximicrobium moscowii; superkingdom__bacteria;	90.0943	3.33959e-162	576.561	19	0	0	0	0.00992566	0	0	0	0.00330855
Zotu2949	candidatus anammoximicrobium moscowii ;k__bacteria;p__planctomycetes;c__planctomycetia;o__pirellulales;f__pirellulaceae;g__candidatus anammoximicrobium;s__candidatus anammoximicrobium moscowii; superkingdom__bacteria;	87.5	5.29664e-147	526.067	19	0	0	0	0.00992566	0	0	0	0.00330855
Zotu3043	candidatus anammoximicrobium moscowii ;k__bacteria;p__planctomycetes;c__planctomycetia;o__pirellulales;f__pirellulaceae;g__candidatus anammoximicrobium;s__candidatus anammoximicrobium moscowii; superkingdom__bacteria;	88.9151	3.81047e-155	554.019	19	0	0	0	0.00992566	0	0	0	0.00330855
Zotu2773	candidatus anammoximicrobium moscowii ;k__bacteria;p__planctomycetes;c__planctomycetia;o__pirellulales;f__pirellulaceae;g__candidatus anammoximicrobium;s__candidatus anammoximicrobium moscowii; superkingdom__bacteria;	88	4.34775e-148	530.575	1	0	23	0	0.000522403	0	0.0087596	0	0.003094
Zotu2755	candidatus anammoximicrobium moscowii ;k__bacteria;p__planctomycetes;c__planctomycetia;o__pirellulales;f__pirellulaceae;g__candidatus anammoximicrobium;s__candidatus anammoximicrobium moscowii; superkingdom__bacteria;	91.0377	1.24455e-167	594.595	15	0	0	0	0.00783605	0	0	0	0.00261202
Zotu3122	candidatus anammoximicrobium moscowii ;k__bacteria;p__planctomycetes;c__planctomycetia;o__pirellulales;f__pirellulaceae;g__candidatus anammoximicrobium;s__candidatus anammoximicrobium moscowii; superkingdom__bacteria;	90.0943	3.33959e-162	576.561	10	4	0	0	0.00522403	0.00238518	0	0	0.00253641
Zotu2712	candidatus anammoximicrobium moscowii ;k__bacteria;p__planctomycetes;c__planctomycetia;o__pirellulales;f__pirellulaceae;g__candidatus anammoximicrobium;s__candidatus anammoximicrobium moscowii; superkingdom__bacteria;	94.5755	0	662.221	1	0	17	0	0.000522403	0	0.00647449	0	0.0023323
Zotu3074	candidatus anammoximicrobium moscowii ;k__bacteria;p__planctomycetes;c__planctomycetia;o__pirellulales;f__pirellulaceae;g__candidatus anammoximicrobium;s__candidatus anammoximicrobium moscowii; superkingdom__bacteria;	87.2642	6.45263e-146	522.46	0	11	1	0	0	0.00655925	0.000380852	0	0.00231337
Zotu2888	candidatus anammoximicrobium moscowii ;k__bacteria;p__planctomycetes;c__planctomycetia;o__pirellulales;f__pirellulaceae;g__candidatus anammoximicrobium;s__candidatus anammoximicrobium moscowii; superkingdom__bacteria;	90.8019	5.29197e-166	589.185	12	0	0	0	0.00626884	0	0	0	0.00208961
Zotu545	candidatus anammoximicrobium moscowii ;k__bacteria;p__planctomycetes;c__planctomycetia;o__pirellulales;f__pirellulaceae;g__candidatus anammoximicrobium;s__candidatus anammoximicrobium moscowii; superkingdom__bacteria;	89.1765	3.81047e-155	553.117	2	0	1	239	0.00104481	0	0.000380852	0.106312	-0.105837
Zotu125	candidatus anammoximicrobium moscowii ;k__bacteria;p__planctomycetes;c__planctomycetia;o__pirellulales;f__pirellulaceae;g__candidatus anammoximicrobium;s__candidatus anammoximicrobium moscowii; superkingdom__bacteria;	90.8019	5.29197e-166	589.185	309	121	11	709	0.161423	0.0721518	0.00418937	0.315377	-0.236123
Zotu222	candidatus anammoximicrobium moscowii ;k__bacteria;p__planctomycetes;c__planctomycetia;o__pirellulales;f__pirellulaceae;g__candidatus anammoximicrobium;s__candidatus anammoximicrobium moscowii; superkingdom__bacteria;	88.4434	1.97387e-152	545.002	7	1	2	686	0.00365682	0.000596296	0.000761705	0.305147	-0.303475
Zotu1336	candidatus brocadia caroliniensis ;k__bacteria;p__planctomycetes;c__candidatus brocadiia;o__candidatus brocadiales;f__candidatus brocadiaceae;g__candidatus brocadia;s__candidatus brocadia caroliniensis; superkingdom__bacteria;	80.2326	4.93152e-103	379.994	63	0	0	0	0.0329114	0	0	0	0.0109705
Zotu1852	candidatus brocadia caroliniensis ;k__bacteria;p__planctomycetes;c__candidatus brocadiia;o__candidatus brocadiales;f__candidatus brocadiaceae;g__candidatus brocadia;s__candidatus brocadia caroliniensis; superkingdom__bacteria;	78.8863	2.42335e-94	352.042	34	6	1	0	0.0177617	0.00357777	0.000380852	0	0.00724011
Zotu1994	candidatus brocadia caroliniensis ;k__bacteria;p__planctomycetes;c__candidatus brocadiia;o__candidatus brocadiales;f__candidatus brocadiaceae;g__candidatus brocadia;s__candidatus brocadia caroliniensis; superkingdom__bacteria;	82.4356	1.10481e-117	429.586	0	0	37	0	0	0	0.0140915	0	0.00469718
Zotu2915	candidatus brocadia caroliniensis ;k__bacteria;p__planctomycetes;c__candidatus brocadiia;o__candidatus brocadiales;f__candidatus brocadiaceae;g__candidatus brocadia;s__candidatus brocadia caroliniensis; superkingdom__bacteria;	78.8863	2.42335e-94	351.14	20	0	0	0	0.0104481	0	0	0	0.00348269
Zotu3178	candidatus brocadia caroliniensis ;k__bacteria;p__planctomycetes;c__candidatus brocadiia;o__candidatus brocadiales;f__candidatus brocadiaceae;g__candidatus brocadia;s__candidatus brocadia caroliniensis; superkingdom__bacteria;	82.093	6.84886e-114	416.061	0	0	14	0	0	0	0.00533193	0	0.00177731
Zotu1985	candidatus brocadia fulgida ;k__bacteria;p__planctomycetes;c__candidatus brocadiia;o__candidatus brocadiales;f__candidatus brocadiaceae;g__candidatus brocadia;s__candidatus brocadia fulgida; superkingdom__bacteria;	81.1189	6.46404e-108	396.224	41	1	0	0	0.0214185	0.000596296	0	0	0.00733828
Zotu2374	candidatus clostridium anorexicamassiliense ap5 ;k__bacteria;p__firmicutes;c__clostridia;o__eubacteriales;f__clostridiaceae;g__clostridium;s__candidatus clostridium anorexicamassiliense;superkingdom__bacteria;	98.01	0	690.173	7	32	0	1	0.00365682	0.0190815	0	0.00044482	0.00713461
Zotu2241	candidatus clostridium anorexicamassiliense ap5 ;k__bacteria;p__firmicutes;c__clostridia;o__eubacteriales;f__clostridiaceae;g__clostridium;s__candidatus clostridium anorexicamassiliense;superkingdom__bacteria;	100	0	726.241	2	26	0	0	0.00104481	0.0155037	0	0	0.00551617
Zotu538	candidatus desulforudis audaxviator mp104c ;k__bacteria;p__firmicutes;c__clostridia;o__eubacteriales;f__peptococcaceae;g__candidatus desulforudis;s__candidatus desulforudis audaxviator;superkingdom__bacteria;	82.3113	6.97211e-114	416.061	31	0	223	0	0.0161945	0	0.0849301	0	0.0337082
Zotu662	candidatus desulforudis audaxviator mp104c ;k__bacteria;p__firmicutes;c__clostridia;o__eubacteriales;f__peptococcaceae;g__candidatus desulforudis;s__candidatus desulforudis audaxviator;superkingdom__bacteria;	85.0117	4.38489e-129	466.555	8	58	137	1	0.00417923	0.0345852	0.0521768	0.00044482	0.0298689
Zotu985	candidatus desulforudis audaxviator mp104c ;k__bacteria;p__firmicutes;c__clostridia;o__eubacteriales;f__peptococcaceae;g__candidatus desulforudis;s__candidatus desulforudis audaxviator;superkingdom__bacteria;	82.1429	5.72305e-115	419.668	10	3	121	0	0.00522403	0.00178889	0.0460831	0	0.0176987
Zotu1221	candidatus desulforudis audaxviator mp104c ;k__bacteria;p__firmicutes;c__clostridia;o__eubacteriales;f__peptococcaceae;g__candidatus desulforudis;s__candidatus desulforudis audaxviator;superkingdom__bacteria;	82.1853	2.4335e-113	415.159	12	0	78	0	0.00626884	0	0.0297065	0	0.0119918
Zotu1767	candidatus desulforudis audaxviator mp104c ;k__bacteria;p__firmicutes;c__clostridia;o__eubacteriales;f__peptococcaceae;g__candidatus desulforudis;s__candidatus desulforudis audaxviator;superkingdom__bacteria;	81.3953	2.1871e-107	395.322	24	0	44	0	0.0125377	0	0.0167575	0	0.00976506
Zotu1513	candidatus desulforudis audaxviator mp104c ;k__bacteria;p__firmicutes;c__clostridia;o__eubacteriales;f__peptococcaceae;g__candidatus desulforudis;s__candidatus desulforudis audaxviator;superkingdom__bacteria;	81.4286	5.36015e-109	399.831	50	1	0	0	0.0261202	0.000596296	0	0	0.00890549
Zotu1683	candidatus desulforudis audaxviator mp104c ;k__bacteria;p__firmicutes;c__clostridia;o__eubacteriales;f__peptococcaceae;g__candidatus desulforudis;s__candidatus desulforudis audaxviator;superkingdom__bacteria;	83.8028	1.17663e-123	449.423	32	5	0	0	0.0167169	0.00298148	0	0	0.00656613
Zotu1718	candidatus desulforudis audaxviator mp104c ;k__bacteria;p__firmicutes;c__clostridia;o__eubacteriales;f__peptococcaceae;g__candidatus desulforudis;s__candidatus desulforudis audaxviator;superkingdom__bacteria;	82.1853	2.4335e-113	415.159	24	12	0	0	0.0125377	0.00715555	0	0	0.00656441
Zotu2486	candidatus desulforudis audaxviator mp104c ;k__bacteria;p__firmicutes;c__clostridia;o__eubacteriales;f__peptococcaceae;g__candidatus desulforudis;s__candidatus desulforudis audaxviator;superkingdom__bacteria;	80.9412	2.76961e-106	391.716	0	0	29	0	0	0	0.0110447	0	0.00368157
Zotu2616	candidatus desulforudis audaxviator mp104c ;k__bacteria;p__firmicutes;c__clostridia;o__eubacteriales;f__peptococcaceae;g__candidatus desulforudis;s__candidatus desulforudis audaxviator;superkingdom__bacteria;	83.1354	9.06883e-119	433.193	17	1	0	0	0.00888086	0.000596296	0	0	0.00315905
Zotu1042	candidatus desulforudis audaxviator mp104c ;k__bacteria;p__firmicutes;c__clostridia;o__eubacteriales;f__peptococcaceae;g__candidatus desulforudis;s__candidatus desulforudis audaxviator;superkingdom__bacteria;	83.0986	7.42535e-120	435.898	1	0	1	115	0.000522403	0	0.000380852	0.0511543	-0.0508532
Zotu253	candidatus desulforudis audaxviator mp104c ;k__bacteria;p__firmicutes;c__clostridia;o__eubacteriales;f__peptococcaceae;g__candidatus desulforudis;s__candidatus desulforudis audaxviator;superkingdom__bacteria;	83.3333	6.0951e-121	440.407	4	17	51	512	0.00208961	0.010137	0.0194235	0.227748	-0.217198
Zotu1370	candidatus kuenenia stuttgartiensis ;k__bacteria;p__planctomycetes;c__candidatus brocadiia;o__candidatus brocadiales;f__candidatus brocadiaceae;g__candidatus kuenenia;s__candidatus kuenenia stuttgartiensis; superkingdom__bacteria;	79.669	9.05392e-100	369.174	42	22	0	0	0.0219409	0.0131185	0	0	0.0116865
Zotu1511	candidatus kuenenia stuttgartiensis ;k__bacteria;p__planctomycetes;c__candidatus brocadiia;o__candidatus brocadiales;f__candidatus brocadiaceae;g__candidatus kuenenia;s__candidatus kuenenia stuttgartiensis; superkingdom__bacteria;	81.4988	2.93467e-112	410.651	8	0	54	0	0.00417923	0	0.020566	0	0.00824842
Zotu3110	candidatus kuenenia stuttgartiensis ;k__bacteria;p__planctomycetes;c__candidatus brocadiia;o__candidatus brocadiales;f__candidatus brocadiaceae;g__candidatus kuenenia;s__candidatus kuenenia stuttgartiensis; superkingdom__bacteria;	85.9485	3.14656e-137	493.606	0	0	25	0	0	0	0.00952131	0	0.00317377
Zotu2280	candidatus kuenenia stuttgartiensis ;k__bacteria;p__planctomycetes;c__candidatus brocadiia;o__candidatus brocadiales;f__candidatus brocadiaceae;g__candidatus kuenenia;s__candidatus kuenenia stuttgartiensis; superkingdom__bacteria;	82.1346	2.41507e-113	414.258	0	0	24	0	0	0	0.00914045	0	0.00304682
Zotu2900	candidatus kuenenia stuttgartiensis ;k__bacteria;p__planctomycetes;c__candidatus brocadiia;o__candidatus brocadiales;f__candidatus brocadiaceae;g__candidatus kuenenia;s__candidatus kuenenia stuttgartiensis; superkingdom__bacteria;	78.972	1.63284e-96	358.353	14	0	0	0	0.00731365	0	0	0	0.00243788
Zotu3025	candidatus kuenenia stuttgartiensis ;k__bacteria;p__planctomycetes;c__candidatus brocadiia;o__candidatus brocadiales;f__candidatus brocadiaceae;g__candidatus kuenenia;s__candidatus kuenenia stuttgartiensis; superkingdom__bacteria;	81.2646	1.24785e-110	406.143	0	0	15	0	0	0	0.00571278	0	0.00190426
Zotu657	candidatus magnetananas tsingtaoensis ;k__bacteria;p__proteobacteria;c__deltaproteobacteria;o__desulfobacterales;f__desulfobacteraceae;g__candidatus magnetananas;s__candidatus magnetananas tsingtaoensis;superkingdom__bacteria;subphylum__delta/epsilon subdivisions	91.8224	1.34237e-173	614.432	63	6	120	3	0.0329114	0.00357777	0.0457023	0.00133446	0.0260627
Zotu1411	candidatus magnetananas tsingtaoensis ;k__bacteria;p__proteobacteria;c__deltaproteobacteria;o__desulfobacterales;f__desulfobacteraceae;g__candidatus magnetananas;s__candidatus magnetananas tsingtaoensis;superkingdom__bacteria;subphylum__delta/epsilon subdivisions	93.2243	0	642.384	35	22	1	1	0.0182841	0.0131185	0.000380852	0.00044482	0.0101497
Zotu2239	candidatus magnetananas tsingtaoensis ;k__bacteria;p__proteobacteria;c__deltaproteobacteria;o__desulfobacterales;f__desulfobacteraceae;g__candidatus magnetananas;s__candidatus magnetananas tsingtaoensis;superkingdom__bacteria;subphylum__delta/epsilon subdivisions	91.5888	1.63534e-172	610.825	0	0	42	0	0	0	0.0159958	0	0.00533193
Zotu53	candidatus magnetobacterium bavaricum ;k__bacteria;p__nitrospirae;c__nitrospira;o__nitrospirales;f__nitrospiraceae;g__candidatus magnetobacterium;s__candidatus magnetobacterium bavaricum;superkingdom__bacteria	88.5856	3.15495e-143	513.443	534	110	1349	5	0.278963	0.0655925	0.51377	0.0022241	0.283884
Zotu123	candidatus magnetobacterium bavaricum ;k__bacteria;p__nitrospirae;c__nitrospira;o__nitrospirales;f__nitrospiraceae;g__candidatus magnetobacterium;s__candidatus magnetobacterium bavaricum;superkingdom__bacteria	90.5473	1.03045e-155	554.921	453	189	437	2	0.236649	0.1127	0.166432	0.00088964	0.171037
Zotu239	candidatus magnetobacterium bavaricum ;k__bacteria;p__nitrospirae;c__nitrospira;o__nitrospirales;f__nitrospiraceae;g__candidatus magnetobacterium;s__candidatus magnetobacterium bavaricum;superkingdom__bacteria	90.0498	5.33786e-153	545.904	244	10	206	1	0.127466	0.00596296	0.0784556	0.00044482	0.0701835
Zotu301	candidatus magnetobacterium bavaricum ;k__bacteria;p__nitrospirae;c__nitrospira;o__nitrospirales;f__nitrospiraceae;g__candidatus magnetobacterium;s__candidatus magnetobacterium bavaricum;superkingdom__bacteria	91.0448	1.98924e-158	563.937	120	59	228	2	0.0626884	0.0351815	0.0868343	0.00088964	0.0606784
Zotu381	candidatus magnetobacterium bavaricum ;k__bacteria;p__nitrospirae;c__nitrospira;o__nitrospirales;f__nitrospiraceae;g__candidatus magnetobacterium;s__candidatus magnetobacterium bavaricum;superkingdom__bacteria	88.3085	3.15495e-143	514.345	143	6	231	0	0.0747037	0.00357777	0.0879769	0	0.0554194
Zotu447	candidatus magnetobacterium bavaricum ;k__bacteria;p__nitrospirae;c__nitrospira;o__nitrospirales;f__nitrospiraceae;g__candidatus magnetobacterium;s__candidatus magnetobacterium bavaricum;superkingdom__bacteria	89.8263	9.65108e-150	535.985	84	19	223	1	0.0438819	0.0113296	0.0849301	0.00044482	0.046269
Zotu377	candidatus magnetobacterium bavaricum ;k__bacteria;p__nitrospirae;c__nitrospira;o__nitrospirales;f__nitrospiraceae;g__candidatus magnetobacterium;s__candidatus magnetobacterium bavaricum;superkingdom__bacteria	89.801	2.26972e-151	541.395	55	8	273	1	0.0287322	0.00477037	0.103973	0.00044482	0.0453803
Zotu574	candidatus magnetobacterium bavaricum ;k__bacteria;p__nitrospirae;c__nitrospira;o__nitrospirales;f__nitrospiraceae;g__candidatus magnetobacterium;s__candidatus magnetobacterium bavaricum;superkingdom__bacteria	90.796	8.45844e-157	559.429	105	17	72	0	0.0548523	0.010137	0.0274214	0	0.0308036
Zotu661	candidatus magnetobacterium bavaricum ;k__bacteria;p__nitrospirae;c__nitrospira;o__nitrospirales;f__nitrospiraceae;g__candidatus magnetobacterium;s__candidatus magnetobacterium bavaricum;superkingdom__bacteria	90.796	8.45844e-157	558.527	48	54	43	3	0.0250754	0.0322	0.0163766	0.00133446	0.0232162
Zotu737	candidatus magnetobacterium bavaricum ;k__bacteria;p__nitrospirae;c__nitrospira;o__nitrospirales;f__nitrospiraceae;g__candidatus magnetobacterium;s__candidatus magnetobacterium bavaricum;superkingdom__bacteria	88.5572	7.41974e-145	518.853	20	0	150	2	0.0104481	0	0.0571278	0.00088964	0.0216357
Zotu960	candidatus magnetobacterium bavaricum ;k__bacteria;p__nitrospirae;c__nitrospira;o__nitrospirales;f__nitrospiraceae;g__candidatus magnetobacterium;s__candidatus magnetobacterium bavaricum;superkingdom__bacteria	89.33	4.99938e-147	526.067	59	0	91	1	0.0308218	0	0.0346576	0.00044482	0.0213816
Zotu838	candidatus magnetobacterium bavaricum ;k__bacteria;p__nitrospirae;c__nitrospira;o__nitrospirales;f__nitrospiraceae;g__candidatus magnetobacterium;s__candidatus magnetobacterium bavaricum;superkingdom__bacteria	88.5572	7.41974e-145	518.853	47	9	76	2	0.024553	0.00536666	0.0289448	0.00088964	0.0187318
Zotu744	candidatus magnetobacterium bavaricum ;k__bacteria;p__nitrospirae;c__nitrospira;o__nitrospirales;f__nitrospiraceae;g__candidatus magnetobacterium;s__candidatus magnetobacterium bavaricum;superkingdom__bacteria	88.5856	3.15495e-143	513.443	20	0	104	0	0.0104481	0	0.0396086	0	0.0166856
Zotu1091	candidatus magnetobacterium bavaricum ;k__bacteria;p__nitrospirae;c__nitrospira;o__nitrospirales;f__nitrospiraceae;g__candidatus magnetobacterium;s__candidatus magnetobacterium bavaricum;superkingdom__bacteria	88.8337	2.58974e-144	517.951	41	0	65	0	0.0214185	0	0.0247554	0	0.0153913
Zotu786	candidatus magnetobacterium bavaricum ;k__bacteria;p__nitrospirae;c__nitrospira;o__nitrospirales;f__nitrospiraceae;g__candidatus magnetobacterium;s__candidatus magnetobacterium bavaricum;superkingdom__bacteria	88.806	6.09049e-146	522.46	9	1	105	1	0.00470163	0.000596296	0.0399895	0.00044482	0.014651
Zotu1140	candidatus magnetobacterium bavaricum ;k__bacteria;p__nitrospirae;c__nitrospira;o__nitrospirales;f__nitrospiraceae;g__candidatus magnetobacterium;s__candidatus magnetobacterium bavaricum;superkingdom__bacteria	89.33	4.99938e-147	526.067	35	1	58	0	0.0182841	0.000596296	0.0220894	0	0.0136566
Zotu1225	candidatus magnetobacterium bavaricum ;k__bacteria;p__nitrospirae;c__nitrospira;o__nitrospirales;f__nitrospiraceae;g__candidatus magnetobacterium;s__candidatus magnetobacterium bavaricum;superkingdom__bacteria	89.5782	1.17574e-148	531.477	40	14	28	0	0.0208961	0.00834814	0.0106639	0	0.0133027
Zotu1249	candidatus magnetobacterium bavaricum ;k__bacteria;p__nitrospirae;c__nitrospira;o__nitrospirales;f__nitrospiraceae;g__candidatus magnetobacterium;s__candidatus magnetobacterium bavaricum;superkingdom__bacteria	86.3184	2.27172e-132	478.277	33	1	60	1	0.0172393	0.000596296	0.0228511	0.00044482	0.0131174
Zotu1147	candidatus magnetobacterium bavaricum ;k__bacteria;p__nitrospirae;c__nitrospira;o__nitrospirales;f__nitrospiraceae;g__candidatus magnetobacterium;s__candidatus magnetobacterium bavaricum;superkingdom__bacteria	85.8209	1.17678e-129	468.359	14	0	66	0	0.00731365	0	0.0251362	0	0.0108166
Zotu1184	candidatus magnetobacterium bavaricum ;k__bacteria;p__nitrospirae;c__nitrospira;o__nitrospirales;f__nitrospiraceae;g__candidatus magnetobacterium;s__candidatus magnetobacterium bavaricum;superkingdom__bacteria	88.3085	3.15495e-143	513.443	13	0	66	1	0.00679124	0	0.0251362	0.00044482	0.0101977
Zotu1693	candidatus magnetobacterium bavaricum ;k__bacteria;p__nitrospirae;c__nitrospira;o__nitrospirales;f__nitrospiraceae;g__candidatus magnetobacterium;s__candidatus magnetobacterium bavaricum;superkingdom__bacteria	83.8631	4.77517e-122	443.112	9	33	0	0	0.00470163	0.0196778	0	0	0.00812646
Zotu1666	candidatus magnetobacterium bavaricum ;k__bacteria;p__nitrospirae;c__nitrospira;o__nitrospirales;f__nitrospiraceae;g__candidatus magnetobacterium;s__candidatus magnetobacterium bavaricum;superkingdom__bacteria	88.5572	7.41974e-145	518.853	14	0	41	0	0.00731365	0	0.0156149	0	0.00764286
Zotu1381	candidatus magnetobacterium bavaricum ;k__bacteria;p__nitrospirae;c__nitrospira;o__nitrospirales;f__nitrospiraceae;g__candidatus magnetobacterium;s__candidatus magnetobacterium bavaricum;superkingdom__bacteria	89.0819	6.09049e-146	522.46	0	0	61	1	0	0	0.023232	0.00044482	0.00729918
Zotu1987	candidatus magnetobacterium bavaricum ;k__bacteria;p__nitrospirae;c__nitrospira;o__nitrospirales;f__nitrospiraceae;g__candidatus magnetobacterium;s__candidatus magnetobacterium bavaricum;superkingdom__bacteria	89.33	4.99938e-147	526.968	16	0	32	0	0.00835845	0	0.0121873	0	0.00684857
Zotu2080	candidatus magnetobacterium bavaricum ;k__bacteria;p__nitrospirae;c__nitrospira;o__nitrospirales;f__nitrospiraceae;g__candidatus magnetobacterium;s__candidatus magnetobacterium bavaricum;superkingdom__bacteria	89.0547	1.43235e-147	527.87	39	0	0	0	0.0203737	0	0	0	0.00679124
Zotu2203	candidatus magnetobacterium bavaricum ;k__bacteria;p__nitrospirae;c__nitrospira;o__nitrospirales;f__nitrospiraceae;g__candidatus magnetobacterium;s__candidatus magnetobacterium bavaricum;superkingdom__bacteria	88.806	6.09049e-146	522.46	6	22	1	0	0.00313442	0.0131185	0.000380852	0	0.00554459
Zotu2392	candidatus magnetobacterium bavaricum ;k__bacteria;p__nitrospirae;c__nitrospira;o__nitrospirales;f__nitrospiraceae;g__candidatus magnetobacterium;s__candidatus magnetobacterium bavaricum;superkingdom__bacteria	88.806	6.09049e-146	523.362	5	22	1	0	0.00261202	0.0131185	0.000380852	0	0.00537046
Zotu1792	candidatus magnetobacterium bavaricum ;k__bacteria;p__nitrospirae;c__nitrospira;o__nitrospirales;f__nitrospiraceae;g__candidatus magnetobacterium;s__candidatus magnetobacterium bavaricum;superkingdom__bacteria	86.0697	2.76752e-131	473.769	28	0	2	0	0.0146273	0	0.000761705	0	0.00512967
Zotu2052	candidatus magnetobacterium bavaricum ;k__bacteria;p__nitrospirae;c__nitrospira;o__nitrospirales;f__nitrospiraceae;g__candidatus magnetobacterium;s__candidatus magnetobacterium bavaricum;superkingdom__bacteria	88.5572	7.41974e-145	518.853	14	0	20	0	0.00731365	0	0.00761705	0	0.0049769
Zotu2063	candidatus magnetobacterium bavaricum ;k__bacteria;p__nitrospirae;c__nitrospira;o__nitrospirales;f__nitrospiraceae;g__candidatus magnetobacterium;s__candidatus magnetobacterium bavaricum;superkingdom__bacteria	87.3134	8.46592e-138	496.311	4	0	31	0	0.00208961	0	0.0118064	0	0.00463201
Zotu2788	candidatus magnetobacterium bavaricum ;k__bacteria;p__nitrospirae;c__nitrospira;o__nitrospirales;f__nitrospiraceae;g__candidatus magnetobacterium;s__candidatus magnetobacterium bavaricum;superkingdom__bacteria	89.0819	6.09049e-146	522.46	0	0	17	0	0	0	0.00647449	0	0.00215816
Zotu3094	candidatus magnetobacterium bavaricum ;k__bacteria;p__nitrospirae;c__nitrospira;o__nitrospirales;f__nitrospiraceae;g__candidatus magnetobacterium;s__candidatus magnetobacterium bavaricum;superkingdom__bacteria	88.0597	3.84352e-142	509.836	12	0	0	0	0.00626884	0	0	0	0.00208961
Zotu3163	candidatus magnetobacterium bavaricum ;k__bacteria;p__nitrospirae;c__nitrospira;o__nitrospirales;f__nitrospiraceae;g__candidatus magnetobacterium;s__candidatus magnetobacterium bavaricum;superkingdom__bacteria	88.806	6.09049e-146	523.362	11	0	0	0	0.00574644	0	0	0	0.00191548
Zotu108	candidatus magnetobacterium bavaricum ;k__bacteria;p__nitrospirae;c__nitrospira;o__nitrospirales;f__nitrospiraceae;g__candidatus magnetobacterium;s__candidatus magnetobacterium bavaricum;superkingdom__bacteria	89.604	4.99938e-147	526.067	34	4	123	1084	0.0177617	0.00238518	0.0468448	0.482185	-0.459854
Zotu787	candidatus magnetomorum litorale ;k__bacteria;p__proteobacteria;c__deltaproteobacteria;o__desulfobacterales;f__desulfobacteraceae;g__candidatus magnetomorum;s__candidatus magnetomorum litorale;superkingdom__bacteria;subphylum__delta/epsilon subdivisions	92.5234	6.09436e-178	628.859	40	32	63	0	0.0208961	0.0190815	0.0239937	0	0.0213238
Zotu99	candidatus magnetoovum mohavensis ;k__bacteria;p__nitrospirae;c__nitrospira;o__nitrospirales;f__nitrospiraceae;g__candidatus magnetoovum;s__candidatus magnetoovum mohavensis;superkingdom__bacteria	88.5572	7.41974e-145	518.853	460	64	714	49	0.240306	0.0381629	0.271929	0.0217962	0.161669
Zotu160	candidatus magnetoovum mohavensis ;k__bacteria;p__nitrospirae;c__nitrospira;o__nitrospirales;f__nitrospiraceae;g__candidatus magnetoovum;s__candidatus magnetoovum mohavensis;superkingdom__bacteria	91.0448	1.98924e-158	563.937	120	69	571	2	0.0626884	0.0411444	0.217467	0.00088964	0.10621
Zotu518	candidatus magnetoovum mohavensis ;k__bacteria;p__nitrospirae;c__nitrospira;o__nitrospirales;f__nitrospiraceae;g__candidatus magnetoovum;s__candidatus magnetoovum mohavensis;superkingdom__bacteria	88.806	6.09049e-146	522.46	2	0	205	0	0.00104481	0	0.0780747	0	0.0263732
Zotu1078	candidatus magnetoovum mohavensis ;k__bacteria;p__nitrospirae;c__nitrospira;o__nitrospirales;f__nitrospiraceae;g__candidatus magnetoovum;s__candidatus magnetoovum mohavensis;superkingdom__bacteria	88.3085	3.15495e-143	514.345	5	2	137	0	0.00261202	0.00119259	0.0521768	0	0.0186605
Zotu1171	candidatus magnetoovum mohavensis ;k__bacteria;p__nitrospirae;c__nitrospira;o__nitrospirales;f__nitrospiraceae;g__candidatus magnetoovum;s__candidatus magnetoovum mohavensis;superkingdom__bacteria	87.8109	1.63431e-140	504.426	1	1	69	0	0.000522403	0.000596296	0.0262788	0	0.0091325
Zotu359	candidatus methanomassiliicoccus intestinalis issoire_mx1 ;k__archaea;p__euryarchaeota;c__thermoplasmata;o__methanomassiliicoccales;f__methanomassiliicoccaceae;g__methanomassiliicoccus;s__candidatus methanomassiliicoccus intestinalis;superkingdom__archaea	84.375	5.10161e-115	419.668	21	0	281	0	0.0109705	0	0.107019	0	0.03933
Zotu511	candidatus methanomassiliicoccus intestinalis issoire_mx1 ;k__archaea;p__euryarchaeota;c__thermoplasmata;o__methanomassiliicoccales;f__methanomassiliicoccaceae;g__methanomassiliicoccus;s__candidatus methanomassiliicoccus intestinalis;superkingdom__archaea	83.8542	2.6427e-112	410.651	12	0	213	0	0.00626884	0	0.0811215	0	0.0291301
Zotu627	candidatus methanomassiliicoccus intestinalis issoire_mx1 ;k__archaea;p__euryarchaeota;c__thermoplasmata;o__methanomassiliicoccales;f__methanomassiliicoccaceae;g__methanomassiliicoccus;s__candidatus methanomassiliicoccus intestinalis;superkingdom__archaea	84.1146	2.16926e-113	414.258	7	1	178	0	0.00365682	0.000596296	0.0677917	0	0.0240149
Zotu2018	candidatus methanomassiliicoccus intestinalis issoire_mx1 ;k__archaea;p__euryarchaeota;c__thermoplasmata;o__methanomassiliicoccales;f__methanomassiliicoccaceae;g__methanomassiliicoccus;s__candidatus methanomassiliicoccus intestinalis;superkingdom__archaea	85.9375	3.67017e-123	446.718	9	0	35	0	0.00470163	0	0.0133298	0	0.00601049
Zotu2141	candidatus methanomassiliicoccus intestinalis issoire_mx1 ;k__archaea;p__euryarchaeota;c__thermoplasmata;o__methanomassiliicoccales;f__methanomassiliicoccaceae;g__methanomassiliicoccus;s__candidatus methanomassiliicoccus intestinalis;superkingdom__archaea	85.1562	2.81363e-118	430.488	20	5	0	0	0.0104481	0.00298148	0	0	0.00447651
Zotu2180	candidatus methanomassiliicoccus intestinalis issoire_mx1 ;k__archaea;p__euryarchaeota;c__thermoplasmata;o__methanomassiliicoccales;f__methanomassiliicoccaceae;g__methanomassiliicoccus;s__candidatus methanomassiliicoccus intestinalis;superkingdom__archaea	85.4167	2.81363e-118	430.488	21	0	0	0	0.0109705	0	0	0	0.00365682
Zotu2566	candidatus methanomassiliicoccus intestinalis issoire_mx1 ;k__archaea;p__euryarchaeota;c__thermoplasmata;o__methanomassiliicoccales;f__methanomassiliicoccaceae;g__methanomassiliicoccus;s__candidatus methanomassiliicoccus intestinalis;superkingdom__archaea	83.5509	4.76458e-109	400.732	2	0	20	0	0.00104481	0	0.00761705	0	0.00288728
Zotu127	candidatus methanomassiliicoccus intestinalis issoire_mx1 ;k__archaea;p__euryarchaeota;c__thermoplasmata;o__methanomassiliicoccales;f__methanomassiliicoccaceae;g__methanomassiliicoccus;s__candidatus methanomassiliicoccus intestinalis;superkingdom__archaea	84.9351	4.18766e-116	423.275	34	0	635	210	0.0177617	0	0.241841	0.0934122	-0.00687791
Zotu386	candidatus methanomassiliicoccus intestinalis issoire_mx1 ;k__archaea;p__euryarchaeota;c__thermoplasmata;o__methanomassiliicoccales;f__methanomassiliicoccaceae;g__methanomassiliicoccus;s__candidatus methanomassiliicoccus intestinalis;superkingdom__archaea	84.6753	1.78064e-114	418.766	23	0	84	187	0.0120153	0	0.0319916	0.0831814	-0.0685124
Zotu2620	candidatus nitrosocaldus yellowstonii ;k__archaea;p__crenarchaeota;c__crenarchaeota;o__crenarchaeota;f__crenarchaeota;g__candidatus nitrosocaldus;s__candidatus nitrosocaldus yellowstonii;superkingdom__archaea	81.5104	9.8292e-99	366.468	21	2	1	0	0.0109705	0.00119259	0.000380852	0	0.0041813
Zotu2736	candidatus nitrosocaldus yellowstonii ;k__archaea;p__crenarchaeota;c__crenarchaeota;o__crenarchaeota;f__crenarchaeota;g__candidatus nitrosocaldus;s__candidatus nitrosocaldus yellowstonii;superkingdom__archaea	81.9843	5.42093e-102	377.289	6	0	22	0	0.00313442	0	0.00837875	0	0.00383772
Zotu2534	candidatus nitrosocaldus yellowstonii ;k__archaea;p__crenarchaeota;c__crenarchaeota;o__crenarchaeota;f__crenarchaeota;g__candidatus nitrosocaldus;s__candidatus nitrosocaldus yellowstonii;superkingdom__archaea	78.3505	6.70404e-82	309.662	15	0	0	0	0.00783605	0	0	0	0.00261202
Zotu2220	candidatus nitrotoga arctica ;k__bacteria;p__proteobacteria;c__betaproteobacteria;o__nitrosomonadales;f__gallionellaceae;g__candidatus nitrotoga;s__candidatus nitrotoga arctica; superkingdom__bacteria;	97.6581	0	726.241	25	30	1	0	0.0130601	0.0178889	0.000380852	0	0.0104433
Zotu2065	candidatus nitrotoga arctica ;k__bacteria;p__proteobacteria;c__betaproteobacteria;o__nitrosomonadales;f__gallionellaceae;g__candidatus nitrotoga;s__candidatus nitrotoga arctica; superkingdom__bacteria;	98.1265	0	735.257	2	0	69	0	0.00104481	0	0.0262788	0	0.00910787
Zotu1828	candidatus nitrotoga arctica ;k__bacteria;p__proteobacteria;c__betaproteobacteria;o__nitrosomonadales;f__gallionellaceae;g__candidatus nitrotoga;s__candidatus nitrotoga arctica; superkingdom__bacteria;	99.7658	0	765.915	14	0	54	1	0.00731365	0	0.020566	0.00044482	0.0088484
Zotu2838	candidatus renichlamydia lutjani ;k__bacteria;p__chlamydiae;c__chlamydiia;o__parachlamydiales;f__rhabdochlamydiaceae;g__candidatus renichlamydia;s__candidatus renichlamydia lutjani; superkingdom__bacteria;	91.8415	1.63947e-172	610.825	0	0	0	20	0	0	0	0.0088964	-0.0088964
Zotu188	candidatus renichlamydia lutjani ;k__bacteria;p__chlamydiae;c__chlamydiia;o__parachlamydiales;f__rhabdochlamydiaceae;g__candidatus renichlamydia;s__candidatus renichlamydia lutjani; superkingdom__bacteria;	92.3077	3.16493e-175	619.842	4	0	5	845	0.00208961	0	0.00190426	0.375873	-0.374542
Zotu2269	candidatus saccharimonas aalborgensis ;k__bacteria;p__candidatus saccharibacteria;c__candidatus saccharibacteria;o__candidatus saccharibacteria;f__candidatus saccharibacteria;g__candidatus saccharimonas;s__candidatus saccharimonas aalborgensis;superkingdom__bacteria	79.6526	2.7874e-93	347.533	1	25	0	0	0.000522403	0.0149074	0	0	0.00514327
Zotu3188	candidatus saccharimonas aalborgensis ;k__bacteria;p__candidatus saccharibacteria;c__candidatus saccharibacteria;o__candidatus saccharibacteria;f__candidatus saccharibacteria;g__candidatus saccharimonas;s__candidatus saccharimonas aalborgensis;superkingdom__bacteria	84.2893	6.97419e-120	436.8	0	1	15	1	0	0.000596296	0.00571278	0.00044482	0.00165821
Zotu529	candidatus scalindua marina ;k__bacteria;p__planctomycetes;c__candidatus brocadiia;o__candidatus brocadiales;f__candidatus scalinduaceae;g__candidatus scalindua;s__candidatus scalindua marina; superkingdom__bacteria;	79.6651	6.94302e-95	352.943	0	1	256	0	0	0.000596296	0.0974982	0	0.0326982
Zotu798	candidatus soleaferrea massiliensis ap7 ;k__bacteria;p__firmicutes;c__clostridia;o__eubacteriales;f__ruminococcaceae;g__candidatus soleaferrea;s__candidatus soleaferrea massiliensis;superkingdom__bacteria;	94.2643	2.94171e-175	619.842	11	107	1	1	0.00574644	0.0638037	0.000380852	0.00044482	0.0228655
Zotu2626	candidatus soleaferrea massiliensis ap7 ;k__bacteria;p__firmicutes;c__clostridia;o__eubacteriales;f__ruminococcaceae;g__candidatus soleaferrea;s__candidatus soleaferrea massiliensis;superkingdom__bacteria;	94.0299	1.25424e-173	614.432	28	13	0	0	0.0146273	0.00775185	0	0	0.00745971
Zotu2658	candidatus soleaferrea massiliensis ap7 ;k__bacteria;p__firmicutes;c__clostridia;o__eubacteriales;f__ruminococcaceae;g__candidatus soleaferrea;s__candidatus soleaferrea massiliensis;superkingdom__bacteria;	93.5162	1.85642e-171	607.218	5	20	0	1	0.00261202	0.0119259	0	0.00044482	0.00440116
Zotu2198	candidatus soleaferrea massiliensis ap7 ;k__bacteria;p__firmicutes;c__clostridia;o__eubacteriales;f__ruminococcaceae;g__candidatus soleaferrea;s__candidatus soleaferrea massiliensis;superkingdom__bacteria;	93.5323	6.4971e-171	605.415	3	17	1	0	0.00156721	0.010137	0.000380852	0	0.00402836
Zotu181	candidatus solibacter usitatus ;k__bacteria;p__acidobacteria;c__acidobacteriia;o__bryobacterales;f__solibacteraceae;g__candidatus solibacter;s__candidatus solibacter usitatus; superkingdom__bacteria;	95.0249	3.83674e-180	636.072	206	101	394	3	0.107615	0.0602259	0.150056	0.00133446	0.104631
Zotu435	candidatus solibacter usitatus ;k__bacteria;p__acidobacteria;c__acidobacteriia;o__bryobacterales;f__solibacteraceae;g__candidatus solibacter;s__candidatus solibacter usitatus; superkingdom__bacteria;	94.2786	8.45098e-176	622.547	54	4	232	0	0.0282098	0.00238518	0.0883577	0	0.0396509
Zotu419	candidatus solibacter usitatus ;k__bacteria;p__acidobacteria;c__acidobacteriia;o__bryobacterales;f__solibacteraceae;g__candidatus solibacter;s__candidatus solibacter usitatus; superkingdom__bacteria;	92.2886	6.08512e-165	586.479	27	1	266	1	0.0141049	0.000596296	0.101307	0.00044482	0.0382245
Zotu685	candidatus solibacter usitatus ;k__bacteria;p__acidobacteria;c__acidobacteriia;o__bryobacterales;f__solibacteraceae;g__candidatus solibacter;s__candidatus solibacter usitatus; superkingdom__bacteria;	94.1624	1.86145e-171	607.218	80	111	3	3	0.0417923	0.0661888	0.00114256	0.00133446	0.0350401
Zotu1296	candidatus solibacter usitatus ;k__bacteria;p__acidobacteria;c__acidobacteriia;o__bryobacterales;f__solibacteraceae;g__candidatus solibacter;s__candidatus solibacter usitatus; superkingdom__bacteria;	93.2836	2.26771e-170	604.513	51	38	0	0	0.0266426	0.0226592	0	0	0.0164339
Zotu1012	candidatus solibacter usitatus ;k__bacteria;p__acidobacteria;c__acidobacteriia;o__bryobacterales;f__solibacteraceae;g__candidatus solibacter;s__candidatus solibacter usitatus; superkingdom__bacteria;	94.802	1.99822e-177	627.055	16	0	88	0	0.00835845	0	0.033515	0	0.0139578
Zotu1638	candidatus solibacter usitatus ;k__bacteria;p__acidobacteria;c__acidobacteriia;o__bryobacterales;f__solibacteraceae;g__candidatus solibacter;s__candidatus solibacter usitatus; superkingdom__bacteria;	92.7861	1.1747e-167	594.595	29	29	0	0	0.0151497	0.0172926	0	0	0.0108141
Zotu1387	candidatus solibacter usitatus ;k__bacteria;p__acidobacteria;c__acidobacteriia;o__bryobacterales;f__solibacteraceae;g__candidatus solibacter;s__candidatus solibacter usitatus; superkingdom__bacteria;	94.1624	1.86145e-171	608.12	6	2	73	0	0.00313442	0.00119259	0.0278022	0	0.0107097
Zotu1187	candidatus solibacter usitatus ;k__bacteria;p__acidobacteria;c__acidobacteriia;o__bryobacterales;f__solibacteraceae;g__candidatus solibacter;s__candidatus solibacter usitatus; superkingdom__bacteria;	93.9086	2.26771e-170	603.611	2	0	76	0	0.00104481	0	0.0289448	0	0.00999653
Zotu1884	candidatus solibacter usitatus ;k__bacteria;p__acidobacteria;c__acidobacteriia;o__bryobacterales;f__solibacteraceae;g__candidatus solibacter;s__candidatus solibacter usitatus; superkingdom__bacteria;	93.2836	2.26771e-170	604.513	35	15	1	0	0.0182841	0.00894444	0.000380852	0	0.00920313
Zotu1611	candidatus solibacter usitatus ;k__bacteria;p__acidobacteria;c__acidobacteriia;o__bryobacterales;f__solibacteraceae;g__candidatus solibacter;s__candidatus solibacter usitatus; superkingdom__bacteria;	93.5323	5.33315e-172	609.022	42	9	0	1	0.0219409	0.00536666	0	0.00044482	0.00865771
Zotu1938	candidatus solibacter usitatus ;k__bacteria;p__acidobacteria;c__acidobacteriia;o__bryobacterales;f__solibacteraceae;g__candidatus solibacter;s__candidatus solibacter usitatus; superkingdom__bacteria;	93.5323	5.33315e-172	609.022	10	28	0	0	0.00522403	0.0166963	0	0	0.00730677
Zotu2664	candidatus solibacter usitatus ;k__bacteria;p__acidobacteria;c__acidobacteriia;o__bryobacterales;f__solibacteraceae;g__candidatus solibacter;s__candidatus solibacter usitatus; superkingdom__bacteria;	94.1624	1.86145e-171	608.12	39	2	0	0	0.0203737	0.00119259	0	0	0.00718877
Zotu1607	candidatus solibacter usitatus ;k__bacteria;p__acidobacteria;c__acidobacteriia;o__bryobacterales;f__solibacteraceae;g__candidatus solibacter;s__candidatus solibacter usitatus; superkingdom__bacteria;	93.7811	4.37771e-173	612.628	13	0	34	0	0.00679124	0	0.012949	0	0.00658007
Zotu2556	candidatus solibacter usitatus ;k__bacteria;p__acidobacteria;c__acidobacteriia;o__bryobacterales;f__solibacteraceae;g__candidatus solibacter;s__candidatus solibacter usitatus; superkingdom__bacteria;	93.0348	2.76264e-169	600.005	30	0	0	0	0.0156721	0	0	0	0.00522403
Zotu2379	candidatus solibacter usitatus ;k__bacteria;p__acidobacteria;c__acidobacteriia;o__bryobacterales;f__solibacteraceae;g__candidatus solibacter;s__candidatus solibacter usitatus; superkingdom__bacteria;	93.0348	2.76264e-169	600.005	26	0	0	0	0.0135825	0	0	0	0.00452749
Zotu2485	candidatus solibacter usitatus ;k__bacteria;p__acidobacteria;c__acidobacteriia;o__bryobacterales;f__solibacteraceae;g__candidatus solibacter;s__candidatus solibacter usitatus; superkingdom__bacteria;	94.6701	3.59345e-174	617.137	18	7	0	0	0.00940326	0.00417407	0	0	0.00452578
Zotu3079	candidatus solibacter usitatus ;k__bacteria;p__acidobacteria;c__acidobacteriia;o__bryobacterales;f__solibacteraceae;g__candidatus solibacter;s__candidatus solibacter usitatus; superkingdom__bacteria;	95.5446	0	641.482	25	0	0	0	0.0130601	0	0	0	0.00435336
Zotu2004	candidatus thiobios zoothamnicoli ;k__bacteria;p__proteobacteria;c__gammaproteobacteria;o__gammaproteobacteria;f__gammaproteobacteria;g__candidatus thiobios;s__candidatus thiobios zoothamnicoli;superkingdom__bacteria	91.5633	1.34034e-160	571.151	38	0	0	1	0.0198513	0	0	0.00044482	0.00617229
Zotu1685	candidatus trichorickettsia mobilis ;k__bacteria;p__proteobacteria;c__alphaproteobacteria;o__rickettsiales;f__rickettsiaceae;g__candidatus trichorickettsia;s__candidatus trichorickettsia mobilis;superkingdom__bacteria;tribe__rickettsieae	91.2935	1.63286e-159	568.446	0	0	47	0	0	0	0.0179001	0	0.00596669
Zotu1861	carboxydothermus islandicus ;k__bacteria;p__firmicutes;c__clostridia;o__thermoanaerobacterales;f__thermoanaerobacteraceae;g__carboxydothermus;s__carboxydothermus islandicus;superkingdom__bacteria	84.7775	2.43136e-132	478.277	29	29	10	0	0.0151497	0.0172926	0.00380852	0	0.0120836
Zotu1493	carboxydothermus islandicus ;k__bacteria;p__firmicutes;c__clostridia;o__thermoanaerobacterales;f__thermoanaerobacteraceae;g__carboxydothermus;s__carboxydothermus islandicus;superkingdom__bacteria	80.6147	2.72754e-106	390.814	49	1	0	0	0.0255978	0.000596296	0	0	0.00873135
Zotu2029	carboxydothermus islandicus ;k__bacteria;p__firmicutes;c__clostridia;o__thermoanaerobacterales;f__thermoanaerobacteraceae;g__carboxydothermus;s__carboxydothermus islandicus;superkingdom__bacteria	80.8511	6.41457e-108	396.224	5	0	36	0	0.00261202	0	0.0137107	0	0.0054409
Zotu1846	carboxydothermus islandicus ;k__bacteria;p__firmicutes;c__clostridia;o__thermoanaerobacterales;f__thermoanaerobacteraceae;g__carboxydothermus;s__carboxydothermus islandicus;superkingdom__bacteria	85.0117	5.718e-134	482.786	4	0	34	0	0.00208961	0	0.012949	0	0.00501286
Zotu899	carboxydothermus pertinax ;k__bacteria;p__firmicutes;c__clostridia;o__thermoanaerobacterales;f__thermoanaerobacteraceae;g__carboxydothermus;s__carboxydothermus pertinax;superkingdom__bacteria	84.8131	2.95452e-131	473.769	40	96	3	0	0.0208961	0.0572444	0.00114256	0	0.0264277
Zotu826	carboxydothermus pertinax ;k__bacteria;p__firmicutes;c__clostridia;o__thermoanaerobacterales;f__thermoanaerobacteraceae;g__carboxydothermus;s__carboxydothermus pertinax;superkingdom__bacteria	84.0476	3.37964e-124	450.325	108	32	0	1	0.0564196	0.0190815	0	0.00044482	0.0247222
Zotu828	carboxydothermus pertinax ;k__bacteria;p__firmicutes;c__clostridia;o__thermoanaerobacterales;f__thermoanaerobacteraceae;g__carboxydothermus;s__carboxydothermus pertinax;superkingdom__bacteria	85.3828	1.6341e-134	484.589	1	1	136	0	0.000522403	0.000596296	0.0517959	0	0.0176382
Zotu1273	carboxydothermus pertinax ;k__bacteria;p__firmicutes;c__clostridia;o__thermoanaerobacterales;f__thermoanaerobacteraceae;g__carboxydothermus;s__carboxydothermus pertinax;superkingdom__bacteria	85.6148	1.34135e-135	489.098	16	24	47	0	0.00835845	0.0143111	0.0179001	0	0.0135232
Zotu1316	carboxydothermus pertinax ;k__bacteria;p__firmicutes;c__clostridia;o__thermoanaerobacterales;f__thermoanaerobacteraceae;g__carboxydothermus;s__carboxydothermus pertinax;superkingdom__bacteria	85.3488	6.96595e-133	480.081	44	1	35	0	0.0229857	0.000596296	0.0133298	0	0.012304
Zotu1921	carboxydothermus pertinax ;k__bacteria;p__firmicutes;c__clostridia;o__thermoanaerobacterales;f__thermoanaerobacteraceae;g__carboxydothermus;s__carboxydothermus pertinax;superkingdom__bacteria	84.4186	5.34189e-128	462.949	24	23	0	0	0.0125377	0.0137148	0	0	0.00875083
Zotu2748	carboxydothermus pertinax ;k__bacteria;p__firmicutes;c__clostridia;o__thermoanaerobacterales;f__thermoanaerobacteraceae;g__carboxydothermus;s__carboxydothermus pertinax;superkingdom__bacteria	85.3147	1.63823e-134	485.491	13	0	36	0	0.00679124	0	0.0137107	0	0.00683397
Zotu2692	carboxydothermus pertinax ;k__bacteria;p__firmicutes;c__clostridia;o__thermoanaerobacterales;f__thermoanaerobacteraceae;g__carboxydothermus;s__carboxydothermus pertinax;superkingdom__bacteria	79.2363	1.2617e-91	343.025	26	0	0	0	0.0135825	0	0	0	0.00452749
Zotu3023	carboxydothermus pertinax ;k__bacteria;p__firmicutes;c__clostridia;o__thermoanaerobacterales;f__thermoanaerobacteraceae;g__carboxydothermus;s__carboxydothermus pertinax;superkingdom__bacteria	85.4801	1.10383e-136	491.803	16	2	9	0	0.00835845	0.00119259	0.00342767	0	0.00432624
Zotu372	cellulosilyticum lentocellum dsm 5427 ;k__bacteria;p__firmicutes;c__clostridia;o__eubacteriales;f__lachnospiraceae;g__cellulosilyticum;s__cellulosilyticum lentocellum;superkingdom__bacteria;	92.3457	1.44269e-166	591.89	134	215	2	1	0.070002	0.128204	0.000761705	0.00044482	0.0658776
Zotu953	cellulosilyticum lentocellum dsm 5427 ;k__bacteria;p__firmicutes;c__clostridia;o__eubacteriales;f__lachnospiraceae;g__cellulosilyticum;s__cellulosilyticum lentocellum;superkingdom__bacteria;	91.1905	2.89704e-169	600.005	33	79	0	2	0.0172393	0.0471074	0	0.00088964	0.0205593
Zotu859	cellulosilyticum lentocellum dsm 5427 ;k__bacteria;p__firmicutes;c__clostridia;o__eubacteriales;f__lachnospiraceae;g__cellulosilyticum;s__cellulosilyticum lentocellum;superkingdom__bacteria;	99.0099	0	711.814	5	6	140	2	0.00261202	0.00357777	0.0533193	0.00088964	0.0189467
Zotu1530	cellulosilyticum lentocellum dsm 5427 ;k__bacteria;p__firmicutes;c__clostridia;o__eubacteriales;f__lachnospiraceae;g__cellulosilyticum;s__cellulosilyticum lentocellum;superkingdom__bacteria;	99.2574	0	715.42	9	63	4	0	0.00470163	0.0375666	0.00152341	0	0.0145972
Zotu1478	cellulosilyticum lentocellum dsm 5427 ;k__bacteria;p__firmicutes;c__clostridia;o__eubacteriales;f__lachnospiraceae;g__cellulosilyticum;s__cellulosilyticum lentocellum;superkingdom__bacteria;	96.5347	0	666.729	0	49	1	0	0	0.0292185	0.000380852	0	0.00986645
Zotu1657	cellulosilyticum lentocellum dsm 5427 ;k__bacteria;p__firmicutes;c__clostridia;o__eubacteriales;f__lachnospiraceae;g__cellulosilyticum;s__cellulosilyticum lentocellum;superkingdom__bacteria;	99.2574	0	715.42	6	45	0	1	0.00313442	0.0268333	0	0.00044482	0.00954442
Zotu1705	cellulosilyticum lentocellum dsm 5427 ;k__bacteria;p__firmicutes;c__clostridia;o__eubacteriales;f__lachnospiraceae;g__cellulosilyticum;s__cellulosilyticum lentocellum;superkingdom__bacteria;	90.7143	4.29958e-167	592.791	0	47	0	0	0	0.0280259	0	0	0.00934197
Zotu1907	cellulosilyticum lentocellum dsm 5427 ;k__bacteria;p__firmicutes;c__clostridia;o__eubacteriales;f__lachnospiraceae;g__cellulosilyticum;s__cellulosilyticum lentocellum;superkingdom__bacteria;	90.9953	3.54751e-168	597.3	1	44	0	0	0.000522403	0.026237	0	0	0.00891981
Zotu2208	cellulosilyticum lentocellum dsm 5427 ;k__bacteria;p__firmicutes;c__clostridia;o__eubacteriales;f__lachnospiraceae;g__cellulosilyticum;s__cellulosilyticum lentocellum;superkingdom__bacteria;	91.2322	8.34293e-170	601.808	7	38	0	1	0.00365682	0.0226592	0	0.00044482	0.0083272
Zotu2763	cellulosilyticum lentocellum dsm 5427 ;k__bacteria;p__firmicutes;c__clostridia;o__eubacteriales;f__lachnospiraceae;g__cellulosilyticum;s__cellulosilyticum lentocellum;superkingdom__bacteria;	91.1905	8.30015e-170	601.808	3	36	0	0	0.00156721	0.0214666	0	0	0.00767795
Zotu1793	cellulosilyticum lentocellum dsm 5427 ;k__bacteria;p__firmicutes;c__clostridia;o__eubacteriales;f__lachnospiraceae;g__cellulosilyticum;s__cellulosilyticum lentocellum;superkingdom__bacteria;	90.7143	4.29958e-167	592.791	2	38	1	1	0.00104481	0.0226592	0.000380852	0.00044482	0.00758348
Zotu2212	cellulosilyticum lentocellum dsm 5427 ;k__bacteria;p__firmicutes;c__clostridia;o__eubacteriales;f__lachnospiraceae;g__cellulosilyticum;s__cellulosilyticum lentocellum;superkingdom__bacteria;	93.0864	6.54978e-171	605.415	20	12	1	0	0.0104481	0.00715555	0.000380852	0	0.00599482
Zotu2431	cellulosilyticum lentocellum dsm 5427 ;k__bacteria;p__firmicutes;c__clostridia;o__eubacteriales;f__lachnospiraceae;g__cellulosilyticum;s__cellulosilyticum lentocellum;superkingdom__bacteria;	91.1905	8.30015e-170	601.808	3	29	0	2	0.00156721	0.0172926	0	0.00088964	0.00539696
Zotu2509	cellulosilyticum lentocellum dsm 5427 ;k__bacteria;p__firmicutes;c__clostridia;o__eubacteriales;f__lachnospiraceae;g__cellulosilyticum;s__cellulosilyticum lentocellum;superkingdom__bacteria;	90.9953	1.01638e-168	598.201	3	21	0	0	0.00156721	0.0125222	0	0	0.00469647
Zotu2528	cellulosilyticum lentocellum dsm 5427 ;k__bacteria;p__firmicutes;c__clostridia;o__eubacteriales;f__lachnospiraceae;g__cellulosilyticum;s__cellulosilyticum lentocellum;superkingdom__bacteria;	90.9524	3.52931e-168	597.3	0	20	0	0	0	0.0119259	0	0	0.00397531
Zotu3175	cellulosilyticum lentocellum dsm 5427 ;k__bacteria;p__firmicutes;c__clostridia;o__eubacteriales;f__lachnospiraceae;g__cellulosilyticum;s__cellulosilyticum lentocellum;superkingdom__bacteria;	93.5802	1.26441e-173	614.432	8	11	0	0	0.00417923	0.00655925	0	0	0.00357949
Zotu1579	cellulosilyticum ruminicola ;k__bacteria;p__firmicutes;c__clostridia;o__eubacteriales;f__lachnospiraceae;g__cellulosilyticum;s__cellulosilyticum ruminicola;superkingdom__bacteria;	94.0741	3.61287e-174	616.235	17	36	0	1	0.00888086	0.0214666	0	0.00044482	0.00967101
Zotu1636	cellulosilyticum ruminicola ;k__bacteria;p__firmicutes;c__clostridia;o__eubacteriales;f__lachnospiraceae;g__cellulosilyticum;s__cellulosilyticum ruminicola;superkingdom__bacteria;	90.5437	9.51928e-163	578.364	10	35	0	0	0.00522403	0.0208704	0	0	0.00869813
Zotu1404	chromocurvus halotolerans ;k__bacteria;p__proteobacteria;c__gammaproteobacteria;o__cellvibrionales;f__halieaceae;g__chromatocurvus;s__chromocurvus halotolerans; superkingdom__bacteria;	97.6581	0	726.241	39	33	0	0	0.0203737	0.0196778	0	0	0.0133505
Zotu326	cloacibacterium normanense ;k__bacteria;p__bacteroidetes;c__flavobacteriia;o__flavobacteriales;f__weeksellaceae;g__cloacibacterium;s__cloacibacterium normanense;superkingdom__bacteria;	99.763	0	757.8	0	0	416	4	0	0	0.158435	0.00177928	0.0510322
Zotu801	cloacibacterium normanense ;k__bacteria;p__bacteroidetes;c__flavobacteriia;o__flavobacteriales;f__weeksellaceae;g__cloacibacterium;s__cloacibacterium normanense;superkingdom__bacteria;	100	0	762.308	0	12	1	170	0	0.00715555	0.000380852	0.0756194	-0.0731073
Zotu2259	clostridium acetobutylicum ;k__bacteria;p__firmicutes;c__clostridia;o__eubacteriales;f__clostridiaceae;g__clostridium;s__clostridium acetobutylicum;superkingdom__bacteria;	100	0	726.241	9	32	1	0	0.00470163	0.0190815	0.000380852	0	0.00805465
Zotu134	clostridium acidurici 9a ;k__bacteria;p__firmicutes;c__tissierellia;o__tissierellales;f__gottschalkiaceae;g__gottschalkia;s__gottschalkia acidurici; superkingdom__bacteria;species__anaerobacter;superkingdom__bacteria;species__anaerobacter;superkingdom__bacteria;species__anaerobacter;superkingdom__bacteria;species__anaerobacter;superkingdom__bacteria;species__anaerobacter;superkingdom__bacteria;sp…	96.2594	0	656.811	119	410	374	3	0.062166	0.244481	0.142439	0.00133446	0.148361
Zotu796	clostridium aldrichii ;k__bacteria;p__firmicutes;c__clostridia;o__eubacteriales;f__oscillospiraceae;g__ruminiclostridium;s__clostridium aldrichii;superkingdom__bacteria;	93.5802	4.41321e-173	612.628	1	1	168	0	0.000522403	0.000596296	0.0639832	0	0.0217006
Zotu1186	clostridium aldrichii ;k__bacteria;p__firmicutes;c__clostridia;o__eubacteriales;f__oscillospiraceae;g__ruminiclostridium;s__clostridium aldrichii;superkingdom__bacteria;	95.5556	0	648.696	21	73	1	1	0.0109705	0.0435296	0.000380852	0.00044482	0.0178488
Zotu1391	clostridium aldrichii ;k__bacteria;p__firmicutes;c__clostridia;o__eubacteriales;f__oscillospiraceae;g__ruminiclostridium;s__clostridium aldrichii;superkingdom__bacteria;	96.5261	0	662.221	16	48	1	0	0.00835845	0.0286222	0.000380852	0	0.0124538
Zotu1559	clostridium aldrichii ;k__bacteria;p__firmicutes;c__clostridia;o__eubacteriales;f__oscillospiraceae;g__ruminiclostridium;s__clostridium aldrichii;superkingdom__bacteria;	95.0617	0	639.679	12	53	1	1	0.00626884	0.0316037	0.000380852	0.00044482	0.0123063
Zotu1954	clostridium aldrichii ;k__bacteria;p__firmicutes;c__clostridia;o__eubacteriales;f__oscillospiraceae;g__ruminiclostridium;s__clostridium aldrichii;superkingdom__bacteria;	96.7901	0	672.139	15	30	0	0	0.00783605	0.0178889	0	0	0.00857497
Zotu1883	clostridium aldrichii ;k__bacteria;p__firmicutes;c__clostridia;o__eubacteriales;f__oscillospiraceae;g__ruminiclostridium;s__clostridium aldrichii;superkingdom__bacteria;	92.5558	5.00847e-166	590.086	0	38	0	0	0	0.0226592	0	0	0.00755308
Zotu2429	clostridium aldrichii ;k__bacteria;p__firmicutes;c__clostridia;o__eubacteriales;f__oscillospiraceae;g__ruminiclostridium;s__clostridium aldrichii;superkingdom__bacteria;	94.5409	6.95573e-177	625.252	9	31	0	2	0.00470163	0.0184852	0	0.00088964	0.00683929
Zotu2249	clostridium aldrichii ;k__bacteria;p__firmicutes;c__clostridia;o__eubacteriales;f__oscillospiraceae;g__ruminiclostridium;s__clostridium aldrichii;superkingdom__bacteria;	94.5409	6.95573e-177	626.154	3	28	0	0	0.00156721	0.0166963	0	0	0.00608783
Zotu2497	clostridium aldrichii ;k__bacteria;p__firmicutes;c__clostridia;o__eubacteriales;f__oscillospiraceae;g__ruminiclostridium;s__clostridium aldrichii;superkingdom__bacteria;	95.0372	1.34277e-179	635.17	1	25	0	0	0.000522403	0.0149074	0	0	0.00514327
Zotu2720	clostridium aldrichii ;k__bacteria;p__firmicutes;c__clostridia;o__eubacteriales;f__oscillospiraceae;g__ruminiclostridium;s__clostridium aldrichii;superkingdom__bacteria;	95.0372	1.34277e-179	635.17	4	19	0	0	0.00208961	0.0113296	0	0	0.00447308
Zotu3011	clostridium aldrichii ;k__bacteria;p__firmicutes;c__clostridia;o__eubacteriales;f__oscillospiraceae;g__ruminiclostridium;s__clostridium aldrichii;superkingdom__bacteria;	95.2736	0	641.482	6	16	0	0	0.00313442	0.00954073	0	0	0.00422505
Zotu2492	clostridium aldrichii ;k__bacteria;p__firmicutes;c__clostridia;o__eubacteriales;f__oscillospiraceae;g__ruminiclostridium;s__clostridium aldrichii;superkingdom__bacteria;	95.0495	1.10519e-180	637.875	0	20	0	0	0	0.0119259	0	0	0.00397531
Zotu2751	clostridium aldrichii ;k__bacteria;p__firmicutes;c__clostridia;o__eubacteriales;f__oscillospiraceae;g__ruminiclostridium;s__clostridium aldrichii;superkingdom__bacteria;	94.5409	6.95573e-177	626.154	0	20	0	0	0	0.0119259	0	0	0.00397531
Zotu2987	clostridium aldrichii ;k__bacteria;p__firmicutes;c__clostridia;o__eubacteriales;f__oscillospiraceae;g__ruminiclostridium;s__clostridium aldrichii;superkingdom__bacteria;	95.2854	0	639.679	1	17	0	0	0.000522403	0.010137	0	0	0.00355314
Zotu3072	clostridium aldrichii ;k__bacteria;p__firmicutes;c__clostridia;o__eubacteriales;f__oscillospiraceae;g__ruminiclostridium;s__clostridium aldrichii;superkingdom__bacteria;	95.5556	0	648.696	4	11	0	0	0.00208961	0.00655925	0	0	0.00288296
Zotu1237	clostridium aminobutyricum ;k__bacteria;p__firmicutes;c__clostridia;o__eubacteriales;f__clostridiaceae;g__clostridium;s__clostridium aminobutyricum;superkingdom__bacteria;	97.7723	0	689.272	2	69	0	2	0.00104481	0.0411444	0	0.00088964	0.0131734
Zotu2227	clostridium aminobutyricum ;k__bacteria;p__firmicutes;c__clostridia;o__eubacteriales;f__clostridiaceae;g__clostridium;s__clostridium aminobutyricum;superkingdom__bacteria;	98.2673	0	698.288	13	32	0	0	0.00679124	0.0190815	0	0	0.00862424
Zotu2876	clostridium aminobutyricum ;k__bacteria;p__firmicutes;c__clostridia;o__eubacteriales;f__clostridiaceae;g__clostridium;s__clostridium aminobutyricum;superkingdom__bacteria;	98.2673	0	697.387	9	35	0	0	0.00470163	0.0208704	0	0	0.00852399
Zotu1845	clostridium aminobutyricum ;k__bacteria;p__firmicutes;c__clostridia;o__eubacteriales;f__clostridiaceae;g__clostridium;s__clostridium aminobutyricum;superkingdom__bacteria;	97.5248	0	684.763	1	38	0	0	0.000522403	0.0226592	0	0	0.00772721
Zotu2735	clostridium aminobutyricum ;k__bacteria;p__firmicutes;c__clostridia;o__eubacteriales;f__clostridiaceae;g__clostridium;s__clostridium aminobutyricum;superkingdom__bacteria;	95.7921	0	653.204	4	26	0	1	0.00208961	0.0155037	0	0.00044482	0.00541961
Zotu1300	clostridium aminovalericum ;k__bacteria;p__firmicutes;c__clostridia;o__eubacteriales;f__lachnospiraceae;g__lachnoclostridium;s__clostridium aminovalericum;superkingdom__bacteria;	97.7612	0	685.665	4	82	2	1	0.00208961	0.0488963	0.000761705	0.00044482	0.0168044
Zotu162	clostridium bovipellis ;k__bacteria;p__firmicutes;c__clostridia;o__eubacteriales;f__clostridiaceae;g__clostridium;s__clostridium bovipellis;superkingdom__bacteria;	99.7512	0	722.634	224	299	270	2	0.117018	0.178292	0.10283	0.00088964	0.131824
Zotu1351	clostridium bovipellis ;k__bacteria;p__firmicutes;c__clostridia;o__eubacteriales;f__clostridiaceae;g__clostridium;s__clostridium bovipellis;superkingdom__bacteria;	85.7143	1.43361e-128	464.752	63	23	0	0	0.0329114	0.0137148	0	0	0.0155421
Zotu1615	clostridium bovipellis ;k__bacteria;p__firmicutes;c__clostridia;o__eubacteriales;f__clostridiaceae;g__clostridium;s__clostridium bovipellis;superkingdom__bacteria;	85.7143	1.43361e-128	464.752	39	25	1	0	0.0203737	0.0149074	0.000380852	0	0.0118873
Zotu2261	clostridium bovipellis ;k__bacteria;p__firmicutes;c__clostridia;o__eubacteriales;f__clostridiaceae;g__clostridium;s__clostridium bovipellis;superkingdom__bacteria;	96.2687	0	659.516	1	29	0	0	0.000522403	0.0172926	0	0	0.00593833
Zotu2714	clostridium bovipellis ;k__bacteria;p__firmicutes;c__clostridia;o__eubacteriales;f__clostridiaceae;g__clostridium;s__clostridium bovipellis;superkingdom__bacteria;	85.213	7.4263e-126	455.735	30	0	0	0	0.0156721	0	0	0	0.00522403
Zotu12	clostridium butyricum ;k__bacteria;p__firmicutes;c__clostridia;o__eubacteriales;f__clostridiaceae;g__clostridium;s__clostridium butyricum;superkingdom__bacteria;	97.5124	0	681.156	1745	3932	220	30	0.911594	2.34464	0.0837875	0.0133446	1.09999
Zotu1062	clostridium cadaveris ;k__bacteria;p__firmicutes;c__clostridia;o__eubacteriales;f__clostridiaceae;g__clostridium;s__clostridium cadaveris;superkingdom__bacteria;	95.0249	3.83674e-180	636.072	29	64	0	1	0.0151497	0.0381629	0	0.00044482	0.0173261
Zotu2848	clostridium cadaveris ;k__bacteria;p__firmicutes;c__clostridia;o__eubacteriales;f__clostridiaceae;g__clostridium;s__clostridium cadaveris;superkingdom__bacteria;	94.7761	1.63142e-178	630.662	20	0	0	0	0.0104481	0	0	0	0.00348269
Zotu1623	clostridium caenicola ;k__bacteria;p__firmicutes;c__clostridia;o__eubacteriales;f__oscillospiraceae;g__ruminiclostridium;s__clostridium caenicola;superkingdom__bacteria;	88.8337	1.74967e-146	524.263	10	28	0	0	0.00522403	0.0166963	0	0	0.00730677
Zotu1990	clostridium caenicola ;k__bacteria;p__firmicutes;c__clostridia;o__eubacteriales;f__oscillospiraceae;g__ruminiclostridium;s__clostridium caenicola;superkingdom__bacteria;	93.3002	7.91509e-170	602.71	1	35	0	0	0.000522403	0.0208704	0	0	0.00713092
Zotu2526	clostridium caenicola ;k__bacteria;p__firmicutes;c__clostridia;o__eubacteriales;f__oscillospiraceae;g__ruminiclostridium;s__clostridium caenicola;superkingdom__bacteria;	89.1358	4.13702e-148	530.575	9	21	0	0	0.00470163	0.0125222	0	0	0.00574128
Zotu2399	clostridium caenicola ;k__bacteria;p__firmicutes;c__clostridia;o__eubacteriales;f__oscillospiraceae;g__ruminiclostridium;s__clostridium caenicola;superkingdom__bacteria;	95.2854	1.09924e-180	638.777	0	21	0	0	0	0.0125222	0	0	0.00417407
Zotu2886	clostridium carnis ;k__bacteria;p__firmicutes;c__clostridia;o__eubacteriales;f__clostridiaceae;g__clostridium;s__clostridium carnis;superkingdom__bacteria;	97.7612	0	686.566	9	14	0	0	0.00470163	0.00834814	0	0	0.00434992
Zotu72	clostridium cavendishii ;k__bacteria;p__firmicutes;c__clostridia;o__eubacteriales;f__clostridiaceae;g__clostridium;s__clostridium cavendishii;superkingdom__bacteria;	99.7512	0	720.83	356	1220	10	5	0.185976	0.727481	0.00380852	0.0022241	0.303531
Zotu550	clostridium cellobioparum ;k__bacteria;p__firmicutes;c__clostridia;o__eubacteriales;f__oscillospiraceae;g__ruminiclostridium;s__clostridium cellobioparum;superkingdom__bacteria;	95.0617	0	639.679	44	144	2	0	0.0229857	0.0858666	0.000761705	0	0.036538
Zotu1595	clostridium cellobioparum ;k__bacteria;p__firmicutes;c__clostridia;o__eubacteriales;f__oscillospiraceae;g__ruminiclostridium;s__clostridium cellobioparum;superkingdom__bacteria;	93.3333	5.37639e-172	609.022	12	51	2	0	0.00626884	0.0304111	0.000761705	0	0.0124805
Zotu2246	clostridium cellobioparum ;k__bacteria;p__firmicutes;c__clostridia;o__eubacteriales;f__oscillospiraceae;g__ruminiclostridium;s__clostridium cellobioparum;superkingdom__bacteria;	90.8189	2.44303e-157	561.232	0	29	0	0	0	0.0172926	0	0	0.00576419
Zotu3205	clostridium cellobioparum ;k__bacteria;p__firmicutes;c__clostridia;o__eubacteriales;f__oscillospiraceae;g__ruminiclostridium;s__clostridium cellobioparum;superkingdom__bacteria;	94.321	6.93698e-177	626.154	5	9	0	0	0.00261202	0.00536666	0	0	0.00265956
Zotu834	clostridium cellulovorans ;k__bacteria;p__firmicutes;c__clostridia;o__eubacteriales;f__clostridiaceae;g__clostridium;s__clostridium cellulovorans;superkingdom__bacteria;	98.7562	0	702.797	28	113	1	0	0.0146273	0.0673814	0.000380852	0	0.0274632
Zotu1505	clostridium cellulovorans ;k__bacteria;p__firmicutes;c__clostridia;o__eubacteriales;f__clostridiaceae;g__clostridium;s__clostridium cellulovorans;superkingdom__bacteria;	98.7562	0	702.797	35	27	0	1	0.0182841	0.0161	0	0.00044482	0.0110165
Zotu1631	clostridium cellulovorans ;k__bacteria;p__firmicutes;c__clostridia;o__eubacteriales;f__clostridiaceae;g__clostridium;s__clostridium cellulovorans;superkingdom__bacteria;	99.005	0	708.207	7	43	0	0	0.00365682	0.0256407	0	0	0.00976585
Zotu2071	clostridium cellulovorans ;k__bacteria;p__firmicutes;c__clostridia;o__eubacteriales;f__clostridiaceae;g__clostridium;s__clostridium cellulovorans;superkingdom__bacteria;	99.005	0	708.207	23	1	0	0	0.0120153	0.000596296	0	0	0.00420386
Zotu2177	clostridium clariflavum dsm 19732 ;k__bacteria;p__firmicutes;c__clostridia;o__eubacteriales;f__oscillospiraceae;g__ruminiclostridium;s__[clostridium] clariflavum;superkingdom__bacteria;	96.7742	0	664.926	3	20	0	0	0.00156721	0.0119259	0	0	0.00449771
Zotu285	clostridium cylindrosporum ;k__bacteria;p__firmicutes;c__clostridia;o__eubacteriales;f__clostridiaceae;g__clostridium;s__clostridium cylindrosporum;superkingdom__bacteria;	94.7761	1.63142e-178	631.564	108	280	62	2	0.0564196	0.166963	0.0236128	0.00088964	0.0814421
Zotu2114	clostridium cylindrosporum ;k__bacteria;p__firmicutes;c__clostridia;o__eubacteriales;f__clostridiaceae;g__clostridium;s__clostridium cylindrosporum;superkingdom__bacteria;	95.5446	0	645.991	12	53	1	1	0.00626884	0.0316037	0.000380852	0.00044482	0.0123063
Zotu1557	clostridium cylindrosporum ;k__bacteria;p__firmicutes;c__clostridia;o__eubacteriales;f__clostridiaceae;g__clostridium;s__clostridium cylindrosporum;superkingdom__bacteria;	95.297	0	641.482	8	55	1	1	0.00417923	0.0327963	0.000380852	0.00044482	0.0120073
Zotu1917	clostridium cylindrosporum ;k__bacteria;p__firmicutes;c__clostridia;o__eubacteriales;f__clostridiaceae;g__clostridium;s__clostridium cylindrosporum;superkingdom__bacteria;	96.0199	0	654.106	9	39	0	0	0.00470163	0.0232555	0	0	0.00931906
Zotu3193	clostridium cylindrosporum ;k__bacteria;p__firmicutes;c__clostridia;o__eubacteriales;f__clostridiaceae;g__clostridium;s__clostridium cylindrosporum;superkingdom__bacteria;	96.5174	0	663.123	18	16	0	0	0.00940326	0.00954073	0	0	0.00631466
Zotu2406	clostridium cylindrosporum ;k__bacteria;p__firmicutes;c__clostridia;o__eubacteriales;f__clostridiaceae;g__clostridium;s__clostridium cylindrosporum;superkingdom__bacteria;	95.2736	0	640.581	2	25	0	0	0.00104481	0.0149074	0	0	0.0053174
Zotu2649	clostridium cylindrosporum ;k__bacteria;p__firmicutes;c__clostridia;o__eubacteriales;f__clostridiaceae;g__clostridium;s__clostridium cylindrosporum;superkingdom__bacteria;	97.0149	0	672.139	3	17	1	0	0.00156721	0.010137	0.000380852	0	0.00402836
Zotu3070	clostridium cylindrosporum ;k__bacteria;p__firmicutes;c__clostridia;o__eubacteriales;f__clostridiaceae;g__clostridium;s__clostridium cylindrosporum;superkingdom__bacteria;	94.2786	8.45098e-176	621.645	1	18	0	0	0.000522403	0.0107333	0	0	0.00375191
Zotu1233	clostridium fallax ;k__bacteria;p__firmicutes;c__clostridia;o__eubacteriales;f__clostridiaceae;g__clostridium;s__clostridium fallax;superkingdom__bacteria;	96.2687	0	658.614	21	60	0	1	0.0109705	0.0357777	0	0.00044482	0.0151379
Zotu1534	clostridium fallax ;k__bacteria;p__firmicutes;c__clostridia;o__eubacteriales;f__clostridiaceae;g__clostridium;s__clostridium fallax;superkingdom__bacteria;	96.2687	0	657.713	10	57	1	0	0.00522403	0.0339889	0.000380852	0	0.0131979
Zotu2484	clostridium fallax ;k__bacteria;p__firmicutes;c__clostridia;o__eubacteriales;f__clostridiaceae;g__clostridium;s__clostridium fallax;superkingdom__bacteria;	96.5174	0	663.123	9	13	0	0	0.00470163	0.00775185	0	0	0.00415116
Zotu382	clostridium favososporum ;k__bacteria;p__firmicutes;c__clostridia;o__eubacteriales;f__clostridiaceae;g__clostridium;s__clostridium favososporum;superkingdom__bacteria;	99.7512	0	721.732	51	161	154	1	0.0266426	0.0960036	0.0586512	0.00044482	0.0599877
Zotu689	clostridium favososporum ;k__bacteria;p__firmicutes;c__clostridia;o__eubacteriales;f__clostridiaceae;g__clostridium;s__clostridium favososporum;superkingdom__bacteria;	99.7512	0	720.83	55	149	1	1	0.0287322	0.0888481	0.000380852	0.00044482	0.0388755
Zotu299	clostridium frigidicarnis ;k__bacteria;p__firmicutes;c__clostridia;o__eubacteriales;f__clostridiaceae;g__clostridium;s__clostridium frigidicarnis;superkingdom__bacteria;	99.7512	0	721.732	46	156	260	3	0.0240306	0.0930221	0.0990216	0.00133446	0.0706903
Zotu524	clostridium frigidicarnis ;k__bacteria;p__firmicutes;c__clostridia;o__eubacteriales;f__clostridiaceae;g__clostridium;s__clostridium frigidicarnis;superkingdom__bacteria;	100	0	726.241	85	136	3	1	0.0444043	0.0810962	0.00114256	0.00044482	0.0417695
Zotu2252	clostridium frigidicarnis ;k__bacteria;p__firmicutes;c__clostridia;o__eubacteriales;f__clostridiaceae;g__clostridium;s__clostridium frigidicarnis;superkingdom__bacteria;	88.9724	6.09049e-146	522.46	14	25	0	0	0.00731365	0.0149074	0	0	0.00740701
Zotu429	clostridium histolyticum ;k__bacteria;p__firmicutes;c__clostridia;o__eubacteriales;f__clostridiaceae;g__clostridium;s__clostridium histolyticum;superkingdom__bacteria;	94.7761	1.63142e-178	631.564	82	202	0	0	0.0428371	0.120452	0	0	0.0544296
Zotu465	clostridium histolyticum ;k__bacteria;p__firmicutes;c__clostridia;o__eubacteriales;f__clostridiaceae;g__clostridium;s__clostridium histolyticum;superkingdom__bacteria;	94.2786	8.45098e-176	622.547	33	217	2	1	0.0172393	0.129396	0.000761705	0.00044482	0.0486876
Zotu1317	clostridium hungatei ;k__bacteria;p__firmicutes;c__clostridia;o__eubacteriales;f__oscillospiraceae;g__ruminiclostridium;s__clostridium hungatei;superkingdom__bacteria;	99.2574	0	716.322	16	66	0	0	0.00835845	0.0393555	0	0	0.0159047
Zotu1357	clostridium hungatei ;k__bacteria;p__firmicutes;c__clostridia;o__eubacteriales;f__oscillospiraceae;g__ruminiclostridium;s__clostridium hungatei;superkingdom__bacteria;	100	0	729.847	23	50	0	0	0.0120153	0.0298148	0	0	0.0139434
Zotu1868	clostridium hungatei ;k__bacteria;p__firmicutes;c__clostridia;o__eubacteriales;f__oscillospiraceae;g__ruminiclostridium;s__clostridium hungatei;superkingdom__bacteria;	99.7525	0	725.339	6	54	1	2	0.00313442	0.0322	0.000380852	0.00088964	0.0110154
Zotu2033	clostridium hungatei ;k__bacteria;p__firmicutes;c__clostridia;o__eubacteriales;f__oscillospiraceae;g__ruminiclostridium;s__clostridium hungatei;superkingdom__bacteria;	95.7921	0	653.204	0	48	0	1	0	0.0286222	0	0.00044482	0.00909591
Zotu1727	clostridium hungatei ;k__bacteria;p__firmicutes;c__clostridia;o__eubacteriales;f__oscillospiraceae;g__ruminiclostridium;s__clostridium hungatei;superkingdom__bacteria;	90.3465	4.39342e-154	550.412	15	30	0	0	0.00783605	0.0178889	0	0	0.00857497
Zotu2138	clostridium hungatei ;k__bacteria;p__firmicutes;c__clostridia;o__eubacteriales;f__oscillospiraceae;g__ruminiclostridium;s__clostridium hungatei;superkingdom__bacteria;	94.3069	8.47382e-176	621.645	8	34	0	0	0.00417923	0.0202741	0	0	0.00815109
Zotu2078	clostridium hungatei ;k__bacteria;p__firmicutes;c__clostridia;o__eubacteriales;f__oscillospiraceae;g__ruminiclostridium;s__clostridium hungatei;superkingdom__bacteria;	95.7921	0	653.204	1	39	0	0	0.000522403	0.0232555	0	0	0.00792598
Zotu1839	clostridium hungatei ;k__bacteria;p__firmicutes;c__clostridia;o__eubacteriales;f__oscillospiraceae;g__ruminiclostridium;s__clostridium hungatei;superkingdom__bacteria;	96.2871	0	659.516	1	31	1	0	0.000522403	0.0184852	0.000380852	0	0.00646281
Zotu2540	clostridium hungatei ;k__bacteria;p__firmicutes;c__clostridia;o__eubacteriales;f__oscillospiraceae;g__ruminiclostridium;s__clostridium hungatei;superkingdom__bacteria;	96.2871	0	662.221	0	22	0	0	0	0.0131185	0	0	0.00437284
Zotu2594	clostridium hungatei ;k__bacteria;p__firmicutes;c__clostridia;o__eubacteriales;f__oscillospiraceae;g__ruminiclostridium;s__clostridium hungatei;superkingdom__bacteria;	96.7822	0	671.238	2	18	1	0	0.00104481	0.0107333	0.000380852	0	0.00405299
Zotu3039	clostridium hungatei ;k__bacteria;p__firmicutes;c__clostridia;o__eubacteriales;f__oscillospiraceae;g__ruminiclostridium;s__clostridium hungatei;superkingdom__bacteria;	99.505	0	720.83	7	12	0	0	0.00365682	0.00715555	0	0	0.00360412
Zotu649	clostridium hydrogeniformans ;k__bacteria;p__firmicutes;c__clostridia;o__eubacteriales;f__clostridiaceae;g__clostridium;s__clostridium hydrogeniformans;superkingdom__bacteria;	97.0149	0	672.139	53	119	1	1	0.0276874	0.0709592	0.000380852	0.00044482	0.0325643
Zotu2863	clostridium hydrogeniformans ;k__bacteria;p__firmicutes;c__clostridia;o__eubacteriales;f__clostridiaceae;g__clostridium;s__clostridium hydrogeniformans;superkingdom__bacteria;	98.7562	0	702.797	4	18	0	0	0.00208961	0.0107333	0	0	0.00427431
Zotu2385	clostridium jejuense ;k__bacteria;p__firmicutes;c__clostridia;o__eubacteriales;f__lachnospiraceae;g__lachnoclostridium;s__clostridium jejuense;superkingdom__bacteria;	86.4608	7.28732e-139	499.918	3	17	0	0	0.00156721	0.010137	0	0	0.00390141
Zotu2144	clostridium lundense ;k__bacteria;p__firmicutes;c__clostridia;o__eubacteriales;f__clostridiaceae;g__clostridium;s__clostridium lundense;superkingdom__bacteria;	95.2736	0	639.679	8	19	1	1	0.00417923	0.0113296	0.000380852	0.00044482	0.00485175
Zotu392	clostridium magnum ;k__bacteria;p__firmicutes;c__clostridia;o__eubacteriales;f__clostridiaceae;g__clostridium;s__clostridium magnum;superkingdom__bacteria;	96.5174	0	663.123	52	258	2	3	0.027165	0.153844	0.000761705	0.00133446	0.0592559
Zotu504	clostridium magnum ;k__bacteria;p__firmicutes;c__clostridia;o__eubacteriales;f__clostridiaceae;g__clostridium;s__clostridium magnum;superkingdom__bacteria;	96.5174	0	663.123	29	85	172	3	0.0151497	0.0506851	0.0655066	0.00133446	0.042446
Zotu610	clostridium magnum ;k__bacteria;p__firmicutes;c__clostridia;o__eubacteriales;f__clostridiaceae;g__clostridium;s__clostridium magnum;superkingdom__bacteria;	98.5075	0	699.19	42	138	2	2	0.0219409	0.0822888	0.000761705	0.00088964	0.0341075
Zotu1407	clostridium magnum ;k__bacteria;p__firmicutes;c__clostridia;o__eubacteriales;f__clostridiaceae;g__clostridium;s__clostridium magnum;superkingdom__bacteria;	96.2687	0	658.614	51	70	3	0	0.0266426	0.0417407	0.00114256	0	0.0231753
Zotu811	clostridium magnum ;k__bacteria;p__firmicutes;c__clostridia;o__eubacteriales;f__clostridiaceae;g__clostridium;s__clostridium magnum;superkingdom__bacteria;	96.7662	0	666.729	12	5	123	0	0.00626884	0.00298148	0.0468448	0	0.0186984
Zotu2204	clostridium magnum ;k__bacteria;p__firmicutes;c__clostridia;o__eubacteriales;f__clostridiaceae;g__clostridium;s__clostridium magnum;superkingdom__bacteria;	96.5174	0	663.123	40	57	1	1	0.0208961	0.0339889	0.000380852	0.00044482	0.0179771
Zotu954	clostridium magnum ;k__bacteria;p__firmicutes;c__clostridia;o__eubacteriales;f__clostridiaceae;g__clostridium;s__clostridium magnum;superkingdom__bacteria;	97.7612	0	684.763	68	30	0	0	0.0355234	0.0178889	0	0	0.0178041
Zotu1590	clostridium magnum ;k__bacteria;p__firmicutes;c__clostridia;o__eubacteriales;f__clostridiaceae;g__clostridium;s__clostridium magnum;superkingdom__bacteria;	97.5124	0	681.156	9	67	0	0	0.00470163	0.0399518	0	0	0.0148845
Zotu1931	clostridium magnum ;k__bacteria;p__firmicutes;c__clostridia;o__eubacteriales;f__clostridiaceae;g__clostridium;s__clostridium magnum;superkingdom__bacteria;	99.005	0	708.207	36	35	1	0	0.0188065	0.0208704	0.000380852	0	0.0133526
Zotu1499	clostridium magnum ;k__bacteria;p__firmicutes;c__clostridia;o__eubacteriales;f__clostridiaceae;g__clostridium;s__clostridium magnum;superkingdom__bacteria;	97.0149	0	672.139	17	52	0	0	0.00888086	0.0310074	0	0	0.0132961
Zotu1532	clostridium magnum ;k__bacteria;p__firmicutes;c__clostridia;o__eubacteriales;f__clostridiaceae;g__clostridium;s__clostridium magnum;superkingdom__bacteria;	98.5075	0	699.19	14	54	0	0	0.00731365	0.0322	0	0	0.0131712
Zotu1890	clostridium magnum ;k__bacteria;p__firmicutes;c__clostridia;o__eubacteriales;f__clostridiaceae;g__clostridium;s__clostridium magnum;superkingdom__bacteria;	96.2687	0	658.614	10	51	0	1	0.00522403	0.0304111	0	0.00044482	0.0114336
Zotu1386	clostridium magnum ;k__bacteria;p__firmicutes;c__clostridia;o__eubacteriales;f__clostridiaceae;g__clostridium;s__clostridium magnum;superkingdom__bacteria;	95.0249	3.83674e-180	636.072	23	1	51	0	0.0120153	0.000596296	0.0194235	0	0.0106783
Zotu1571	clostridium magnum ;k__bacteria;p__firmicutes;c__clostridia;o__eubacteriales;f__clostridiaceae;g__clostridium;s__clostridium magnum;superkingdom__bacteria;	96.2687	0	657.713	0	45	0	0	0	0.0268333	0	0	0.00894444
Zotu2196	clostridium magnum ;k__bacteria;p__firmicutes;c__clostridia;o__eubacteriales;f__clostridiaceae;g__clostridium;s__clostridium magnum;superkingdom__bacteria;	98.01	0	690.173	7	18	27	0	0.00365682	0.0107333	0.010283	0	0.00822439
Zotu2278	clostridium magnum ;k__bacteria;p__firmicutes;c__clostridia;o__eubacteriales;f__clostridiaceae;g__clostridium;s__clostridium magnum;superkingdom__bacteria;	99.005	0	708.207	7	29	0	0	0.00365682	0.0172926	0	0	0.00698313
Zotu2386	clostridium magnum ;k__bacteria;p__firmicutes;c__clostridia;o__eubacteriales;f__clostridiaceae;g__clostridium;s__clostridium magnum;superkingdom__bacteria;	96.2687	0	658.614	0	33	0	0	0	0.0196778	0	0	0.00655925
Zotu3139	clostridium magnum ;k__bacteria;p__firmicutes;c__clostridia;o__eubacteriales;f__clostridiaceae;g__clostridium;s__clostridium magnum;superkingdom__bacteria;	99.7512	0	721.732	1	16	2	0	0.000522403	0.00954073	0.000761705	0	0.00360828
Zotu740	clostridium malenominatum ;k__bacteria;p__firmicutes;c__clostridia;o__eubacteriales;f__clostridiaceae;g__clostridium;s__clostridium malenominatum;superkingdom__bacteria;	96.0199	0	654.106	36	97	1	1	0.0188065	0.0578407	0.000380852	0.00044482	0.0252312
Zotu920	clostridium malenominatum ;k__bacteria;p__firmicutes;c__clostridia;o__eubacteriales;f__clostridiaceae;g__clostridium;s__clostridium malenominatum;superkingdom__bacteria;	96.2687	0	657.713	44	73	0	0	0.0229857	0.0435296	0	0	0.0221718
Zotu1763	clostridium malenominatum ;k__bacteria;p__firmicutes;c__clostridia;o__eubacteriales;f__clostridiaceae;g__clostridium;s__clostridium malenominatum;superkingdom__bacteria;	97.2637	0	676.648	6	33	2	0	0.00313442	0.0196778	0.000761705	0	0.00785796
Zotu47	clostridium maritimum ;k__bacteria;p__firmicutes;c__clostridia;o__eubacteriales;f__clostridiaceae;g__clostridium;s__clostridium maritimum;superkingdom__bacteria;	99.7506	0	719.027	463	834	734	10	0.241873	0.497311	0.279546	0.0044482	0.335128
Zotu74	clostridium maritimum ;k__bacteria;p__firmicutes;c__clostridia;o__eubacteriales;f__clostridiaceae;g__clostridium;s__clostridium maritimum;superkingdom__bacteria;	100	0	724.437	306	774	283	8	0.159855	0.461533	0.107781	0.00355856	0.239498
Zotu2946	clostridium maritimum ;k__bacteria;p__firmicutes;c__clostridia;o__eubacteriales;f__clostridiaceae;g__clostridium;s__clostridium maritimum;superkingdom__bacteria;	99.0025	0	706.404	18	2	1	0	0.00940326	0.00119259	0.000380852	0	0.0036589
Zotu1610	clostridium populeti ;k__bacteria;p__firmicutes;c__clostridia;o__eubacteriales;f__lachnospiraceae;g__lachnoclostridium;s__clostridium populeti;superkingdom__bacteria;	98.2587	0	693.78	5	59	1	0	0.00261202	0.0351815	0.000380852	0	0.0127248
Zotu2048	clostridium populeti ;k__bacteria;p__firmicutes;c__clostridia;o__eubacteriales;f__lachnospiraceae;g__lachnoclostridium;s__clostridium populeti;superkingdom__bacteria;	97.7612	0	685.665	8	29	0	0	0.00417923	0.0172926	0	0	0.00715727
Zotu2059	clostridium populeti ;k__bacteria;p__firmicutes;c__clostridia;o__eubacteriales;f__lachnospiraceae;g__lachnoclostridium;s__clostridium populeti;superkingdom__bacteria;	97.2637	0	676.648	1	33	1	0	0.000522403	0.0196778	0.000380852	0	0.00686034
Zotu2083	clostridium populeti ;k__bacteria;p__firmicutes;c__clostridia;o__eubacteriales;f__lachnospiraceae;g__lachnoclostridium;s__clostridium populeti;superkingdom__bacteria;	97.7612	0	685.665	6	28	0	0	0.00313442	0.0166963	0	0	0.00661023
Zotu3129	clostridium populeti ;k__bacteria;p__firmicutes;c__clostridia;o__eubacteriales;f__lachnospiraceae;g__lachnoclostridium;s__clostridium populeti;superkingdom__bacteria;	98.2587	0	694.682	4	29	0	0	0.00208961	0.0172926	0	0	0.00646073
Zotu2895	clostridium populeti ;k__bacteria;p__firmicutes;c__clostridia;o__eubacteriales;f__lachnospiraceae;g__lachnoclostridium;s__clostridium populeti;superkingdom__bacteria;	98.5075	0	699.19	5	24	1	0	0.00261202	0.0143111	0.000380852	0	0.00576799
Zotu2300	clostridium populeti ;k__bacteria;p__firmicutes;c__clostridia;o__eubacteriales;f__lachnospiraceae;g__lachnoclostridium;s__clostridium populeti;superkingdom__bacteria;	97.5124	0	681.156	5	24	0	0	0.00261202	0.0143111	0	0	0.00564104
Zotu2882	clostridium populeti ;k__bacteria;p__firmicutes;c__clostridia;o__eubacteriales;f__lachnospiraceae;g__lachnoclostridium;s__clostridium populeti;superkingdom__bacteria;	98.01	0	690.173	4	23	0	0	0.00208961	0.0137148	0	0	0.00526814
Zotu3168	clostridium populeti ;k__bacteria;p__firmicutes;c__clostridia;o__eubacteriales;f__lachnospiraceae;g__lachnoclostridium;s__clostridium populeti;superkingdom__bacteria;	98.2587	0	694.682	7	20	0	0	0.00365682	0.0119259	0	0	0.00519425
Zotu2401	clostridium populeti ;k__bacteria;p__firmicutes;c__clostridia;o__eubacteriales;f__lachnospiraceae;g__lachnoclostridium;s__clostridium populeti;superkingdom__bacteria;	97.2637	0	676.648	3	23	0	0	0.00156721	0.0137148	0	0	0.005094
Zotu1992	clostridium populeti ;k__bacteria;p__firmicutes;c__clostridia;o__eubacteriales;f__lachnospiraceae;g__lachnoclostridium;s__clostridium populeti;superkingdom__bacteria;	96.7901	0	671.238	1	23	0	0	0.000522403	0.0137148	0	0	0.00474574
Zotu2676	clostridium populeti ;k__bacteria;p__firmicutes;c__clostridia;o__eubacteriales;f__lachnospiraceae;g__lachnoclostridium;s__clostridium populeti;superkingdom__bacteria;	97.7612	0	685.665	2	19	0	0	0.00104481	0.0113296	0	0	0.00412481
Zotu2964	clostridium populeti ;k__bacteria;p__firmicutes;c__clostridia;o__eubacteriales;f__lachnospiraceae;g__lachnoclostridium;s__clostridium populeti;superkingdom__bacteria;	98.2587	0	693.78	5	15	0	0	0.00261202	0.00894444	0	0	0.00385215
Zotu827	clostridium propionicum ;k__bacteria;p__firmicutes;c__clostridia;o__eubacteriales;f__lachnospiraceae;g__tyzzerella;s__clostridium propionicum;superkingdom__bacteria;	99.7531	0	726.241	11	120	1	1	0.00574644	0.0715555	0.000380852	0.00044482	0.0254494
Zotu2567	clostridium propionicum ;k__bacteria;p__firmicutes;c__clostridia;o__eubacteriales;f__lachnospiraceae;g__tyzzerella;s__clostridium propionicum;superkingdom__bacteria;	97.5309	0	686.566	0	24	0	1	0	0.0143111	0	0.00044482	0.00432555
Zotu103	clostridium ruminantium ;k__bacteria;p__firmicutes;c__clostridia;o__eubacteriales;f__clostridiaceae;g__clostridium;s__clostridium ruminantium;superkingdom__bacteria;	100	0	724.437	317	671	111	7	0.165602	0.400114	0.0422746	0.00311374	0.19955
Zotu373	clostridium ruminantium ;k__bacteria;p__firmicutes;c__clostridia;o__eubacteriales;f__clostridiaceae;g__clostridium;s__clostridium ruminantium;superkingdom__bacteria;	97.0149	0	668.533	48	246	3	0	0.0250754	0.146689	0.00114256	0	0.0576356
Zotu457	clostridium ruminantium ;k__bacteria;p__firmicutes;c__clostridia;o__eubacteriales;f__clostridiaceae;g__clostridium;s__clostridium ruminantium;superkingdom__bacteria;	97.2637	0	673.041	42	113	137	2	0.0219409	0.0673814	0.0521768	0.00088964	0.0462767
Zotu648	clostridium ruminantium ;k__bacteria;p__firmicutes;c__clostridia;o__eubacteriales;f__clostridiaceae;g__clostridium;s__clostridium ruminantium;superkingdom__bacteria;	99.2519	0	710.01	105	98	2	1	0.0548523	0.058437	0.000761705	0.00044482	0.0375722
Zotu1385	clostridium ruminantium ;k__bacteria;p__firmicutes;c__clostridia;o__eubacteriales;f__clostridiaceae;g__clostridium;s__clostridium ruminantium;superkingdom__bacteria;	99.0025	0	706.404	0	52	1	1	0	0.0310074	0.000380852	0.00044482	0.0100179
Zotu1964	clostridium sporosphaeroides ;k__bacteria;p__firmicutes;c__clostridia;o__eubacteriales;f__oscillospiraceae;g__ruminiclostridium;s__clostridium sporosphaeroides;superkingdom__bacteria;	94.2786	8.45098e-176	622.547	0	35	0	0	0	0.0208704	0	0	0.00695678
Zotu2883	clostridium sporosphaeroides ;k__bacteria;p__firmicutes;c__clostridia;o__eubacteriales;f__oscillospiraceae;g__ruminiclostridium;s__clostridium sporosphaeroides;superkingdom__bacteria;	96.0199	0	654.106	9	23	0	0	0.00470163	0.0137148	0	0	0.00613881
Zotu2066	clostridium sporosphaeroides ;k__bacteria;p__firmicutes;c__clostridia;o__eubacteriales;f__oscillospiraceae;g__ruminiclostridium;s__clostridium sporosphaeroides;superkingdom__bacteria;	93.2836	2.26771e-170	604.513	0	33	0	1	0	0.0196778	0	0.00044482	0.00611443
Zotu2836	clostridium sporosphaeroides ;k__bacteria;p__firmicutes;c__clostridia;o__eubacteriales;f__oscillospiraceae;g__ruminiclostridium;s__clostridium sporosphaeroides;superkingdom__bacteria;	96.2687	0	657.713	21	9	0	0	0.0109705	0.00536666	0	0	0.00544571
Zotu703	clostridium sufflavum ;k__bacteria;p__firmicutes;c__clostridia;o__eubacteriales;f__oscillospiraceae;g__ruminiclostridium;s__clostridium sufflavum;superkingdom__bacteria;	94.0741	2.95765e-175	619.842	3	17	149	2	0.00156721	0.010137	0.056747	0.00088964	0.0219274
Zotu2001	clostridium sufflavum ;k__bacteria;p__firmicutes;c__clostridia;o__eubacteriales;f__oscillospiraceae;g__ruminiclostridium;s__clostridium sufflavum;superkingdom__bacteria;	99.5062	0	722.634	13	25	0	0	0.00679124	0.0149074	0	0	0.00723288
Zotu1434	clostridium viride ;k__bacteria;p__firmicutes;c__clostridia;o__eubacteriales;f__oscillospiraceae;g__ruminiclostridium;s__clostridium viride;superkingdom__bacteria;	99.2593	0	719.027	5	47	0	1	0.00261202	0.0280259	0	0.00044482	0.00976782
Zotu3086	clostridium xylanovorans ;k__bacteria;p__firmicutes;c__clostridia;o__eubacteriales;f__lachnospiraceae;g__lachnoclostridium;s__clostridium xylanovorans;superkingdom__bacteria;	94.5498	0	652.302	2	16	0	0	0.00104481	0.00954073	0	0	0.00352851
Zotu1046	collimonas arenae ;k__bacteria;p__proteobacteria;c__betaproteobacteria;o__burkholderiales;f__oxalobacteraceae;g__collimonas;s__collimonas arenae;superkingdom__bacteria	92.2717	9.02199e-176	622.547	96	24	0	1	0.0501507	0.0143111	0	0.00044482	0.0210425
Zotu157	collimonas fungivorans ;k__bacteria;p__proteobacteria;c__betaproteobacteria;o__burkholderiales;f__oxalobacteraceae;g__collimonas;s__collimonas fungivorans;superkingdom__bacteria	92.9742	4.09598e-180	636.072	473	90	325	4	0.247097	0.0536666	0.123777	0.00177928	0.139734
Zotu29	conexibacter arvalis ;k__bacteria;p__actinobacteria;c__thermoleophilia;o__solirubrobacterales;f__conexibacteraceae;g__conexibacter;s__conexibacter arvalis; superkingdom__bacteria;	95.5294	0	682.058	405	1231	996	419	0.211573	0.73404	0.379329	0.18638	0.255268
Zotu105	conexibacter arvalis ;k__bacteria;p__actinobacteria;c__thermoleophilia;o__solirubrobacterales;f__conexibacteraceae;g__conexibacter;s__conexibacter arvalis; superkingdom__bacteria;	95.5294	0	681.156	150	321	775	13	0.0783605	0.191411	0.295161	0.00578266	0.182528
Zotu966	conexibacter arvalis ;k__bacteria;p__actinobacteria;c__thermoleophilia;o__solirubrobacterales;f__conexibacteraceae;g__conexibacter;s__conexibacter arvalis; superkingdom__bacteria;	90.5882	1.86121e-165	587.381	15	63	60	0	0.00783605	0.0375666	0.0228511	0	0.0227513
Zotu1085	conexibacter arvalis ;k__bacteria;p__actinobacteria;c__thermoleophilia;o__solirubrobacterales;f__conexibacteraceae;g__conexibacter;s__conexibacter arvalis; superkingdom__bacteria;	90.3529	7.91408e-164	582.873	21	0	125	0	0.0109705	0	0.0476065	0	0.0195257
Zotu2194	conexibacter arvalis ;k__bacteria;p__actinobacteria;c__thermoleophilia;o__solirubrobacterales;f__conexibacteraceae;g__conexibacter;s__conexibacter arvalis; superkingdom__bacteria;	92.7059	2.12177e-177	627.055	28	20	0	0	0.0146273	0.0119259	0	0	0.00885107
Zotu1737	conexibacter arvalis ;k__bacteria;p__actinobacteria;c__thermoleophilia;o__solirubrobacterales;f__conexibacteraceae;g__conexibacter;s__conexibacter arvalis; superkingdom__bacteria;	92.9412	4.98992e-179	632.465	14	34	0	1	0.00731365	0.0202741	0	0.00044482	0.00875108
Zotu2508	conexibacter arvalis ;k__bacteria;p__actinobacteria;c__thermoleophilia;o__solirubrobacterales;f__conexibacteraceae;g__conexibacter;s__conexibacter arvalis; superkingdom__bacteria;	93.4118	0	641.482	14	20	0	1	0.00731365	0.0119259	0	0.00044482	0.00596837
Zotu488	conexibacter woesei ;k__bacteria;p__actinobacteria;c__thermoleophilia;o__solirubrobacterales;f__conexibacteraceae;g__conexibacter;s__conexibacter woesei; superkingdom__bacteria;	94.5882	0	664.024	97	140	2	1	0.0506731	0.0834814	0.000761705	0.00044482	0.0445273
Zotu810	conexibacter woesei ;k__bacteria;p__actinobacteria;c__thermoleophilia;o__solirubrobacterales;f__conexibacteraceae;g__conexibacter;s__conexibacter woesei; superkingdom__bacteria;	95.0588	0	672.139	34	77	37	0	0.0177617	0.0459148	0.0140915	0	0.0259227
Zotu1010	conexibacter woesei ;k__bacteria;p__actinobacteria;c__thermoleophilia;o__solirubrobacterales;f__conexibacteraceae;g__conexibacter;s__conexibacter woesei; superkingdom__bacteria;	94.8235	0	668.533	58	45	0	0	0.0302994	0.0268333	0	0	0.0190442
Zotu1288	conexibacter woesei ;k__bacteria;p__actinobacteria;c__thermoleophilia;o__solirubrobacterales;f__conexibacteraceae;g__conexibacter;s__conexibacter woesei; superkingdom__bacteria;	94.3529	0	659.516	31	61	0	0	0.0161945	0.036374	0	0	0.0175228
Zotu971	conexibacter woesei ;k__bacteria;p__actinobacteria;c__thermoleophilia;o__solirubrobacterales;f__conexibacteraceae;g__conexibacter;s__conexibacter woesei; superkingdom__bacteria;	94.1176	0	654.106	17	3	99	0	0.00888086	0.00178889	0.0377044	0	0.0161247
Zotu1634	conexibacter woesei ;k__bacteria;p__actinobacteria;c__thermoleophilia;o__solirubrobacterales;f__conexibacteraceae;g__conexibacter;s__conexibacter woesei; superkingdom__bacteria;	94.5882	0	663.123	6	0	52	0	0.00313442	0	0.0198043	0	0.00764625
Zotu3078	conexibacter woesei ;k__bacteria;p__actinobacteria;c__thermoleophilia;o__solirubrobacterales;f__conexibacteraceae;g__conexibacter;s__conexibacter woesei; superkingdom__bacteria;	94.8235	0	668.533	13	0	0	0	0.00679124	0	0	0	0.00226375
Zotu212	corynebacterium vitaeruminis dsm 20294 ;k__bacteria;p__actinobacteria;c__actinomycetia;o__corynebacteriales;f__corynebacteriaceae;g__corynebacterium;s__corynebacterium vitaeruminis;superkingdom__bacteria;	99.7549	0	732.552	7	3	7	714	0.00365682	0.00178889	0.00266597	0.317602	-0.314898
Zotu1340	cp000027.1 dehalococcoides ethenogenes str. 195 ;k__bacteria;p__chloroflexi;c__dehalococcoidia;o__dehalococcoidales;f__dehalococcoidaceae;g__dehalococcoides;s__dehalococcoides ethenogenes;superkingdom__bacteria	81.592	1.6372e-102	378.19	6	1	70	0	0.00313442	0.000596296	0.0266597	0	0.0101301
Zotu409	cp000252.1 syntrophus aciditrophicus sb ;k__bacteria;p__proteobacteria;c__deltaproteobacteria;o__syntrophales;f__syntrophaceae;g__syntrophus;s__syntrophus aciditrophicus; subphylum__delta/epsilon subdivisions;superkingdom__bacteria;	89.7196	1.17753e-161	574.758	54	43	281	1	0.0282098	0.0256407	0.107019	0.00044482	0.0531785
Zotu1023	cp000252.1 syntrophus aciditrophicus sb ;k__bacteria;p__proteobacteria;c__deltaproteobacteria;o__syntrophales;f__syntrophaceae;g__syntrophus;s__syntrophus aciditrophicus; subphylum__delta/epsilon subdivisions;superkingdom__bacteria;	88.0841	6.9598e-152	542.297	17	0	111	1	0.00888086	0	0.0422746	0.00044482	0.016607
Zotu1485	cp000252.1 syntrophus aciditrophicus sb ;k__bacteria;p__proteobacteria;c__deltaproteobacteria;o__syntrophales;f__syntrophaceae;g__syntrophus;s__syntrophus aciditrophicus; subphylum__delta/epsilon subdivisions;superkingdom__bacteria;	89.486	5.00697e-160	569.347	0	0	70	0	0	0	0.0266597	0	0.00888655
Zotu1960	cp000252.1 syntrophus aciditrophicus sb ;k__bacteria;p__proteobacteria;c__deltaproteobacteria;o__syntrophales;f__syntrophaceae;g__syntrophus;s__syntrophus aciditrophicus; subphylum__delta/epsilon subdivisions;superkingdom__bacteria;	89.9533	9.66573e-163	579.266	10	27	0	0	0.00522403	0.0161	0	0	0.00710801
Zotu1558	cp000252.1 syntrophus aciditrophicus sb ;k__bacteria;p__proteobacteria;c__deltaproteobacteria;o__syntrophales;f__syntrophaceae;g__syntrophus;s__syntrophus aciditrophicus; subphylum__delta/epsilon subdivisions;superkingdom__bacteria;	92.757	5.00255e-179	632.465	4	0	48	0	0.00208961	0	0.0182809	0	0.00679017
Zotu1967	cp000252.1 syntrophus aciditrophicus sb ;k__bacteria;p__proteobacteria;c__deltaproteobacteria;o__syntrophales;f__syntrophaceae;g__syntrophus;s__syntrophus aciditrophicus; subphylum__delta/epsilon subdivisions;superkingdom__bacteria;	94.4056	0	659.516	0	0	52	0	0	0	0.0198043	0	0.00660144
Zotu3004	cp000252.1 syntrophus aciditrophicus sb ;k__bacteria;p__proteobacteria;c__deltaproteobacteria;o__syntrophales;f__syntrophaceae;g__syntrophus;s__syntrophus aciditrophicus; subphylum__delta/epsilon subdivisions;superkingdom__bacteria;	90.1869	2.27316e-164	583.774	20	0	0	0	0.0104481	0	0	0	0.00348269
Zotu3015	cp000252.1 syntrophus aciditrophicus sb ;k__bacteria;p__proteobacteria;c__deltaproteobacteria;o__syntrophales;f__syntrophaceae;g__syntrophus;s__syntrophus aciditrophicus; subphylum__delta/epsilon subdivisions;superkingdom__bacteria;	89.486	5.00697e-160	570.249	3	1	19	0	0.00156721	0.000596296	0.00723619	0	0.00313323
Zotu1128	cp000699.1 sphingomonas wittichii str. rw1 ;k__bacteria;p__proteobacteria;c__alphaproteobacteria;o__sphingomonadales;f__sphingomonadaceae;g__sphingomonas;s__sphingomonas wittichii;superkingdom__bacteria	98.2587	0	694.682	13	2	91	2	0.00679124	0.00119259	0.0346576	0.00088964	0.0133242
Zotu1578	cp001147.1 thermodesulfovibrio yellowstonii str. dsm 11347 ;k__bacteria;p__nitrospirae;c__thermodesulfovibrionia;o__thermodesulfovibrionales;f__thermodesulfovibrionaceae;g__thermodesulfovibrio;s__thermodesulfovibrio yellowstonii;superkingdom__bacteria;	88.8337	2.12579e-145	520.657	32	20	0	0	0.0167169	0.0119259	0	0	0.00954761
Zotu478	cp001147.1 thermodesulfovibrio yellowstonii str. dsm 11347 ;k__bacteria;p__nitrospirae;c__thermodesulfovibrionia;o__thermodesulfovibrionales;f__thermodesulfovibrionaceae;g__thermodesulfovibrio;s__thermodesulfovibrio yellowstonii;superkingdom__bacteria;	89.0819	4.99938e-147	526.067	15	0	1	266	0.00783605	0	0.000380852	0.118322	-0.115583
Zotu2974	cp001197.1 desulfovibrio vulgaris 'miyazaki f' str. miyazaki f ;k__bacteria;p__proteobacteria;c__deltaproteobacteria;o__desulfovibrionales;f__desulfovibrionaceae;g__desulfovibrio;s__desulfovibrio vulgaris;superkingdom__bacteria;subphylum__delta/epsilon subdivisions	83.7772	6.07967e-121	439.505	16	0	0	0	0.00835845	0	0	0	0.00278615
Zotu215	cp001251.1 dictyoglomus turgidum str. dsm 6724 ;k__bacteria;p__dictyoglomi;c__dictyoglomia;o__dictyoglomales;f__dictyoglomaceae;g__dictyoglomus;s__dictyoglomus turgidum;superkingdom__bacteria	84.3672	1.63575e-121	441.308	174	170	300	4	0.0908982	0.10137	0.114256	0.00177928	0.100395
Zotu520	cp001251.1 dictyoglomus turgidum str. dsm 6724 ;k__bacteria;p__dictyoglomi;c__dictyoglomia;o__dictyoglomales;f__dictyoglomaceae;g__dictyoglomus;s__dictyoglomus turgidum;superkingdom__bacteria	85.3598	6.09587e-127	459.342	96	127	38	1	0.0501507	0.0757296	0.0144724	0.00044482	0.0463394
Zotu3067	cp001251.1 dictyoglomus turgidum str. dsm 6724 ;k__bacteria;p__dictyoglomi;c__dictyoglomia;o__dictyoglomales;f__dictyoglomaceae;g__dictyoglomus;s__dictyoglomus turgidum;superkingdom__bacteria	74.0648	1.35355e-65	255.561	16	0	0	0	0.00835845	0	0	0	0.00278615
Zotu680	cp001721.1 atopobium parvulum str. dsm 20469 ;k__bacteria;p__actinobacteria;c__coriobacteriia;o__coriobacteriales;f__atopobiaceae;g__atopobium;s__atopobium parvulum; superkingdom__bacteria;	90.172	1.27231e-154	551.314	17	51	111	1	0.00888086	0.0304111	0.0422746	0.00044482	0.026744
Zotu1479	cp001721.1 atopobium parvulum str. dsm 20469 ;k__bacteria;p__actinobacteria;c__coriobacteriia;o__coriobacteriales;f__atopobiaceae;g__atopobium;s__atopobium parvulum; superkingdom__bacteria;	89.6806	6.59072e-152	542.297	1	8	46	0	0.000522403	0.00477037	0.0175192	0	0.00760399
Zotu1807	cp001891.1 klebsiella variicola str. _22 ;k__bacteria;p__proteobacteria;c__gammaproteobacteria;o__enterobacterales;f__enterobacteriaceae;g__klebsiella;s__klebsiella variicola; superkingdom__bacteria;	99.7658	0	765.915	0	8	55	0	0	0.00477037	0.0209469	0	0.00857241
Zotu2455	cp001891.1 klebsiella variicola str. _22 ;k__bacteria;p__proteobacteria;c__gammaproteobacteria;o__enterobacterales;f__enterobacteriaceae;g__klebsiella;s__klebsiella variicola; superkingdom__bacteria;	99.5316	0	762.308	0	1	40	0	0	0.000596296	0.0152341	0	0.0052768
Zotu365	cr522870.1 desulfotalea psychrophila str. lsv54 ;k__bacteria;p__proteobacteria;c__deltaproteobacteria;o__desulfobacterales;f__desulfocapsaceae;g__desulfotalea;s__desulfotalea psychrophila; subphylum__delta/epsilon subdivisions;superkingdom__bacteria;	82.4096	5.72305e-115	420.57	164	78	202	2	0.0856741	0.0465111	0.0769322	0.00088964	0.0688161
Zotu722	cr522870.1 desulfotalea psychrophila str. lsv54 ;k__bacteria;p__proteobacteria;c__deltaproteobacteria;o__desulfobacterales;f__desulfocapsaceae;g__desulfotalea;s__desulfotalea psychrophila; subphylum__delta/epsilon subdivisions;superkingdom__bacteria;	83.1325	3.16533e-118	430.488	10	0	157	0	0.00522403	0	0.0597938	0	0.0216726
Zotu829	cr522870.1 desulfotalea psychrophila str. lsv54 ;k__bacteria;p__proteobacteria;c__deltaproteobacteria;o__desulfobacterales;f__desulfocapsaceae;g__desulfotalea;s__desulfotalea psychrophila; subphylum__delta/epsilon subdivisions;superkingdom__bacteria;	82.1687	1.26059e-110	405.241	19	0	139	0	0.00992566	0	0.0529385	0	0.0209547
Zotu1093	cr522870.1 desulfotalea psychrophila str. lsv54 ;k__bacteria;p__proteobacteria;c__deltaproteobacteria;o__desulfobacterales;f__desulfocapsaceae;g__desulfotalea;s__desulfotalea psychrophila; subphylum__delta/epsilon subdivisions;superkingdom__bacteria;	79.4393	4.69005e-97	361.058	0	0	114	0	0	0	0.0434172	0	0.0144724
Zotu1489	cr522870.1 desulfotalea psychrophila str. lsv54 ;k__bacteria;p__proteobacteria;c__deltaproteobacteria;o__desulfobacterales;f__desulfocapsaceae;g__desulfotalea;s__desulfotalea psychrophila; subphylum__delta/epsilon subdivisions;superkingdom__bacteria;	79.6729	1.10299e-98	365.567	17	3	72	0	0.00888086	0.00178889	0.0274214	0	0.012697
Zotu2230	cr522870.1 desulfotalea psychrophila str. lsv54 ;k__bacteria;p__proteobacteria;c__deltaproteobacteria;o__desulfobacterales;f__desulfocapsaceae;g__desulfotalea;s__desulfotalea psychrophila; subphylum__delta/epsilon subdivisions;superkingdom__bacteria;	81.8841	1.26059e-110	406.143	55	4	0	0	0.0287322	0.00238518	0	0	0.0103725
Zotu3050	cr522870.1 desulfotalea psychrophila str. lsv54 ;k__bacteria;p__proteobacteria;c__deltaproteobacteria;o__desulfobacterales;f__desulfocapsaceae;g__desulfotalea;s__desulfotalea psychrophila; subphylum__delta/epsilon subdivisions;superkingdom__bacteria;	81.7746	1.53571e-109	401.634	41	0	0	0	0.0214185	0	0	0	0.00713951
Zotu2818	cr522870.1 desulfotalea psychrophila str. lsv54 ;k__bacteria;p__proteobacteria;c__deltaproteobacteria;o__desulfobacterales;f__desulfocapsaceae;g__desulfotalea;s__desulfotalea psychrophila; subphylum__delta/epsilon subdivisions;superkingdom__bacteria;	82.1687	6.97211e-114	416.061	5	0	11	1	0.00261202	0	0.00418937	0.00044482	0.00182231
Zotu548	cystobacter violaceus ;k__bacteria;p__proteobacteria;c__deltaproteobacteria;o__myxococcales;f__archangiaceae;g__cystobacter;s__cystobacter violaceus; suborder__cystobacterineae;subphylum__delta/epsilon subdivisions;superkingdom__bacteria;	95.0704	0	673.943	150	67	0	3	0.0783605	0.0399518	0	0.00133446	0.038103
Zotu1586	cystobacter violaceus ;k__bacteria;p__proteobacteria;c__deltaproteobacteria;o__myxococcales;f__archangiaceae;g__cystobacter;s__cystobacter violaceus; suborder__cystobacterineae;subphylum__delta/epsilon subdivisions;superkingdom__bacteria;	94.1315	0	655.909	33	19	0	0	0.0172393	0.0113296	0	0	0.00952298
Zotu630	cytophaga xylanolytica ;k__bacteria;p__bacteroidetes;c__cytophagia;o__cytophagales;f__cytophagaceae;g__cytophaga;s__cytophaga xylanolytica;superkingdom__bacteria;superphylum__bacteroidetes/chlorobi group	88.3333	2.91454e-150	536.887	20	37	147	1	0.0104481	0.0220629	0.0559853	0.00044482	0.0290539
Zotu839	d16214.1 rubrivivax gelatinosus str. a3 ;k__bacteria;p__proteobacteria;c__betaproteobacteria;o__burkholderiales;f__burkholderiales;g__rubrivivax;s__rubrivivax gelatinosus;superkingdom__bacteria	96.7213	0	708.207	20	10	144	1	0.0104481	0.00596296	0.0548427	0.00044482	0.0233064
Zotu1239	d16214.1 rubrivivax gelatinosus str. a3 ;k__bacteria;p__proteobacteria;c__betaproteobacteria;o__burkholderiales;f__burkholderiales;g__rubrivivax;s__rubrivivax gelatinosus;superkingdom__bacteria	97.4239	0	721.732	75	15	1	0	0.0391802	0.00894444	0.000380852	0	0.0161685
Zotu1435	d16214.1 rubrivivax gelatinosus str. a3 ;k__bacteria;p__proteobacteria;c__betaproteobacteria;o__burkholderiales;f__burkholderiales;g__rubrivivax;s__rubrivivax gelatinosus;superkingdom__bacteria	96.9555	0	712.715	35	31	1	1	0.0182841	0.0184852	0.000380852	0.00044482	0.0119386
Zotu2826	d16214.1 rubrivivax gelatinosus str. a3 ;k__bacteria;p__proteobacteria;c__betaproteobacteria;o__burkholderiales;f__burkholderiales;g__rubrivivax;s__rubrivivax gelatinosus;superkingdom__bacteria	97.1897	0	717.224	15	15	0	0	0.00783605	0.00894444	0	0	0.0055935
Zotu281	dechloromonas agitata ;k__bacteria;p__proteobacteria;c__betaproteobacteria;o__rhodocyclales;f__azonexaceae;g__dechloromonas;s__dechloromonas agitata; superkingdom__bacteria;	91.8033	4.6735e-173	613.53	230	39	205	3	0.120153	0.0232555	0.0780747	0.00133446	0.0724932
Zotu719	dechloromonas agitata ;k__bacteria;p__proteobacteria;c__betaproteobacteria;o__rhodocyclales;f__azonexaceae;g__dechloromonas;s__dechloromonas agitata; superkingdom__bacteria;	93.2084	0	640.581	39	26	130	2	0.0203737	0.0155037	0.0495108	0.00088964	0.0275731
Zotu878	dechloromonas agitata ;k__bacteria;p__proteobacteria;c__betaproteobacteria;o__rhodocyclales;f__azonexaceae;g__dechloromonas;s__dechloromonas agitata; superkingdom__bacteria;	92.757	7.4057e-177	625.252	50	67	0	1	0.0261202	0.0399518	0	0.00044482	0.0215792
Zotu2124	defluviicoccus vanus ;k__bacteria;p__proteobacteria;c__alphaproteobacteria;o__rhodospirillales;f__rhodospirillaceae;g__defluviicoccus;s__defluviicoccus vanus;superkingdom__bacteria	92.0398	7.41319e-164	581.971	57	4	0	1	0.029777	0.00238518	0	0.00044482	0.0102759
Zotu1413	defluviicoccus vanus ;k__bacteria;p__proteobacteria;c__alphaproteobacteria;o__rhodospirillales;f__rhodospirillaceae;g__defluviicoccus;s__defluviicoccus vanus;superkingdom__bacteria	93.5323	5.33315e-172	609.022	58	0	0	1	0.0302994	0	0	0.00044482	0.00965498
Zotu1778	defluviicoccus vanus ;k__bacteria;p__proteobacteria;c__alphaproteobacteria;o__rhodospirillales;f__rhodospirillaceae;g__defluviicoccus;s__defluviicoccus vanus;superkingdom__bacteria	90.5473	1.03045e-155	554.921	28	0	10	1	0.0146273	0	0.00380852	0.00044482	0.00570045
Zotu1681	dehalobacterium formicoaceticum ;k__bacteria;p__firmicutes;c__clostridia;o__eubacteriales;f__peptococcaceae;g__dehalobacterium;s__dehalobacterium formicoaceticum;superkingdom__bacteria;	92.757	5.00255e-179	633.367	4	41	0	0	0.00208961	0.0244481	0	0	0.00884591
Zotu42	dehalogenimonas alkenigignens ;k__bacteria;p__chloroflexi;c__dehalococcoidia;o__dehalococcoidia;f__dehalococcoidia;g__dehalogenimonas;s__dehalogenimonas alkenigignens;superkingdom__bacteria	85.7143	6.09587e-127	459.342	1172	475	637	13	0.612257	0.283241	0.242603	0.00578266	0.373584
Zotu57	dehalogenimonas alkenigignens ;k__bacteria;p__chloroflexi;c__dehalococcoidia;o__dehalococcoidia;f__dehalococcoidia;g__dehalogenimonas;s__dehalogenimonas alkenigignens;superkingdom__bacteria	85.4637	7.4263e-126	455.735	846	424	535	7	0.441953	0.252829	0.203756	0.00311374	0.296399
Zotu61	dehalogenimonas alkenigignens ;k__bacteria;p__chloroflexi;c__dehalococcoidia;o__dehalococcoidia;f__dehalococcoidia;g__dehalogenimonas;s__dehalogenimonas alkenigignens;superkingdom__bacteria	85.213	3.15774e-124	450.325	691	491	542	6	0.360981	0.292781	0.206422	0.00266892	0.284059
Zotu101	dehalogenimonas alkenigignens ;k__bacteria;p__chloroflexi;c__dehalococcoidia;o__dehalococcoidia;f__dehalococcoidia;g__dehalogenimonas;s__dehalogenimonas alkenigignens;superkingdom__bacteria	85.4637	7.4263e-126	455.735	597	141	368	6	0.311875	0.0840777	0.140154	0.00266892	0.176033
Zotu334	dehalogenimonas alkenigignens ;k__bacteria;p__chloroflexi;c__dehalococcoidia;o__dehalococcoidia;f__dehalococcoidia;g__dehalogenimonas;s__dehalogenimonas alkenigignens;superkingdom__bacteria	85.213	3.15774e-124	451.227	225	93	18	2	0.117541	0.0554555	0.00685534	0.00088964	0.0590609
Zotu383	dehalogenimonas alkenigignens ;k__bacteria;p__chloroflexi;c__dehalococcoidia;o__dehalococcoidia;f__dehalococcoidia;g__dehalogenimonas;s__dehalogenimonas alkenigignens;superkingdom__bacteria	85.4637	7.4263e-126	455.735	110	23	179	2	0.0574644	0.0137148	0.0681726	0.00088964	0.0455609
Zotu452	dehalogenimonas alkenigignens ;k__bacteria;p__chloroflexi;c__dehalococcoidia;o__dehalococcoidia;f__dehalococcoidia;g__dehalogenimonas;s__dehalogenimonas alkenigignens;superkingdom__bacteria	85.9649	1.43361e-128	464.752	50	42	174	0	0.0261202	0.0250444	0.0662683	0	0.0391443
Zotu500	dehalogenimonas alkenigignens ;k__bacteria;p__chloroflexi;c__dehalococcoidia;o__dehalococcoidia;f__dehalococcoidia;g__dehalogenimonas;s__dehalogenimonas alkenigignens;superkingdom__bacteria	85.213	3.15774e-124	450.325	1	0	232	2	0.000522403	0	0.0883577	0.00088964	0.0287371
Zotu1060	dehalogenimonas alkenigignens ;k__bacteria;p__chloroflexi;c__dehalococcoidia;o__dehalococcoidia;f__dehalococcoidia;g__dehalogenimonas;s__dehalogenimonas alkenigignens;superkingdom__bacteria	86.2155	1.17678e-129	469.261	81	37	1	0	0.0423147	0.0220629	0.000380852	0	0.0215862
Zotu793	dehalogenimonas alkenigignens ;k__bacteria;p__chloroflexi;c__dehalococcoidia;o__dehalococcoidia;f__dehalococcoidia;g__dehalogenimonas;s__dehalogenimonas alkenigignens;superkingdom__bacteria	91.3151	4.69088e-160	569.347	0	0	169	0	0	0	0.064364	0	0.0214547
Zotu1371	dehalogenimonas alkenigignens ;k__bacteria;p__chloroflexi;c__dehalococcoidia;o__dehalococcoidia;f__dehalococcoidia;g__dehalogenimonas;s__dehalogenimonas alkenigignens;superkingdom__bacteria	84.9624	3.84692e-123	446.718	80	6	0	0	0.0417923	0.00357777	0	0	0.0151233
Zotu1005	dehalogenimonas alkenigignens ;k__bacteria;p__chloroflexi;c__dehalococcoidia;o__dehalococcoidia;f__dehalococcoidia;g__dehalogenimonas;s__dehalogenimonas alkenigignens;superkingdom__bacteria	86.8812	4.40916e-135	486.393	4	0	104	1	0.00208961	0	0.0396086	0.00044482	0.0134546
[truncated: 1,759 more rows]
